# Supplementary material for: Asymmetric, visible light-mediated radical sulfinyl-Smiles rearrangement to access all-carbon quaternary stereocentres
Source: Springer Nature journal article supplement (doi:10.1038/s41557-021-00668-4), 2021-04-01
Supplement: 41557_2021_668_MOESM59_ESM.cif [file 41557_2021_668_MOESM59_ESM.cif]

data_NV1802
 
_publ_contact_author_name         'Dr. Olivier Blacque'
_publ_contact_author_address
; Department of Chemistry
  University of Zurich
  Winterthurerstrasse 190
  CH-8057 Zurich
  Switzerland
;
_publ_contact_author_email        olivier.blacque@chem.uzh.ch

# start Validation Reply Form
_vrf_CHEMW03_NV1802
;
PROBLEM: ALERT: The ratio of given/expected molecular weight as
RESPONSE: SQUEEZE was used to handle three acetone and one hexane solvent 
molecules per asymmetric unit which were somewhat disordered, so the model 
only contains atoms for the amide-molecule, but the reported formula and 
related parameters include the estimated real solvent content in the 
crystal. See _refine_special_details
;
# end Validation Reply Form

_audit_creation_method            'SHELXL-2018/3'
_shelx_SHELXL_version_number      '2018/3'
_chemical_name_systematic         ?
_chemical_name_common             ?
_chemical_melting_point           ?
_chemical_formula_moiety          '4(C28 H33 N O3 S), 3(C3 H6 O), C6 H14'
_chemical_formula_sum             'C127 H164 N4 O15 S4' 
_chemical_formula_weight          2114.85

loop_
 _atom_type_symbol
 _atom_type_description
 _atom_type_scat_dispersion_real
 _atom_type_scat_dispersion_imag
 _atom_type_scat_source
 'C'  'C'   0.0181   0.0091
 'International Tables Vol C Tables 4.2.6.8 and 6.1.1.4'
 'H'  'H'   0.0000   0.0000
 'International Tables Vol C Tables 4.2.6.8 and 6.1.1.4'
 'N'  'N'   0.0311   0.0180
 'International Tables Vol C Tables 4.2.6.8 and 6.1.1.4'
 'O'  'O'   0.0492   0.0322
 'International Tables Vol C Tables 4.2.6.8 and 6.1.1.4'
 'S'  'S'   0.3331   0.5567
 'International Tables Vol C Tables 4.2.6.8 and 6.1.1.4'
 
_space_group_crystal_system       monoclinic
_space_group_IT_number            4
_space_group_name_H-M_alt         'P 21'
_space_group_name_Hall            'P 2yb'
 
_shelx_space_group_comment
;
The symmetry employed for this shelxl refinement is uniquely defined
by the following loop, which should always be used as a source of
symmetry information in preference to the above space-group names.
They are only intended as comments.
;
 
loop_
 _space_group_symop_operation_xyz
 'x, y, z'
 '-x, y+1/2, -z'
 
_cell_length_a                    22.9134(3)
_cell_length_b                    9.71547(9)
_cell_length_c                    27.9763(3)
_cell_angle_alpha                 90
_cell_angle_beta                  104.6608(11)
_cell_angle_gamma                 90
_cell_volume                      6025.15(11)
_cell_formula_units_Z             2
_cell_measurement_temperature     160(2)
_cell_measurement_reflns_used   36829
_cell_measurement_theta_min     3.3740
_cell_measurement_theta_max     76.6310

_exptl_crystal_description        plate
_exptl_crystal_colour             colourless
_exptl_crystal_size_max           0.30
_exptl_crystal_size_mid           0.13
_exptl_crystal_size_min           0.02
loop_
_exptl_crystal_face_index_h
_exptl_crystal_face_index_k
_exptl_crystal_face_index_l
_exptl_crystal_face_perp_dist
   1    0    1 0.0029
  -1    0   -1 0.0169
   1    0   -1 0.0606
  -1    0    1 0.0606
   2    5    2 0.1468
  -2   -5   -2 0.1398
  -6    5    9 0.1394
loop_
_exptl_oxdiff_crystal_face_indexfrac_h
_exptl_oxdiff_crystal_face_indexfrac_k
_exptl_oxdiff_crystal_face_indexfrac_l
_exptl_oxdiff_crystal_face_x
_exptl_oxdiff_crystal_face_y
_exptl_oxdiff_crystal_face_z
 0.9992 -0.0002  1.0009 -0.1000 -0.0062 -0.0045
-0.9992  0.0002 -1.0009  0.1000  0.0062  0.0045
 1.0006  0.0001 -0.9992 -0.0103 -0.0415 -0.0651
-1.0006 -0.0001  0.9992  0.0103  0.0415  0.0651
 1.9849  5.0009  1.9976 -0.1773 -0.6820  0.4152
-1.9849 -5.0009 -1.9976  0.1773  0.6820 -0.4152
-6.0194  4.9998  8.9914 -0.0497 -0.3674  0.9058
_exptl_crystal_density_meas       ?
_exptl_crystal_density_method     ?
_exptl_crystal_density_diffrn     1.166          
_exptl_crystal_F_000              2276
_exptl_transmission_factor_min    ?
_exptl_transmission_factor_max    ?
_exptl_absorpt_coefficient_mu     1.217
_shelx_estimated_absorpt_T_min    0.712
_shelx_estimated_absorpt_T_max    0.976
_exptl_absorpt_correction_T_min                     0.776
_exptl_absorpt_correction_T_max                     0.976
_exptl_absorpt_correction_type            analytical
_exptl_absorpt_process_details
;
Analytical numeric absorption correction using a multifaceted crystal
model [Clark, R. C. & Reid, J. S. (1995). Acta Cryst. A51, 887-897] 
plus an empirical absorption correction using spherical harmonics, 
implemented in the SCALE3 ABSPACK scaling algorithm.
CrysAlisPro, Version 1.171.39.13a (Rigaku Oxford Diffraction, 2016)
;
_oxdiff_exptl_absorpt_empirical_full_min           0.650
_oxdiff_exptl_absorpt_empirical_full_max           1.456
_oxdiff_exptl_absorpt_empirical_details
;
Empirical correction (ABSPACK) includes:
- Absorption correction using spherical harmonics
- Frame scaling
- Detector area scaling
;

_exptl_special_details
;
Data collection and full structure determination
done by Dr. Olivier Blacque: olivier.blacque@chem.uzh.ch

Solvent used: acetone / hexane
Cooling Device: Oxford Cryosystems Cryostream 800
Crystal mount: on a glass fibre
Frames collected: 3615
Seconds exposure per frame: 5.0-20.0
Degrees rotation per frame: 0.6
Crystal-detector distance (mm): 32.0
Client: Cedric Hervieu
Sample code: NV1802
;

_diffrn_ambient_temperature       160(2)
_diffrn_ambient_environment       N~2~
_diffrn_radiation_wavelength      1.54184
_diffrn_radiation_type            'Cu K\a'
_diffrn_source                    'micro-focus sealed X-ray tube'
_diffrn_source_type               'PhotonJet (Cu) X-ray source'
_diffrn_radiation_probe           x-ray
_diffrn_radiation_monochromator   mirror
_diffrn_measurement_device        'four-circle \k-geometry diffractometer'
_diffrn_measurement_device_type 
'Rigaku Oxford Diffraction XtaLAB Synergy, dual radiation diffractometer'
_diffrn_detector                  'hybrid pixel area detector'
_diffrn_detector_type 'Pilatus 200K hybrid pixel area detector on \k goniostat'
_diffrn_detector_area_resol_mean  5.81
_diffrn_measurement_method '\w scans'
_diffrn_reflns_number             81375
_diffrn_reflns_av_unetI/netI      0.0339
_diffrn_reflns_av_R_equivalents   0.0348
_diffrn_reflns_limit_h_min        -27
_diffrn_reflns_limit_h_max        27
_diffrn_reflns_limit_k_min        -11
_diffrn_reflns_limit_k_max        11
_diffrn_reflns_limit_l_min        -33
_diffrn_reflns_limit_l_max        33
_diffrn_reflns_theta_min          3.266
_diffrn_reflns_theta_max          68.250
_diffrn_reflns_theta_full         67.684
_diffrn_measured_fraction_theta_max   0.999
_diffrn_measured_fraction_theta_full  0.999
_diffrn_reflns_Laue_measured_fraction_max    0.999
_diffrn_reflns_Laue_measured_fraction_full   0.999
_diffrn_reflns_point_group_measured_fraction_max   0.997
_diffrn_reflns_point_group_measured_fraction_full  0.997
_reflns_number_total              22014
_reflns_number_gt                 19794
_reflns_threshold_expression      'I > 2\s(I)'
_reflns_Friedel_coverage          0.876
_reflns_Friedel_fraction_max      0.994
_reflns_Friedel_fraction_full     0.995
 
_reflns_special_details
;
 Reflections were merged by SHELXL according to the crystal
 class for the calculation of statistics and refinement.
 
 Structure factors included contributions from the .fab file.
 
 _reflns_Friedel_fraction is defined as the number of unique
 Friedel pairs measured divided by the number that would be
 possible theoretically, ignoring centric projections and
 systematic absences.
;
 
_computing_data_collection
'CrysAlisPro, Version 1.171.39.13a (Rigaku Oxford Diffraction, 2017)'
_computing_cell_refinement
'CrysAlisPro, Version 1.171.39.13a (Rigaku Oxford Diffraction, 2017)'
_computing_data_reduction
'CrysAlisPro, Version 1.171.39.13a (Rigaku Oxford Diffraction, 2017)'
_computing_structure_solution     'SHELXT-2014 (Sheldrick, 2015a)'
_computing_structure_refinement   'SHELXL-2018 (Sheldrick, 2015b)'
_computing_molecular_graphics     'ORTEPII (Johnson, 1976)'
_computing_publication_material   'SHELXL-2018 and PLATON (Spek, 2015)'

# SQUEEZE RESULTS (Version =  71116)
# Note: Data are Listed for all Voids in the P1 Unit Cell
# i.e. Centre of Gravity, Solvent Accessible Volume,
# Recovered number of Electrons in the Void and
# Details about the Squeezed Material
loop_
  _platon_squeeze_void_nr
  _platon_squeeze_void_average_x
  _platon_squeeze_void_average_y
  _platon_squeeze_void_average_z
  _platon_squeeze_void_volume
  _platon_squeeze_void_count_electrons
  _platon_squeeze_void_content
   1  0.000 -0.122  0.000      1374       268 ' '
# Missing Reflections Below sin(th)/lambda = 0.25
loop_
  _platon_missing_refln_index_h
  _platon_missing_refln_index_k
  _platon_missing_refln_index_l
  _platon_missing_refln_theta
    1    0    0     1.993
   -1    0    1     2.234
    0    0    1     1.632
    1    0    1     2.879
    5    0    5    14.543
    4    2    6    17.030
    1    0    7    12.174
    3    0    9    17.472
    1    1   11    19.478
    1    0   13    22.370
_platon_squeeze_void_probe_radius                  1.20
_platon_squeeze_details 'see _refine_special_details'

_refine_special_details
;
The asymmetric unit contains four molecules of the amide-compound plus 
three molecules of acetone and one molecule of hexane.  The residual 
electron density peaks were consistent with the presence of these solvent 
molecules, however it was difficult to model the disordered solvent 
adequately, so the SQUEEZE routine of the program PLATON was employed.  
Omission of the solvent molecules leaves one cavity of 1374 \%A^3^ per unit 
cell.  The number of electrons contributing to each void in the structure 
was calculated by the SQUEEZE routine to be approximately 268 e.  Allowing 
for six molecules of acetone and two molecules of hexane per cavity 
(equivalent to three and one, respectively, per asymmetric unit) yields 
280 e and this approximation was been used in the subsequent calculation 
of the empirical formula, formula weight, density, linear absorption 
coefficient and F(000).  Based on the assumption, the ratio of amide-compound 
to acetone and hexane molecules in the structure is 4:3:1.
;

_refine_ls_structure_factor_coef  Fsqd
_refine_ls_matrix_type            full
_refine_ls_weighting_scheme       calc
_refine_ls_weighting_details
'w=1/[\s^2^(Fo^2^)+(0.0747P)^2^+0.4000P] where P=(Fo^2^+2Fc^2^)/3'
_atom_sites_solution_primary      ?
_atom_sites_solution_secondary    ?
_atom_sites_solution_hydrogens    'geom & difmap'
_refine_ls_hydrogen_treatment     mixed
_refine_ls_extinction_method      none
_refine_ls_extinction_coef        .
_refine_ls_abs_structure_details
;
 Flack x determined using 8231 quotients [(I+)-(I-)]/[(I+)+(I-)]
 (Parsons, Flack and Wagner, Acta Cryst. B69 (2013) 249-259).
;
_refine_ls_abs_structure_Flack    0.009(5)
_chemical_absolute_configuration  ad
_refine_ls_number_reflns          22012
_refine_ls_number_parameters      1229
_refine_ls_number_restraints      1
_refine_ls_R_factor_all           0.0467
_refine_ls_R_factor_gt            0.0411
_refine_ls_wR_factor_ref          0.1127
_refine_ls_wR_factor_gt           0.1092
_refine_ls_goodness_of_fit_ref    1.032
_refine_ls_restrained_S_all       1.032
_refine_ls_shift/su_max           0.004
_refine_ls_shift/su_mean          0.000
_refine_diff_density_max    0.481
_refine_diff_density_min   -0.203
_refine_diff_density_rms    0.039
 
loop_
 _atom_site_label
 _atom_site_type_symbol
 _atom_site_fract_x
 _atom_site_fract_y
 _atom_site_fract_z
 _atom_site_U_iso_or_equiv
 _atom_site_adp_type
 _atom_site_occupancy
 _atom_site_site_symmetry_order  
 _atom_site_calc_flag
 _atom_site_refinement_flags_posn
 _atom_site_refinement_flags_adp
 _atom_site_refinement_flags_occupancy
 _atom_site_disorder_assembly
 _atom_site_disorder_group
C1 C 0.21107(13) 0.0410(3) 0.52201(10) 0.0318(6) Uani 1 1 d . . . . .
C2 C 0.26230(12) 0.0028(3) 0.49665(10) 0.0306(6) Uani 1 1 d . . . . .
C3 C 0.36117(12) 0.0869(3) 0.48726(11) 0.0336(6) Uani 1 1 d . . . . .
C4 C 0.40389(15) 0.1895(4) 0.50444(14) 0.0463(8) Uani 1 1 d . . . . .
H4A H 0.395528 0.260558 0.525087 0.056 Uiso 1 1 calc R U . . .
C5 C 0.45848(15) 0.1886(4) 0.49156(14) 0.0505(8) Uani 1 1 d . . . . .
H5 H 0.486933 0.259684 0.503416 0.061 Uiso 1 1 calc R U . . .
C6 C 0.47243(14) 0.0863(4) 0.46178(12) 0.0450(7) Uani 1 1 d . . . . .
C7 C 0.42966(14) -0.0157(4) 0.44567(13) 0.0458(7) Uani 1 1 d . . . . .
H7 H 0.438521 -0.087728 0.425636 0.055 Uiso 1 1 calc R U . . .
C8 C 0.37438(14) -0.0170(3) 0.45761(11) 0.0382(7) Uani 1 1 d . . . . .
H8 H 0.345990 -0.088134 0.445628 0.046 Uiso 1 1 calc R U . . .
C9 C 0.53139(16) 0.0858(5) 0.44735(16) 0.0642(11) Uani 1 1 d . . . . .
H9A H 0.543659 -0.009404 0.443605 0.096 Uiso 1 1 calc R U . . .
H9B H 0.562338 0.131598 0.473079 0.096 Uiso 1 1 calc R U . . .
H9C H 0.526583 0.134841 0.415985 0.096 Uiso 1 1 calc R U . . .
C10 C 0.23690(14) 0.1163(3) 0.57105(11) 0.0391(7) Uani 1 1 d . . . . .
H10A H 0.270096 0.062313 0.591498 0.059 Uiso 1 1 calc R U . . .
H10B H 0.205177 0.127721 0.588542 0.059 Uiso 1 1 calc R U . . .
H10C H 0.251929 0.206904 0.564415 0.059 Uiso 1 1 calc R U . . .
C11 C 0.18582(13) -0.0993(3) 0.53363(11) 0.0349(6) Uani 1 1 d . . . . .
H11A H 0.216978 -0.142976 0.560405 0.042 Uiso 1 1 calc R U . . .
H11B H 0.181061 -0.158113 0.503990 0.042 Uiso 1 1 calc R U . . .
C12 C 0.05902(12) -0.1069(3) 0.49533(11) 0.0370(6) Uani 1 1 d . . . . .
C13 C 0.02247(13) 0.0052(3) 0.48180(12) 0.0389(7) Uani 1 1 d . . . . .
H13 H 0.027807 0.084469 0.502305 0.047 Uiso 1 1 calc R U . . .
C14 C -0.02242(13) 0.0024(3) 0.43798(12) 0.0398(7) Uani 1 1 d . . . . .
H14 H -0.048443 0.079506 0.429177 0.048 Uiso 1 1 calc R U . . .
C15 C -0.03010(14) -0.1118(3) 0.40645(11) 0.0397(7) Uani 1 1 d . . . . .
C16 C 0.00802(16) -0.2252(3) 0.42154(13) 0.0455(7) Uani 1 1 d . . . . .
H16 H 0.003477 -0.304683 0.401149 0.055 Uiso 1 1 calc R U . . .
C17 C 0.05190(15) -0.2231(3) 0.46541(12) 0.0432(7) Uani 1 1 d . . . . .
H17 H 0.077269 -0.300777 0.475216 0.052 Uiso 1 1 calc R U . . .
C18 C -0.07921(15) -0.1088(4) 0.35794(12) 0.0480(8) Uani 1 1 d . . . . .
C19 C -0.0668(2) 0.0134(5) 0.32685(15) 0.0651(11) Uani 1 1 d . . . . .
H19A H -0.070294 0.099787 0.344001 0.098 Uiso 1 1 calc R U . . .
H19B H -0.096121 0.012831 0.294584 0.098 Uiso 1 1 calc R U . . .
H19C H -0.025910 0.005401 0.322200 0.098 Uiso 1 1 calc R U . . .
C20 C -0.0803(2) -0.2398(5) 0.32807(15) 0.0645(11) Uani 1 1 d . . . . .
H20A H -0.041343 -0.251498 0.320105 0.097 Uiso 1 1 calc R U . . .
H20B H -0.112398 -0.233484 0.297423 0.097 Uiso 1 1 calc R U . . .
H20C H -0.087884 -0.318826 0.347411 0.097 Uiso 1 1 calc R U . . .
C21 C -0.14049(16) -0.0896(5) 0.36855(14) 0.0627(11) Uani 1 1 d . . . . .
H21A H -0.149774 -0.170067 0.386454 0.094 Uiso 1 1 calc R U . . .
H21B H -0.171394 -0.079616 0.337340 0.094 Uiso 1 1 calc R U . . .
H21C H -0.139863 -0.006908 0.388714 0.094 Uiso 1 1 calc R U . . .
C22 C 0.16366(13) 0.1260(3) 0.48497(10) 0.0312(6) Uani 1 1 d . . . . .
C23 C 0.13960(14) 0.2462(3) 0.49904(12) 0.0379(6) Uani 1 1 d . . . . .
H23 H 0.152653 0.277114 0.532267 0.045 Uiso 1 1 calc R U . . .
C24 C 0.09683(14) 0.3218(3) 0.46525(12) 0.0430(7) Uani 1 1 d . . . . .
H24 H 0.080877 0.403129 0.475903 0.052 Uiso 1 1 calc R U . . .
C25 C 0.07682(13) 0.2814(3) 0.41635(12) 0.0388(7) Uani 1 1 d . . . . .
C26 C 0.10129(14) 0.1610(3) 0.40222(11) 0.0383(7) Uani 1 1 d . . . . .
H26 H 0.088679 0.130905 0.368878 0.046 Uiso 1 1 calc R U . . .
C27 C 0.14356(13) 0.0849(3) 0.43592(11) 0.0338(6) Uani 1 1 d . . . . .
H27 H 0.159166 0.002912 0.425376 0.041 Uiso 1 1 calc R U . . .
C28 C 0.03097(17) 0.3652(4) 0.37969(14) 0.0560(9) Uani 1 1 d . . . . .
H28A H 0.048796 0.453675 0.374258 0.084 Uiso 1 1 calc R U . . .
H28B H -0.004378 0.381252 0.392636 0.084 Uiso 1 1 calc R U . . .
H28C H 0.018707 0.315092 0.348333 0.084 Uiso 1 1 calc R U . . .
N1 N 0.30652(11) 0.0957(3) 0.50215(10) 0.0354(5) Uani 1 1 d . . . . .
H1 H 0.3028(16) 0.164(4) 0.5135(13) 0.041(10) Uiso 1 1 d . . . . .
O1 O 0.26094(9) -0.1047(2) 0.47358(7) 0.0350(4) Uani 1 1 d . . . . .
O2 O 0.11672(11) -0.2374(3) 0.57464(9) 0.0518(6) Uani 1 1 d . . . . .
O3 O 0.10861(10) 0.0161(3) 0.57869(8) 0.0462(5) Uani 1 1 d . . . . .
S1 S 0.11644(3) -0.10458(8) 0.55139(3) 0.03851(17) Uani 1 1 d . . . . .
C29 C 0.26162(13) 0.4959(3) 0.42924(10) 0.0331(6) Uani 1 1 d . . . . .
C30 C 0.28370(13) 0.4950(3) 0.48591(10) 0.0315(6) Uani 1 1 d . . . . .
C31 C 0.30535(13) 0.6535(3) 0.55729(10) 0.0343(6) Uani 1 1 d . . . . .
C32 C 0.34227(14) 0.7648(3) 0.57560(11) 0.0396(7) Uani 1 1 d . . . . .
H32 H 0.362037 0.813258 0.554712 0.048 Uiso 1 1 calc R U . . .
C33 C 0.35025(15) 0.8048(4) 0.62412(13) 0.0530(9) Uani 1 1 d . . . . .
H33 H 0.375333 0.881490 0.636365 0.064 Uiso 1 1 calc R U . . .
C34 C 0.32233(19) 0.7351(5) 0.65506(13) 0.0664(12) Uani 1 1 d . . . . .
C35 C 0.28481(18) 0.6251(5) 0.63651(13) 0.0606(10) Uani 1 1 d . . . . .
H35 H 0.264685 0.577768 0.657411 0.073 Uiso 1 1 calc R U . . .
C36 C 0.27635(16) 0.5835(4) 0.58791(12) 0.0462(7) Uani 1 1 d . . . . .
H36 H 0.250877 0.507535 0.575597 0.055 Uiso 1 1 calc R U . . .
C37 C 0.3337(3) 0.7743(9) 0.70944(16) 0.109(2) Uani 1 1 d . . . . .
H37A H 0.295897 0.804883 0.716266 0.163 Uiso 1 1 calc R U . . .
H37B H 0.363398 0.849000 0.716959 0.163 Uiso 1 1 calc R U . . .
H37C H 0.349249 0.694186 0.730028 0.163 Uiso 1 1 calc R U . . .
C38 C 0.19984(14) 0.5686(3) 0.41651(12) 0.0417(7) Uani 1 1 d . . . . .
H38A H 0.205261 0.665891 0.425802 0.063 Uiso 1 1 calc R U . . .
H38B H 0.173440 0.524917 0.434689 0.063 Uiso 1 1 calc R U . . .
H38C H 0.181527 0.561168 0.380933 0.063 Uiso 1 1 calc R U . . .
C39 C 0.25321(14) 0.3435(3) 0.41299(10) 0.0359(6) Uani 1 1 d . . . . .
H39A H 0.222358 0.303444 0.428064 0.043 Uiso 1 1 calc R U . . .
H39B H 0.291607 0.295195 0.427683 0.043 Uiso 1 1 calc R U . . .
C40 C 0.29806(13) 0.3041(3) 0.32744(10) 0.0363(6) Uani 1 1 d . . . . .
C41 C 0.30785(14) 0.4086(3) 0.29653(10) 0.0372(6) Uani 1 1 d . . . . .
H41 H 0.280658 0.483938 0.288772 0.045 Uiso 1 1 calc R U . . .
C42 C 0.35799(14) 0.4018(3) 0.27702(11) 0.0406(7) Uani 1 1 d . . . . .
H42 H 0.364506 0.472865 0.255628 0.049 Uiso 1 1 calc R U . . .
C43 C 0.39837(15) 0.2941(4) 0.28807(11) 0.0438(7) Uani 1 1 d . . . . .
C44 C 0.38811(18) 0.1907(4) 0.31966(14) 0.0544(9) Uani 1 1 d . . . . .
H44 H 0.415630 0.116141 0.327993 0.065 Uiso 1 1 calc R U . . .
C45 C 0.33787(17) 0.1961(4) 0.33901(13) 0.0491(8) Uani 1 1 d . . . . .
H45 H 0.331075 0.124930 0.360268 0.059 Uiso 1 1 calc R U . . .
C46 C 0.45269(16) 0.2898(4) 0.26534(14) 0.0546(9) Uani 1 1 d . . . . .
C47 C 0.4304(2) 0.2935(7) 0.20934(16) 0.0829(15) Uani 1 1 d . . . . .
H47A H 0.406756 0.210538 0.197801 0.124 Uiso 1 1 calc R U . . .
H47B H 0.465073 0.297358 0.194793 0.124 Uiso 1 1 calc R U . . .
H47C H 0.405145 0.375129 0.199339 0.124 Uiso 1 1 calc R U . . .
C48 C 0.4923(2) 0.4166(6) 0.28228(19) 0.0798(14) Uani 1 1 d . . . . .
H48A H 0.469270 0.500043 0.270127 0.120 Uiso 1 1 calc R U . . .
H48B H 0.527989 0.412094 0.269085 0.120 Uiso 1 1 calc R U . . .
H48C H 0.504915 0.418680 0.318457 0.120 Uiso 1 1 calc R U . . .
C49 C 0.4904(3) 0.1615(6) 0.2804(3) 0.103(2) Uani 1 1 d . . . . .
H49A H 0.504856 0.158218 0.316507 0.155 Uiso 1 1 calc R U . . .
H49B H 0.525046 0.163398 0.265801 0.155 Uiso 1 1 calc R U . . .
H49C H 0.465852 0.079856 0.268716 0.155 Uiso 1 1 calc R U . . .
C50 C 0.30860(13) 0.5664(3) 0.40701(10) 0.0331(6) Uani 1 1 d . . . . .
C51 C 0.29494(16) 0.6776(3) 0.37514(11) 0.0427(7) Uani 1 1 d . . . . .
H51 H 0.255490 0.715774 0.367371 0.051 Uiso 1 1 calc R U . . .
C52 C 0.33900(19) 0.7338(4) 0.35438(12) 0.0508(9) Uani 1 1 d . . . . .
H52 H 0.328778 0.809282 0.332251 0.061 Uiso 1 1 calc R U . . .
C53 C 0.39632(18) 0.6830(4) 0.36510(13) 0.0510(9) Uani 1 1 d . . . . .
C54 C 0.41115(16) 0.5736(4) 0.39799(12) 0.0473(8) Uani 1 1 d . . . . .
H54 H 0.451089 0.538110 0.406386 0.057 Uiso 1 1 calc R U . . .
C55 C 0.36735(14) 0.5157(3) 0.41869(11) 0.0399(7) Uani 1 1 d . . . . .
H55 H 0.377797 0.440758 0.441040 0.048 Uiso 1 1 calc R U . . .
C56 C 0.4426(2) 0.7432(5) 0.34024(17) 0.0732(13) Uani 1 1 d . . . . .
H56A H 0.452358 0.837649 0.351898 0.110 Uiso 1 1 calc R U . . .
H56B H 0.425972 0.743716 0.304345 0.110 Uiso 1 1 calc R U . . .
H56C H 0.479357 0.687084 0.348519 0.110 Uiso 1 1 calc R U . . .
N2 N 0.29508(12) 0.6204(3) 0.50662(9) 0.0354(5) Uani 1 1 d . . . . .
H2 H 0.2918(16) 0.683(4) 0.4867(13) 0.039(9) Uiso 1 1 d . . . . .
O4 O 0.28932(11) 0.3891(2) 0.51063(8) 0.0431(5) Uani 1 1 d . . . . .
O5 O 0.19159(10) 0.4040(3) 0.32143(8) 0.0520(6) Uani 1 1 d . . . . .
O6 O 0.21158(12) 0.1624(3) 0.34617(9) 0.0535(6) Uani 1 1 d . . . . .
S2 S 0.23189(3) 0.30274(8) 0.34840(3) 0.03985(17) Uani 1 1 d . . . . .
C57 C 0.27691(15) 0.9784(3) 0.10561(11) 0.0385(7) Uani 1 1 d . . . . .
C58 C 0.24310(15) 0.9664(3) 0.04998(11) 0.0385(7) Uani 1 1 d . . . . .
C59 C 0.19869(14) 1.1088(3) -0.02287(12) 0.0399(7) Uani 1 1 d . . . . .
C60 C 0.21436(17) 1.0323(4) -0.05998(13) 0.0505(8) Uani 1 1 d . . . . .
H60 H 0.241831 0.957681 -0.051657 0.061 Uiso 1 1 calc R U . . .
C61 C 0.18975(19) 1.0658(5) -0.10875(14) 0.0605(10) Uani 1 1 d . . . . .
H61 H 0.200562 1.012361 -0.133620 0.073 Uiso 1 1 calc R U . . .
C62 C 0.14995(17) 1.1741(5) -0.12304(14) 0.0606(10) Uani 1 1 d . . . . .
C63 C 0.13538(16) 1.2497(4) -0.08569(14) 0.0543(9) Uani 1 1 d . . . . .
H63 H 0.108381 1.325140 -0.094316 0.065 Uiso 1 1 calc R U . . .
C64 C 0.15868(15) 1.2193(3) -0.03657(13) 0.0459(8) Uani 1 1 d . . . . .
H64 H 0.147637 1.273171 -0.011915 0.055 Uiso 1 1 calc R U . . .
C65 C 0.1224(2) 1.2063(7) -0.17673(16) 0.0854(16) Uani 1 1 d . . . . .
H65A H 0.087795 1.145684 -0.189457 0.128 Uiso 1 1 calc R U . . .
H65B H 0.152570 1.191593 -0.195619 0.128 Uiso 1 1 calc R U . . .
H65C H 0.109104 1.302402 -0.180029 0.128 Uiso 1 1 calc R U . . .
C66 C 0.33622(16) 1.0549(4) 0.10748(13) 0.0466(8) Uani 1 1 d . . . . .
H66A H 0.361032 1.057118 0.141602 0.070 Uiso 1 1 calc R U . . .
H66B H 0.327245 1.149260 0.095463 0.070 Uiso 1 1 calc R U . . .
H66C H 0.358167 1.007102 0.086553 0.070 Uiso 1 1 calc R U . . .
C67 C 0.29081(16) 0.8293(3) 0.12419(11) 0.0428(7) Uani 1 1 d . . . . .
H67A H 0.319739 0.789890 0.106953 0.051 Uiso 1 1 calc R U . . .
H67B H 0.253033 0.775462 0.113693 0.051 Uiso 1 1 calc R U . . .
C68 C 0.25756(15) 0.7960(4) 0.21487(11) 0.0421(7) Uani 1 1 d . . . . .
C69 C 0.21816(18) 0.6863(4) 0.20336(13) 0.0516(9) Uani 1 1 d . . . . .
H69 H 0.225344 0.614577 0.182494 0.062 Uiso 1 1 calc R U . . .
C70 C 0.16817(18) 0.6820(4) 0.22248(13) 0.0517(8) Uani 1 1 d . . . . .
H70 H 0.140591 0.607587 0.213914 0.062 Uiso 1 1 calc R U . . .
C71 C 0.15729(15) 0.7849(3) 0.25422(11) 0.0427(7) Uani 1 1 d . . . . .
C72 C 0.19869(15) 0.8919(4) 0.26598(11) 0.0445(7) Uani 1 1 d . . . . .
H72 H 0.192721 0.961983 0.287964 0.053 Uiso 1 1 calc R U . . .
C73 C 0.24858(15) 0.8990(4) 0.24637(11) 0.0449(7) Uani 1 1 d . . . . .
H73 H 0.276150 0.973509 0.254505 0.054 Uiso 1 1 calc R U . . .
C74 C 0.09970(16) 0.7830(4) 0.27314(12) 0.0488(8) Uani 1 1 d . . . . .
C75 C 0.0765(2) 0.6363(5) 0.27570(17) 0.0653(11) Uani 1 1 d . . . . .
H75A H 0.062138 0.599355 0.242180 0.098 Uiso 1 1 calc R U . . .
H75B H 0.043200 0.637312 0.291858 0.098 Uiso 1 1 calc R U . . .
H75C H 0.109209 0.578371 0.294693 0.098 Uiso 1 1 calc R U . . .
C76 C 0.11122(18) 0.8472(4) 0.32464(13) 0.0583(10) Uani 1 1 d . . . . .
H76A H 0.143519 0.796617 0.347562 0.087 Uiso 1 1 calc R U . . .
H76B H 0.074287 0.842526 0.336165 0.087 Uiso 1 1 calc R U . . .
H76C H 0.123231 0.943616 0.323164 0.087 Uiso 1 1 calc R U . . .
C77 C 0.05146(19) 0.8694(5) 0.23691(15) 0.0648(11) Uani 1 1 d . . . . .
H77A H 0.065647 0.964535 0.236684 0.097 Uiso 1 1 calc R U . . .
H77B H 0.013811 0.868077 0.247460 0.097 Uiso 1 1 calc R U . . .
H77C H 0.044331 0.830517 0.203614 0.097 Uiso 1 1 calc R U . . .
C78 C 0.23607(15) 1.0519(3) 0.13339(11) 0.0398(7) Uani 1 1 d . . . . .
C79 C 0.25507(16) 1.1648(3) 0.16382(12) 0.0470(8) Uani 1 1 d . . . . .
H79 H 0.294133 1.202359 0.166884 0.056 Uiso 1 1 calc R U . . .
C80 C 0.21658(18) 1.2232(4) 0.18996(13) 0.0527(9) Uani 1 1 d . . . . .
H80 H 0.230390 1.300156 0.210710 0.063 Uiso 1 1 calc R U . . .
C81 C 0.15942(17) 1.1733(4) 0.18670(12) 0.0483(8) Uani 1 1 d . . . . .
C82 C 0.14022(16) 1.0614(4) 0.15500(11) 0.0449(7) Uani 1 1 d . . . . .
H82 H 0.100692 1.025665 0.151097 0.054 Uiso 1 1 calc R U . . .
C83 C 0.17819(15) 1.0021(3) 0.12928(11) 0.0425(7) Uani 1 1 d . . . . .
H83 H 0.164271 0.925641 0.108336 0.051 Uiso 1 1 calc R U . . .
C84 C 0.1197(2) 1.2327(4) 0.21646(14) 0.0625(11) Uani 1 1 d . . . . .
H84A H 0.129598 1.190577 0.249354 0.094 Uiso 1 1 calc R U . . .
H84B H 0.077410 1.214091 0.199864 0.094 Uiso 1 1 calc R U . . .
H84C H 0.126151 1.332360 0.219650 0.094 Uiso 1 1 calc R U . . .
N3 N 0.22450(14) 1.0865(3) 0.02749(10) 0.0428(6) Uani 1 1 d . . . . .
H3 H 0.2276(18) 1.150(4) 0.0458(15) 0.051(11) Uiso 1 1 d . . . . .
O7 O 0.23547(13) 0.8564(2) 0.02794(8) 0.0525(6) Uani 1 1 d . . . . .
O8 O 0.34583(13) 0.6651(3) 0.19343(10) 0.0654(8) Uani 1 1 d . . . . .
O9 O 0.35911(11) 0.9139(3) 0.21170(9) 0.0607(7) Uani 1 1 d . . . . .
S3 S 0.32101(4) 0.80188(9) 0.18962(3) 0.0482(2) Uani 1 1 d . . . . .
C85 C 0.29694(15) 0.5044(3) 0.00624(11) 0.0385(6) Uani 1 1 d . . . . .
C86 C 0.25300(14) 0.4690(3) 0.03886(11) 0.0347(6) Uani 1 1 d . . . . .
C87 C 0.16452(15) 0.5638(3) 0.06396(12) 0.0435(7) Uani 1 1 d . . . . .
C88 C 0.15150(16) 0.4522(4) 0.09020(14) 0.0528(9) Uani 1 1 d . . . . .
H88 H 0.177046 0.373647 0.095474 0.063 Uiso 1 1 calc R U . . .
C89 C 0.10054(18) 0.4559(5) 0.10883(15) 0.0593(10) Uani 1 1 d . . . . .
H89 H 0.091810 0.378476 0.126559 0.071 Uiso 1 1 calc R U . . .
C90 C 0.06256(17) 0.5672(4) 0.10254(14) 0.0562(9) Uani 1 1 d . . . . .
C91 C 0.07740(17) 0.6798(4) 0.07724(15) 0.0606(10) Uani 1 1 d . . . . .
H91 H 0.052774 0.759737 0.073343 0.073 Uiso 1 1 calc R U . . .
C92 C 0.12662(16) 0.6784(4) 0.05781(14) 0.0508(8) Uani 1 1 d . . . . .
H92 H 0.134991 0.756021 0.039996 0.061 Uiso 1 1 calc R U . . .
C93 C 0.00729(19) 0.5667(6) 0.12274(18) 0.0773(13) Uani 1 1 d . . . . .
H93A H -0.025528 0.517547 0.099810 0.116 Uiso 1 1 calc R U . . .
H93B H -0.005198 0.661646 0.126575 0.116 Uiso 1 1 calc R U . . .
H93C H 0.016755 0.520488 0.154929 0.116 Uiso 1 1 calc R U . . .
C94 C 0.26283(17) 0.5800(4) -0.04093(12) 0.0468(8) Uani 1 1 d . . . . .
H94A H 0.227024 0.526810 -0.057353 0.070 Uiso 1 1 calc R U . . .
H94B H 0.289278 0.590159 -0.063289 0.070 Uiso 1 1 calc R U . . .
H94C H 0.250460 0.671195 -0.032167 0.070 Uiso 1 1 calc R U . . .
C95 C 0.31683(15) 0.3619(3) -0.00950(12) 0.0407(7) Uani 1 1 d . . . . .
H95A H 0.281398 0.319916 -0.032725 0.049 Uiso 1 1 calc R U . . .
H95B H 0.327001 0.302725 0.020276 0.049 Uiso 1 1 calc R U . . .
C96 C 0.44417(15) 0.3514(3) 0.01156(12) 0.0417(7) Uani 1 1 d . . . . .
C97 C 0.45714(18) 0.2365(4) 0.04115(13) 0.0484(8) Uani 1 1 d . . . . .
H97 H 0.431017 0.159051 0.034922 0.058 Uiso 1 1 calc R U . . .
C98 C 0.50831(18) 0.2344(4) 0.07994(13) 0.0507(8) Uani 1 1 d . . . . .
H98 H 0.516797 0.155110 0.100419 0.061 Uiso 1 1 calc R U . . .
C99 C 0.54770(16) 0.3460(4) 0.08966(11) 0.0444(7) Uani 1 1 d . . . . .
C100 C 0.53356(15) 0.4605(4) 0.05870(12) 0.0427(7) Uani 1 1 d . . . . .
H100 H 0.559868 0.537683 0.064420 0.051 Uiso 1 1 calc R U . . .
C101 C 0.48242(15) 0.4645(3) 0.02007(11) 0.0400(7) Uani 1 1 d . . . . .
H101 H 0.473487 0.543606 -0.000449 0.048 Uiso 1 1 calc R U . . .
C102 C 0.60440(17) 0.3477(4) 0.13265(12) 0.0502(8) Uani 1 1 d . . . . .
C103 C 0.6126(2) 0.2115(5) 0.16085(14) 0.0714(13) Uani 1 1 d . . . . .
H10D H 0.577989 0.195897 0.174808 0.107 Uiso 1 1 calc R U . . .
H10E H 0.649648 0.214981 0.187592 0.107 Uiso 1 1 calc R U . . .
H10F H 0.615373 0.136115 0.138244 0.107 Uiso 1 1 calc R U . . .
C104 C 0.66033(17) 0.3772(6) 0.11368(14) 0.0711(13) Uani 1 1 d . . . . .
H10G H 0.664511 0.305661 0.090088 0.107 Uiso 1 1 calc R U . . .
H10H H 0.696257 0.377710 0.141540 0.107 Uiso 1 1 calc R U . . .
H10I H 0.655962 0.467162 0.097301 0.107 Uiso 1 1 calc R U . . .
C105 C 0.5978(2) 0.4648(4) 0.16843(13) 0.0602(10) Uani 1 1 d . . . . .
H10J H 0.593798 0.553090 0.150989 0.090 Uiso 1 1 calc R U . . .
H10K H 0.633514 0.466847 0.196435 0.090 Uiso 1 1 calc R U . . .
H10L H 0.561785 0.448445 0.180521 0.090 Uiso 1 1 calc R U . . .
C106 C 0.34964(14) 0.5857(3) 0.03831(11) 0.0369(6) Uani 1 1 d . . . . .
C107 C 0.37841(14) 0.5422(3) 0.08540(11) 0.0368(6) Uani 1 1 d . . . . .
H107 H 0.365348 0.460107 0.097990 0.044 Uiso 1 1 calc R U . . .
C108 C 0.42593(15) 0.6160(3) 0.11456(12) 0.0418(7) Uani 1 1 d . . . . .
H108 H 0.444893 0.583772 0.146808 0.050 Uiso 1 1 calc R U . . .
C109 C 0.44637(16) 0.7364(4) 0.09752(13) 0.0460(8) Uani 1 1 d . . . . .
C110 C 0.41843(16) 0.7787(3) 0.05047(13) 0.0482(8) Uani 1 1 d . . . . .
H110 H 0.432190 0.859806 0.037803 0.058 Uiso 1 1 calc R U . . .
C111 C 0.37047(17) 0.7057(3) 0.02089(12) 0.0445(7) Uani 1 1 d . . . . .
H111 H 0.351777 0.737894 -0.011419 0.053 Uiso 1 1 calc R U . . .
C112 C 0.49770(18) 0.8175(5) 0.12990(17) 0.0661(11) Uani 1 1 d . . . . .
H11C H 0.481457 0.896516 0.144100 0.099 Uiso 1 1 calc R U . . .
H11D H 0.524519 0.850185 0.110025 0.099 Uiso 1 1 calc R U . . .
H11E H 0.520412 0.758410 0.156564 0.099 Uiso 1 1 calc R U . . .
N4 N 0.21378(13) 0.5702(3) 0.04178(11) 0.0436(6) Uani 1 1 d . . . . .
H4 H 0.219(2) 0.649(5) 0.0284(17) 0.070(13) Uiso 1 1 d . . . . .
O10 O 0.25458(10) 0.3591(2) 0.05976(8) 0.0418(5) Uani 1 1 d . . . . .
O11 O 0.38018(11) 0.4740(3) -0.06743(8) 0.0521(6) Uani 1 1 d . . . . .
O12 O 0.37287(12) 0.2208(3) -0.06120(9) 0.0577(7) Uani 1 1 d . . . . .
S4 S 0.37842(4) 0.35386(9) -0.03761(3) 0.04290(18) Uani 1 1 d . . . . .
 
loop_
 _atom_site_aniso_label
 _atom_site_aniso_U_11
 _atom_site_aniso_U_22
 _atom_site_aniso_U_33
 _atom_site_aniso_U_23
 _atom_site_aniso_U_13
 _atom_site_aniso_U_12
C1 0.0325(14) 0.0282(14) 0.0377(14) 0.0018(11) 0.0144(11) -0.0009(11)
C2 0.0310(14) 0.0262(13) 0.0349(14) 0.0036(11) 0.0088(11) 0.0022(11)
C3 0.0291(14) 0.0307(14) 0.0415(15) 0.0060(12) 0.0100(11) 0.0005(11)
C4 0.0375(17) 0.0385(17) 0.063(2) -0.0044(15) 0.0133(15) -0.0058(14)
C5 0.0319(16) 0.050(2) 0.069(2) 0.0004(17) 0.0120(15) -0.0110(14)
C6 0.0349(16) 0.055(2) 0.0467(17) 0.0120(15) 0.0141(13) -0.0028(14)
C7 0.0383(17) 0.052(2) 0.0518(18) 0.0026(16) 0.0206(14) 0.0030(15)
C8 0.0346(15) 0.0368(16) 0.0464(16) -0.0008(13) 0.0161(13) -0.0041(12)
C9 0.0389(19) 0.085(3) 0.074(2) 0.007(2) 0.0249(18) -0.0061(19)
C10 0.0386(16) 0.0398(16) 0.0405(15) -0.0029(13) 0.0129(13) 0.0004(13)
C11 0.0343(14) 0.0296(14) 0.0439(15) 0.0072(12) 0.0158(12) 0.0013(12)
C12 0.0292(14) 0.0398(16) 0.0473(16) 0.0045(13) 0.0193(12) -0.0041(13)
C13 0.0361(15) 0.0380(16) 0.0488(17) -0.0009(13) 0.0221(13) -0.0011(13)
C14 0.0324(15) 0.0372(16) 0.0551(18) 0.0068(14) 0.0210(13) 0.0026(13)
C15 0.0385(15) 0.0412(17) 0.0447(16) 0.0043(14) 0.0203(13) 0.0005(13)
C16 0.0535(19) 0.0334(17) 0.0527(18) -0.0033(13) 0.0192(15) -0.0016(14)
C17 0.0445(17) 0.0374(17) 0.0509(18) 0.0022(14) 0.0179(14) 0.0026(14)
C18 0.0460(18) 0.056(2) 0.0464(17) 0.0033(16) 0.0192(14) 0.0007(16)
C19 0.061(2) 0.080(3) 0.056(2) 0.019(2) 0.0177(18) -0.003(2)
C20 0.070(3) 0.073(3) 0.049(2) -0.0091(19) 0.0100(18) -0.003(2)
C21 0.0384(18) 0.100(3) 0.050(2) -0.001(2) 0.0118(15) -0.005(2)
C22 0.0315(14) 0.0289(13) 0.0372(14) 0.0019(11) 0.0163(11) -0.0020(11)
C23 0.0423(17) 0.0321(15) 0.0431(16) -0.0028(12) 0.0180(13) 0.0032(13)
C24 0.0425(16) 0.0368(17) 0.0563(19) 0.0006(14) 0.0245(14) 0.0081(14)
C25 0.0327(14) 0.0376(16) 0.0500(17) 0.0100(13) 0.0178(13) 0.0046(13)
C26 0.0381(16) 0.0433(17) 0.0364(15) 0.0009(13) 0.0149(12) 0.0010(13)
C27 0.0322(14) 0.0301(14) 0.0432(15) -0.0002(12) 0.0173(12) 0.0003(11)
C28 0.053(2) 0.049(2) 0.066(2) 0.0116(18) 0.0148(17) 0.0154(17)
N1 0.0350(13) 0.0251(13) 0.0509(15) -0.0046(11) 0.0196(11) -0.0014(10)
O1 0.0344(10) 0.0266(10) 0.0477(11) -0.0040(9) 0.0171(8) -0.0017(8)
O2 0.0453(13) 0.0547(15) 0.0580(14) 0.0222(11) 0.0181(11) -0.0065(11)
O3 0.0434(12) 0.0584(14) 0.0424(11) -0.0036(10) 0.0212(10) -0.0009(11)
S1 0.0343(3) 0.0424(4) 0.0431(4) 0.0074(3) 0.0177(3) -0.0019(3)
C29 0.0346(15) 0.0281(14) 0.0370(14) -0.0050(12) 0.0096(11) -0.0025(12)
C30 0.0341(14) 0.0254(13) 0.0384(14) -0.0009(11) 0.0153(11) 0.0006(11)
C31 0.0339(15) 0.0353(15) 0.0339(14) -0.0019(12) 0.0090(11) 0.0072(12)
C32 0.0361(15) 0.0404(17) 0.0410(16) -0.0064(13) 0.0071(12) 0.0065(13)
C33 0.0404(17) 0.067(2) 0.0466(18) -0.0192(18) 0.0013(14) 0.0023(17)
C34 0.055(2) 0.104(3) 0.0388(18) -0.018(2) 0.0101(16) 0.008(2)
C35 0.060(2) 0.088(3) 0.0374(17) -0.0020(18) 0.0187(16) 0.004(2)
C36 0.0516(19) 0.0493(19) 0.0412(16) -0.0032(14) 0.0183(14) 0.0005(15)
C37 0.087(3) 0.196(7) 0.045(2) -0.037(3) 0.020(2) -0.008(4)
C38 0.0377(16) 0.0406(17) 0.0439(16) -0.0031(14) 0.0049(13) 0.0002(13)
C39 0.0466(16) 0.0301(14) 0.0361(14) -0.0048(12) 0.0200(13) -0.0037(12)
C40 0.0416(15) 0.0391(15) 0.0295(13) -0.0032(12) 0.0117(12) -0.0020(13)
C41 0.0402(15) 0.0377(15) 0.0335(14) 0.0000(12) 0.0090(12) -0.0022(13)
C42 0.0473(17) 0.0446(17) 0.0310(14) 0.0026(13) 0.0118(12) -0.0037(15)
C43 0.0453(17) 0.0493(18) 0.0392(15) 0.0005(14) 0.0153(13) -0.0011(15)
C44 0.058(2) 0.050(2) 0.061(2) 0.0116(17) 0.0267(18) 0.0152(17)
C45 0.058(2) 0.0467(19) 0.0478(18) 0.0152(15) 0.0238(16) 0.0073(16)
C46 0.0455(18) 0.064(2) 0.060(2) -0.0035(18) 0.0248(16) -0.0023(18)
C47 0.063(2) 0.135(4) 0.062(2) -0.037(3) 0.035(2) -0.022(3)
C48 0.054(2) 0.100(4) 0.089(3) -0.027(3) 0.024(2) -0.022(2)
C49 0.089(4) 0.091(4) 0.158(6) 0.017(4) 0.082(4) 0.027(3)
C50 0.0383(15) 0.0307(14) 0.0300(13) -0.0024(11) 0.0080(11) -0.0059(12)
C51 0.0524(19) 0.0361(16) 0.0373(16) -0.0020(13) 0.0073(14) -0.0064(14)
C52 0.073(3) 0.0409(18) 0.0389(17) 0.0063(14) 0.0145(16) -0.0160(17)
C53 0.066(2) 0.0504(19) 0.0436(17) -0.0102(15) 0.0267(16) -0.0240(18)
C54 0.0453(18) 0.0524(19) 0.0471(17) -0.0074(15) 0.0175(14) -0.0135(15)
C55 0.0406(16) 0.0410(17) 0.0389(15) 0.0007(13) 0.0113(13) -0.0038(13)
C56 0.097(3) 0.065(3) 0.074(3) -0.006(2) 0.052(2) -0.033(2)
N2 0.0506(15) 0.0262(12) 0.0304(12) -0.0004(10) 0.0122(11) 0.0013(11)
O4 0.0632(14) 0.0270(11) 0.0405(11) 0.0002(9) 0.0155(10) 0.0024(10)
O5 0.0407(12) 0.0710(16) 0.0414(12) -0.0115(11) 0.0050(9) 0.0029(12)
O6 0.0667(16) 0.0479(13) 0.0556(14) -0.0233(11) 0.0331(12) -0.0241(12)
S2 0.0424(4) 0.0424(4) 0.0372(4) -0.0106(3) 0.0145(3) -0.0088(3)
C57 0.0482(18) 0.0265(15) 0.0408(16) 0.0013(12) 0.0111(13) 0.0052(13)
C58 0.0522(18) 0.0239(14) 0.0413(16) 0.0028(12) 0.0156(14) 0.0020(13)
C59 0.0440(17) 0.0299(15) 0.0441(16) 0.0054(13) 0.0077(13) -0.0069(13)
C60 0.054(2) 0.054(2) 0.0460(18) 0.0048(15) 0.0170(15) 0.0029(16)
C61 0.067(2) 0.075(3) 0.0439(18) 0.0056(18) 0.0221(17) -0.003(2)
C62 0.047(2) 0.084(3) 0.049(2) 0.016(2) 0.0078(16) -0.013(2)
C63 0.0412(19) 0.055(2) 0.062(2) 0.0150(18) 0.0041(16) -0.0029(16)
C64 0.0466(19) 0.0401(17) 0.0488(18) 0.0025(14) 0.0081(15) 0.0007(14)
C65 0.077(3) 0.127(5) 0.051(2) 0.027(3) 0.013(2) 0.000(3)
C66 0.0511(19) 0.0405(18) 0.0478(18) 0.0011(14) 0.0117(15) 0.0005(15)
C67 0.060(2) 0.0337(17) 0.0384(15) 0.0053(12) 0.0192(14) 0.0124(14)
C68 0.0489(17) 0.0446(17) 0.0352(14) 0.0046(14) 0.0152(13) 0.0126(15)
C69 0.073(2) 0.0408(18) 0.0479(18) -0.0050(15) 0.0283(17) 0.0094(17)
C70 0.069(2) 0.0400(18) 0.0512(19) -0.0074(15) 0.0244(17) 0.0012(17)
C71 0.0530(18) 0.0429(17) 0.0326(14) -0.0019(13) 0.0118(13) 0.0123(15)
C72 0.0539(19) 0.0445(18) 0.0345(15) -0.0085(14) 0.0099(13) 0.0109(16)
C73 0.0498(18) 0.0494(18) 0.0341(15) -0.0030(14) 0.0078(13) 0.0104(16)
C74 0.0528(19) 0.050(2) 0.0448(17) -0.0012(15) 0.0144(15) 0.0157(16)
C75 0.062(2) 0.065(3) 0.076(3) -0.004(2) 0.031(2) 0.003(2)
C76 0.066(2) 0.069(2) 0.0468(18) -0.0078(17) 0.0271(17) 0.0156(19)
C77 0.059(2) 0.079(3) 0.059(2) 0.014(2) 0.0194(18) 0.019(2)
C78 0.0473(18) 0.0336(15) 0.0343(15) 0.0004(12) 0.0025(13) 0.0106(13)
C79 0.0492(19) 0.0382(17) 0.0481(18) -0.0054(14) 0.0023(15) 0.0070(14)
C80 0.065(2) 0.0409(18) 0.0444(18) -0.0144(15) -0.0011(16) 0.0134(16)
C81 0.060(2) 0.0451(18) 0.0348(15) -0.0057(14) 0.0022(14) 0.0199(16)
C82 0.0487(18) 0.0493(18) 0.0329(15) -0.0066(14) 0.0032(13) 0.0131(15)
C83 0.0543(19) 0.0354(16) 0.0347(15) -0.0056(13) 0.0056(13) 0.0085(14)
C84 0.077(3) 0.061(2) 0.049(2) -0.0138(18) 0.0146(18) 0.024(2)
N3 0.0636(18) 0.0240(13) 0.0389(14) -0.0015(11) 0.0094(12) 0.0014(12)
O7 0.0847(18) 0.0251(10) 0.0440(12) -0.0006(9) 0.0096(12) 0.0012(11)
O8 0.0812(19) 0.0680(17) 0.0585(15) 0.0288(13) 0.0388(14) 0.0432(15)
O9 0.0482(14) 0.0835(19) 0.0472(13) 0.0075(13) 0.0061(11) 0.0061(14)
S3 0.0549(5) 0.0530(5) 0.0401(4) 0.0115(4) 0.0181(3) 0.0217(4)
C85 0.0463(17) 0.0270(14) 0.0438(16) -0.0011(12) 0.0144(13) -0.0019(13)
C86 0.0391(16) 0.0257(14) 0.0386(15) -0.0039(12) 0.0084(12) -0.0007(12)
C87 0.0399(17) 0.0380(16) 0.0527(18) -0.0057(14) 0.0117(14) 0.0065(14)
C88 0.0475(19) 0.0471(19) 0.069(2) 0.0084(17) 0.0237(17) 0.0152(16)
C89 0.052(2) 0.067(2) 0.063(2) 0.0076(19) 0.0246(18) 0.0124(18)
C90 0.0431(19) 0.068(2) 0.058(2) -0.0105(19) 0.0137(16) 0.0124(18)
C91 0.046(2) 0.055(2) 0.075(3) -0.019(2) 0.0043(18) 0.0213(18)
C92 0.050(2) 0.0346(17) 0.067(2) -0.0044(16) 0.0125(17) 0.0106(15)
C93 0.050(2) 0.102(4) 0.084(3) -0.015(3) 0.025(2) 0.020(2)
C94 0.060(2) 0.0385(17) 0.0415(16) 0.0006(14) 0.0125(15) 0.0018(15)
C95 0.0459(17) 0.0321(15) 0.0484(16) -0.0050(13) 0.0200(14) -0.0004(13)
C96 0.0464(17) 0.0407(16) 0.0445(16) -0.0037(14) 0.0237(14) -0.0005(14)
C97 0.064(2) 0.0378(17) 0.0483(18) 0.0001(15) 0.0229(16) -0.0037(16)
C98 0.071(2) 0.0376(17) 0.0437(18) 0.0047(14) 0.0158(17) 0.0049(17)
C99 0.0548(19) 0.0442(17) 0.0381(15) -0.0010(13) 0.0192(14) 0.0104(15)
C100 0.0471(18) 0.0428(17) 0.0444(17) -0.0015(14) 0.0229(14) -0.0039(14)
C101 0.0475(18) 0.0382(16) 0.0403(16) 0.0041(13) 0.0219(14) 0.0008(13)
C102 0.062(2) 0.054(2) 0.0360(15) -0.0037(15) 0.0149(15) 0.0111(17)
C103 0.104(4) 0.063(3) 0.0386(19) 0.0012(17) 0.002(2) 0.020(2)
C104 0.047(2) 0.120(4) 0.0431(19) -0.003(2) 0.0063(15) 0.014(2)
C105 0.073(3) 0.065(2) 0.0414(18) -0.0091(17) 0.0133(17) 0.007(2)
C106 0.0414(16) 0.0296(14) 0.0429(15) -0.0009(12) 0.0167(13) -0.0008(12)
C107 0.0462(17) 0.0308(15) 0.0393(15) 0.0025(12) 0.0215(13) 0.0005(13)
C108 0.0438(17) 0.0447(17) 0.0410(16) -0.0022(14) 0.0181(13) 0.0008(14)
C109 0.0456(18) 0.0425(17) 0.0539(19) -0.0125(15) 0.0202(15) -0.0046(14)
C110 0.056(2) 0.0371(17) 0.060(2) -0.0034(15) 0.0288(16) -0.0105(15)
C111 0.063(2) 0.0318(16) 0.0426(17) 0.0023(13) 0.0198(15) -0.0053(14)
C112 0.056(2) 0.061(2) 0.082(3) -0.024(2) 0.019(2) -0.0144(19)
N4 0.0511(16) 0.0252(13) 0.0580(16) 0.0041(12) 0.0204(13) 0.0081(12)
O10 0.0487(12) 0.0250(10) 0.0571(13) 0.0021(10) 0.0232(10) 0.0051(9)
O11 0.0558(14) 0.0642(16) 0.0380(11) 0.0045(11) 0.0152(10) -0.0038(12)
O12 0.0641(16) 0.0559(15) 0.0569(15) -0.0214(12) 0.0225(12) 0.0018(12)
S4 0.0471(4) 0.0448(4) 0.0407(4) -0.0061(3) 0.0182(3) -0.0012(3)
 
_geom_special_details
;
 All esds (except the esd in the dihedral angle between two l.s. planes)
 are estimated using the full covariance matrix.  The cell esds are taken
 into account individually in the estimation of esds in distances, angles
 and torsion angles; correlations between esds in cell parameters are only
 used when they are defined by crystal symmetry.  An approximate (isotropic)
 treatment of cell esds is used for estimating esds involving l.s. planes.
;
 
loop_
 _geom_bond_atom_site_label_1
 _geom_bond_atom_site_label_2
 _geom_bond_distance
 _geom_bond_site_symmetry_2
 _geom_bond_publ_flag
C1 C10 1.535(4) . ?
C1 C22 1.538(4) . ?
C1 C11 1.547(4) . ?
C1 C2 1.562(4) . ?
C2 O1 1.224(3) . ?
C2 N1 1.336(4) . ?
C3 C8 1.388(4) . ?
C3 C4 1.395(4) . ?
C3 N1 1.419(4) . ?
C4 C5 1.387(5) . ?
C4 H4A 0.9500 . ?
C5 C6 1.385(5) . ?
C5 H5 0.9500 . ?
C6 C7 1.387(5) . ?
C6 C9 1.505(5) . ?
C7 C8 1.389(4) . ?
C7 H7 0.9500 . ?
C8 H8 0.9500 . ?
C9 H9A 0.9800 . ?
C9 H9B 0.9800 . ?
C9 H9C 0.9800 . ?
C10 H10A 0.9800 . ?
C10 H10B 0.9800 . ?
C10 H10C 0.9800 . ?
C11 S1 1.782(3) . ?
C11 H11A 0.9900 . ?
C11 H11B 0.9900 . ?
C12 C13 1.367(4) . ?
C12 C17 1.390(4) . ?
C12 S1 1.774(3) . ?
C13 C14 1.387(5) . ?
C13 H13 0.9500 . ?
C14 C15 1.401(5) . ?
C14 H14 0.9500 . ?
C15 C16 1.403(5) . ?
C15 C18 1.528(5) . ?
C16 C17 1.376(5) . ?
C16 H16 0.9500 . ?
C17 H17 0.9500 . ?
C18 C21 1.518(5) . ?
C18 C20 1.519(5) . ?
C18 C19 1.541(5) . ?
C19 H19A 0.9800 . ?
C19 H19B 0.9800 . ?
C19 H19C 0.9800 . ?
C20 H20A 0.9800 . ?
C20 H20B 0.9800 . ?
C20 H20C 0.9800 . ?
C21 H21A 0.9800 . ?
C21 H21B 0.9800 . ?
C21 H21C 0.9800 . ?
C22 C27 1.391(4) . ?
C22 C23 1.391(4) . ?
C23 C24 1.387(5) . ?
C23 H23 0.9500 . ?
C24 C25 1.385(5) . ?
C24 H24 0.9500 . ?
C25 C26 1.397(4) . ?
C25 C28 1.508(5) . ?
C26 C27 1.383(4) . ?
C26 H26 0.9500 . ?
C27 H27 0.9500 . ?
C28 H28A 0.9800 . ?
C28 H28B 0.9800 . ?
C28 H28C 0.9800 . ?
N1 H1 0.75(4) . ?
O2 S1 1.444(2) . ?
O3 S1 1.435(2) . ?
C29 C50 1.534(4) . ?
C29 C30 1.537(4) . ?
C29 C38 1.541(4) . ?
C29 C39 1.547(4) . ?
C30 O4 1.228(4) . ?
C30 N2 1.346(4) . ?
C31 C32 1.388(4) . ?
C31 C36 1.388(5) . ?
C31 N2 1.414(4) . ?
C32 C33 1.379(5) . ?
C32 H32 0.9500 . ?
C33 C34 1.377(6) . ?
C33 H33 0.9500 . ?
C34 C35 1.388(6) . ?
C34 C37 1.525(5) . ?
C35 C36 1.384(5) . ?
C35 H35 0.9500 . ?
C36 H36 0.9500 . ?
C37 H37A 0.9800 . ?
C37 H37B 0.9800 . ?
C37 H37C 0.9800 . ?
C38 H38A 0.9800 . ?
C38 H38B 0.9800 . ?
C38 H38C 0.9800 . ?
C39 S2 1.793(3) . ?
C39 H39A 0.9900 . ?
C39 H39B 0.9900 . ?
C40 C45 1.374(5) . ?
C40 C41 1.389(4) . ?
C40 S2 1.759(3) . ?
C41 C42 1.393(4) . ?
C41 H41 0.9500 . ?
C42 C43 1.379(5) . ?
C42 H42 0.9500 . ?
C43 C44 1.397(5) . ?
C43 C46 1.535(4) . ?
C44 C45 1.392(5) . ?
C44 H44 0.9500 . ?
C45 H45 0.9500 . ?
C46 C49 1.515(7) . ?
C46 C47 1.520(6) . ?
C46 C48 1.532(6) . ?
C47 H47A 0.9800 . ?
C47 H47B 0.9800 . ?
C47 H47C 0.9800 . ?
C48 H48A 0.9800 . ?
C48 H48B 0.9800 . ?
C48 H48C 0.9800 . ?
C49 H49A 0.9800 . ?
C49 H49B 0.9800 . ?
C49 H49C 0.9800 . ?
C50 C51 1.385(4) . ?
C50 C55 1.393(4) . ?
C51 C52 1.397(5) . ?
C51 H51 0.9500 . ?
C52 C53 1.364(6) . ?
C52 H52 0.9500 . ?
C53 C54 1.390(5) . ?
C53 C56 1.525(5) . ?
C54 C55 1.397(4) . ?
C54 H54 0.9500 . ?
C55 H55 0.9500 . ?
C56 H56A 0.9800 . ?
C56 H56B 0.9800 . ?
C56 H56C 0.9800 . ?
N2 H2 0.82(4) . ?
O5 S2 1.427(3) . ?
O6 S2 1.437(2) . ?
C57 C78 1.535(4) . ?
C57 C66 1.538(5) . ?
C57 C67 1.545(4) . ?
C57 C58 1.557(4) . ?
C58 O7 1.224(4) . ?
C58 N3 1.343(4) . ?
C59 C60 1.395(5) . ?
C59 N3 1.400(4) . ?
C59 C64 1.401(5) . ?
C60 C61 1.377(5) . ?
C60 H60 0.9500 . ?
C61 C62 1.383(6) . ?
C61 H61 0.9500 . ?
C62 C63 1.386(6) . ?
C62 C65 1.507(5) . ?
C63 C64 1.374(5) . ?
C63 H63 0.9500 . ?
C64 H64 0.9500 . ?
C65 H65A 0.9800 . ?
C65 H65B 0.9800 . ?
C65 H65C 0.9800 . ?
C66 H66A 0.9800 . ?
C66 H66B 0.9800 . ?
C66 H66C 0.9800 . ?
C67 S3 1.805(3) . ?
C67 H67A 0.9900 . ?
C67 H67B 0.9900 . ?
C68 C69 1.381(5) . ?
C68 C73 1.382(4) . ?
C68 S3 1.771(3) . ?
C69 C70 1.382(5) . ?
C69 H69 0.9500 . ?
C70 C71 1.401(4) . ?
C70 H70 0.9500 . ?
C71 C72 1.390(5) . ?
C71 C74 1.541(5) . ?
C72 C73 1.389(5) . ?
C72 H72 0.9500 . ?
C73 H73 0.9500 . ?
C74 C75 1.529(6) . ?
C74 C76 1.530(5) . ?
C74 C77 1.545(5) . ?
C75 H75A 0.9800 . ?
C75 H75B 0.9800 . ?
C75 H75C 0.9800 . ?
C76 H76A 0.9800 . ?
C76 H76B 0.9800 . ?
C76 H76C 0.9800 . ?
C77 H77A 0.9800 . ?
C77 H77B 0.9800 . ?
C77 H77C 0.9800 . ?
C78 C83 1.389(5) . ?
C78 C79 1.389(4) . ?
C79 C80 1.401(5) . ?
C79 H79 0.9500 . ?
C80 C81 1.378(6) . ?
C80 H80 0.9500 . ?
C81 C82 1.402(5) . ?
C81 C84 1.496(5) . ?
C82 C83 1.387(5) . ?
C82 H82 0.9500 . ?
C83 H83 0.9500 . ?
C84 H84A 0.9800 . ?
C84 H84B 0.9800 . ?
C84 H84C 0.9800 . ?
N3 H3 0.79(4) . ?
O8 S3 1.439(3) . ?
O9 S3 1.434(3) . ?
C85 C106 1.529(4) . ?
C85 C94 1.539(5) . ?
C85 C95 1.556(4) . ?
C85 C86 1.559(4) . ?
C86 O10 1.214(4) . ?
C86 N4 1.348(4) . ?
C87 C88 1.384(5) . ?
C87 C92 1.395(5) . ?
C87 N4 1.420(4) . ?
C88 C89 1.394(5) . ?
C88 H88 0.9500 . ?
C89 C90 1.370(5) . ?
C89 H89 0.9500 . ?
C90 C91 1.391(6) . ?
C90 C93 1.512(5) . ?
C91 C92 1.370(6) . ?
C91 H91 0.9500 . ?
C92 H92 0.9500 . ?
C93 H93A 0.9800 . ?
C93 H93B 0.9800 . ?
C93 H93C 0.9800 . ?
C94 H94A 0.9800 . ?
C94 H94B 0.9800 . ?
C94 H94C 0.9800 . ?
C95 S4 1.783(3) . ?
C95 H95A 0.9900 . ?
C95 H95B 0.9900 . ?
C96 C97 1.376(5) . ?
C96 C101 1.388(5) . ?
C96 S4 1.765(4) . ?
C97 C98 1.382(5) . ?
C97 H97 0.9500 . ?
C98 C99 1.393(5) . ?
C98 H98 0.9500 . ?
C99 C100 1.397(5) . ?
C99 C102 1.531(5) . ?
C100 C101 1.379(5) . ?
C100 H100 0.9500 . ?
C101 H101 0.9500 . ?
C102 C103 1.528(5) . ?
C102 C104 1.533(5) . ?
C102 C105 1.548(5) . ?
C103 H10D 0.9800 . ?
C103 H10E 0.9800 . ?
C103 H10F 0.9800 . ?
C104 H10G 0.9800 . ?
C104 H10H 0.9800 . ?
C104 H10I 0.9800 . ?
C105 H10J 0.9800 . ?
C105 H10K 0.9800 . ?
C105 H10L 0.9800 . ?
C106 C107 1.382(4) . ?
C106 C111 1.394(4) . ?
C107 C108 1.384(5) . ?
C107 H107 0.9500 . ?
C108 C109 1.388(5) . ?
C108 H108 0.9500 . ?
C109 C110 1.373(5) . ?
C109 C112 1.512(5) . ?
C110 C111 1.391(5) . ?
C110 H110 0.9500 . ?
C111 H111 0.9500 . ?
C112 H11C 0.9800 . ?
C112 H11D 0.9800 . ?
C112 H11E 0.9800 . ?
N4 H4 0.88(5) . ?
O11 S4 1.442(3) . ?
O12 S4 1.442(3) . ?
 
loop_
 _geom_angle_atom_site_label_1
 _geom_angle_atom_site_label_2
 _geom_angle_atom_site_label_3
 _geom_angle
 _geom_angle_site_symmetry_1
 _geom_angle_site_symmetry_3
 _geom_angle_publ_flag
C10 C1 C22 113.1(2) . . ?
C10 C1 C11 108.2(2) . . ?
C22 C1 C11 112.1(2) . . ?
C10 C1 C2 110.8(2) . . ?
C22 C1 C2 107.8(2) . . ?
C11 C1 C2 104.5(2) . . ?
O1 C2 N1 123.7(3) . . ?
O1 C2 C1 121.3(2) . . ?
N1 C2 C1 115.0(2) . . ?
C8 C3 C4 119.1(3) . . ?
C8 C3 N1 124.2(3) . . ?
C4 C3 N1 116.7(3) . . ?
C5 C4 C3 120.4(3) . . ?
C5 C4 H4A 119.8 . . ?
C3 C4 H4A 119.8 . . ?
C6 C5 C4 121.5(3) . . ?
C6 C5 H5 119.3 . . ?
C4 C5 H5 119.3 . . ?
C5 C6 C7 117.2(3) . . ?
C5 C6 C9 121.6(3) . . ?
C7 C6 C9 121.3(3) . . ?
C6 C7 C8 122.7(3) . . ?
C6 C7 H7 118.6 . . ?
C8 C7 H7 118.6 . . ?
C3 C8 C7 119.2(3) . . ?
C3 C8 H8 120.4 . . ?
C7 C8 H8 120.4 . . ?
C6 C9 H9A 109.5 . . ?
C6 C9 H9B 109.5 . . ?
H9A C9 H9B 109.5 . . ?
C6 C9 H9C 109.5 . . ?
H9A C9 H9C 109.5 . . ?
H9B C9 H9C 109.5 . . ?
C1 C10 H10A 109.5 . . ?
C1 C10 H10B 109.5 . . ?
H10A C10 H10B 109.5 . . ?
C1 C10 H10C 109.5 . . ?
H10A C10 H10C 109.5 . . ?
H10B C10 H10C 109.5 . . ?
C1 C11 S1 119.4(2) . . ?
C1 C11 H11A 107.5 . . ?
S1 C11 H11A 107.5 . . ?
C1 C11 H11B 107.5 . . ?
S1 C11 H11B 107.5 . . ?
H11A C11 H11B 107.0 . . ?
C13 C12 C17 120.6(3) . . ?
C13 C12 S1 120.0(2) . . ?
C17 C12 S1 119.4(2) . . ?
C12 C13 C14 119.7(3) . . ?
C12 C13 H13 120.2 . . ?
C14 C13 H13 120.2 . . ?
C13 C14 C15 121.2(3) . . ?
C13 C14 H14 119.4 . . ?
C15 C14 H14 119.4 . . ?
C14 C15 C16 117.6(3) . . ?
C14 C15 C18 119.4(3) . . ?
C16 C15 C18 123.0(3) . . ?
C17 C16 C15 121.0(3) . . ?
C17 C16 H16 119.5 . . ?
C15 C16 H16 119.5 . . ?
C16 C17 C12 119.8(3) . . ?
C16 C17 H17 120.1 . . ?
C12 C17 H17 120.1 . . ?
C21 C18 C20 108.8(3) . . ?
C21 C18 C15 109.8(3) . . ?
C20 C18 C15 112.2(3) . . ?
C21 C18 C19 109.2(3) . . ?
C20 C18 C19 108.3(3) . . ?
C15 C18 C19 108.4(3) . . ?
C18 C19 H19A 109.5 . . ?
C18 C19 H19B 109.5 . . ?
H19A C19 H19B 109.5 . . ?
C18 C19 H19C 109.5 . . ?
H19A C19 H19C 109.5 . . ?
H19B C19 H19C 109.5 . . ?
C18 C20 H20A 109.5 . . ?
C18 C20 H20B 109.5 . . ?
H20A C20 H20B 109.5 . . ?
C18 C20 H20C 109.5 . . ?
H20A C20 H20C 109.5 . . ?
H20B C20 H20C 109.5 . . ?
C18 C21 H21A 109.5 . . ?
C18 C21 H21B 109.5 . . ?
H21A C21 H21B 109.5 . . ?
C18 C21 H21C 109.5 . . ?
H21A C21 H21C 109.5 . . ?
H21B C21 H21C 109.5 . . ?
C27 C22 C23 117.7(3) . . ?
C27 C22 C1 120.8(2) . . ?
C23 C22 C1 121.6(3) . . ?
C24 C23 C22 120.9(3) . . ?
C24 C23 H23 119.5 . . ?
C22 C23 H23 119.5 . . ?
C25 C24 C23 121.6(3) . . ?
C25 C24 H24 119.2 . . ?
C23 C24 H24 119.2 . . ?
C24 C25 C26 117.4(3) . . ?
C24 C25 C28 121.2(3) . . ?
C26 C25 C28 121.3(3) . . ?
C27 C26 C25 121.1(3) . . ?
C27 C26 H26 119.4 . . ?
C25 C26 H26 119.4 . . ?
C26 C27 C22 121.3(3) . . ?
C26 C27 H27 119.4 . . ?
C22 C27 H27 119.4 . . ?
C25 C28 H28A 109.5 . . ?
C25 C28 H28B 109.5 . . ?
H28A C28 H28B 109.5 . . ?
C25 C28 H28C 109.5 . . ?
H28A C28 H28C 109.5 . . ?
H28B C28 H28C 109.5 . . ?
C2 N1 C3 128.7(3) . . ?
C2 N1 H1 119(3) . . ?
C3 N1 H1 112(3) . . ?
O3 S1 O2 118.50(14) . . ?
O3 S1 C12 108.44(15) . . ?
O2 S1 C12 107.74(15) . . ?
O3 S1 C11 111.43(14) . . ?
O2 S1 C11 104.40(14) . . ?
C12 S1 C11 105.55(13) . . ?
C50 C29 C30 109.8(2) . . ?
C50 C29 C38 113.6(2) . . ?
C30 C29 C38 106.5(2) . . ?
C50 C29 C39 110.9(2) . . ?
C30 C29 C39 106.4(2) . . ?
C38 C29 C39 109.4(2) . . ?
O4 C30 N2 122.3(3) . . ?
O4 C30 C29 123.1(3) . . ?
N2 C30 C29 114.6(2) . . ?
C32 C31 C36 119.7(3) . . ?
C32 C31 N2 118.6(3) . . ?
C36 C31 N2 121.5(3) . . ?
C33 C32 C31 120.0(3) . . ?
C33 C32 H32 120.0 . . ?
C31 C32 H32 120.0 . . ?
C34 C33 C32 120.8(4) . . ?
C34 C33 H33 119.6 . . ?
C32 C33 H33 119.6 . . ?
C33 C34 C35 119.1(3) . . ?
C33 C34 C37 121.0(5) . . ?
C35 C34 C37 119.9(5) . . ?
C36 C35 C34 120.8(4) . . ?
C36 C35 H35 119.6 . . ?
C34 C35 H35 119.6 . . ?
C35 C36 C31 119.6(3) . . ?
C35 C36 H36 120.2 . . ?
C31 C36 H36 120.2 . . ?
C34 C37 H37A 109.5 . . ?
C34 C37 H37B 109.5 . . ?
H37A C37 H37B 109.5 . . ?
C34 C37 H37C 109.5 . . ?
H37A C37 H37C 109.5 . . ?
H37B C37 H37C 109.5 . . ?
C29 C38 H38A 109.5 . . ?
C29 C38 H38B 109.5 . . ?
H38A C38 H38B 109.5 . . ?
C29 C38 H38C 109.5 . . ?
H38A C38 H38C 109.5 . . ?
H38B C38 H38C 109.5 . . ?
C29 C39 S2 119.3(2) . . ?
C29 C39 H39A 107.5 . . ?
S2 C39 H39A 107.5 . . ?
C29 C39 H39B 107.5 . . ?
S2 C39 H39B 107.5 . . ?
H39A C39 H39B 107.0 . . ?
C45 C40 C41 120.2(3) . . ?
C45 C40 S2 119.5(2) . . ?
C41 C40 S2 120.1(2) . . ?
C40 C41 C42 119.2(3) . . ?
C40 C41 H41 120.4 . . ?
C42 C41 H41 120.4 . . ?
C43 C42 C41 121.4(3) . . ?
C43 C42 H42 119.3 . . ?
C41 C42 H42 119.3 . . ?
C42 C43 C44 118.5(3) . . ?
C42 C43 C46 119.7(3) . . ?
C44 C43 C46 121.8(3) . . ?
C45 C44 C43 120.5(3) . . ?
C45 C44 H44 119.7 . . ?
C43 C44 H44 119.7 . . ?
C40 C45 C44 120.1(3) . . ?
C40 C45 H45 119.9 . . ?
C44 C45 H45 119.9 . . ?
C49 C46 C47 109.0(4) . . ?
C49 C46 C48 108.9(4) . . ?
C47 C46 C48 108.5(4) . . ?
C49 C46 C43 111.9(3) . . ?
C47 C46 C43 109.3(3) . . ?
C48 C46 C43 109.2(3) . . ?
C46 C47 H47A 109.5 . . ?
C46 C47 H47B 109.5 . . ?
H47A C47 H47B 109.5 . . ?
C46 C47 H47C 109.5 . . ?
H47A C47 H47C 109.5 . . ?
H47B C47 H47C 109.5 . . ?
C46 C48 H48A 109.5 . . ?
C46 C48 H48B 109.5 . . ?
H48A C48 H48B 109.5 . . ?
C46 C48 H48C 109.5 . . ?
H48A C48 H48C 109.5 . . ?
H48B C48 H48C 109.5 . . ?
C46 C49 H49A 109.5 . . ?
C46 C49 H49B 109.5 . . ?
H49A C49 H49B 109.5 . . ?
C46 C49 H49C 109.5 . . ?
H49A C49 H49C 109.5 . . ?
H49B C49 H49C 109.5 . . ?
C51 C50 C55 118.3(3) . . ?
C51 C50 C29 122.8(3) . . ?
C55 C50 C29 118.9(3) . . ?
C50 C51 C52 120.2(3) . . ?
C50 C51 H51 119.9 . . ?
C52 C51 H51 119.9 . . ?
C53 C52 C51 121.6(3) . . ?
C53 C52 H52 119.2 . . ?
C51 C52 H52 119.2 . . ?
C52 C53 C54 118.9(3) . . ?
C52 C53 C56 120.2(4) . . ?
C54 C53 C56 120.9(4) . . ?
C53 C54 C55 120.1(3) . . ?
C53 C54 H54 120.0 . . ?
C55 C54 H54 120.0 . . ?
C50 C55 C54 120.9(3) . . ?
C50 C55 H55 119.6 . . ?
C54 C55 H55 119.6 . . ?
C53 C56 H56A 109.5 . . ?
C53 C56 H56B 109.5 . . ?
H56A C56 H56B 109.5 . . ?
C53 C56 H56C 109.5 . . ?
H56A C56 H56C 109.5 . . ?
H56B C56 H56C 109.5 . . ?
C30 N2 C31 127.0(3) . . ?
C30 N2 H2 114(3) . . ?
C31 N2 H2 118(3) . . ?
O5 S2 O6 118.18(16) . . ?
O5 S2 C40 108.39(15) . . ?
O6 S2 C40 106.82(15) . . ?
O5 S2 C39 110.82(14) . . ?
O6 S2 C39 104.84(14) . . ?
C40 S2 C39 107.24(14) . . ?
C78 C57 C66 113.9(3) . . ?
C78 C57 C67 111.5(3) . . ?
C66 C57 C67 109.7(3) . . ?
C78 C57 C58 109.1(2) . . ?
C66 C57 C58 106.4(3) . . ?
C67 C57 C58 105.9(2) . . ?
O7 C58 N3 122.3(3) . . ?
O7 C58 C57 122.7(3) . . ?
N3 C58 C57 114.9(3) . . ?
C60 C59 N3 123.0(3) . . ?
C60 C59 C64 118.6(3) . . ?
N3 C59 C64 118.3(3) . . ?
C61 C60 C59 119.6(4) . . ?
C61 C60 H60 120.2 . . ?
C59 C60 H60 120.2 . . ?
C60 C61 C62 122.7(4) . . ?
C60 C61 H61 118.6 . . ?
C62 C61 H61 118.6 . . ?
C61 C62 C63 116.9(3) . . ?
C61 C62 C65 121.6(4) . . ?
C63 C62 C65 121.5(4) . . ?
C64 C63 C62 122.2(4) . . ?
C64 C63 H63 118.9 . . ?
C62 C63 H63 118.9 . . ?
C63 C64 C59 120.0(3) . . ?
C63 C64 H64 120.0 . . ?
C59 C64 H64 120.0 . . ?
C62 C65 H65A 109.5 . . ?
C62 C65 H65B 109.5 . . ?
H65A C65 H65B 109.5 . . ?
C62 C65 H65C 109.5 . . ?
H65A C65 H65C 109.5 . . ?
H65B C65 H65C 109.5 . . ?
C57 C66 H66A 109.5 . . ?
C57 C66 H66B 109.5 . . ?
H66A C66 H66B 109.5 . . ?
C57 C66 H66C 109.5 . . ?
H66A C66 H66C 109.5 . . ?
H66B C66 H66C 109.5 . . ?
C57 C67 S3 118.2(2) . . ?
C57 C67 H67A 107.8 . . ?
S3 C67 H67A 107.8 . . ?
C57 C67 H67B 107.8 . . ?
S3 C67 H67B 107.8 . . ?
H67A C67 H67B 107.1 . . ?
C69 C68 C73 120.9(3) . . ?
C69 C68 S3 119.1(2) . . ?
C73 C68 S3 120.1(3) . . ?
C68 C69 C70 119.4(3) . . ?
C68 C69 H69 120.3 . . ?
C70 C69 H69 120.3 . . ?
C69 C70 C71 121.4(4) . . ?
C69 C70 H70 119.3 . . ?
C71 C70 H70 119.3 . . ?
C72 C71 C70 117.6(3) . . ?
C72 C71 C74 121.3(3) . . ?
C70 C71 C74 121.0(3) . . ?
C73 C72 C71 121.6(3) . . ?
C73 C72 H72 119.2 . . ?
C71 C72 H72 119.2 . . ?
C68 C73 C72 119.1(3) . . ?
C68 C73 H73 120.4 . . ?
C72 C73 H73 120.4 . . ?
C75 C74 C76 108.4(3) . . ?
C75 C74 C71 111.4(3) . . ?
C76 C74 C71 111.1(3) . . ?
C75 C74 C77 109.7(3) . . ?
C76 C74 C77 108.7(3) . . ?
C71 C74 C77 107.5(3) . . ?
C74 C75 H75A 109.5 . . ?
C74 C75 H75B 109.5 . . ?
H75A C75 H75B 109.5 . . ?
C74 C75 H75C 109.5 . . ?
H75A C75 H75C 109.5 . . ?
H75B C75 H75C 109.5 . . ?
C74 C76 H76A 109.5 . . ?
C74 C76 H76B 109.5 . . ?
H76A C76 H76B 109.5 . . ?
C74 C76 H76C 109.5 . . ?
H76A C76 H76C 109.5 . . ?
H76B C76 H76C 109.5 . . ?
C74 C77 H77A 109.5 . . ?
C74 C77 H77B 109.5 . . ?
H77A C77 H77B 109.5 . . ?
C74 C77 H77C 109.5 . . ?
H77A C77 H77C 109.5 . . ?
H77B C77 H77C 109.5 . . ?
C83 C78 C79 118.1(3) . . ?
C83 C78 C57 119.2(3) . . ?
C79 C78 C57 122.7(3) . . ?
C78 C79 C80 119.9(3) . . ?
C78 C79 H79 120.0 . . ?
C80 C79 H79 120.0 . . ?
C81 C80 C79 122.4(3) . . ?
C81 C80 H80 118.8 . . ?
C79 C80 H80 118.8 . . ?
C80 C81 C82 117.1(3) . . ?
C80 C81 C84 122.0(3) . . ?
C82 C81 C84 120.9(4) . . ?
C83 C82 C81 120.8(3) . . ?
C83 C82 H82 119.6 . . ?
C81 C82 H82 119.6 . . ?
C82 C83 C78 121.6(3) . . ?
C82 C83 H83 119.2 . . ?
C78 C83 H83 119.2 . . ?
C81 C84 H84A 109.5 . . ?
C81 C84 H84B 109.5 . . ?
H84A C84 H84B 109.5 . . ?
C81 C84 H84C 109.5 . . ?
H84A C84 H84C 109.5 . . ?
H84B C84 H84C 109.5 . . ?
C58 N3 C59 127.5(3) . . ?
C58 N3 H3 114(3) . . ?
C59 N3 H3 119(3) . . ?
O9 S3 O8 118.88(18) . . ?
O9 S3 C68 108.94(16) . . ?
O8 S3 C68 106.86(16) . . ?
O9 S3 C67 111.12(15) . . ?
O8 S3 C67 104.71(15) . . ?
C68 S3 C67 105.45(16) . . ?
C106 C85 C94 114.2(3) . . ?
C106 C85 C95 112.4(3) . . ?
C94 C85 C95 107.7(3) . . ?
C106 C85 C86 107.5(2) . . ?
C94 C85 C86 110.1(3) . . ?
C95 C85 C86 104.4(2) . . ?
O10 C86 N4 123.5(3) . . ?
O10 C86 C85 122.1(3) . . ?
N4 C86 C85 114.5(3) . . ?
C88 C87 C92 118.7(3) . . ?
C88 C87 N4 124.6(3) . . ?
C92 C87 N4 116.8(3) . . ?
C87 C88 C89 119.4(3) . . ?
C87 C88 H88 120.3 . . ?
C89 C88 H88 120.3 . . ?
C90 C89 C88 122.5(4) . . ?
C90 C89 H89 118.8 . . ?
C88 C89 H89 118.8 . . ?
C89 C90 C91 117.2(3) . . ?
C89 C90 C93 120.9(4) . . ?
C91 C90 C93 121.9(4) . . ?
C92 C91 C90 121.7(3) . . ?
C92 C91 H91 119.1 . . ?
C90 C91 H91 119.1 . . ?
C91 C92 C87 120.5(4) . . ?
C91 C92 H92 119.7 . . ?
C87 C92 H92 119.7 . . ?
C90 C93 H93A 109.5 . . ?
C90 C93 H93B 109.5 . . ?
H93A C93 H93B 109.5 . . ?
C90 C93 H93C 109.5 . . ?
H93A C93 H93C 109.5 . . ?
H93B C93 H93C 109.5 . . ?
C85 C94 H94A 109.5 . . ?
C85 C94 H94B 109.5 . . ?
H94A C94 H94B 109.5 . . ?
C85 C94 H94C 109.5 . . ?
H94A C94 H94C 109.5 . . ?
H94B C94 H94C 109.5 . . ?
C85 C95 S4 119.0(2) . . ?
C85 C95 H95A 107.6 . . ?
S4 C95 H95A 107.6 . . ?
C85 C95 H95B 107.6 . . ?
S4 C95 H95B 107.6 . . ?
H95A C95 H95B 107.0 . . ?
C97 C96 C101 120.5(3) . . ?
C97 C96 S4 119.5(3) . . ?
C101 C96 S4 120.0(3) . . ?
C96 C97 C98 119.7(3) . . ?
C96 C97 H97 120.1 . . ?
C98 C97 H97 120.1 . . ?
C97 C98 C99 121.4(3) . . ?
C97 C98 H98 119.3 . . ?
C99 C98 H98 119.3 . . ?
C98 C99 C100 117.5(3) . . ?
C98 C99 C102 122.8(3) . . ?
C100 C99 C102 119.7(3) . . ?
C101 C100 C99 121.7(3) . . ?
C101 C100 H100 119.1 . . ?
C99 C100 H100 119.1 . . ?
C100 C101 C96 119.1(3) . . ?
C100 C101 H101 120.4 . . ?
C96 C101 H101 120.4 . . ?
C103 C102 C99 111.4(3) . . ?
C103 C102 C104 109.7(4) . . ?
C99 C102 C104 110.3(3) . . ?
C103 C102 C105 108.8(3) . . ?
C99 C102 C105 108.3(3) . . ?
C104 C102 C105 108.3(3) . . ?
C102 C103 H10D 109.5 . . ?
C102 C103 H10E 109.5 . . ?
H10D C103 H10E 109.5 . . ?
C102 C103 H10F 109.5 . . ?
H10D C103 H10F 109.5 . . ?
H10E C103 H10F 109.5 . . ?
C102 C104 H10G 109.5 . . ?
C102 C104 H10H 109.5 . . ?
H10G C104 H10H 109.5 . . ?
C102 C104 H10I 109.5 . . ?
H10G C104 H10I 109.5 . . ?
H10H C104 H10I 109.5 . . ?
C102 C105 H10J 109.5 . . ?
C102 C105 H10K 109.5 . . ?
H10J C105 H10K 109.5 . . ?
C102 C105 H10L 109.5 . . ?
H10J C105 H10L 109.5 . . ?
H10K C105 H10L 109.5 . . ?
C107 C106 C111 117.8(3) . . ?
C107 C106 C85 121.1(3) . . ?
C111 C106 C85 121.1(3) . . ?
C106 C107 C108 121.2(3) . . ?
C106 C107 H107 119.4 . . ?
C108 C107 H107 119.4 . . ?
C107 C108 C109 121.2(3) . . ?
C107 C108 H108 119.4 . . ?
C109 C108 H108 119.4 . . ?
C110 C109 C108 117.7(3) . . ?
C110 C109 C112 121.4(3) . . ?
C108 C109 C112 120.8(4) . . ?
C109 C110 C111 121.6(3) . . ?
C109 C110 H110 119.2 . . ?
C111 C110 H110 119.2 . . ?
C110 C111 C106 120.5(3) . . ?
C110 C111 H111 119.8 . . ?
C106 C111 H111 119.8 . . ?
C109 C112 H11C 109.5 . . ?
C109 C112 H11D 109.5 . . ?
H11C C112 H11D 109.5 . . ?
C109 C112 H11E 109.5 . . ?
H11C C112 H11E 109.5 . . ?
H11D C112 H11E 109.5 . . ?
C86 N4 C87 127.6(3) . . ?
C86 N4 H4 116(3) . . ?
C87 N4 H4 116(3) . . ?
O11 S4 O12 118.25(15) . . ?
O11 S4 C96 108.59(15) . . ?
O12 S4 C96 107.66(16) . . ?
O11 S4 C95 111.18(15) . . ?
O12 S4 C95 104.66(15) . . ?
C96 S4 C95 105.77(15) . . ?
 
loop_
 _geom_torsion_atom_site_label_1
 _geom_torsion_atom_site_label_2
 _geom_torsion_atom_site_label_3
 _geom_torsion_atom_site_label_4
 _geom_torsion
 _geom_torsion_site_symmetry_1
 _geom_torsion_site_symmetry_2
 _geom_torsion_site_symmetry_3
 _geom_torsion_site_symmetry_4
 _geom_torsion_publ_flag
C10 C1 C2 O1 144.0(3) . . . . ?
C22 C1 C2 O1 -91.7(3) . . . . ?
C11 C1 C2 O1 27.7(3) . . . . ?
C10 C1 C2 N1 -36.1(3) . . . . ?
C22 C1 C2 N1 88.1(3) . . . . ?
C11 C1 C2 N1 -152.4(2) . . . . ?
C8 C3 C4 C5 0.8(5) . . . . ?
N1 C3 C4 C5 -179.9(3) . . . . ?
C3 C4 C5 C6 -0.4(5) . . . . ?
C4 C5 C6 C7 -0.5(5) . . . . ?
C4 C5 C6 C9 179.4(4) . . . . ?
C5 C6 C7 C8 1.0(5) . . . . ?
C9 C6 C7 C8 -178.9(3) . . . . ?
C4 C3 C8 C7 -0.2(4) . . . . ?
N1 C3 C8 C7 -179.5(3) . . . . ?
C6 C7 C8 C3 -0.6(5) . . . . ?
C10 C1 C11 S1 74.6(3) . . . . ?
C22 C1 C11 S1 -50.8(3) . . . . ?
C2 C1 C11 S1 -167.30(19) . . . . ?
C17 C12 C13 C14 0.5(4) . . . . ?
S1 C12 C13 C14 -179.8(2) . . . . ?
C12 C13 C14 C15 -1.8(4) . . . . ?
C13 C14 C15 C16 2.0(4) . . . . ?
C13 C14 C15 C18 -178.5(3) . . . . ?
C14 C15 C16 C17 -0.9(5) . . . . ?
C18 C15 C16 C17 179.6(3) . . . . ?
C15 C16 C17 C12 -0.3(5) . . . . ?
C13 C12 C17 C16 0.5(5) . . . . ?
S1 C12 C17 C16 -179.1(2) . . . . ?
C14 C15 C18 C21 -59.9(4) . . . . ?
C16 C15 C18 C21 119.6(4) . . . . ?
C14 C15 C18 C20 178.9(3) . . . . ?
C16 C15 C18 C20 -1.6(4) . . . . ?
C14 C15 C18 C19 59.3(4) . . . . ?
C16 C15 C18 C19 -121.2(4) . . . . ?
C10 C1 C22 C27 168.4(3) . . . . ?
C11 C1 C22 C27 -68.9(3) . . . . ?
C2 C1 C22 C27 45.6(3) . . . . ?
C10 C1 C22 C23 -11.3(4) . . . . ?
C11 C1 C22 C23 111.4(3) . . . . ?
C2 C1 C22 C23 -134.2(3) . . . . ?
C27 C22 C23 C24 0.3(4) . . . . ?
C1 C22 C23 C24 -179.9(3) . . . . ?
C22 C23 C24 C25 -0.5(5) . . . . ?
C23 C24 C25 C26 0.1(5) . . . . ?
C23 C24 C25 C28 -179.1(3) . . . . ?
C24 C25 C26 C27 0.4(4) . . . . ?
C28 C25 C26 C27 179.7(3) . . . . ?
C25 C26 C27 C22 -0.6(4) . . . . ?
C23 C22 C27 C26 0.2(4) . . . . ?
C1 C22 C27 C26 -179.5(3) . . . . ?
O1 C2 N1 C3 -5.7(5) . . . . ?
C1 C2 N1 C3 174.4(3) . . . . ?
C8 C3 N1 C2 9.2(5) . . . . ?
C4 C3 N1 C2 -170.1(3) . . . . ?
C13 C12 S1 O3 9.0(3) . . . . ?
C17 C12 S1 O3 -171.4(2) . . . . ?
C13 C12 S1 O2 138.3(2) . . . . ?
C17 C12 S1 O2 -42.0(3) . . . . ?
C13 C12 S1 C11 -110.6(2) . . . . ?
C17 C12 S1 C11 69.1(3) . . . . ?
C1 C11 S1 O3 -32.5(3) . . . . ?
C1 C11 S1 O2 -161.6(2) . . . . ?
C1 C11 S1 C12 85.0(3) . . . . ?
C50 C29 C30 O4 -123.3(3) . . . . ?
C38 C29 C30 O4 113.3(3) . . . . ?
C39 C29 C30 O4 -3.3(4) . . . . ?
C50 C29 C30 N2 58.2(3) . . . . ?
C38 C29 C30 N2 -65.1(3) . . . . ?
C39 C29 C30 N2 178.3(2) . . . . ?
C36 C31 C32 C33 0.3(5) . . . . ?
N2 C31 C32 C33 176.1(3) . . . . ?
C31 C32 C33 C34 0.5(5) . . . . ?
C32 C33 C34 C35 -1.3(6) . . . . ?
C32 C33 C34 C37 176.7(4) . . . . ?
C33 C34 C35 C36 1.4(6) . . . . ?
C37 C34 C35 C36 -176.6(5) . . . . ?
C34 C35 C36 C31 -0.6(6) . . . . ?
C32 C31 C36 C35 -0.3(5) . . . . ?
N2 C31 C36 C35 -175.9(3) . . . . ?
C50 C29 C39 S2 -57.0(3) . . . . ?
C30 C29 C39 S2 -176.3(2) . . . . ?
C38 C29 C39 S2 69.0(3) . . . . ?
C45 C40 C41 C42 0.7(4) . . . . ?
S2 C40 C41 C42 -174.7(2) . . . . ?
C40 C41 C42 C43 -0.6(4) . . . . ?
C41 C42 C43 C44 -0.1(5) . . . . ?
C41 C42 C43 C46 179.4(3) . . . . ?
C42 C43 C44 C45 0.6(5) . . . . ?
C46 C43 C44 C45 -178.8(3) . . . . ?
C41 C40 C45 C44 -0.2(5) . . . . ?
S2 C40 C45 C44 175.2(3) . . . . ?
C43 C44 C45 C40 -0.5(6) . . . . ?
C42 C43 C46 C49 -178.0(4) . . . . ?
C44 C43 C46 C49 1.5(6) . . . . ?
C42 C43 C46 C47 -57.2(5) . . . . ?
C44 C43 C46 C47 122.3(4) . . . . ?
C42 C43 C46 C48 61.4(4) . . . . ?
C44 C43 C46 C48 -119.1(4) . . . . ?
C30 C29 C50 C51 -124.4(3) . . . . ?
C38 C29 C50 C51 -5.2(4) . . . . ?
C39 C29 C50 C51 118.4(3) . . . . ?
C30 C29 C50 C55 56.6(3) . . . . ?
C38 C29 C50 C55 175.7(3) . . . . ?
C39 C29 C50 C55 -60.7(3) . . . . ?
C55 C50 C51 C52 1.8(4) . . . . ?
C29 C50 C51 C52 -177.2(3) . . . . ?
C50 C51 C52 C53 -0.8(5) . . . . ?
C51 C52 C53 C54 -0.8(5) . . . . ?
C51 C52 C53 C56 177.6(3) . . . . ?
C52 C53 C54 C55 1.3(5) . . . . ?
C56 C53 C54 C55 -177.1(3) . . . . ?
C51 C50 C55 C54 -1.3(4) . . . . ?
C29 C50 C55 C54 177.8(3) . . . . ?
C53 C54 C55 C50 -0.2(5) . . . . ?
O4 C30 N2 C31 -10.6(5) . . . . ?
C29 C30 N2 C31 167.9(3) . . . . ?
C32 C31 N2 C30 150.3(3) . . . . ?
C36 C31 N2 C30 -34.0(5) . . . . ?
C45 C40 S2 O5 -165.0(3) . . . . ?
C41 C40 S2 O5 10.5(3) . . . . ?
C45 C40 S2 O6 -36.6(3) . . . . ?
C41 C40 S2 O6 138.8(2) . . . . ?
C45 C40 S2 C39 75.4(3) . . . . ?
C41 C40 S2 C39 -109.2(2) . . . . ?
C29 C39 S2 O5 -35.6(3) . . . . ?
C29 C39 S2 O6 -164.1(2) . . . . ?
C29 C39 S2 C40 82.6(3) . . . . ?
C78 C57 C58 O7 -125.0(3) . . . . ?
C66 C57 C58 O7 111.7(3) . . . . ?
C67 C57 C58 O7 -4.9(4) . . . . ?
C78 C57 C58 N3 57.0(4) . . . . ?
C66 C57 C58 N3 -66.3(4) . . . . ?
C67 C57 C58 N3 177.1(3) . . . . ?
N3 C59 C60 C61 -176.0(3) . . . . ?
C64 C59 C60 C61 -0.8(5) . . . . ?
C59 C60 C61 C62 0.6(6) . . . . ?
C60 C61 C62 C63 0.1(6) . . . . ?
C60 C61 C62 C65 -178.4(4) . . . . ?
C61 C62 C63 C64 -0.5(6) . . . . ?
C65 C62 C63 C64 178.1(4) . . . . ?
C62 C63 C64 C59 0.2(5) . . . . ?
C60 C59 C64 C63 0.5(5) . . . . ?
N3 C59 C64 C63 175.9(3) . . . . ?
C78 C57 C67 S3 -53.2(4) . . . . ?
C66 C57 C67 S3 73.9(3) . . . . ?
C58 C57 C67 S3 -171.8(2) . . . . ?
C73 C68 C69 C70 2.0(5) . . . . ?
S3 C68 C69 C70 -179.3(3) . . . . ?
C68 C69 C70 C71 -1.5(5) . . . . ?
C69 C70 C71 C72 -0.1(5) . . . . ?
C69 C70 C71 C74 176.8(3) . . . . ?
C70 C71 C72 C73 1.3(5) . . . . ?
C74 C71 C72 C73 -175.6(3) . . . . ?
C69 C68 C73 C72 -0.9(5) . . . . ?
S3 C68 C73 C72 -179.6(2) . . . . ?
C71 C72 C73 C68 -0.8(5) . . . . ?
C72 C71 C74 C75 -155.1(3) . . . . ?
C70 C71 C74 C75 28.2(4) . . . . ?
C72 C71 C74 C76 -34.1(4) . . . . ?
C70 C71 C74 C76 149.1(3) . . . . ?
C72 C71 C74 C77 84.7(4) . . . . ?
C70 C71 C74 C77 -92.1(4) . . . . ?
C66 C57 C78 C83 172.1(3) . . . . ?
C67 C57 C78 C83 -63.2(4) . . . . ?
C58 C57 C78 C83 53.4(4) . . . . ?
C66 C57 C78 C79 -9.7(4) . . . . ?
C67 C57 C78 C79 115.0(3) . . . . ?
C58 C57 C78 C79 -128.4(3) . . . . ?
C83 C78 C79 C80 1.2(5) . . . . ?
C57 C78 C79 C80 -177.0(3) . . . . ?
C78 C79 C80 C81 -0.3(5) . . . . ?
C79 C80 C81 C82 -1.2(5) . . . . ?
C79 C80 C81 C84 177.3(3) . . . . ?
C80 C81 C82 C83 1.7(5) . . . . ?
C84 C81 C82 C83 -176.8(3) . . . . ?
C81 C82 C83 C78 -0.8(5) . . . . ?
C79 C78 C83 C82 -0.7(5) . . . . ?
C57 C78 C83 C82 177.6(3) . . . . ?
O7 C58 N3 C59 -5.0(6) . . . . ?
C57 C58 N3 C59 173.0(3) . . . . ?
C60 C59 N3 C58 -33.4(5) . . . . ?
C64 C59 N3 C58 151.5(3) . . . . ?
C69 C68 S3 O9 -172.4(3) . . . . ?
C73 C68 S3 O9 6.4(3) . . . . ?
C69 C68 S3 O8 -42.8(3) . . . . ?
C73 C68 S3 O8 136.0(3) . . . . ?
C69 C68 S3 C67 68.2(3) . . . . ?
C73 C68 S3 C67 -113.0(3) . . . . ?
C57 C67 S3 O9 -33.4(3) . . . . ?
C57 C67 S3 O8 -163.0(3) . . . . ?
C57 C67 S3 C68 84.5(3) . . . . ?
C106 C85 C86 O10 -96.3(3) . . . . ?
C94 C85 C86 O10 138.6(3) . . . . ?
C95 C85 C86 O10 23.3(4) . . . . ?
C106 C85 C86 N4 83.5(3) . . . . ?
C94 C85 C86 N4 -41.5(3) . . . . ?
C95 C85 C86 N4 -156.8(3) . . . . ?
C92 C87 C88 C89 1.2(5) . . . . ?
N4 C87 C88 C89 -177.7(3) . . . . ?
C87 C88 C89 C90 -0.5(6) . . . . ?
C88 C89 C90 C91 -1.2(6) . . . . ?
C88 C89 C90 C93 179.2(4) . . . . ?
C89 C90 C91 C92 2.3(6) . . . . ?
C93 C90 C91 C92 -178.2(4) . . . . ?
C90 C91 C92 C87 -1.6(6) . . . . ?
C88 C87 C92 C91 -0.2(5) . . . . ?
N4 C87 C92 C91 178.8(3) . . . . ?
C106 C85 C95 S4 -51.8(3) . . . . ?
C94 C85 C95 S4 74.9(3) . . . . ?
C86 C85 C95 S4 -168.1(2) . . . . ?
C101 C96 C97 C98 0.7(5) . . . . ?
S4 C96 C97 C98 -179.5(3) . . . . ?
C96 C97 C98 C99 -0.6(5) . . . . ?
C97 C98 C99 C100 0.0(5) . . . . ?
C97 C98 C99 C102 179.3(3) . . . . ?
C98 C99 C100 C101 0.4(5) . . . . ?
C102 C99 C100 C101 -178.8(3) . . . . ?
C99 C100 C101 C96 -0.4(5) . . . . ?
C97 C96 C101 C100 -0.2(5) . . . . ?
S4 C96 C101 C100 180.0(2) . . . . ?
C98 C99 C102 C103 2.5(5) . . . . ?
C100 C99 C102 C103 -178.3(3) . . . . ?
C98 C99 C102 C104 124.5(4) . . . . ?
C100 C99 C102 C104 -56.2(4) . . . . ?
C98 C99 C102 C105 -117.1(4) . . . . ?
C100 C99 C102 C105 62.2(4) . . . . ?
C94 C85 C106 C107 169.4(3) . . . . ?
C95 C85 C106 C107 -67.5(4) . . . . ?
C86 C85 C106 C107 46.9(4) . . . . ?
C94 C85 C106 C111 -11.0(4) . . . . ?
C95 C85 C106 C111 112.1(3) . . . . ?
C86 C85 C106 C111 -133.5(3) . . . . ?
C111 C106 C107 C108 0.7(4) . . . . ?
C85 C106 C107 C108 -179.7(3) . . . . ?
C106 C107 C108 C109 0.0(5) . . . . ?
C107 C108 C109 C110 -0.9(5) . . . . ?
C107 C108 C109 C112 179.1(3) . . . . ?
C108 C109 C110 C111 1.2(5) . . . . ?
C112 C109 C110 C111 -178.8(3) . . . . ?
C109 C110 C111 C106 -0.6(5) . . . . ?
C107 C106 C111 C110 -0.4(5) . . . . ?
C85 C106 C111 C110 180.0(3) . . . . ?
O10 C86 N4 C87 -7.5(5) . . . . ?
C85 C86 N4 C87 172.7(3) . . . . ?
C88 C87 N4 C86 5.3(5) . . . . ?
C92 C87 N4 C86 -173.6(3) . . . . ?
C97 C96 S4 O11 -170.8(3) . . . . ?
C101 C96 S4 O11 9.1(3) . . . . ?
C97 C96 S4 O12 -41.6(3) . . . . ?
C101 C96 S4 O12 138.2(3) . . . . ?
C97 C96 S4 C95 69.8(3) . . . . ?
C101 C96 S4 C95 -110.4(3) . . . . ?
C85 C95 S4 O11 -33.6(3) . . . . ?
C85 C95 S4 O12 -162.4(3) . . . . ?
C85 C95 S4 C96 84.1(3) . . . . ?
 
loop_
 _geom_hbond_atom_site_label_D 
 _geom_hbond_atom_site_label_H 
 _geom_hbond_atom_site_label_A 
 _geom_hbond_distance_DH 
 _geom_hbond_distance_HA 
 _geom_hbond_distance_DA 
 _geom_hbond_angle_DHA 
 _geom_hbond_site_symmetry_A 
 _geom_hbond_publ_flag
N1 H1 O4  0.75(4) 2.21(4) 2.896(3) 153(4) . yes
N3 H3 O10  0.79(4) 2.13(4) 2.826(4) 146(4) 1_565 yes
N2 H2 O1  0.82(4) 2.18(4) 2.869(3) 142(3) 1_565 yes
N4 H4 O7  0.88(5) 2.05(5) 2.868(4) 155(4) . yes
 

_shelx_res_file
;
TITL nv1802_a.res in P2(1)
    x.res
    created by SHELXL-2018/3 at 08:45:58 on 13-Apr-2018
CELL 1.54184 22.913376 9.715472 27.976333 90 104.6608 90
ZERR 2 0.000272 0.00009 0.000258 0 0.0011 0
LATT -1
SYMM -X,0.5+Y,-Z
SFAC C H N O S
UNIT 254 328 8 30 8
EQIV $1 +X,1+Y,+Z
TEMP -113
L.S. 10 0 151
PLAN  20
SIZE 0.02 0.13 0.3
HTAB C8 O1
HTAB N1 O4
HTAB N3 O10_$1
HTAB N2 O1_$1
HTAB C88 O10
HTAB N4 O7
BOND $H
CONF
ABIN
fmap 2
acta
OMIT 0 0 12
OMIT -5 1 19
WGHT    0.074700    0.400000
FVAR       1.27998
C1    1    0.211071    0.040971    0.522007    11.00000    0.03247    0.02821 =
         0.03765    0.00183    0.01441   -0.00090
C2    1    0.262301    0.002833    0.496652    11.00000    0.03103    0.02620 =
         0.03491    0.00355    0.00884    0.00217
C3    1    0.361172    0.086863    0.487264    11.00000    0.02907    0.03069 =
         0.04150    0.00598    0.01004    0.00052
C4    1    0.403890    0.189546    0.504437    11.00000    0.03752    0.03852 =
         0.06305   -0.00445    0.01328   -0.00581
AFIX  43
H4A   2    0.395528    0.260558    0.525087    11.00000   -1.20000
AFIX   0
C5    1    0.458478    0.188612    0.491556    11.00000    0.03194    0.04997 =
         0.06905    0.00040    0.01197   -0.01103
AFIX  43
H5    2    0.486933    0.259684    0.503416    11.00000   -1.20000
AFIX   0
C6    1    0.472432    0.086342    0.461777    11.00000    0.03494    0.05536 =
         0.04673    0.01202    0.01410   -0.00281
C7    1    0.429656   -0.015715    0.445670    11.00000    0.03830    0.05220 =
         0.05178    0.00263    0.02061    0.00296
AFIX  43
H7    2    0.438521   -0.087728    0.425636    11.00000   -1.20000
AFIX   0
C8    1    0.374382   -0.017024    0.457610    11.00000    0.03462    0.03683 =
         0.04643   -0.00075    0.01608   -0.00411
AFIX  43
H8    2    0.345990   -0.088134    0.445628    11.00000   -1.20000
AFIX   0
C9    1    0.531393    0.085797    0.447354    11.00000    0.03894    0.08495 =
         0.07429    0.00657    0.02492   -0.00606
AFIX 137
H9A   2    0.543659   -0.009404    0.443605    11.00000   -1.50000
H9B   2    0.562338    0.131598    0.473079    11.00000   -1.50000
H9C   2    0.526583    0.134841    0.415985    11.00000   -1.50000
AFIX   0
C10   1    0.236904    0.116288    0.571050    11.00000    0.03857    0.03984 =
         0.04046   -0.00286    0.01288    0.00042
AFIX 137
H10A  2    0.270096    0.062313    0.591498    11.00000   -1.50000
H10B  2    0.205177    0.127721    0.588542    11.00000   -1.50000
H10C  2    0.251929    0.206904    0.564415    11.00000   -1.50000
AFIX   0
C11   1    0.185818   -0.099311    0.533630    11.00000    0.03435    0.02956 =
         0.04389    0.00721    0.01585    0.00133
AFIX  23
H11A  2    0.216978   -0.142976    0.560405    11.00000   -1.20000
H11B  2    0.181061   -0.158113    0.503990    11.00000   -1.20000
AFIX   0
C12   1    0.059023   -0.106910    0.495332    11.00000    0.02925    0.03977 =
         0.04725    0.00452    0.01933   -0.00414
C13   1    0.022475    0.005151    0.481796    11.00000    0.03609    0.03796 =
         0.04885   -0.00087    0.02213   -0.00111
AFIX  43
H13   2    0.027807    0.084469    0.502305    11.00000   -1.20000
AFIX   0
C14   1   -0.022417    0.002443    0.437980    11.00000    0.03236    0.03716 =
         0.05511    0.00679    0.02097    0.00263
AFIX  43
H14   2   -0.048443    0.079506    0.429177    11.00000   -1.20000
AFIX   0
C15   1   -0.030102   -0.111847    0.406450    11.00000    0.03848    0.04121 =
         0.04471    0.00434    0.02031    0.00054
C16   1    0.008024   -0.225198    0.421539    11.00000    0.05350    0.03343 =
         0.05266   -0.00327    0.01920   -0.00156
AFIX  43
H16   2    0.003477   -0.304683    0.401149    11.00000   -1.20000
AFIX   0
C17   1    0.051902   -0.223062    0.465405    11.00000    0.04452    0.03737 =
         0.05094    0.00216    0.01793    0.00257
AFIX  43
H17   2    0.077269   -0.300777    0.475216    11.00000   -1.20000
AFIX   0
C18   1   -0.079212   -0.108785    0.357943    11.00000    0.04595    0.05567 =
         0.04643    0.00332    0.01917    0.00070
C19   1   -0.066751    0.013426    0.326854    11.00000    0.06148    0.07976 =
         0.05575    0.01944    0.01773   -0.00285
AFIX 137
H19A  2   -0.070294    0.099787    0.344001    11.00000   -1.50000
H19B  2   -0.096121    0.012831    0.294584    11.00000   -1.50000
H19C  2   -0.025910    0.005401    0.322200    11.00000   -1.50000
AFIX   0
C20   1   -0.080306   -0.239771    0.328070    11.00000    0.06981    0.07250 =
         0.04863   -0.00906    0.01004   -0.00306
AFIX 137
H20A  2   -0.041343   -0.251498    0.320105    11.00000   -1.50000
H20B  2   -0.112398   -0.233484    0.297423    11.00000   -1.50000
H20C  2   -0.087884   -0.318826    0.347411    11.00000   -1.50000
AFIX   0
C21   1   -0.140493   -0.089648    0.368553    11.00000    0.03840    0.09975 =
         0.05037   -0.00054    0.01185   -0.00530
AFIX 137
H21A  2   -0.149774   -0.170067    0.386454    11.00000   -1.50000
H21B  2   -0.171394   -0.079616    0.337340    11.00000   -1.50000
H21C  2   -0.139863   -0.006908    0.388714    11.00000   -1.50000
AFIX   0
C22   1    0.163664    0.125961    0.484972    11.00000    0.03154    0.02886 =
         0.03719    0.00191    0.01634   -0.00202
C23   1    0.139605    0.246248    0.499045    11.00000    0.04232    0.03207 =
         0.04305   -0.00280    0.01795    0.00322
AFIX  43
H23   2    0.152653    0.277114    0.532267    11.00000   -1.20000
AFIX   0
C24   1    0.096832    0.321760    0.465253    11.00000    0.04254    0.03675 =
         0.05629    0.00055    0.02451    0.00810
AFIX  43
H24   2    0.080877    0.403129    0.475903    11.00000   -1.20000
AFIX   0
C25   1    0.076818    0.281371    0.416346    11.00000    0.03271    0.03762 =
         0.05001    0.00997    0.01783    0.00459
C26   1    0.101289    0.160998    0.402217    11.00000    0.03813    0.04327 =
         0.03643    0.00091    0.01493    0.00096
AFIX  43
H26   2    0.088679    0.130905    0.368878    11.00000   -1.20000
AFIX   0
C27   1    0.143556    0.084873    0.435924    11.00000    0.03215    0.03009 =
         0.04325   -0.00016    0.01726    0.00032
AFIX  43
H27   2    0.159166    0.002912    0.425376    11.00000   -1.20000
AFIX   0
C28   1    0.030975    0.365180    0.379686    11.00000    0.05264    0.04937 =
         0.06582    0.01157    0.01484    0.01541
AFIX 137
H28A  2    0.048796    0.453675    0.374258    11.00000   -1.50000
H28B  2   -0.004378    0.381252    0.392636    11.00000   -1.50000
H28C  2    0.018707    0.315092    0.348333    11.00000   -1.50000
AFIX   0
N1    3    0.306524    0.095736    0.502153    11.00000    0.03498    0.02509 =
         0.05093   -0.00459    0.01959   -0.00140
H1    2    0.302800    0.164131    0.513451    11.00000    0.04059
O1    4    0.260939   -0.104687    0.473577    11.00000    0.03440    0.02655 =
         0.04769   -0.00405    0.01706   -0.00171
O2    4    0.116717   -0.237369    0.574644    11.00000    0.04533    0.05472 =
         0.05802    0.02217    0.01809   -0.00646
O3    4    0.108611    0.016107    0.578693    11.00000    0.04340    0.05839 =
         0.04236   -0.00358    0.02115   -0.00091
S1    5    0.116437   -0.104583    0.551393    11.00000    0.03428    0.04238 =
         0.04312    0.00739    0.01765   -0.00194

C29   1    0.261619    0.495926    0.429242    11.00000    0.03461    0.02805 =
         0.03696   -0.00497    0.00960   -0.00251
C30   1    0.283697    0.495033    0.485915    11.00000    0.03408    0.02536 =
         0.03835   -0.00094    0.01528    0.00059
C31   1    0.305346    0.653547    0.557286    11.00000    0.03392    0.03535 =
         0.03386   -0.00190    0.00903    0.00718
C32   1    0.342269    0.764757    0.575595    11.00000    0.03609    0.04037 =
         0.04101   -0.00645    0.00706    0.00646
AFIX  43
H32   2    0.362037    0.813258    0.554712    11.00000   -1.20000
AFIX   0
C33   1    0.350254    0.804839    0.624122    11.00000    0.04037    0.06665 =
         0.04658   -0.01920    0.00127    0.00226
AFIX  43
H33   2    0.375333    0.881490    0.636365    11.00000   -1.20000
AFIX   0
C34   1    0.322330    0.735149    0.655055    11.00000    0.05547    0.10391 =
         0.03879   -0.01777    0.01009    0.00806
C35   1    0.284807    0.625109    0.636510    11.00000    0.06002    0.08778 =
         0.03738   -0.00201    0.01868    0.00369
AFIX  43
H35   2    0.264685    0.577768    0.657411    11.00000   -1.20000
AFIX   0
C36   1    0.276353    0.583513    0.587909    11.00000    0.05158    0.04933 =
         0.04120   -0.00325    0.01825    0.00053
AFIX  43
H36   2    0.250877    0.507535    0.575597    11.00000   -1.20000
AFIX   0
C37   1    0.333738    0.774304    0.709437    11.00000    0.08714    0.19624 =
         0.04519   -0.03675    0.02010   -0.00769
AFIX 137
H37A  2    0.295897    0.804883    0.716266    11.00000   -1.50000
H37B  2    0.363398    0.849000    0.716959    11.00000   -1.50000
H37C  2    0.349249    0.694186    0.730028    11.00000   -1.50000
AFIX   0
C38   1    0.199841    0.568586    0.416508    11.00000    0.03774    0.04055 =
         0.04391   -0.00305    0.00494    0.00025
AFIX 137
H38A  2    0.205261    0.665891    0.425802    11.00000   -1.50000
H38B  2    0.173440    0.524917    0.434689    11.00000   -1.50000
H38C  2    0.181527    0.561168    0.380933    11.00000   -1.50000
AFIX   0
C39   1    0.253215    0.343512    0.412994    11.00000    0.04664    0.03011 =
         0.03611   -0.00478    0.01996   -0.00369
AFIX  23
H39A  2    0.222358    0.303444    0.428064    11.00000   -1.20000
H39B  2    0.291607    0.295195    0.427683    11.00000   -1.20000
AFIX   0
C40   1    0.298063    0.304063    0.327445    11.00000    0.04162    0.03909 =
         0.02952   -0.00323    0.01169   -0.00204
C41   1    0.307854    0.408614    0.296527    11.00000    0.04017    0.03771 =
         0.03348   -0.00004    0.00896   -0.00220
AFIX  43
H41   2    0.280658    0.483938    0.288772    11.00000   -1.20000
AFIX   0
C42   1    0.357986    0.401791    0.277019    11.00000    0.04731    0.04457 =
         0.03096    0.00261    0.01181   -0.00374
AFIX  43
H42   2    0.364506    0.472865    0.255628    11.00000   -1.20000
AFIX   0
C43   1    0.398373    0.294110    0.288075    11.00000    0.04534    0.04931 =
         0.03921    0.00047    0.01529   -0.00111
C44   1    0.388107    0.190709    0.319658    11.00000    0.05838    0.04995 =
         0.06117    0.01158    0.02671    0.01518
AFIX  43
H44   2    0.415630    0.116141    0.327993    11.00000   -1.20000
AFIX   0
C45   1    0.337866    0.196080    0.339012    11.00000    0.05841    0.04675 =
         0.04783    0.01524    0.02377    0.00727
AFIX  43
H45   2    0.331075    0.124930    0.360268    11.00000   -1.20000
AFIX   0
C46   1    0.452685    0.289832    0.265336    11.00000    0.04551    0.06439 =
         0.05997   -0.00353    0.02475   -0.00231
C47   1    0.430439    0.293544    0.209343    11.00000    0.06295    0.13479 =
         0.06163   -0.03705    0.03546   -0.02171
AFIX 137
H47A  2    0.406756    0.210538    0.197801    11.00000   -1.50000
H47B  2    0.465073    0.297358    0.194793    11.00000   -1.50000
H47C  2    0.405145    0.375129    0.199339    11.00000   -1.50000
AFIX   0
C48   1    0.492281    0.416576    0.282277    11.00000    0.05437    0.09977 =
         0.08870   -0.02693    0.02441   -0.02159
AFIX 137
H48A  2    0.469270    0.500043    0.270127    11.00000   -1.50000
H48B  2    0.527989    0.412094    0.269085    11.00000   -1.50000
H48C  2    0.504915    0.418680    0.318457    11.00000   -1.50000
AFIX   0
C49   1    0.490445    0.161489    0.280423    11.00000    0.08861    0.09062 =
         0.15789    0.01697    0.08227    0.02721
AFIX 137
H49A  2    0.504856    0.158218    0.316507    11.00000   -1.50000
H49B  2    0.525046    0.163398    0.265801    11.00000   -1.50000
H49C  2    0.465852    0.079856    0.268716    11.00000   -1.50000
AFIX   0
C50   1    0.308596    0.566424    0.407011    11.00000    0.03828    0.03067 =
         0.02999   -0.00238    0.00801   -0.00590
C51   1    0.294943    0.677612    0.375138    11.00000    0.05243    0.03611 =
         0.03734   -0.00205    0.00735   -0.00638
AFIX  43
H51   2    0.255490    0.715774    0.367371    11.00000   -1.20000
AFIX   0
C52   1    0.338998    0.733802    0.354380    11.00000    0.07278    0.04089 =
         0.03893    0.00627    0.01450   -0.01603
AFIX  43
H52   2    0.328778    0.809282    0.332251    11.00000   -1.20000
AFIX   0
C53   1    0.396318    0.682962    0.365103    11.00000    0.06600    0.05042 =
         0.04362   -0.01018    0.02669   -0.02404
C54   1    0.411149    0.573557    0.397988    11.00000    0.04532    0.05242 =
         0.04714   -0.00739    0.01746   -0.01348
AFIX  43
H54   2    0.451089    0.538110    0.406386    11.00000   -1.20000
AFIX   0
C55   1    0.367350    0.515700    0.418694    11.00000    0.04059    0.04103 =
         0.03887    0.00071    0.01134   -0.00382
AFIX  43
H55   2    0.377797    0.440758    0.441040    11.00000   -1.20000
AFIX   0
C56   1    0.442642    0.743241    0.340244    11.00000    0.09695    0.06493 =
         0.07387   -0.00648    0.05151   -0.03253
AFIX 137
H56A  2    0.452358    0.837649    0.351898    11.00000   -1.50000
H56B  2    0.425972    0.743716    0.304345    11.00000   -1.50000
H56C  2    0.479357    0.687084    0.348519    11.00000   -1.50000
AFIX   0
N2    3    0.295080    0.620438    0.506616    11.00000    0.05064    0.02620 =
         0.03042   -0.00035    0.01221    0.00128
H2    2    0.291770    0.683311    0.486741    11.00000    0.03876
O4    4    0.289325    0.389140    0.510627    11.00000    0.06323    0.02698 =
         0.04052    0.00017    0.01555    0.00239
O5    4    0.191594    0.404027    0.321428    11.00000    0.04071    0.07102 =
         0.04141   -0.01152    0.00505    0.00286
O6    4    0.211580    0.162373    0.346172    11.00000    0.06668    0.04787 =
         0.05561   -0.02327    0.03314   -0.02413
S2    5    0.231887    0.302741    0.348404    11.00000    0.04239    0.04241 =
         0.03717   -0.01057    0.01452   -0.00882

C57   1    0.276905    0.978429    0.105613    11.00000    0.04817    0.02648 =
         0.04082    0.00131    0.01108    0.00520
C58   1    0.243102    0.966411    0.049985    11.00000    0.05223    0.02393 =
         0.04125    0.00283    0.01561    0.00199
C59   1    0.198692    1.108781   -0.022872    11.00000    0.04399    0.02993 =
         0.04406    0.00544    0.00773   -0.00692
C60   1    0.214359    1.032348   -0.059984    11.00000    0.05430    0.05356 =
         0.04599    0.00483    0.01696    0.00285
AFIX  43
H60   2    0.241831    0.957681   -0.051657    11.00000   -1.20000
AFIX   0
C61   1    0.189751    1.065831   -0.108752    11.00000    0.06674    0.07530 =
         0.04388    0.00558    0.02206   -0.00259
AFIX  43
H61   2    0.200562    1.012361   -0.133620    11.00000   -1.20000
AFIX   0
C62   1    0.149948    1.174062   -0.123042    11.00000    0.04671    0.08351 =
         0.04921    0.01641    0.00782   -0.01262
C63   1    0.135380    1.249705   -0.085687    11.00000    0.04121    0.05470 =
         0.06206    0.01503    0.00409   -0.00291
AFIX  43
H63   2    0.108381    1.325140   -0.094316    11.00000   -1.20000
AFIX   0
C64   1    0.158677    1.219265   -0.036573    11.00000    0.04663    0.04011 =
         0.04885    0.00251    0.00809    0.00071
AFIX  43
H64   2    0.147637    1.273171   -0.011915    11.00000   -1.20000
AFIX   0
C65   1    0.122450    1.206250   -0.176732    11.00000    0.07655    0.12705 =
         0.05082    0.02713    0.01270   -0.00041
AFIX 137
H65A  2    0.087795    1.145684   -0.189457    11.00000   -1.50000
H65B  2    0.152570    1.191593   -0.195619    11.00000   -1.50000
H65C  2    0.109104    1.302402   -0.180029    11.00000   -1.50000
AFIX   0
C66   1    0.336219    1.054917    0.107477    11.00000    0.05110    0.04051 =
         0.04780    0.00112    0.01172    0.00049
AFIX 137
H66A  2    0.361032    1.057118    0.141602    11.00000   -1.50000
H66B  2    0.327245    1.149260    0.095463    11.00000   -1.50000
H66C  2    0.358167    1.007102    0.086553    11.00000   -1.50000
AFIX   0
C67   1    0.290811    0.829264    0.124192    11.00000    0.06005    0.03367 =
         0.03836    0.00529    0.01919    0.01241
AFIX  23
H67A  2    0.319739    0.789890    0.106953    11.00000   -1.20000
H67B  2    0.253033    0.775462    0.113693    11.00000   -1.20000
AFIX   0
C68   1    0.257559    0.796045    0.214867    11.00000    0.04890    0.04458 =
         0.03522    0.00463    0.01517    0.01258
C69   1    0.218156    0.686341    0.203355    11.00000    0.07318    0.04082 =
         0.04785   -0.00497    0.02828    0.00944
AFIX  43
H69   2    0.225344    0.614577    0.182494    11.00000   -1.20000
AFIX   0
C70   1    0.168169    0.681983    0.222479    11.00000    0.06897    0.04003 =
         0.05123   -0.00736    0.02443    0.00118
AFIX  43
H70   2    0.140591    0.607587    0.213914    11.00000   -1.20000
AFIX   0
C71   1    0.157289    0.784879    0.254216    11.00000    0.05305    0.04287 =
         0.03261   -0.00191    0.01183    0.01234
C72   1    0.198687    0.891938    0.265983    11.00000    0.05393    0.04448 =
         0.03451   -0.00848    0.00986    0.01087
AFIX  43
H72   2    0.192721    0.961983    0.287964    11.00000   -1.20000
AFIX   0
C73   1    0.248578    0.898975    0.246374    11.00000    0.04980    0.04938 =
         0.03411   -0.00304    0.00780    0.01038
AFIX  43
H73   2    0.276150    0.973509    0.254505    11.00000   -1.20000
AFIX   0
C74   1    0.099702    0.783000    0.273139    11.00000    0.05279    0.04993 =
         0.04484   -0.00115    0.01441    0.01565
C75   1    0.076478    0.636346    0.275697    11.00000    0.06173    0.06517 =
         0.07642   -0.00377    0.03118    0.00264
AFIX 137
H75A  2    0.062138    0.599355    0.242180    11.00000   -1.50000
H75B  2    0.043200    0.637312    0.291858    11.00000   -1.50000
H75C  2    0.109209    0.578371    0.294693    11.00000   -1.50000
AFIX   0
C76   1    0.111220    0.847213    0.324638    11.00000    0.06641    0.06866 =
         0.04684   -0.00785    0.02714    0.01558
AFIX 137
H76A  2    0.143519    0.796617    0.347562    11.00000   -1.50000
H76B  2    0.074287    0.842526    0.336165    11.00000   -1.50000
H76C  2    0.123231    0.943616    0.323164    11.00000   -1.50000
AFIX   0
C77   1    0.051463    0.869434    0.236912    11.00000    0.05913    0.07892 =
         0.05887    0.01364    0.01943    0.01903
AFIX 137
H77A  2    0.065647    0.964535    0.236684    11.00000   -1.50000
H77B  2    0.013811    0.868077    0.247460    11.00000   -1.50000
H77C  2    0.044331    0.830517    0.203614    11.00000   -1.50000
AFIX   0
C78   1    0.236067    1.051875    0.133391    11.00000    0.04730    0.03360 =
         0.03434    0.00045    0.00247    0.01056
C79   1    0.255074    1.164816    0.163816    11.00000    0.04917    0.03824 =
         0.04811   -0.00537    0.00231    0.00699
AFIX  43
H79   2    0.294133    1.202359    0.166884    11.00000   -1.20000
AFIX   0
C80   1    0.216577    1.223247    0.189959    11.00000    0.06469    0.04090 =
         0.04436   -0.01438   -0.00113    0.01343
AFIX  43
H80   2    0.230390    1.300156    0.210710    11.00000   -1.20000
AFIX   0
C81   1    0.159421    1.173326    0.186696    11.00000    0.05961    0.04513 =
         0.03484   -0.00567    0.00222    0.01992
C82   1    0.140217    1.061386    0.155004    11.00000    0.04868    0.04934 =
         0.03291   -0.00662    0.00325    0.01306
AFIX  43
H82   2    0.100692    1.025665    0.151097    11.00000   -1.20000
AFIX   0
C83   1    0.178191    1.002122    0.129278    11.00000    0.05428    0.03544 =
         0.03469   -0.00563    0.00556    0.00851
AFIX  43
H83   2    0.164271    0.925641    0.108336    11.00000   -1.20000
AFIX   0
C84   1    0.119724    1.232706    0.216456    11.00000    0.07694    0.06088 =
         0.04887   -0.01382    0.01462    0.02433
AFIX 137
H84A  2    0.129598    1.190577    0.249354    11.00000   -1.50000
H84B  2    0.077410    1.214091    0.199864    11.00000   -1.50000
H84C  2    0.126151    1.332360    0.219650    11.00000   -1.50000
AFIX   0
N3    3    0.224505    1.086545    0.027495    11.00000    0.06357    0.02400 =
         0.03894   -0.00149    0.00943    0.00139
H3    2    0.227563    1.149860    0.045845    11.00000    0.05078
O7    4    0.235467    0.856393    0.027945    11.00000    0.08472    0.02514 =
         0.04395   -0.00057    0.00955    0.00115
O8    4    0.345825    0.665115    0.193428    11.00000    0.08117    0.06799 =
         0.05851    0.02880    0.03879    0.04321
O9    4    0.359115    0.913892    0.211697    11.00000    0.04818    0.08351 =
         0.04718    0.00747    0.00613    0.00611
S3    5    0.321008    0.801882    0.189624    11.00000    0.05491    0.05299 =
         0.04006    0.01148    0.01807    0.02173

C85   1    0.296936    0.504377    0.006237    11.00000    0.04626    0.02704 =
         0.04376   -0.00108    0.01441   -0.00192
C86   1    0.252998    0.469029    0.038855    11.00000    0.03911    0.02571 =
         0.03856   -0.00391    0.00845   -0.00066
C87   1    0.164522    0.563840    0.063960    11.00000    0.03995    0.03804 =
         0.05266   -0.00572    0.01173    0.00649
C88   1    0.151498    0.452154    0.090203    11.00000    0.04751    0.04712 =
         0.06851    0.00844    0.02371    0.01515
AFIX  43
H88   2    0.177046    0.373647    0.095474    11.00000   -1.20000
AFIX   0
C89   1    0.100536    0.455937    0.108832    11.00000    0.05242    0.06750 =
         0.06324    0.00756    0.02456    0.01238
AFIX  43
H89   2    0.091810    0.378476    0.126559    11.00000   -1.20000
AFIX   0
C90   1    0.062562    0.567151    0.102538    11.00000    0.04313    0.06819 =
         0.05777   -0.01052    0.01371    0.01243
C91   1    0.077398    0.679783    0.077243    11.00000    0.04617    0.05487 =
         0.07479   -0.01933    0.00429    0.02129
AFIX  43
H91   2    0.052774    0.759737    0.073343    11.00000   -1.20000
AFIX   0
C92   1    0.126615    0.678378    0.057805    11.00000    0.04973    0.03463 =
         0.06689   -0.00437    0.01246    0.01065
AFIX  43
H92   2    0.134991    0.756021    0.039996    11.00000   -1.20000
AFIX   0
C93   1    0.007286    0.566665    0.122740    11.00000    0.04987    0.10176 =
         0.08447   -0.01548    0.02501    0.01984
AFIX 137
H93A  2   -0.025528    0.517547    0.099810    11.00000   -1.50000
H93B  2   -0.005198    0.661646    0.126575    11.00000   -1.50000
H93C  2    0.016755    0.520488    0.154929    11.00000   -1.50000
AFIX   0
C94   1    0.262826    0.580006   -0.040928    11.00000    0.06010    0.03850 =
         0.04150    0.00058    0.01249    0.00184
AFIX 137
H94A  2    0.227024    0.526810   -0.057353    11.00000   -1.50000
H94B  2    0.289278    0.590159   -0.063289    11.00000   -1.50000
H94C  2    0.250460    0.671195   -0.032167    11.00000   -1.50000
AFIX   0
C95   1    0.316825    0.361856   -0.009502    11.00000    0.04588    0.03213 =
         0.04842   -0.00497    0.01999   -0.00041
AFIX  23
H95A  2    0.281398    0.319916   -0.032725    11.00000   -1.20000
H95B  2    0.327001    0.302725    0.020276    11.00000   -1.20000
AFIX   0
C96   1    0.444170    0.351375    0.011559    11.00000    0.04644    0.04070 =
         0.04452   -0.00369    0.02372   -0.00050
C97   1    0.457141    0.236530    0.041148    11.00000    0.06385    0.03777 =
         0.04830    0.00015    0.02285   -0.00374
AFIX  43
H97   2    0.431017    0.159051    0.034922    11.00000   -1.20000
AFIX   0
C98   1    0.508307    0.234365    0.079943    11.00000    0.07131    0.03760 =
         0.04371    0.00466    0.01576    0.00494
AFIX  43
H98   2    0.516797    0.155110    0.100419    11.00000   -1.20000
AFIX   0
C99   1    0.547695    0.345956    0.089657    11.00000    0.05481    0.04422 =
         0.03807   -0.00096    0.01923    0.01039
C100  1    0.533559    0.460500    0.058704    11.00000    0.04705    0.04284 =
         0.04439   -0.00149    0.02288   -0.00391
AFIX  43
H100  2    0.559868    0.537683    0.064420    11.00000   -1.20000
AFIX   0
C101  1    0.482420    0.464503    0.020067    11.00000    0.04747    0.03816 =
         0.04032    0.00412    0.02186    0.00076
AFIX  43
H101  2    0.473487    0.543606   -0.000449    11.00000   -1.20000
AFIX   0
C102  1    0.604396    0.347713    0.132648    11.00000    0.06183    0.05417 =
         0.03601   -0.00368    0.01486    0.01110
C103  1    0.612586    0.211457    0.160852    11.00000    0.10371    0.06328 =
         0.03862    0.00119    0.00201    0.01967
AFIX 137
H10D  2    0.577989    0.195897    0.174808    11.00000   -1.50000
H10E  2    0.649648    0.214981    0.187592    11.00000   -1.50000
H10F  2    0.615373    0.136115    0.138244    11.00000   -1.50000
AFIX   0
C104  1    0.660325    0.377223    0.113684    11.00000    0.04717    0.12020 =
         0.04308   -0.00259    0.00634    0.01393
AFIX 137
H10G  2    0.664511    0.305661    0.090088    11.00000   -1.50000
H10H  2    0.696257    0.377710    0.141540    11.00000   -1.50000
H10I  2    0.655962    0.467162    0.097301    11.00000   -1.50000
AFIX   0
C105  1    0.597765    0.464756    0.168429    11.00000    0.07336    0.06528 =
         0.04145   -0.00911    0.01331    0.00738
AFIX 137
H10J  2    0.593798    0.553090    0.150989    11.00000   -1.50000
H10K  2    0.633514    0.466847    0.196435    11.00000   -1.50000
H10L  2    0.561785    0.448445    0.180521    11.00000   -1.50000
AFIX   0
C106  1    0.349636    0.585706    0.038307    11.00000    0.04144    0.02956 =
         0.04288   -0.00090    0.01674   -0.00076
C107  1    0.378409    0.542167    0.085404    11.00000    0.04617    0.03080 =
         0.03934    0.00247    0.02149    0.00046
AFIX  43
H107  2    0.365348    0.460107    0.097990    11.00000   -1.20000
AFIX   0
C108  1    0.425929    0.616032    0.114561    11.00000    0.04383    0.04474 =
         0.04100   -0.00223    0.01815    0.00081
AFIX  43
H108  2    0.444893    0.583772    0.146808    11.00000   -1.20000
AFIX   0
C109  1    0.446366    0.736398    0.097521    11.00000    0.04561    0.04253 =
         0.05385   -0.01255    0.02019   -0.00464
C110  1    0.418431    0.778699    0.050471    11.00000    0.05576    0.03708 =
         0.05953   -0.00338    0.02878   -0.01049
AFIX  43
H110  2    0.432190    0.859806    0.037803    11.00000   -1.20000
AFIX   0
C111  1    0.370470    0.705702    0.020894    11.00000    0.06263    0.03177 =
         0.04262    0.00226    0.01979   -0.00528
AFIX  43
H111  2    0.351777    0.737894   -0.011419    11.00000   -1.20000
AFIX   0
C112  1    0.497704    0.817512    0.129901    11.00000    0.05618    0.06091 =
         0.08200   -0.02418    0.01921   -0.01445
AFIX 137
H11C  2    0.481457    0.896516    0.144100    11.00000   -1.50000
H11D  2    0.524519    0.850185    0.110025    11.00000   -1.50000
H11E  2    0.520412    0.758410    0.156564    11.00000   -1.50000
AFIX   0
N4    3    0.213781    0.570170    0.041778    11.00000    0.05108    0.02519 =
         0.05803    0.00412    0.02042    0.00807
H4    2    0.219338    0.649361    0.028438    11.00000    0.06972
O10   4    0.254579    0.359120    0.059761    11.00000    0.04867    0.02502 =
         0.05711    0.00206    0.02317    0.00506
O11   4    0.380179    0.474044   -0.067431    11.00000    0.05583    0.06421 =
         0.03800    0.00449    0.01520   -0.00380
O12   4    0.372875    0.220826   -0.061197    11.00000    0.06407    0.05592 =
         0.05691   -0.02145    0.02246    0.00182
S4    5    0.378417    0.353859   -0.037611    11.00000    0.04706    0.04478 =
         0.04068   -0.00606    0.01819   -0.00118
HKLF 4


REM  nv1802_a.res in P2(1)
REM wR2 = 0.1127, GooF = S = 1.032, Restrained GooF = 1.032 for all data
REM R1 = 0.0411 for 19794 Fo > 4sig(Fo) and 0.0467 for all 22012 data
REM 1229 parameters refined using 1 restraints

END

WGHT      0.0747      0.3999

REM Highest difference peak  0.481,  deepest hole -0.203,  1-sigma level  0.039
Q1    1   0.2003  0.3013  0.3159  11.00000  0.05    0.48
Q2    1   0.2913  0.8042  0.1567  11.00000  0.05    0.48
Q3    1   0.0940 -0.1122  0.5209  11.00000  0.05    0.45
Q4    1   0.3582  0.3830 -0.0702  11.00000  0.05    0.30
Q5    1   0.4087  0.3676 -0.0043  11.00000  0.05    0.27
Q6    1   0.2479  0.3195  0.3861  11.00000  0.05    0.26
Q7    1   0.4083  0.4131 -0.0439  11.00000  0.05    0.25
Q8    1   0.1122  0.6682  0.0137  11.00000  0.05    0.23
Q9    1   0.2343  0.3813  0.0233  11.00000  0.05    0.23
Q10   1   0.2011  0.8720 -0.0076  11.00000  0.05    0.21
Q11   1   0.1493 -0.1511  0.5435  11.00000  0.05    0.21
Q12   1   0.3120  0.6883  0.1644  11.00000  0.05    0.20
Q13   1   0.3916  0.3371  0.1858  11.00000  0.05    0.20
Q14   1   0.1836  1.2265  0.1575  11.00000  0.05    0.20
Q15   1   0.2243  0.8011  0.1812  11.00000  0.05    0.19
Q16   1   0.0619  0.6796  0.0326  11.00000  0.05    0.19
Q17   1   0.1716  0.5520  0.3878  11.00000  0.05    0.19
Q18   1   0.1535  0.5716  0.0206  11.00000  0.05    0.19
Q19   1  -0.0753 -0.1272  0.3879  11.00000  0.05    0.19
Q20   1   0.4209  0.5134 -0.0588  11.00000  0.05    0.19
;
_shelx_res_checksum   77064

_shelx_hkl_file
;
   0 -11   0 21.7261 20.6198  35
   0 -11   1-0.36556 20.4746  35
   0 -11  -1 47.5051 19.7389  35
   0 -11   2 208.267 23.2499  35
   0 -11  -2 180.374 21.6105  35
   0 -11   3 27.1682 21.6428  35
   0 -11   4 281.262 24.9578  35
   0 -11   5 153.507 22.6304  35
   0 -11   5 206.556 20.7194   8
   0 -11   6 91.4626 19.0312   8
   0 -11   6 115.117 21.0566  35
   0 -11   7 126.933 21.1539  35
   0 -11   7 147.892 19.4501   8
   0 -11   8 46.2658 17.8086   8
   0 -11   9 188.427 19.6306   8
   0 -11  10 26.7602 16.8864  35
   0 -11  10 36.2822 16.6013   8
   0 -11  11 26.4910 15.8211   8
   0 -11  11 10.3377 16.0376  35
   0 -10   0 3335.17 146.365  35
   0 -10   0 3569.42 145.444   9
   0 -10   1 3658.06 160.589  35
   0 -10  -1 3862.65 159.256   9
   0 -10   1 4003.71 159.370   9
   0 -10  -1 3701.89 160.082  35
   0 -10   2 577.604 41.4905  35
   0 -10   2 722.732 39.3380   9
   0 -10  -2 639.357 39.8332  35
   0 -10   3 603.338 36.4860   9
   0 -10  -3 578.649 37.1313  35
   0 -10  -4 909.145 46.6697  35
   0 -10   4 912.921 46.5010   9
   0 -10  -5 307.942 27.2665  35
   0 -10   5 264.103 28.5216   9
   0 -10  -6 1071.25 51.0448  35
   0 -10   6 1067.01 51.8580   9
   0 -10   7 37.7721 24.8612   9
   0 -10   8 143.338 24.8542   9
   0 -10   9 287.106 26.9458   9
   0 -10  10 182.184 24.7307   9
   0 -10  10 172.794 27.0156   8
   0 -10  11 125.514 22.7967   9
   0 -10  11 180.922 25.9925   8
   0 -10  12 40.2650 24.0207   8
   0 -10  12 41.5949 20.9048   9
   0 -10  13 197.394 24.7241   8
   0 -10  13 189.780 22.0882   9
   0 -10  14 228.506 22.2467   9
   0 -10  14 317.684 25.3856   8
   0 -10  15 5.83307 17.6859   9
   0 -10  16 171.041 18.1045   9
   0 -10  16 157.242 19.1058  35
   0  -9   0 9.06299 29.2849   9
   0  -9  -1 118.081 30.5674   9
   0  -9   1 99.4033 30.3681   9
   0  -9  -2 1274.27 62.1966   9
   0  -9  -2 1315.81 63.5230  35
   0  -9   2 1282.94 62.8130   9
   0  -9   3 37.9444 30.1023   9
   0  -9  -3 8.40585 28.3099   9
   0  -9  -3 37.9948 29.2840  35
   0  -9  -4 705.763 43.3045   9
   0  -9   4 695.590 44.5608   9
   0  -9  -4 810.700 43.9333  35
   0  -9  -5 193.275 30.8938   9
   0  -9   5 223.642 32.6849   9
   0  -9  -5 244.168 29.8441  35
   0  -9  -6 711.793 44.7809   9
   0  -9   6 829.640 47.0982   9
   0  -9  -6 867.498 44.5601  35
   0  -9   7 881.375 48.2191   9
   0  -9  -7 877.283 44.7453  35
   0  -9  -7 783.316 45.6833   9
   0  -9  -8 642.615 39.1737   9
   0  -9   8 646.613 41.8537   9
   0  -9   9 138.518 30.6914   9
   0  -9  10 1342.75 63.4428   9
   0  -9  10 1275.93 65.7977  23
   0  -9  11 485.013 36.0574   9
   0  -9  11 425.343 39.5303  23
   0  -9  12 880.322 46.7286   9
   0  -9  12 800.955 50.0386  23
   0  -9  13 284.810 31.4264   9
   0  -9  13 277.931 36.0397  23
   0  -9  14 434.017 39.5883  23
   0  -9  14 568.729 35.7823   9
   0  -9  15 111.385 26.0704   9
   0  -9  15 79.3925 31.9791  23
   0  -9  16 49.7772 24.4676   9
   0  -9  16-18.9125 31.5576  23
   0  -9  17 629.186 35.8178   9
   0  -9  17 539.491 40.8226  23
   0  -9  17 627.130 37.0989   8
   0  -9  18 65.5547 24.4319   8
   0  -9  18 76.3782 22.7570   9
   0  -9  18 59.5642 27.6729  23
   0  -9  19-19.8653 21.2550   9
   0  -9  19 6.05710 22.3283   8
   0  -9  19-9.48216 24.3404  23
   0  -9  20 87.9331 19.5025   8
   0  -9  20 65.5704 18.8164   9
   0  -8   0 73.0724 35.2105   9
   0  -8  -1 8599.32 357.514   9
   0  -8   1 8839.08 357.543   9
   0  -8   2 7373.59 296.436   9
   0  -8  -2 7022.78 296.173   9
   0  -8  -3 1033.29 55.0558   9
   0  -8   3 1038.05 55.7163   9
   0  -8  -4 1600.43 78.6928   9
   0  -8   4 1829.91 80.7051  23
   0  -8   4 1750.66 79.4544   9
   0  -8  -5 566.036 37.1992  35
   0  -8   5 475.223 39.2883   9
   0  -8   5 485.027 42.4715  23
   0  -8   6 128.479 37.3806  23
   0  -8   6 181.573 32.6743   9
   0  -8  -6 174.993 28.7184  35
   0  -8   7 557.944 46.0370  23
   0  -8   7 568.585 38.8494  10
   0  -8   7 535.620 40.8731   9
   0  -8  -7 657.873 37.2714  35
   0  -8  -8 289.998 28.3642  35
   0  -8   8 230.882 41.0288  23
   0  -8   8 278.714 32.1497  10
   0  -8   8 270.512 34.6286   9
   0  -8  -9 110.747 24.9515  35
   0  -8   9 120.914 40.5353  23
   0  -8   9 57.3479 29.2805  10
   0  -8   9 127.091 32.6901   9
   0  -8  10 31.0486 31.8620   9
   0  -8  10-21.9226 40.6458  23
   0  -8  10 54.2202 30.0827  10
   0  -8  11 1472.17 71.3166  10
   0  -8  11 1468.64 77.6785  23
   0  -8  11 1617.82 72.5501   9
   0  -8  12 604.169 49.4737  23
   0  -8  12 570.137 41.3259   9
   0  -8  12 586.918 40.5974  10
   0  -8  13 112.873 32.2080   9
   0  -8  13 79.7885 41.4046  23
   0  -8  14 1127.74 55.4801   9
   0  -8  14 912.456 62.0084  23
   0  -8  15 1522.49 70.2824   8
   0  -8  15 1505.87 69.4402   9
   0  -8  16 426.281 36.3763   9
   0  -8  16 322.046 44.5231  23
   0  -8  16 370.813 37.1461   8
   0  -8  17 464.470 37.3597   8
   0  -8  17 440.770 36.4563   9
   0  -8  17 417.672 44.5944  23
   0  -8  18 54.1390 38.8816  23
   0  -8  18 59.5111 28.6914   9
   0  -8  18 61.3087 29.4437   8
   0  -8  19 120.882 29.0414   8
   0  -8  19 62.9168 38.0155  23
   0  -8  19 85.6510 28.5018   9
   0  -8  20 28.6816 36.2998  23
   0  -8  20 49.8997 27.1566   9
   0  -8  20 86.5436 27.5444   8
   0  -8  21 49.4404 18.8640   4
   0  -8  21 31.2785 31.9434  23
   0  -8  21 42.5315 24.7673   8
   0  -8  21 30.3948 25.1310   9
   0  -8  22 42.4548 21.4063   8
   0  -8  22 39.8028 28.2158  23
   0  -8  22 35.6889 19.6110  19
   0  -8  22 54.4727 22.5429   9
   0  -8  23 19.9813 17.1155  19
   0  -8  23-8.64921 19.3632   9
   0  -8  23-3.99210 18.3470   8
   0  -8  23 15.9172 24.3443  23
   0  -7   0-26.4050 26.1220   9
   0  -7   1 226.403 28.2128   9
   0  -7  -1 135.164 27.0470   9
   0  -7   2 1015.24 53.5457   9
   0  -7   2 1143.43 55.2018  23
   0  -7   3 1846.34 81.2727  23
   0  -7   3 1719.15 79.6882   9
   0  -7   4 3836.97 160.539   9
   0  -7   4 3549.28 159.665  10
   0  -7   5 1854.32 86.8068  10
   0  -7   5 2078.34 88.0514   9
   0  -7   5 2049.03 90.3770  23
   0  -7   6 86.3242 35.9154  23
   0  -7  -6 64.2070 24.2219  35
   0  -7   6 80.4910 28.9823   9
   0  -7   6 89.5396 27.7072  10
   0  -7   7 118.556 38.0778  23
   0  -7   7 165.648 29.7537   9
   0  -7   7 141.724 29.2654  10
   0  -7  -7 148.127 24.9106  35
   0  -7   8 58.7083 39.6398  23
   0  -7  -8 20.5276 23.2499  35
   0  -7   8 33.9500 28.8078  10
   0  -7   8 5.49390 29.0542   9
   0  -7   9 1366.96 68.4368  10
   0  -7   9 1442.18 68.9847   9
   0  -7   9 1412.44 74.8290  23
   0  -7  -9 1553.27 65.8168  35
   0  -7  10 307.762 45.3658  23
   0  -7  10 246.155 33.2359  10
   0  -7  10 319.181 34.0652   9
   0  -7  11 304.197 35.3400  10
   0  -7  11 305.941 35.1111   9
   0  -7  11 307.105 46.6419  23
   0  -7  12 97.4500 32.3987  10
   0  -7  12 116.717 46.5678  23
   0  -7  12 81.1913 33.0277   9
   0  -7  13 2569.09 124.561  23
   0  -7  13 2709.60 119.046  10
   0  -7  13 2884.95 119.186   9
   0  -7  14 91.7524 34.1417  10
   0  -7  14 42.7491 33.3585   9
   0  -7  14 40.3802 47.7066  23
   0  -7  15 494.472 39.4882   8
   0  -7  15 505.720 40.1813   9
   0  -7  15 468.165 53.2869  23
   0  -7  16 439.852 39.3546   9
   0  -7  16 460.104 38.3147   8
   0  -7  16 371.912 53.1874  23
   0  -7  17 851.341 50.0420   8
   0  -7  17 755.888 61.8240  23
   0  -7  17 922.356 50.4932   9
   0  -7  18-43.4800 47.5179  23
   0  -7  18-19.9817 32.6870   9
   0  -7  18 29.8936 32.2686   8
   0  -7  19 39.6741 32.2253   8
   0  -7  19 68.6339 45.6690  23
   0  -7  19 67.1970 32.1206   9
   0  -7  20 35.7351 30.9383   8
   0  -7  20 63.2478 32.5922   9
   0  -7  20 16.7997 45.0036  23
   0  -7  21 122.752 31.6301   9
   0  -7  21 119.613 43.8535  23
   0  -7  21 94.6709 30.8695   8
   0  -7  22 748.496 44.9772   9
   0  -7  22 830.578 39.2993   4
   0  -7  22 759.986 43.1147   8
   0  -7  23 36.9953 24.7849   8
   0  -7  23 11.8906 35.5257  23
   0  -7  23 33.3860 26.7619   9
   0  -7  24 520.645 30.8877   8
   0  -7  24 535.822 32.1646  19
   0  -7  24 523.753 33.1975   9
   0  -7  25 35.5688 18.4569   8
   0  -7  25 2.24311 27.3070  23
   0  -7  25 38.0295 20.0156  19
   0  -7  26 76.0315 17.3227  19
   0  -7  26 49.6259 23.1205  23
   0  -6   0 2094.14 87.4268  23
   0  -6   0 1787.12 97.5228   1
   0  -6  -1 1771.56 91.9732   1
   0  -6   1 1786.86 82.5082   9
   0  -6   2 3383.48 145.909   9
   0  -6  -2 3225.67 153.323   1
   0  -6   3 24.1012 28.8428  23
   0  -6   3 15.0445 23.3771   9
   0  -6   4 759.915 42.2507  10
   0  -6   4 885.650 46.6158  23
   0  -6   4 839.537 42.6924   9
   0  -6   5 940.452 46.5503   9
   0  -6   5 1034.32 51.6666  23
   0  -6   5 869.183 46.3249  10
   0  -6   6 1378.68 63.3016   9
   0  -6   6 1457.28 67.5579  23
   0  -6   6 1337.36 63.0967  10
   0  -6   7 98.7666 25.0921  10
   0  -6   7 100.738 25.3560   9
   0  -6  -7 96.5370 20.6908  35
   0  -6   7 138.599 34.8791  23
   0  -6   8 90.9671 26.3969   9
   0  -6   8 81.7521 36.7245  23
   0  -6  -8 120.660 21.3258  35
   0  -6   8 117.616 26.1520  10
   0  -6  -9 237.862 21.9585  35
   0  -6   9 214.148 39.9330  23
   0  -6   9 187.033 28.1115  10
   0  -6   9 234.119 28.0799   9
   0  -6  10 39.3064 39.0409  23
   0  -6  10 12.2917 26.3381   9
   0  -6  10 21.5726 27.6561  10
   0  -6  11 1485.20 78.6867  23
   0  -6  11 1590.49 71.5585   9
   0  -6  11 1571.85 72.1486  10
   0  -6  12 24.6603 30.1123  10
   0  -6  12 53.6602 28.5780   9
   0  -6  12 4.21842 44.0946  23
   0  -6  13 1079.22 55.6145  10
   0  -6  13 1066.93 54.4758   9
   0  -6  13 1013.27 66.0490  23
   0  -6  14 216.224 32.0424   9
   0  -6  14 198.313 34.4772  10
   0  -6  14 260.696 50.0769  23
   0  -6  15 495.975 55.3237  23
   0  -6  15 482.678 39.2143   9
   0  -6  15 480.594 40.6647  10
   0  -6  16 760.776 64.1669  23
   0  -6  16 896.511 50.0469   9
   0  -6  16 839.113 48.5320   8
   0  -6  17 207.492 34.6139   9
   0  -6  17 159.097 32.7723   8
   0  -6  17 152.835 53.3410  23
   0  -6  18 36.3377 33.5550   9
   0  -6  18 20.4981 31.8281   8
   0  -6  18 10.3061 52.7623  23
   0  -6  19 160.339 34.8155   9
   0  -6  19 126.554 53.8891  23
   0  -6  19 101.554 32.2806   8
   0  -6  20 142.947 33.2013   8
   0  -6  21 357.574 35.9927   8
   0  -6  22 70.3466 24.9740   4
   0  -6  22 75.5899 30.8239   8
   0  -6  23 53.7636 22.4145   4
   0  -6  23 101.904 28.2124   8
   0  -6  24 151.945 27.0750   8
   0  -6  25 168.497 28.1977  19
   0  -6  25 202.758 24.6635   8
   0  -6  26 74.7715 20.7271   8
   0  -6  26 122.393 24.4738  19
   0  -6  27 116.047 29.1817  23
   0  -6  27 134.962 22.0373  19
   0  -5   0 12.7311 22.9056  23
   0  -5   0-24.8817 37.8629   1
   0  -5   0 1.61767 60.6513  25
   0  -5   0-0.70538 23.2447  20
   0  -5   1 223.619 63.8733  25
   0  -5  -1 198.382 23.5846  23
   0  -5   1 115.985 73.5622  24
   0  -5   1 196.201 25.6779  23
   0  -5  -1 183.992 26.6960  20
   0  -5  -1 172.482 38.1308   1
   0  -5   1 176.020 41.5643   1
   0  -5   1 157.287 25.2598  20
   0  -5   2 7529.30 305.199  24
   0  -5   2 7151.59 302.020  25
   0  -5   2 7166.11 286.917  23
   0  -5  -2 6884.45 292.144   1
   0  -5   2 7093.32 295.009   1
   0  -5  -2 7164.70 303.119  24
   0  -5   2 6531.09 288.554  20
   0  -5  -2 6844.54 289.878  20
   0  -5   2 7576.06 296.606  21
   0  -5   3 4314.11 179.134  23
   0  -5   3 4223.04 188.269   1
   0  -5  -3 4321.20 196.763  24
   0  -5  -3 4321.21 183.268   1
   0  -5  -3 4046.77 188.236   2
   0  -5  -3 4398.80 182.536  20
   0  -5   3 4509.71 197.032  25
   0  -5   3 4535.08 188.248  21
   0  -5   3 4276.25 200.295  24
   0  -5  -4 280.836 47.4347   2
   0  -5   4 225.328 42.5776  21
   0  -5  -4 267.297 31.7439  20
   0  -5   4 301.246 78.5216  24
   0  -5   4 300.572 31.4091  23
   0  -5  -4 303.476 33.1629   1
   0  -5   4 263.503 47.2820   1
   0  -5  -4 232.066 68.9316  24
   0  -5   5 585.175 38.3930  23
   0  -5  -5 525.973 37.3664   1
   0  -5  -5 518.453 51.9441   2
   0  -5   5 534.271 82.8256  24
   0  -5   5 554.262 52.9706   1
   0  -5   5 591.384 47.3513  21
   0  -5  -5 543.428 71.3111  24
   0  -5  -5 528.312 39.6763  20
   0  -5  -6 7225.03 298.239   2
   0  -5   6 7244.48 296.454  21
   0  -5  -6 6716.85 293.462  20
   0  -5   6 6879.19 305.030  25
   0  -5   6 6937.80 298.816   1
   0  -5   6 7175.98 307.806  24
   0  -5   6 7083.03 289.249  23
   0  -5  -6 7289.38 301.819  24
   0  -5  -6 6999.23 289.731   1
   0  -5  -7 1489.93 81.8446   2
   0  -5  -7 1407.30 72.7253  20
   0  -5   7 1533.96 69.6094  23
   0  -5   7 1415.80 64.9682   9
   0  -5  -7 1482.87 91.4289  24
   0  -5   7 1393.30 75.9974  21
   0  -5  -7 1487.30 63.2619  35
   0  -5   8 2979.49 130.522   9
   0  -5   8 3280.61 133.720  23
   0  -5  -8 2865.57 138.201  20
   0  -5  -8 3220.26 129.387  35
   0  -5  -8 3217.68 149.181  24
   0  -5   9 4833.28 200.709  23
   0  -5  -9 5059.34 196.775  35
   0  -5   9 4611.69 197.835   9
   0  -5   9 4673.64 197.964  10
   0  -5  -9 4537.51 206.351  20
   0  -5  10 3005.29 125.465  10
   0  -5 -10 2875.14 136.307  20
   0  -5  10 2917.40 125.301   9
   0  -5  10 3131.50 130.071  23
   0  -5  11 1372.76 68.5757  23
   0  -5  11 1328.15 61.2302  10
   0  -5  11 1260.57 60.4086   9
   0  -5  12 1483.48 75.0508  23
   0  -5  12 1450.92 67.3291   9
   0  -5  12 1492.36 67.8277  10
   0  -5  13 252.774 29.2628   9
   0  -5  13 261.042 43.8780  23
   0  -5  13 315.712 30.8896  10
   0  -5  14 301.670 32.6378  10
   0  -5  14 263.798 30.3472   9
   0  -5  14 215.700 46.5839  23
   0  -5  15 7557.55 324.184  23
   0  -5  15 8200.25 320.695  10
   0  -5  15 7590.85 319.991   9
   0  -5  16 2516.98 109.050   8
   0  -5  17 1274.65 62.1775   8
   0  -5  18 1163.88 58.2143   8
   0  -5  19 63.4772 30.3735   8
   0  -5  19 47.5756 32.6777  33
   0  -5  20 792.481 51.5504  33
   0  -5  20 914.807 49.3063   8
   0  -5  21 561.328 45.3855  33
   0  -5  21 683.972 43.1869   8
   0  -5  22 120.356 35.6921  33
   0  -5  22 170.772 28.0220   4
   0  -5  22 200.070 57.4154  23
   0  -5  22 199.977 32.6296   8
   0  -5  23 507.878 32.4234   4
   0  -5  23 353.282 57.3521  23
   0  -5  23 482.905 36.1797   8
   0  -5  23 363.850 39.8928  33
   0  -5  24 299.068 30.6547   8
   0  -5  24 285.946 51.1866  23
   0  -5  24 251.459 33.9178  33
   0  -5  25 295.751 28.0724   8
   0  -5  25 255.146 33.6525  19
   0  -5  25 268.648 47.6160  23
   0  -5  25 186.218 30.7817  33
   0  -5  26 75.8285 40.4814  23
   0  -5  26 104.501 29.0644  19
   0  -5  26 41.9206 25.8079  33
   0  -5  26 88.4624 22.7987   8
   0  -5  27 15.6620 26.3918  19
   0  -5  27 25.8134 35.7161  23
   0  -5  27 26.9990 22.8476  33
   0  -5  28 447.457 30.0089  19
   0  -5  28 345.761 35.8807  23
   0  -5  29 36.4945 26.0027  23
   0  -5  29 69.4155 20.5132  19
   0  -4   0 5177.34 213.395  20
   0  -4   0 5187.57 217.106   1
   0  -4   0 5083.43 227.853  24
   0  -4   0 4998.94 224.108  25
   0  -4  -1 1898.82 87.5053   1
   0  -4  -1 1846.20 83.0493  20
   0  -4  -1 1783.08 99.9107  25
   0  -4   1 1928.81 89.7341   1
   0  -4   1 1837.48 82.0616  20
   0  -4   1 1812.31 101.950  25
   0  -4   1 1917.48 109.736  24
   0  -4  -2 8082.40 316.129  20
   0  -4   2 7406.33 315.072  20
   0  -4  -2 7636.31 316.888   1
   0  -4   2 7857.96 319.490   1
   0  -4  -2 7383.33 319.320   2
   0  -4   2 7740.31 327.573  24
   0  -4  -3 715.514 44.0648   1
   0  -4  -3 709.410 54.2434   2
   0  -4   3 657.040 83.1479  24
   0  -4   3 705.116 50.9344  21
   0  -4  -3 626.275 76.0839  24
   0  -4   3 679.854 53.1450   1
   0  -4  -3 685.616 42.2334  20
   0  -4   3 657.020 39.3978  20
   0  -4  -4 6386.25 271.867  24
   0  -4   4 6237.13 258.990  23
   0  -4   4 6222.31 272.373  25
   0  -4  -4 6412.94 261.293   1
   0  -4  -4 6248.41 265.993   2
   0  -4   4 6726.31 266.008  21
   0  -4   4 6521.80 276.694  24
   0  -4   4 6259.26 266.624   1
   0  -4  -4 6141.82 262.413  20
   0  -4  -5 797.045 43.1750   1
   0  -4   5 780.194 54.2351  21
   0  -4   5 800.761 43.9816  23
   0  -4  -5 718.707 56.6869   2
   0  -4  -5 879.204 74.9588  24
   0  -4   5 877.736 78.4351  25
   0  -4  -5 780.849 48.4995  20
   0  -4   5 813.456 87.4386  24
   0  -4   6 3516.59 164.737  25
   0  -4  -6 3482.92 161.187  24
   0  -4   6 3773.12 170.100  24
   0  -4   6 3542.18 145.518  23
   0  -4   6 3537.97 152.202  21
   0  -4  -6 3383.96 144.751   1
   0  -4  -6 3260.64 154.132   2
   0  -4  -6 3417.97 150.538  20
   0  -4  -7 7317.00 299.373   1
   0  -4   7 7349.80 314.257  25
   0  -4  -7 7150.32 307.510   2
   0  -4   7 7299.11 300.684  23
   0  -4  -7 7458.53 309.818  24
   0  -4   7 7526.12 305.771  21
   0  -4   7 7405.98 316.545  24
   0  -4   7 7331.12 308.667   1
   0  -4   8 9667.55 396.298  24
   0  -4   8 9267.97 380.892  23
   0  -4  -8 8835.23 388.637   2
   0  -4  -8 9409.30 389.215  24
   0  -4   8 9491.03 394.190  25
   0  -4   8 9277.36 389.168   1
   0  -4   8 9481.98 386.199  21
   0  -4   9 717.195 44.4828  23
   0  -4   9 767.600 49.0791  21
   0  -4  -9 684.471 48.2225  21
   0  -4   9 673.422 82.9208  24
   0  -4  -9 624.676 56.7064   2
   0  -4  -9 734.446 63.8904  24
   0  -4   9 777.536 75.8764  25
   0  -4   9 619.756 56.7628   1
   0  -4  10 31.6577 35.2594  21
   0  -4  10 3.80112 64.7818  25
   0  -4  10 113.445 76.7348  24
   0  -4  10 24.7656 45.9225   1
   0  -4 -10 93.8060 52.9711  24
   0  -4 -10 109.880 48.8278   2
   0  -4  10 98.9318 35.2934  23
   0  -4 -10 95.2381 36.0565  21
   0  -4 -11 3381.43 147.203  24
   0  -4  11 3193.18 138.874  23
   0  -4  11 3255.89 156.792  25
   0  -4 -11 3234.04 144.265  21
   0  -4  11 3223.76 160.841  24
   0  -4  11 3254.01 135.149   9
   0  -4  11 3228.12 135.632  10
   0  -4  12 4326.67 216.655  24
   0  -4  12 4917.90 196.934  14
   0  -4  12 4620.17 194.023  10
   0  -4  13 3611.78 150.835  10
   0  -4  14 2044.87 86.9986  11
   0  -4  14 1936.27 87.5636  10
   0  -4  15 468.772 32.0966  11
   0  -4  15 440.844 30.8555   8
   0  -4  15 475.138 35.2747  10
   0  -4  16 711.831 41.7172  11
   0  -4  16 719.648 39.5754   8
   0  -4  17 1002.87 51.4758   8
   0  -4  17 1021.02 66.0654  23
   0  -4  17 1108.60 54.1735  11
   0  -4  18 1816.48 96.5584  23
   0  -4  18 1851.23 85.4654   8
   0  -4  18 1962.48 85.3074  13
   0  -4  18 2050.56 87.7967  11
   0  -4  19 788.529 43.9208  13
   0  -4  19 830.124 45.0129   8
   0  -4  19 748.769 48.0933  11
   0  -4  19 741.268 63.9142  23
   0  -4  20 107.858 28.8031  13
   0  -4  20 135.802 34.6641   9
   0  -4  20 114.047 30.9617   8
   0  -4  20 57.1202 34.2768  11
   0  -4  20 115.110 57.2575  23
   0  -4  21 1287.66 65.3476   8
   0  -4  21 1336.81 64.7063  13
   0  -4  21 1413.03 63.0222   4
   0  -4  21 1405.44 67.8325   9
   0  -4  22 143.929 36.5361   9
   0  -4  22 131.917 59.2109  23
   0  -4  22 164.931 27.7947   4
   0  -4  22 127.301 30.2473  13
   0  -4  22 169.713 31.3914   8
   0  -4  23 325.972 38.0038   9
   0  -4  23 303.079 32.2591  13
   0  -4  23 322.434 28.6344   4
   0  -4  23 271.854 32.0190   8
   0  -4  23 253.533 59.0165  23
   0  -4  24 91.1350 27.2758   8
   0  -4  24 73.2262 24.3811   4
   0  -4  24 119.762 28.5746  13
   0  -4  24 84.0604 53.9501  23
   0  -4  24 119.545 34.3823   9
   0  -4  25 711.453 46.5364   9
   0  -4  25 724.327 41.3971  13
   0  -4  25 649.574 60.9168  23
   0  -4  25 743.193 40.8647   8
   0  -4  25 659.280 49.5345  33
   0  -4  26 495.047 41.8716  33
   0  -4  26 511.615 52.4776  23
   0  -4  27 188.919 33.1305  33
   0  -4  27 256.771 43.7578  23
   0  -4  28 108.761 28.3669  33
   0  -4  28 90.7600 37.0419  23
   0  -4  29 34.2471 24.5584  33
   0  -4  29 92.6284 31.9534  23
   0  -4  30 94.1148 26.5862  23
   0  -3   0 7.71632 53.6268  25
   0  -3   0-5.42774 23.5102  20
   0  -3   0-12.8473 35.3679   1
   0  -3   0-45.8685 66.5537  24
   0  -3   1 365.606 70.4062  24
   0  -3   1 348.638 39.1754   1
   0  -3  -1 334.631 29.0467  20
   0  -3   1 259.473 27.0616  20
   0  -3  -1 316.102 36.0015   1
   0  -3  -1 292.817 40.7622   2
   0  -3  -1 357.902 55.7603  25
   0  -3  -2 2888.76 130.743   2
   0  -3  -2 2983.17 127.265   1
   0  -3  -2 2797.65 135.858  25
   0  -3   2 2821.32 125.270  20
   0  -3  -2 3178.86 126.585  20
   0  -3   3 1200.22 81.8600  25
   0  -3  -3 1262.89 59.3784   1
   0  -3  -3 1160.35 66.0830   2
   0  -3   3 1229.04 86.8758  24
   0  -3   3 1214.53 57.8111  20
   0  -3  -3 1294.72 60.1678  20
   0  -3  -4 1854.33 100.372  24
   0  -3  -4 1874.44 81.8204   1
   0  -3   4 2035.52 107.009  24
   0  -3   4 1905.06 101.250  25
   0  -3  -4 1784.87 89.1996   2
   0  -3  -5 301.181 41.7614   2
   0  -3   5 325.717 61.7897  25
   0  -3  -5 325.303 60.2501  24
   0  -3  -5 369.655 26.0528   1
   0  -3  -6 10480.3 425.903   1
   0  -3  -6 10444.1 432.944  24
   0  -3  -6 10531.5 431.735   2
   0  -3   6 10419.0 435.865  25
   0  -3  -7 8304.42 347.537   2
   0  -3   7 8751.65 342.362  23
   0  -3   7 8539.73 352.304  25
   0  -3  -7 8496.72 348.905  24
   0  -3  -7 8219.28 340.554   1
   0  -3  -8 5619.45 241.972  24
   0  -3  -8 5556.38 238.726  21
   0  -3   8 5867.33 235.224  23
   0  -3   8 5796.54 247.919  25
   0  -3  -8 5556.97 241.912   2
   0  -3  -9 817.020 50.9476  21
   0  -3  -9 843.895 62.4945  24
   0  -3  -9 883.335 60.1882   2
   0  -3   9 884.212 76.8642  25
   0  -3  10 2018.24 89.9303  32
   0  -3 -10 2038.80 100.724  24
   0  -3  10 2116.31 111.336  25
   0  -3 -10 2221.61 97.2297  21
   0  -3  11 222.131 29.6665  32
   0  -3 -11 177.719 36.5508  21
   0  -3  11 264.327 62.6398  25
   0  -3 -12 540.471 45.0338  21
   0  -3  12 490.860 69.0658  25
   0  -3  12 510.996 37.7530  32
   0  -3  13 9803.45 412.099  25
   0  -3  13 10354.2 402.593  14
   0  -3  13 9551.53 400.313  10
   0  -3 -13 10129.7 406.911  21
   0  -3  13 9401.92 409.182   1
   0  -3  13 9991.08 402.158  23
   0  -3  13 9672.49 401.383  32
   0  -3  14 2952.06 131.125   8
   0  -3  14 3304.36 134.856  32
   0  -3  14 3095.68 149.614  25
   0  -3  14 3472.17 136.171  14
   0  -3  14 3243.40 136.460  23
   0  -3  14 3133.46 132.488  10
   0  -3  15 3300.74 135.470  11
   0  -3  15 3328.11 138.649  14
   0  -3  15 3208.35 139.096  23
   0  -3  15 3063.45 133.585   8
   0  -3  15 3307.06 137.568  32
   0  -3  15 3082.98 133.952   9
   0  -3  15 3328.31 134.280  13
   0  -3  16 3294.01 140.484  32
   0  -3  16 3269.30 136.550   9
   0  -3  16 3314.31 138.464  11
   0  -3  16 3323.36 142.034  23
   0  -3  16 3065.70 135.993   8
   0  -3  16 3393.92 136.885  13
   0  -3  17 91.9258 23.3004   8
   0  -3  17 115.621 28.9108  11
   0  -3  17 112.189 24.5871  13
   0  -3  17 121.177 43.9583  23
   0  -3  17 98.1760 25.5970   9
   0  -3  18 884.926 46.0085   8
   0  -3  18 928.894 47.0347   9
   0  -3  18 937.458 50.4511  11
   0  -3  18 850.167 60.3379  23
   0  -3  18 840.506 46.7649  13
   0  -3  19 293.521 30.6366  13
   0  -3  19 275.190 30.0469   8
   0  -3  19 315.535 35.6372  11
   0  -3  19 324.274 33.1692   9
   0  -3  19 243.637 50.4120  23
   0  -3  20 710.362 43.5189   9
   0  -3  20 669.542 42.9298  13
   0  -3  20 648.769 40.5438   8
   0  -3  20 659.459 62.3690  23
   0  -3  20 641.699 47.2032  11
   0  -3  20 664.348 38.7512   4
   0  -3  21 275.335 36.2183   9
   0  -3  21 311.921 34.5785  13
   0  -3  21 258.119 57.1151  23
   0  -3  21 297.877 29.6130   4
   0  -3  21 303.081 39.3089  11
   0  -3  21 304.438 31.1101   8
   0  -3  22 512.052 42.0273   9
   0  -3  22 499.750 36.5508   8
   0  -3  22 458.946 45.1931  11
   0  -3  22 514.945 40.5470  13
   0  -3  22 549.216 35.0709   4
   0  -3  22 522.004 63.2832  23
   0  -3  23 993.650 73.3648  23
   0  -3  23 998.421 53.6539   8
   0  -3  23 1122.19 57.9556   9
   0  -3  23 1159.63 52.7686   4
   0  -3  23 1032.01 57.2333  13
   0  -3  24 239.155 57.2170  23
   0  -3  24 254.215 34.8532  13
   0  -3  24 235.795 36.0551   9
   0  -3  24 260.597 37.5220  19
   0  -3  24 281.653 29.4413   8
   0  -3  25 218.038 33.5654  13
   0  -3  25 264.033 54.1632  23
   0  -3  25 258.549 36.8503  19
   0  -3  26 38.7376 35.3111  19
   0  -3  26 56.3696 48.8762  23
   0  -3  26 56.3832 30.4269  13
   0  -3  27 78.4305 43.6744  23
   0  -3  27 33.4313 27.8228  13
   0  -3  27-32.4678 31.8975  19
   0  -3  28 141.008 34.9228  33
   0  -3  28 209.619 31.7492  19
   0  -3  28 200.593 42.0826  23
   0  -3  28 246.975 28.0383  13
   0  -3  29 182.795 23.9109  13
   0  -3  29 170.073 28.9224  19
   0  -3  29 140.384 31.5712  33
   0  -3  29 96.4449 36.1876  23
   0  -3  30 99.0228 26.5489  33
   0  -3  30 162.894 25.0830  19
   0  -3  30 82.3275 31.5486  23
   0  -3  31 70.2411 21.4551  19
   0  -3  31 65.6110 22.0019  33
   0  -3  31 43.5511 25.3895  23
   0  -2   0 29049.5 1203.89  24
   0  -2   0 29848.7 1200.57  20
   0  -2  -1 926.909 52.2305   1
   0  -2   1 1000.85 47.2430  20
   0  -2   1 948.096 79.6801  24
   0  -2  -1 997.162 48.5157  20
   0  -2  -2 99268.4 3979.34  25
   0  -2   2 99204.4 3980.44  25
   0  -2  -2 97714.1 3978.02   1
   0  -2   2 99453.4 3980.41  24
   0  -2   2 97267.7 3977.99  20
   0  -2   3 13253.2 536.435  25
   0  -2  -3 13019.1 531.039   1
   0  -2   3 13070.9 531.704  20
   0  -2  -4 18859.6 763.548   1
   0  -2  -4 19107.8 767.587  24
   0  -2   4 18395.7 768.832  25
   0  -2  -5 6803.52 273.705  24
   0  -2  -5 6519.94 266.193   1
   0  -2   5 6474.45 275.751  25
   0  -2   6 22250.0 942.110  25
   0  -2  -6 23710.0 939.944  24
   0  -2  -7 18162.8 730.732  24
   0  -2   7 17593.7 733.771  25
   0  -2   8 2677.35 124.594  25
   0  -2  -8 2540.30 114.353  21
   0  -2  -8 2685.44 116.920  24
   0  -2  -9 4148.02 178.117  21
   0  -2   9 4164.96 185.075  25
   0  -2   9 4231.99 175.036  23
   0  -2   9 4340.28 177.862  21
   0  -2  10 1531.98 88.4675  25
   0  -2  10 1498.65 71.5042  23
   0  -2  10 1602.94 70.3527  32
   0  -2 -10 1614.38 75.0782  21
   0  -2  10 1567.68 74.0793  21
   0  -2  11 6632.77 274.498  23
   0  -2  11 6624.38 277.431  21
   0  -2  11 6423.20 282.489  25
   0  -2 -11 6689.00 277.885  21
   0  -2  11 6842.17 274.132  32
   0  -2  12 2963.06 125.849  32
   0  -2  12 3098.86 129.881  21
   0  -2  12 2891.84 139.054  25
   0  -2 -12 2781.85 130.021  21
   0  -2  12 3007.13 126.752  23
   0  -2  13 5987.89 257.276  21
   0  -2  13 6165.99 253.531  32
   0  -2  13 6198.92 253.753  23
   0  -2  13 5898.55 262.030  25
   0  -2 -13 6382.20 257.793  21
   0  -2 -14 1158.16 64.3871  21
   0  -2  14 1120.69 61.2064  23
   0  -2 -14 1326.09 70.4360   2
   0  -2  14 1088.03 63.5172  21
   0  -2  14 1184.87 60.1498  32
   0  -2  14 1101.10 76.5879  25
   0  -2  15 2901.61 118.235  32
   0  -2  15 2760.02 115.919  11
   0  -2  15 2528.69 124.256   1
   0  -2  15 2803.41 117.880  14
   0  -2  15 2642.16 113.293   8
   0  -2  15 2704.16 113.656   9
   0  -2  15 2689.29 118.552  23
   0  -2  16 525.993 34.1854  11
   0  -2  16 457.739 43.6466  23
   0  -2  16 439.060 28.6065   8
   0  -2  16 480.972 39.2422  14
   0  -2  16 438.221 30.1360   9
   0  -2  16 541.373 41.5987  32
   0  -2  16 485.520 31.6476  13
   0  -2  17-1.55066 21.2693   8
   0  -2  17 13.9653 39.2514  23
   0  -2  17 4.96434 23.9874  13
   0  -2  17 8.63490 28.1638  11
   0  -2  17-28.2995 33.6915  14
   0  -2  17 9.36324 23.4264   9
   0  -2  17 15.7348 37.1079  32
   0  -2  18 914.372 47.2448   8
   0  -2  18 953.869 49.7991  13
   0  -2  18 963.667 59.9514  23
   0  -2  18 943.381 48.8172   9
   0  -2  18 1074.14 58.8079  32
   0  -2  18 1038.87 47.0887   4
   0  -2  18 977.718 52.7362  11
   0  -2  19 1084.95 51.9411   8
   0  -2  19 1083.53 55.0049  13
   0  -2  19 1091.41 64.9448  32
   0  -2  19 1127.75 51.5624   4
   0  -2  19 1037.45 64.9691  23
   0  -2  19 1052.25 57.7625  11
   0  -2  19 1089.81 54.2540   9
   0  -2  20 29.4966 24.0876   8
   0  -2  20 2.38830 29.2269   9
   0  -2  20-25.2952 46.2617  32
   0  -2  20 62.6673 34.4929  11
   0  -2  20 39.0787 48.5450  23
   0  -2  20 51.9793 30.7783  13
   0  -2  20 6.72788 23.4347   4
   0  -2  21 122.536 52.2211  23
   0  -2  21 160.629 31.6465   9
   0  -2  21 142.203 25.8233   8
   0  -2  21 133.838 38.4707  11
   0  -2  21 142.783 33.5656  13
   0  -2  21 183.612 25.9707   4
   0  -2  22 190.730 40.8916  11
   0  -2  22 154.841 27.8969   8
   0  -2  22 142.446 26.9527   4
   0  -2  22 141.803 35.2517  13
   0  -2  22 191.859 33.8460   9
   0  -2  22 166.743 53.9562  23
   0  -2  23 224.386 37.1554  13
   0  -2  23 213.876 27.6499   4
   0  -2  23 196.796 27.3454   8
   0  -2  23 243.575 41.2039  11
   0  -2  23 207.079 55.9695  23
   0  -2  23 228.443 33.9994   9
   0  -2  23 243.876 36.4194  19
   0  -2  24 376.289 38.9524  19
   0  -2  24 318.221 39.3962  13
   0  -2  24 302.117 56.0094  23
   0  -2  25 75.4674 51.5107  23
   0  -2  25 64.0277 35.3738  13
   0  -2  25 97.6050 34.7054  19
   0  -2  26 745.032 47.7884  13
   0  -2  26 690.122 59.3163  23
   0  -2  26 772.652 48.5254  19
   0  -2  27 19.7158 32.1943  13
   0  -2  27 51.1602 46.1943  23
   0  -2  27 53.5563 33.5307  19
   0  -2  28 8.33911 41.1772  23
   0  -2  28 2.39539 30.9035  13
   0  -2  28 51.8375 31.8268  19
   0  -2  29 257.910 40.2356  23
   0  -2  29 341.387 32.5887  19
   0  -2  29 295.998 31.6011  13
   0  -2  30 232.784 26.7287  13
   0  -2  30 147.137 34.1928  23
   0  -2  30 142.536 27.9761  19
   0  -2  31 75.5880 27.0561  33
   0  -2  31 90.5668 27.8761  23
   0  -2  31 154.229 24.6394  19
   0  -2  32 190.762 23.8897  33
   0  -2  32 288.904 23.2367  19
   0  -1   0 5.49134 32.3581  24
   0  -1   0 4.63389 26.3907  25
   0  -1  -1 393.361 35.8407  24
   0  -1   1 347.426 33.2018  25
   0  -1   2 23005.1 933.484  25
   0  -1   3 6265.98 245.186  25
   0  -1  -3 5886.53 240.343   1
   0  -1   4 13294.0 542.341  25
   0  -1   5 4886.73 205.112  25
   0  -1  -5 4821.82 201.719  24
   0  -1   6 32270.0 1310.13  25
   0  -1   7 10980.0 450.480  25
   0  -1  -8 7310.54 302.852   2
   0  -1   8 7448.62 301.275  21
   0  -1   8 7143.72 304.788  25
   0  -1  -9 25415.5 1032.87   2
   0  -1   9 24594.9 1033.02  25
   0  -1   9 26041.0 1031.97  21
   0  -1  10 393.762 54.2220  25
   0  -1 -10 652.054 44.3132   2
   0  -1  11 7048.82 299.126  25
   0  -1  11 7333.74 296.850  21
   0  -1 -11 7113.27 298.334   2
   0  -1  12 379.697 52.4360  25
   0  -1 -12 391.597 44.1028   2
   0  -1 -12 409.711 39.2366  21
   0  -1  12 434.594 38.3571  21
   0  -1  13 1543.25 83.2573  25
   0  -1  13 1580.60 76.5065  21
   0  -1 -13 1555.84 80.7387   2
   0  -1 -13 1620.19 77.1202  21
   0  -1 -14 2169.27 102.964   2
   0  -1  14 2091.09 99.3897  21
   0  -1 -14 2225.18 99.8825  21
   0  -1 -15 3926.04 169.997   2
   0  -1  15 3860.40 161.507  11
   0  -1 -15 3847.26 167.740  21
   0  -1  15 3917.04 167.903  21
   0  -1  15 3730.84 159.465   9
   0  -1  15 4094.31 162.903  14
   0  -1  16 242.674 22.0796   8
   0  -1  16 242.084 26.9187  13
   0  -1  16 259.689 30.0673  11
   0  -1  16 249.127 33.5615  14
   0  -1  16 266.458 25.1084   9
   0  -1  17 2107.46 95.3921  23
   0  -1  17 2034.67 90.9080  13
   0  -1  17 1927.18 92.1860  11
   0  -1  17 2221.22 88.5663   4
   0  -1  17 2086.60 89.5232   9
   0  -1  17 2048.08 88.4122   8
   0  -1  17 2087.19 94.5236  14
   0  -1  18 1281.57 59.0647   9
   0  -1  18 1337.77 57.5542   4
   0  -1  18 1337.28 68.2928  23
   0  -1  18 1209.19 57.1533   8
   0  -1  18 1200.59 62.9876  11
   0  -1  18 1254.97 61.1193  13
   0  -1  19 578.152 32.6149   4
   0  -1  19 553.371 49.1537  23
   0  -1  19 538.614 38.3533  13
   0  -1  19 540.165 35.4662   9
   0  -1  19 544.400 31.8454   8
   0  -1  20 981.769 45.1373   4
   0  -1  20 816.889 44.1051   8
   0  -1  20 866.914 59.8701  23
   0  -1  20 921.875 50.7218  13
   0  -1  20 908.970 47.4658   9
   0  -1  21 1064.59 49.6821   4
   0  -1  21 913.550 55.3593  13
   0  -1  21 1031.64 51.7004   9
   0  -1  21 967.526 48.5272   8
   0  -1  21 1005.19 64.7691  23
   0  -1  21 1027.41 53.0539  19
   0  -1  22 1440.45 80.2849  23
   0  -1  22 1411.79 69.9516  19
   0  -1  22 1466.52 72.2933  13
   0  -1  22 1479.77 66.5256   4
   0  -1  23 22.7850 31.9843  19
   0  -1  23 21.6790 36.4083  13
   0  -1  23 54.7530 26.1473   4
   0  -1  23 32.4223 49.7120  23
   0  -1  24 702.830 46.3897  19
   0  -1  24 681.427 49.8620  13
   0  -1  24 751.445 59.8401  23
   0  -1  25 203.466 39.3982  13
   0  -1  25 223.504 49.2963  23
   0  -1  25 235.822 35.7001  19
   0  -1  26 44.8037 36.9460  13
   0  -1  26 0.78351 45.2582  23
   0  -1  26 15.7537 33.8128  19
   0  -1  27 397.406 37.7911  19
   0  -1  27 313.243 47.0505  23
   0  -1  27 324.455 40.2997  13
   0  -1  28 391.148 35.9101  19
   0  -1  28 289.504 44.1795  23
   0  -1  28 356.810 38.3892  13
   0  -1  29 77.9639 30.6605  13
   0  -1  29 79.7527 30.1165  19
   0  -1  29 47.2047 35.5980  23
   0  -1  30 1.33963 31.6503  33
   0  -1  30 21.7397 31.7395  23
   0  -1  30-6.81271 27.8217  13
   0  -1  30 7.25750 27.7907  19
   0  -1  31 143.801 28.6226  33
   0  -1  31 170.626 25.8470  19
   0  -1  31 191.425 29.4781  12
   0  -1  32 110.082 21.9581  19
   0  -1  32 89.6517 23.6720  33
   0   0  -2 92079.0 3725.88  21
   0   0  -3 60.4205 13.0765  21
   0   0   4 9898.13 402.730  25
   0   0  -4 9921.36 402.808  21
   0   0   5 9383.23 373.484  25
   0   0  -5 8957.49 373.417  21
   0   0  -6 3471.66 144.207  21
   0   0   6 3353.03 145.403  25
   0   0   7 12609.2 504.046  25
   0   0  -7 12129.9 504.136  21
   0   0   8 13233.6 544.423  25
   0   0   8 13508.5 544.749  21
   0   0   9 200.681 28.5520  21
   0   0   9 230.389 38.0374  25
   0   0  -9 167.017 33.0402   2
   0   0  10 53.0033 36.4204  25
   0   0 -10 71.2205 32.7161   2
   0   0  10 63.6075 27.9682  21
   0   0  10 56.2847 41.4036  24
   0   0  11 4450.09 185.624  32
   0   0 -11 4572.76 190.129   2
   0   0  11 4540.81 190.337  24
   0   0  11 4403.59 189.061  21
   0   0  11 4560.20 188.485  25
   0   0  12 202.286 41.6962  25
   0   0 -12 286.102 41.4394   2
   0   0  12 183.511 31.3773  32
   0   0  12 191.127 49.6486  24
   0   0  12 222.669 36.2965  21
   0   0  13 69213.2 2899.07  21
   0   0  13 71935.4 2895.52  32
   0   0  13 68348.8 2896.52  25
   0   0  13 76415.3 2898.35  24
   0   0 -13 72738.8 2899.85   2
   0   0  14 1586.99 73.9464  32
   0   0  14 1505.60 77.9854  21
   0   0 -14 1636.48 82.5908   2
   0   0  14 1573.76 85.7520  24
   0   0 -15 1067.60 63.0543   2
   0   0  15 941.165 57.1930  21
   0   0  15 1037.72 54.6526  32
   0   0  16 55.7357 21.2677   9
   0   0  16 55.1059 25.8625  11
   0   0  16 60.8747 24.9677  13
   0   0  16 81.0644 35.1730  32
   0   0  16 34.7691 29.8807  14
   0   0  17 73.3372 21.8571   9
   0   0 -17 91.6984 27.3171   7
   0   0  17 38.1611 25.7494  13
   0   0  17 55.3611 17.4432   8
   0   0  17 91.7255 20.3379   4
   0   0  17 43.7542 26.5404  11
   0   0  17 75.2153 36.0000  32
   0   0  18-10.3932 28.9378  11
   0   0  18-2.14137 20.9191   4
   0   0 -18 23.3253 28.9149   7
   0   0  18 19.9597 38.1909  32
   0   0  18-0.55880 26.9673  13
   0   0  18 10.0464 23.6823  19
   0   0 -19 78.4384 30.7900   7
   0   0  19 48.3644 31.6187  11
   0   0  19 56.2693 29.7511  13
   0   0  19 73.5761 25.8485  19
   0   0  19 87.3820 22.8662   4
   0   0  19 30.8599 40.3367  32
   0   0  20 47.0476 44.3788  32
   0   0  20 10.4151 31.3946  13
   0   0  20 8.82167 26.3951  19
   0   0 -20 59.0459 32.5230   7
   0   0  20 29.3131 33.7848  11
   0   0  20 44.4366 40.9686  23
   0   0  20 8.23505 23.5299   4
   0   0 -21 221.266 35.5598   7
   0   0  21 247.663 30.7712  19
   0   0  21 155.619 36.9983  11
   0   0  21 191.462 35.9389  13
   0   0  21 239.087 48.2647  32
   0   0  21 207.847 44.4187  23
   0   0  21 240.047 27.1645   4
   0   0  22 441.606 32.7373   4
   0   0 -22 513.082 40.5328   7
   0   0  22 403.616 36.8211  19
   0   0  22 419.752 49.8487  23
   0   0  22 428.069 42.1451  13
   0   0  22 409.093 45.3182  11
   0   0  22 552.724 55.3102  32
   0   0  23 396.324 42.5867  13
   0   0  23 424.132 37.3960  19
   0   0  23 428.365 55.5392  32
   0   0  23 346.043 49.6020  23
   0   0  23 360.018 32.4928   4
   0   0 -23 403.529 39.7074   7
   0   0  24 314.208 48.9246  23
   0   0  24 261.085 42.4140  13
   0   0 -24 372.394 39.0463   7
   0   0  24 352.134 36.8711  19
   0   0  25 24.3432 39.4498  13
   0   0  25 57.2496 44.4769  23
   0   0  25-5.09778 32.9517  19
   0   0 -25-9.90733 34.2855   7
   0   0  26 197.403 34.3538  19
   0   0  26 165.402 39.4344  13
   0   0 -26 151.602 34.8967   7
   0   0  26 131.333 43.6076  23
   0   0  27 41.6670 37.8205  13
   0   0  27 82.3355 32.6397  19
   0   0  27 73.3110 41.1755  23
   0   0 -27 65.0682 32.1249   7
   0   0  28-22.9480 31.0299  19
   0   0  28 4.88600 35.7759  13
   0   0  28-32.9697 37.0484  23
   0   0  29 8.27167 32.9067  13
   0   0  29 0.54286 29.1661  19
   0   0  30 87.0627 27.9009  19
   0   0  30 70.3370 30.7971  13
   0   0  30 111.832 32.2821  12
   0   0  31 550.636 36.2004  12
   0   0  31 473.200 32.1007  19
   0   0  32 186.699 25.6601  33
   0   0  32 253.548 27.1189  12
   0   1   0 14.2289 16.6623   2
   0   1   1 417.198 24.8411   2
   0   1  -1 370.706 20.2529  20
   0   1  -2 21743.1 906.784  20
   0   1   2 23204.9 907.078   2
   0   1   2 22317.4 907.073  25
   0   1   3 6360.77 259.934  25
   0   1   3 6479.59 262.324  24
   0   1   3 6313.99 258.181   1
   0   1   3 6563.23 260.273   2
   0   1  -3 6222.11 260.374  21
   0   1  -3 6396.44 259.984  20
   0   1   4 12132.6 507.519   1
   0   1   4 12742.0 510.809  24
   0   1  -4 12754.1 510.145  20
   0   1   4 13606.7 510.213   2
   0   1  -4 13293.6 510.046  21
   0   1   5 4628.84 181.662  24
   0   1   5 4633.43 178.560   2
   0   1   5 4098.83 173.346   1
   0   1  -5 4680.57 181.156  25
   0   1  -5 4583.83 177.984  21
   0   1   6 29975.7 1240.26   1
   0   1   6 31211.1 1243.31  24
   0   1  -6 32250.7 1243.65  25
   0   1  -6 32110.2 1243.24  21
   0   1  -7 10633.0 435.140  21
   0   1  -7 11374.4 436.011  25
   0   1   7 11205.4 436.068  24
   0   1   7 10404.1 431.598   1
   0   1   8 5594.48 249.331  25
   0   1  -8 6497.84 253.722  21
   0   1   8 6300.64 255.285  24
   0   1   8 6314.01 248.891   1
   0   1  -8 6405.57 254.638  25
   0   1   9 23177.8 973.710   1
   0   1  -9 24497.8 977.410  21
   0   1  -9 26132.7 977.100  25
   0   1   9 23922.3 973.930  25
   0   1   9 24930.5 977.248  24
   0   1 -10 484.539 38.6875  21
   0   1  10 336.423 25.4551  25
   0   1  10 428.595 52.9905  24
   0   1  11 6446.90 254.732  32
   0   1  11 5817.72 253.215  25
   0   1  11 5835.15 253.174   1
   0   1 -11 6386.72 259.312  21
   0   1  11 6685.76 261.014  24
   0   1  11 6696.43 254.180  34
   0   1  11 6509.27 254.407  29
   0   1  12 338.820 55.4338  24
   0   1  12 329.022 31.9671  32
   0   1  12 379.334 30.4500  29
   0   1  12 336.907 21.4750   1
   0   1  12 412.405 28.4052  34
   0   1 -12 374.103 39.8496  21
   0   1  13 1531.14 84.6324  24
   0   1  13 1440.32 69.4526  32
   0   1  13 1610.30 68.9842  29
   0   1 -13 1384.56 76.6984  21
   0   1  13 1505.06 67.3812  34
   0   1 -14 2063.06 98.2048   2
   0   1  14 2173.85 91.3404  32
   0   1  14 1971.50 89.6792  34
   0   1 -14 1874.14 100.977  20
   0   1  14 2236.78 104.131  24
   0   1  15 4170.76 163.972  32
   0   1  15 3820.61 162.184  13
   0   1 -15 3660.26 174.019  20
   0   1 -15 3741.31 170.326   2
   0   1  15 3897.72 162.792  11
   0   1  16 249.475 36.3224  32
   0   1  16 254.295 24.5285  19
   0   1  16 228.304 29.3209  11
   0   1  16 201.895 28.4991  13
   0   1  17 2021.52 88.5438  19
   0   1  17 2099.59 88.0235   4
   0   1  17 2021.99 91.0920  11
   0   1 -17 2011.70 88.3458   6
   0   1  17 2217.10 93.6448  32
   0   1  17 2012.02 90.3637  13
   0   1  18 1447.83 70.6967  32
   0   1  18 1401.10 62.1790   4
   0   1  18 1288.95 62.6214  19
   0   1 -18 1435.42 62.8408   6
   0   1  18 1248.79 66.0124  11
   0   1  19 514.940 40.8058  11
   0   1  19 527.583 35.4714  19
   0   1 -19 569.571 36.1549   6
   0   1 -19 553.869 41.1730   7
   0   1  19 504.793 47.0871  32
   0   1  19 580.817 34.4064   4
   0   1  20 1113.90 64.5049  32
   0   1 -20 1109.31 57.6126   7
   0   1  20 1119.30 52.2802   4
   0   1  20 1000.51 53.2164  19
   0   1 -20 1061.40 52.6861   6
   0   1  20 944.678 58.2966  11
   0   1  21 817.493 47.2477  19
   0   1  21 890.271 60.4003  32
   0   1  21 871.283 45.4291   4
   0   1  21 761.127 52.5337  11
   0   1 -21 845.453 45.9227   6
   0   1 -21 952.740 53.1147   7
   0   1  21 765.973 55.6360  23
   0   1  22 1308.55 69.7381  23
   0   1  22 1241.51 61.2668   4
   0   1  22 1339.86 74.6447  32
   0   1  22 1294.11 63.5898  19
   0   1 -22 1294.40 61.4581   6
   0   1 -22 1286.25 67.9408   7
   0   1  23 3.47117 41.8077  23
   0   1 -23 69.9137 39.4373   7
   0   1  23 40.7748 50.6970  32
   0   1 -23 18.4995 27.6182   6
   0   1  23-3.48387 27.9255   4
   0   1  23 4.92206 32.2780  19
   0   1 -24 804.441 44.9975   6
   0   1  24 721.432 56.1627  23
   0   1 -24 792.820 53.3913   7
   0   1  24 880.239 63.1098  32
   0   1  24 899.038 49.4324  19
   0   1 -25 254.335 40.3794   7
   0   1  25 126.836 41.5266  23
   0   1  25 205.135 34.8839  19
   0   1  26 46.5850 33.0652  19
   0   1 -26 10.0619 37.3063   7
   0   1  27 310.723 37.3209  19
   0   1 -27 362.840 40.4096   7
   0   1  27 426.712 43.3542  12
   0   1 -28 323.138 37.7930   7
   0   1  28 403.929 42.4297  12
   0   1  28 405.880 36.0162  19
   0   1  29 16.4864 28.8964  19
   0   1 -29 29.3396 30.5198   7
   0   1  29 90.0300 36.3821  12
   0   1  30 38.0688 31.9398  12
   0   1 -30 4.36032 25.6224   7
   0   1  31 120.348 27.6613  33
   0   1  31 223.074 29.9377  12
   0   1  32 95.7757 23.3745  33
   0   1 -32 155.585 26.6554   3
   0   1  32 168.084 25.3799  12
   0   2   0 27129.5 1075.27  25
   0   2   0 26008.9 1073.66   2
   0   2   1 796.618 52.2583   2
   0   2  -1 947.097 43.8729  20
   0   2   1 925.375 66.4870  25
   0   2  -1 822.117 52.9186   2
   0   2   2 102657. 4109.80  25
   0   2  -2 106384. 4108.55  20
   0   2   2 98740.9 4109.19   2
   0   2  -2 96692.5 4109.36   2
   0   2   3 13148.2 548.923  24
   0   2   3 12664.7 544.861   2
   0   2   3 13572.5 546.016  25
   0   2  -3 13894.5 544.029  20
   0   2   4 18208.0 746.052  25
   0   2  -4 18240.7 745.100  20
   0   2   4 18376.0 748.689  24
   0   2   4 18563.2 745.866   2
   0   2  -5 5709.85 245.082  20
   0   2   5 6049.60 246.446   2
   0   2   5 6051.27 251.967  24
   0   2   5 6088.14 246.354  25
   0   2   6 21820.5 893.609  25
   0   2  -6 21428.1 894.584  20
   0   2   6 22225.1 896.753  24
   0   2  -6 21768.5 895.652  21
   0   2   6 23239.6 895.202   2
   0   2  -6 21677.3 896.873  25
   0   2  -7 17787.3 726.401  21
   0   2   7 17721.6 725.555   2
   0   2  -7 17836.0 725.736  20
   0   2  -7 17769.6 727.275  25
   0   2   7 17558.5 727.412  24
   0   2   7 18014.6 723.749  25
   0   2  -8 2189.16 100.070  20
   0   2   8 2349.23 111.264  24
   0   2  -8 2212.38 106.520  25
   0   2  -8 2324.78 101.745  21
   0   2   8 2167.58 96.0325  25
   0   2  -9 4079.06 176.767  25
   0   2  -9 4084.16 174.101  21
   0   2   9 4370.47 179.115  24
   0   2  -9 4130.42 174.127  20
   0   2   9 3998.81 168.020  25
   0   2  10 1591.61 85.4753  24
   0   2  10 1272.85 60.7738  25
   0   2 -10 1410.72 79.3410  25
   0   2 -10 1555.34 74.3369  21
   0   2  10 1529.75 63.7329  34
   0   2 -10 1384.54 73.4394  20
   0   2  10 1535.91 64.3737  29
   0   2  10 1634.45 63.5945  30
   0   2  11 6509.16 268.862  24
   0   2 -11 6184.95 266.472  25
   0   2  11 6530.49 259.391  30
   0   2  11 6318.23 259.666  29
   0   2  11 6102.40 259.785  32
   0   2 -11 6255.33 266.264  21
   0   2  11 6355.63 259.620  34
   0   2 -11 6558.39 266.371  20
   0   2 -12 2862.67 133.764  21
   0   2  12 3034.31 125.892  29
   0   2  12 3001.24 125.574  34
   0   2  12 3117.27 125.124  30
   0   2 -12 2883.17 134.253  20
   0   2  12 2852.08 126.099  32
   0   2  12 2979.05 140.835  24
   0   2 -13 5256.65 230.496  20
   0   2  13 5624.78 221.897  30
   0   2  13 5407.64 222.393  29
   0   2  13 5269.00 222.500  32
   0   2 -13 5040.59 229.508  21
   0   2  13 5400.66 222.083  34
   0   2  13 5480.86 232.809  24
   0   2  14 1276.01 62.5798  32
   0   2  14 1318.34 62.0900  29
   0   2  14 1354.38 61.1942  34
   0   2 -14 1180.24 73.1894  21
   0   2 -14 1151.28 72.6883  20
   0   2  15 2971.98 120.763  34
   0   2  15 2951.60 121.743  32
   0   2  15 2831.26 120.441  13
   0   2  15 2751.65 118.803  19
   0   2 -15 2943.76 132.125  20
   0   2  15 2856.83 120.962  11
   0   2 -15 2731.20 119.082   6
   0   2  16 435.329 29.6694  19
   0   2  16 392.193 34.4549  11
   0   2  16 475.871 35.8517  34
   0   2  16 553.581 39.2028  32
   0   2 -16 468.847 31.1791   6
   0   2  16 452.143 29.8237   4
   0   2  16 428.678 33.4101  13
   0   2  17 37.3931 23.0831  19
   0   2  17 4.07399 35.0564  32
   0   2  17-3.23558 22.9476   4
   0   2  17 13.8292 27.4183  13
   0   2 -17-35.0632 25.0462   6
   0   2  17 6.79323 28.6541  11
   0   2  18 977.996 54.0160  11
   0   2  18 1014.23 53.3096  13
   0   2 -18 990.470 50.2954   6
   0   2  18 1120.73 58.0658  32
   0   2  18 973.582 49.6508  19
   0   2  18 980.666 50.1274   4
   0   2  19 809.814 49.5794  13
   0   2 -19 857.745 46.7686   6
   0   2  19 922.314 55.6588  32
   0   2  19 865.905 45.8937  19
   0   2  19 854.145 45.4827   4
   0   2 -20 63.1658 30.5050   6
   0   2  20 13.0075 27.9677  19
   0   2  20 36.1962 43.2125  32
   0   2 -20 51.4859 38.2373   7
   0   2  20 66.0314 34.6181  13
   0   2 -21 250.070 42.4345   7
   0   2  21 301.702 47.4260  32
   0   2  21 198.645 38.1545  13
   0   2  21 197.477 31.9589  19
   0   2 -21 231.652 34.2719   6
   0   2  22 205.669 48.3930  32
   0   2  22 169.554 40.1758  13
   0   2 -22 132.187 44.4599   7
   0   2 -22 133.434 33.3323   6
   0   2  22 145.804 33.1414  19
   0   2 -23 207.856 33.2707   6
   0   2 -23 208.517 45.3380   7
   0   2  23 226.327 41.0603  13
   0   2  23 257.895 49.3079  32
   0   2  23 219.525 34.8073  19
   0   2  24 304.652 42.9995  12
   0   2 -24 320.138 45.9287   7
   0   2  24 318.702 36.7753  19
   0   2 -24 279.951 33.9533   6
   0   2  24 350.540 43.6794  13
   0   2  25 118.357 40.5681  13
   0   2 -25 118.781 30.2067   6
   0   2 -25 170.252 42.7125   7
   0   2  25 159.440 41.3210  12
   0   2  25 122.819 33.1705  19
   0   2  26 572.221 43.6992  19
   0   2 -26 673.409 40.1848   6
   0   2 -26 666.433 50.0500   7
   0   2  26 606.654 50.1604  13
   0   2  26 724.020 50.7695  12
   0   2  27 69.0528 39.0867  13
   0   2  27 86.4482 39.8960  12
   0   2 -27 86.5577 26.2576   6
   0   2 -27 96.1886 39.6354   7
   0   2  27 77.9489 31.5078  19
   0   2  28 60.7650 37.5293  12
   0   2  28 9.55186 36.2770  13
   0   2 -28 4.04874 35.0880   7
   0   2 -29 389.369 37.8639   7
   0   2  29 439.795 39.9725  12
   0   2 -30 102.824 29.2656   7
   0   2  30 130.857 28.6219  33
   0   2  31 93.5641 24.2129  33
   0   2  31 145.019 27.9048  12
   0   2 -31 112.140 23.9129   7
   0   2  32 291.298 26.7792  12
   0   3   0-3.09391 36.5132   2
   0   3   0-0.84428 53.4387  25
   0   3   1 280.503 55.0597  25
   0   3   1 303.700 38.3289   2
   0   3  -1 436.288 57.6318  25
   0   3  -1 340.836 40.9221   2
   0   3  -2 2715.80 125.226   2
   0   3  -2 2859.01 131.277  25
   0   3   2 2951.51 124.764   2
   0   3   2 2917.14 130.742  25
   0   3   3 1305.76 76.0229  25
   0   3  -3 1323.13 76.8411  25
   0   3  -3 1242.91 68.9964   2
   0   3  -3 1445.68 62.2808  20
   0   3   3 1340.36 67.3330   2
   0   3   3 1279.50 89.7233  24
   0   3  -4 2118.70 100.790   2
   0   3   4 2231.19 99.0820   2
   0   3  -4 2325.75 95.8401  20
   0   3   4 2215.75 116.353  24
   0   3   4 1956.83 104.604  25
   0   3  -4 2188.60 107.829  25
   0   3   5 436.781 40.2150   2
   0   3  -5 427.010 32.4560  20
   0   3   5 424.905 69.2991  24
   0   3   5 395.755 48.8339  25
   0   3   6 10567.9 439.632  24
   0   3  -6 10578.6 432.765  20
   0   3   6 10139.7 434.031  25
   0   3   6 11000.0 434.410   2
   0   3   7 8685.63 344.647   2
   0   3   7 8219.82 339.571  31
   0   3  -7 8337.48 343.455  20
   0   3   7 8873.50 351.094  24
   0   3  -7 8387.41 348.583  25
   0   3   7 8188.11 343.597  25
   0   3   8 5762.43 237.357  30
   0   3   8 6146.43 251.495  24
   0   3   8 5551.82 241.684  25
   0   3  -8 6023.57 249.132  25
   0   3   8 6207.13 244.265   2
   0   3  -8 5509.59 242.174  20
   0   3   8 5846.16 237.563  31
   0   3   9 940.091 79.2244  24
   0   3   9 936.589 56.3323   2
   0   3  -9 785.951 50.5477  20
   0   3   9 903.367 43.7468  31
   0   3   9 877.235 42.7423  30
   0   3   9 900.070 51.2406  25
   0   3  -9 820.257 68.8201  25
   0   3   9 892.494 42.9610  34
   0   3 -10 1862.48 105.171  25
   0   3 -10 2056.17 95.9296  20
   0   3  10 2121.01 88.2961  29
   0   3  10 2032.90 88.4100  30
   0   3  10 2172.40 113.488  24
   0   3  10 2054.01 88.3666  34
   0   3 -11 91.6037 34.5216  20
   0   3  11 123.992 66.8074  24
   0   3  11 130.823 24.8094  29
   0   3 -11 112.332 52.3071  25
   0   3  11 160.014 25.3208  34
   0   3  11 152.836 24.4124  30
   0   3 -12 546.077 59.8685  25
   0   3  12 575.131 36.1470  34
   0   3  12 530.474 72.7936  24
   0   3 -12 502.399 45.1106  20
   0   3  12 646.651 35.8190  30
   0   3  12 534.667 36.1187  29
   0   3  12 556.508 36.5273  32
   0   3  13 10012.5 406.171  32
   0   3  13 9705.68 406.213  29
   0   3  13 9951.82 406.258  34
   0   3 -13 9724.93 413.367  20
   0   3 -13 9973.99 414.456  25
   0   3  13 10659.4 406.155  30
   0   3 -13 9382.51 405.604   6
   0   3  13 10248.6 406.563  12
   0   3 -14 3096.80 136.092   6
   0   3 -14 3202.16 145.615  20
   0   3  14 3394.48 137.460  32
   0   3  14 3558.51 136.984  30
   0   3  14 3147.77 137.063  13
   0   3  14 3030.56 135.590  19
   0   3  14 3222.07 137.422  12
   0   3  14 3463.95 137.294  34
   0   3  15 2653.76 117.491  19
   0   3  15 3030.75 119.637  12
   0   3  15 2851.22 119.747  32
   0   3  15 2908.01 119.239  34
   0   3  15 2721.29 119.313  13
   0   3 -15 2669.04 118.057   6
   0   3  16 2970.05 135.754  19
   0   3 -16 3207.47 136.347   6
   0   3  16 3125.89 137.491  13
   0   3  16 3403.76 138.248  32
   0   3  16 3480.80 137.764  12
   0   3  16 3373.37 137.854  34
   0   3  17 160.966 31.1965  12
   0   3 -17 150.812 29.0838   6
   0   3  17 121.853 30.9091  13
   0   3  17 115.254 25.0899  19
   0   3  17 182.941 34.3861  32
   0   3  18 899.125 50.4905  12
   0   3  18 839.112 46.5705  19
   0   3  18 965.038 53.2152  32
   0   3 -18 895.311 48.4926   6
   0   3  18 812.520 50.6982  13
   0   3 -19 332.643 33.9235   6
   0   3  19 303.904 41.7716  32
   0   3  19 239.856 30.9394  19
   0   3  19 324.704 37.4976  12
   0   3  19 265.805 36.8189  13
   0   3  20 695.886 52.4030  32
   0   3  20 636.393 42.7135  19
   0   3  20 677.227 48.1278  13
   0   3 -20 738.992 45.9484   6
   0   3  20 707.853 49.0263  12
   0   3  21 205.092 32.8403  19
   0   3 -21 257.211 36.9971   6
   0   3  21 215.226 40.6702  12
   0   3 -21 277.056 46.2987   7
   0   3  21 251.838 39.5673  13
   0   3  21 238.998 43.8491  32
   0   3  22 354.260 37.5156  19
   0   3  22 451.331 44.8982  12
   0   3 -22 486.025 51.3825   7
   0   3 -22 434.787 41.2867   6
   0   3  22 474.818 49.2015  32
   0   3  22 409.011 43.7695  13
   0   3  23 1042.51 58.2047  19
   0   3  23 1157.06 63.9307  12
   0   3 -23 1172.57 68.3798   7
   0   3 -23 1210.45 59.9839   6
   0   3  23 1019.65 63.5936  13
   0   3 -24 388.827 49.4134   7
   0   3 -24 304.890 37.0925   6
   0   3  24 339.092 42.9385  13
   0   3  24 365.055 43.5820  12
   0   3 -25 185.094 33.9672   6
   0   3  25 193.189 40.7628  13
   0   3 -25 277.266 46.7579   7
   0   3  25 261.981 41.7077  12
   0   3 -26 96.6470 43.0973   7
   0   3  26 27.3098 39.9810  12
   0   3 -26 92.5703 30.6544   6
   0   3 -27 39.0340 26.8274   6
   0   3  27 24.5453 38.9306  12
   0   3 -27 47.4894 40.4800   7
   0   3  28 292.824 38.7670  12
   0   3 -28 263.168 39.1563   7
   0   3 -28 249.494 27.0526   6
   0   3  29 218.834 34.3977  12
   0   3 -29 210.232 34.6598   7
   0   3  30 158.718 29.8349  12
   0   3 -30 104.868 28.7776   7
   0   3 -31 100.334 23.8702   7
   0   3  31 93.7086 25.4604  12
   0   4   0 5031.42 219.657   2
   0   4   0 5229.63 213.699  22
   0   4   0 5416.88 226.713  25
   0   4  -1 1704.76 75.1825  22
   0   4  -1 1825.38 85.3304   2
   0   4   1 1806.29 95.1487  25
   0   4   1 1712.59 74.9535  22
   0   4  -1 1827.80 96.8402  25
   0   4   1 1720.16 84.1684   2
   0   4   2 6968.55 282.366  22
   0   4   2 6888.64 282.274  31
   0   4   2 7297.06 292.862  25
   0   4   2 6852.42 287.829   2
   0   4  -2 6718.79 287.949   2
   0   4  -2 6845.47 282.658  22
   0   4  -2 7223.10 294.194  25
   0   4  -3 641.851 67.4159  25
   0   4  -3 840.760 53.1165   2
   0   4   3 650.036 36.7983  31
   0   4  -3 659.665 37.4828  22
   0   4   3 687.918 36.0705  22
   0   4   3 685.636 64.2111  25
   0   4   3 760.666 49.6442   2
   0   4  -3 695.806 40.0415  20
   0   4   4 6705.18 269.970   2
   0   4   4 6568.35 273.306  25
   0   4   4 6562.40 263.802  31
   0   4  -4 6162.70 263.919  31
   0   4  -4 6670.60 271.042   2
   0   4  -4 6620.50 276.196  25
   0   4  -4 6062.48 264.238  22
   0   4   4 6688.47 263.689  22
   0   4  -4 6606.62 266.717  20
   0   4   5 796.393 40.0757  22
   0   4   5 729.309 55.0867   2
   0   4  -5 835.973 42.3979  31
   0   4  -5 805.583 57.0504   2
   0   4  -5 896.526 45.5784  20
   0   4   5 848.348 63.5242  25
   0   4  -5 845.450 70.2920  25
   0   4   5 764.758 41.5798  31
   0   4   6 3997.02 163.069  30
   0   4  -6 4012.76 167.391  20
   0   4  -6 3769.65 164.082  31
   0   4   6 3760.33 184.790  24
   0   4  -6 3874.47 172.603   2
   0   4   6 3678.23 173.313  25
   0   4   6 4044.80 163.687  31
   0   4   6 4394.90 172.434   2
   0   4  -7 7428.92 300.363   2
   0   4  -7 7128.94 292.957  31
   0   4   7 7096.77 292.141  34
   0   4   7 7284.35 292.578  31
   0   4   7 7030.25 292.249  30
   0   4   7 6762.75 307.437  24
   0   4  -7 7283.52 296.373  20
   0   4   7 7499.04 299.184   2
   0   4   7 7127.42 298.742  25
   0   4  -8 9611.89 391.517  31
   0   4  -8 9320.37 395.106  20
   0   4   8 9955.34 391.256  31
   0   4   8 9564.45 396.025  25
   0   4   8 9498.79 390.945  34
   0   4   8 9469.49 391.028  30
   0   4   8 8987.15 404.778  24
   0   4   8 10212.6 398.314   2
   0   4  -8 9344.00 403.160  25
   0   4  -9 728.259 69.1738  25
   0   4  -9 740.470 42.0874  31
   0   4   9 802.576 53.7073   2
   0   4   9 762.814 39.2826  34
   0   4   9 793.647 81.9367  24
   0   4   9 753.299 38.9588  30
   0   4  -9 689.850 45.9122  20
   0   4   9 779.347 40.5764  31
   0   4  10 116.748 24.8055  30
   0   4  10 104.447 24.3269  34
   0   4 -10 114.364 57.0241  25
   0   4  10 74.9724 73.1501  24
   0   4  11 3350.33 139.636  34
   0   4 -11 3269.60 139.368   6
   0   4  11 3167.48 139.864  12
   0   4 -11 3413.07 140.714   5
   0   4  11 3537.20 139.687  30
   0   4 -11 3295.56 154.952  25
   0   4  11 3240.11 161.773  24
   0   4  12 5139.31 200.557  34
   0   4  12 4427.71 200.315  13
   0   4  12 5369.00 200.516  30
   0   4 -12 4669.53 200.868   5
   0   4  12 4521.75 200.779  12
   0   4 -12 4925.58 200.179   6
   0   4 -13 3538.88 150.849   5
   0   4  13 3477.98 150.377  13
   0   4  13 3738.84 150.321  30
   0   4  13 3640.84 150.474  34
   0   4  13 3548.77 150.900  12
   0   4  14 1791.88 86.2399  13
   0   4  14 2046.59 86.7444  30
   0   4  14 1937.30 87.4642  12
   0   4  14 2041.95 86.9180  34
   0   4  15 510.156 36.9241  34
   0   4  15 442.890 35.5217  13
   0   4  15 496.555 39.1839  12
   0   4 -16 727.590 42.8579   6
   0   4  16 707.903 44.1769  34
   0   4  16 709.850 46.4751  12
   0   4  16 626.916 42.8915  13
   0   4  17 1027.27 57.1402  12
   0   4 -17 1037.24 54.4364   6
   0   4  17 995.423 54.7390  13
   0   4  18 1915.71 92.5219  13
   0   4 -18 2051.70 91.7492   6
   0   4  18 2174.90 94.5447  12
   0   4 -19 1006.10 54.6035   6
   0   4  19 876.196 55.1855  13
   0   4  19 977.840 57.3631  12
   0   4 -20 155.424 38.1534   6
   0   4  20 138.561 41.2298  12
   0   4  20 173.909 37.9107  13
   0   4  21 1184.19 66.6191  13
   0   4 -21 1266.36 66.0032   6
   0   4  21 1287.11 68.7263  12
   0   4  22 181.414 42.4857  12
   0   4 -22 153.742 39.2138   6
   0   4 -22 121.773 33.3288  22
   0   4  23 223.444 43.2682  12
   0   4 -23 306.124 39.2588   6
   0   4 -23 193.485 34.0042  22
   0   4 -24 10.9612 35.0655   6
   0   4  24 80.3652 40.9084  12
   0   4 -24 23.5236 35.3974  31
   0   4  25 860.522 53.8292  12
   0   4 -25 827.049 47.9839   6
   0   4  26 598.861 47.6400  12
   0   4 -26 674.691 50.5636   7
   0   4 -26 548.664 40.3823   6
   0   4 -26 530.592 40.9410  31
   0   4 -27 257.054 30.6778   6
   0   4  27 267.796 38.4630  12
   0   4 -27 268.559 42.1325   7
   0   4 -28 105.428 24.5367   6
   0   4 -28 128.009 35.9016   7
   0   4  28 129.905 33.7840  12
   0   4 -29 130.527 31.2634   7
   0   4 -29 85.1475 20.8601   6
   0   4  29 91.7879 30.1083  12
   0   4  30 24.5437 25.4776  12
   0   4 -30 45.3345 26.2852   7
   0   5   0-1.58693 24.5721  31
   0   5   0 7.98874 24.6284  22
   0   5   0 13.6291 38.7336   2
   0   5   0 79.6895 58.6776  25
   0   5  -1 207.489 27.3570  22
   0   5  -1 178.421 26.9317  31
   0   5   1 239.276 40.7100   2
   0   5   1 190.303 26.4639  31
   0   5  -1 136.268 39.7087   2
   0   5   1 157.361 59.9919  25
   0   5  -1 164.636 61.2286  25
   0   5   1 183.556 25.5681  22
   0   5  -2 7436.18 322.685  25
   0   5   2 7853.27 316.263   2
   0   5   2 7638.91 309.324  31
   0   5  -2 7542.99 309.544  31
   0   5   2 7396.10 320.694  25
   0   5  -2 7680.54 316.733   2
   0   5  -2 7647.36 309.966  22
   0   5   2 7393.95 309.500  22
   0   5  -3 4407.43 197.860  25
   0   5  -3 4382.35 182.806  22
   0   5   3 4343.57 195.112  25
   0   5  -3 4392.53 182.149  27
   0   5  -3 4527.27 190.336   2
   0   5   3 4452.32 189.500   2
   0   5   3 4338.42 182.001  22
   0   5  -3 4414.05 182.322  31
   0   5   3 4481.68 182.095  31
   0   5   4 561.890 47.2495   2
   0   5  -4 469.680 33.6281  31
   0   5  -4 507.506 65.0587  25
   0   5  -4 474.972 49.1225   2
   0   5  -4 458.543 33.7520  22
   0   5   4 448.227 31.4210  22
   0   5   4 482.440 60.0636  25
   0   5   4 512.408 33.1576  31
   0   5  -4 425.393 33.4208  27
   0   5   5 536.954 59.4985  25
   0   5  -5 586.904 52.4720   2
   0   5   5 622.935 37.2198  31
   0   5  -5 622.193 38.5366  31
   0   5  -5 638.991 37.6565  27
   0   5   5 625.748 35.8199  22
   0   5  -5 560.504 66.6821  25
   0   5   5 676.485 50.1946   2
   0   5  -5 640.703 38.8503  22
   0   5   6 7822.29 310.622   2
   0   5   6 7641.79 302.924  31
   0   5  -6 7167.07 316.086  25
   0   5   6 7338.45 302.279  30
   0   5  -6 7361.27 303.505   5
   0   5  -6 7472.52 303.159  31
   0   5  -6 7809.52 311.502   2
   0   5   6 7027.35 303.382  12
   0   5  -6 7359.07 302.957  27
   0   5  -7 1600.51 72.3636  31
   0   5   7 1575.79 69.8297  30
   0   5   7 1639.77 71.6490  31
   0   5  -7 1604.69 71.9253  27
   0   5  -7 1625.10 73.5024   5
   0   5   7 1495.28 71.6475  12
   0   5  -7 1642.47 84.7622   2
   0   5  -7 1575.55 70.8168   6
   0   5   7 1762.91 83.4412   2
   0   5  -8 2997.48 131.497   6
   0   5  -8 3259.82 143.292   2
   0   5  -8 3177.42 132.776  31
   0   5   8 2999.28 132.290  12
   0   5   8 3278.01 132.189  31
   0   5  -8 3119.89 133.303  22
   0   5  -8 3096.30 132.367  27
   0   5   8 3250.27 131.086  30
   0   5  -9 4724.68 195.635  31
   0   5   9 4950.09 195.028  31
   0   5  -9 4550.92 194.678   6
   0   5  -9 4683.59 196.025  22
   0   5   9 4847.04 194.387  30
   0   5   9 4729.33 194.351  34
   0   5   9 4572.34 195.402  12
   0   5  -9 4702.60 205.035   2
   0   5  -9 4615.86 195.228  27
   0   5 -10 3007.33 127.784   5
   0   5  10 3018.36 125.279  34
   0   5  10 3022.15 125.455  30
   0   5  10 2811.44 126.465  12
   0   5 -10 2828.96 127.369  22
   0   5  10 3211.29 126.314  31
   0   5 -10 2994.32 125.824   6
   0   5 -10 2874.91 127.247  31
   0   5  11 1634.43 66.6211  34
   0   5  11 1597.69 66.9856  30
   0   5 -11 1448.05 67.5102   6
   0   5  11 1418.38 68.0499  12
   0   5 -11 1478.57 70.5830   5
   0   5 -11 1463.08 69.7783  31
   0   5 -12 1360.70 69.3867  16
   0   5  12 1573.92 70.9219  34
   0   5 -12 1674.46 74.6515   5
   0   5  12 1602.82 72.7714  12
   0   5 -12 1575.45 71.7419   6
   0   5 -12 1557.19 73.4531  31
   0   5  12 1601.94 70.9048  30
   0   5 -13 272.997 32.6185   6
   0   5 -13 272.285 36.3024  31
   0   5  13 260.297 34.1959  12
   0   5  13 314.341 30.7832  34
   0   5  13 301.424 31.0755  30
   0   5 -13 272.957 27.7622  16
   0   5 -13 313.798 38.3859   5
   0   5 -14 302.206 40.2299  31
   0   5 -14 323.640 35.5744   6
   0   5  14 338.304 33.6748  34
   0   5  14 273.277 37.0580  12
   0   5 -14 372.312 40.3131   5
   0   5  14 357.728 34.5714  30
   0   5  15 7906.38 318.401  34
   0   5 -15 7824.95 318.288   6
   0   5  15 7729.13 319.697  12
   0   5 -15 7448.97 319.637  31
   0   5  16 2824.38 124.148  12
   0   5  16 2943.08 121.528  34
   0   5 -16 2654.55 122.800  31
   0   5 -16 2700.52 122.467  22
   0   5 -17 1194.18 65.8574  31
   0   5 -17 1247.73 65.5378  22
   0   5  17 1266.66 69.1347  12
   0   5  18 1250.43 69.6745  12
   0   5 -18 1239.37 66.1327  31
   0   5 -18 1287.74 66.0891  22
   0   5  19 41.6727 42.0924  12
   0   5 -19 67.9719 37.9067  31
   0   5 -19 124.994 36.9954  22
   0   5 -20 952.453 56.4792   6
   0   5  20 889.646 59.2161  12
   0   5 -20 896.940 55.5713  31
   0   5 -20 936.236 54.6813  22
   0   5 -21 664.925 48.8019   6
   0   5  21 571.349 50.9933  12
   0   5 -21 532.894 45.3246  31
   0   5 -21 588.973 44.2779  22
   0   5  22 202.356 43.4961  12
   0   5 -22 116.469 35.9818  31
   0   5 -22 276.869 50.6171   7
   0   5 -22 193.568 40.9442   6
   0   5 -22 140.111 34.5451  22
   0   5 -23 426.451 52.8180   7
   0   5  23 406.682 45.5055  12
   0   5 -23 351.114 37.7570  31
   0   5 -23 454.084 44.2459   6
   0   5 -23 364.456 35.8145  22
   0   5  24 402.085 45.8725  12
   0   5 -24 375.385 41.5093   6
   0   5 -24 437.974 51.6853   7
   0   5 -25 270.548 35.7150   6
   0   5  25 290.384 40.1065  12
   0   5  26 76.3862 35.7277  12
   0   5 -26 93.8996 29.4081   6
   0   5  27 0.56559 32.6801  12
   0   5 -27 30.6730 25.9732   6
   0   5  28 417.529 34.5094  12
   0   5 -28 410.259 28.8880   6
   0   5 -29 24.2733 18.0954   6
   0   5  29 13.5193 24.6838  12
   0   6   0 2384.30 97.9701  22
   0   6   0 2297.34 97.8250  31
   0   6   0 2086.50 106.732   2
   0   6   0 2145.95 98.6391   5
   0   6   0 2189.17 103.106  15
   0   6  -1 1975.97 91.0453  22
   0   6  -1 1983.34 90.6998  31
   0   6   1 2129.56 91.5305   5
   0   6   1 2076.74 90.3792  31
   0   6   1 2092.34 96.4004  15
   0   6   1 2083.20 90.9216  22
   0   6  -1 2179.62 92.1688   5
   0   6  -2 4015.94 164.224  22
   0   6   2 3908.31 167.445  15
   0   6  -2 3851.99 164.559   5
   0   6  -2 3915.26 163.555  31
   0   6   2 3786.34 163.824   5
   0   6   2 3953.35 163.675  22
   0   6   2 3975.93 163.384  31
   0   6   3 51.9715 29.6020   5
   0   6  -3 37.1281 29.9249  22
   0   6   3 56.7624 27.9137  31
   0   6   3 61.6189 26.6982  22
   0   6  -3 72.4281 22.9934   6
   0   6  -3 69.9149 29.1018  31
   0   6   3 38.8091 42.2070  15
   0   6  -3 51.1335 33.4781   5
   0   6  -4 954.804 50.0008   6
   0   6   4 1050.30 53.0336  31
   0   6   4 1060.56 51.8488  22
   0   6  -4 1080.76 54.6198  22
   0   6  -4 1030.42 52.9988  31
   0   6   4 1067.95 62.2528  15
   0   6  -4 1117.43 55.9385   5
   0   6  -5 1025.43 53.5488  31
   0   6   5 1061.00 53.0841  31
   0   6  -5 1048.02 63.9479  15
   0   6  -5 1084.09 56.0503   5
   0   6   5 973.772 62.7435  15
   0   6  -5 1025.93 50.8418   6
   0   6  -5 1103.70 55.0774  22
   0   6  -6 1658.13 76.1411   6
   0   6  -6 1678.67 77.5233  27
   0   6   6 1734.86 77.7491  31
   0   6   6 1717.42 85.3545  15
   0   6  -6 1720.99 78.0877  31
   0   6  -6 1791.30 80.1329   5
   0   6  -7 260.118 29.0778   6
   0   6  -7 243.832 32.3449  31
   0   6   7 230.837 47.1236  15
   0   6  -7 239.251 36.7090   5
   0   6  -7 212.587 31.6440  27
   0   6   7 244.735 31.9794  31
   0   6  -8 120.925 32.1146  31
   0   6   8 95.8269 23.6580  30
   0   6  -8 111.777 31.4407  27
   0   6  -8 104.447 36.0403   5
   0   6   8 107.336 31.5743  31
   0   6   8 86.8462 46.8097  15
   0   6  -8 134.277 28.8991   6
   0   6   9 215.712 32.6549  12
   0   6  -9 244.130 34.7703  31
   0   6   9 282.369 32.9782  31
   0   6   9 238.444 26.9670  30
   0   6  -9 258.125 31.0886   6
   0   6   9 254.259 49.4334  15
   0   6  -9 243.450 32.7063  27
   0   6 -10 16.4107 29.7825   6
   0   6  10 48.3370 31.8848  31
   0   6  10 29.6939 48.4428  15
   0   6  10 2.49013 31.5061  12
   0   6  10 30.4228 24.7464  30
   0   6 -10 20.6724 34.7923  22
   0   6 -10 30.9479 32.0769  27
   0   6 -10 14.3003 33.5975  31
   0   6  11 1591.03 76.0746  12
   0   6  11 1662.30 72.8755  30
   0   6 -11 1678.84 77.4823  22
   0   6 -11 1650.26 74.7130   6
   0   6 -11 1409.20 73.2244  16
   0   6 -11 1607.46 75.5945  27
   0   6 -11 1651.78 76.5559  31
   0   6  12 27.0511 27.8690  30
   0   6 -12 50.9539 32.2255   6
   0   6 -12 40.6536 35.8944  31
   0   6 -12 13.0075 36.7363  22
   0   6  12 24.8209 33.9537  12
   0   6 -12 55.1678 40.7994   5
   0   6 -12 41.8979 29.6458  16
   0   6 -12 28.4496 33.9760  27
   0   6 -13 842.650 53.0719  27
   0   6  13 816.544 53.5475  12
   0   6 -13 852.486 54.1231  31
   0   6 -13 857.195 54.8565  22
   0   6 -13 966.523 52.1213   6
   0   6  13 940.309 48.9363  30
   0   6 -13 1004.11 56.8774   5
   0   6 -13 842.326 47.9208  16
   0   6 -14 290.276 38.0254   6
   0   6 -14 268.947 30.2315  16
   0   6  14 216.686 32.1801  34
   0   6 -14 196.240 39.7974  22
   0   6 -14 231.098 40.7521  31
   0   6  14 228.122 40.2835  12
   0   6 -15 493.416 46.0039  22
   0   6 -15 518.660 45.9344  31
   0   6 -15 535.418 36.0771  16
   0   6 -15 567.820 44.6052   6
   0   6  15 502.157 47.4654  12
   0   6 -16 887.739 56.2392  22
   0   6  16 843.973 58.6992  12
   0   6 -16 852.517 54.0261  31
   0   6 -16 954.425 55.0585   6
   0   6 -17 218.474 40.4246  22
   0   6 -17 197.500 38.6377  31
   0   6 -17 262.978 41.1219   6
   0   6  17 217.494 46.6033  12
   0   6 -18 33.6167 39.8198   6
   0   6 -18-2.20471 36.8352  22
   0   6 -18-21.0641 35.4728  31
   0   6  18 0.87844 45.3006  12
   0   6  19 124.051 45.7599  12
   0   6 -19 115.250 34.8564  31
   0   6 -19 154.423 46.6257   7
   0   6 -19 183.158 37.3700  22
   0   6 -20 232.151 47.1539   7
   0   6 -20 149.155 35.9417  22
   0   6  20 100.659 44.2217  12
   0   6  20 201.646 54.9563  15
   0   6  21 293.356 44.8692  12
   0   6  21 326.417 55.2697  15
   0   6 -21 417.060 48.7803   7
   0   6 -21 252.390 36.7531  22
   0   6 -22 120.285 45.9728   7
   0   6 -22 70.6705 31.1376  22
   0   6  22 97.8506 40.9919  12
   0   6 -23 19.6361 43.6175   7
   0   6  23 74.8466 38.0891  12
   0   6 -23 70.6084 27.0258  22
   0   6 -23 88.7403 36.5282   6
   0   6 -24 208.786 42.0969   7
   0   6  24 166.573 37.1104  12
   0   6 -24 144.808 35.0544   6
   0   6  25 172.984 34.9786  12
   0   6 -25 235.829 38.6847   7
   0   6 -25 199.481 31.5070   6
   0   6  26 76.1409 30.5396  12
   0   6 -26 64.2693 26.2464   6
   0   6 -26 77.3249 33.3970   7
   0   6 -27 154.480 23.6589   6
   0   6 -27 139.715 30.3965   7
   0   7   0 19.2747 31.7603  22
   0   7   0-0.97119 31.5992  31
   0   7   0-11.8421 50.3753  15
   0   7   0 5.55937 35.6165   5
   0   7  -1 186.508 34.3350  22
   0   7  -1 209.152 33.7044  31
   0   7   1 214.760 33.2436  31
   0   7   1 192.570 50.1191  15
   0   7  -1 218.285 38.5769   5
   0   7   1 209.490 34.2195  22
   0   7  -1 244.790 52.0867  15
   0   7   1 187.794 36.8181   5
   0   7  -2 1033.63 58.7113  22
   0   7  -2 1122.27 60.7493   5
   0   7   2 1084.16 70.2568  15
   0   7  -2 1125.68 57.2571  31
   0   7   2 1171.48 57.1790  31
   0   7   2 1016.56 58.6161   5
   0   7   2 1080.03 56.9120  22
   0   7  -3 1760.09 82.5428   5
   0   7   3 1735.67 90.1108  15
   0   7  -3 1683.32 79.5207  31
   0   7  -3 1648.04 76.2885   6
   0   7   3 1752.40 79.3763  31
   0   7   3 1704.29 80.0195   5
   0   7   3 1794.16 79.2064  22
   0   7  -3 1699.31 80.7998  22
   0   7   4 4216.02 173.822  31
   0   7  -4 4306.85 175.004  22
   0   7  -4 4037.12 173.653  31
   0   7   4 4169.27 179.762  15
   0   7  -4 4342.79 175.375   5
   0   7  -4 3879.73 171.847   6
   0   7  -5 2049.05 93.6114  31
   0   7  -5 1997.22 90.7582   6
   0   7  -5 1989.33 95.0199  22
   0   7  -5 2091.03 96.1339   5
   0   7   5 2177.85 93.3128  31
   0   7   5 2139.41 102.781  15
   0   7  -6 72.6087 37.4956  22
   0   7  -6 79.2385 35.0492  31
   0   7  -6 80.0165 40.2973   5
   0   7   6 68.4042 34.3451  31
   0   7   6 33.1221 53.6262  15
   0   7  -6 78.4621 29.8676   6
   0   7  -7 152.868 34.8689  31
   0   7   7 152.442 34.8218  31
   0   7  -7 156.055 41.9963   5
   0   7  -7 113.203 30.6602   6
   0   7   7 168.141 54.3390  15
   0   7  -8 5.31194 42.3392   5
   0   7   8 80.9414 34.9271  31
   0   7  -8 18.1057 31.9502   6
   0   7  -8 17.4089 35.6374  31
   0   7   8 27.4369 55.7022  15
   0   7  -9 1618.11 82.8337   5
   0   7  -9 1638.48 77.3177   6
   0   7   9 1528.14 90.3962  15
   0   7   9 1730.68 78.2284  31
   0   7  -9 1645.07 78.9739  31
   0   7  10 350.208 60.6974  15
   0   7 -10 332.823 38.3601  16
   0   7 -10 379.345 48.9612   5
   0   7 -10 362.146 38.2449   6
   0   7 -10 300.257 40.5289  31
   0   7  11 385.474 60.8038  15
   0   7 -11 365.006 38.7208  16
   0   7 -11 422.717 42.0388  31
   0   7 -11 345.975 45.3190  22
   0   7 -11 376.363 40.0935   6
   0   7 -12 62.0215 33.6384  16
   0   7  12 90.3639 58.7689  15
   0   7 -12 129.959 41.5995  22
   0   7 -12 115.547 37.7374  31
   0   7 -12 114.529 37.2535   6
   0   7  13 2650.74 120.720  15
   0   7 -13 2567.81 111.491   6
   0   7 -13 2367.41 111.132  31
   0   7 -13 2579.74 113.565  22
   0   7 -13 2444.29 109.182  16
   0   7 -14 127.293 38.5644   6
   0   7  14 80.1552 59.5152  15
   0   7 -14 113.419 31.3990  16
   0   7 -14 77.6058 36.2999  31
   0   7 -14 77.6354 41.0977  22
   0   7 -15 558.099 46.3479   6
   0   7 -15 543.249 38.5447  16
   0   7 -15 487.721 46.9293  22
   0   7  15 641.095 64.0411  15
   0   7  16 314.592 60.8538  15
   0   7 -16 382.142 43.6228   6
   0   7 -16 421.866 42.9188  22
   0   7 -16 351.518 32.9800  16
   0   7 -17 961.632 58.2163   7
   0   7  17 828.973 70.9535  15
   0   7 -17 1019.39 56.1425   6
   0   7 -17 714.222 54.3692  22
   0   7 -18 30.6536 41.6973   7
   0   7 -18 40.9661 35.9353  22
   0   7 -18 1.74887 39.6213   6
   0   7  18 47.3117 55.2895  15
   0   7  19 150.372 54.2214  15
   0   7 -19 76.1059 34.6140  22
   0   7 -19 108.462 39.9574   6
   0   7 -19 137.251 42.7739   7
   0   7 -20 40.9126 38.5873   6
   0   7 -20 86.4130 41.8342   7
   0   7 -20 43.7717 31.4037  22
   0   7  20 65.1648 50.4366  15
   0   7 -21 143.269 37.1356   6
   0   7 -21 85.5054 29.9694  22
   0   7  21 109.336 47.4663  15
   0   7 -21 108.577 40.6956   7
   0   7 -22 846.080 50.6047   7
   0   7 -22 682.307 41.8868  22
   0   7 -23 55.3880 35.7513   7
   0   7 -24 688.626 43.7746   7
   0   7 -25 37.7926 28.5067   7
   0   7 -25 28.3295 24.5990   6
   0   7 -26 101.713 25.2208   7
   0   7 -26 79.2481 20.6697   6
   0   8   0 124.810 43.1961  22
   0   8   0 139.338 69.7539  15
   0   8   0 160.107 41.2810  31
   0   8   0 145.887 47.8988   5
   0   8   1 9183.51 376.608  15
   0   8  -1 8735.48 370.696  31
   0   8  -1 9092.35 372.043   5
   0   8   1 9140.08 370.732  31
   0   8  -1 8760.55 371.835  22
   0   8  -1 9318.17 376.794  15
   0   8   1 9166.49 371.643  22
   0   8   1 9039.96 371.440   5
   0   8  -2 7505.67 308.861  22
   0   8   2 6967.10 308.062   5
   0   8   2 7448.60 314.296  15
   0   8   2 7710.23 307.967  31
   0   8  -2 7426.10 309.399   5
   0   8  -2 7662.97 307.904  31
   0   8   3 1167.89 64.2072   5
   0   8  -3 1244.22 69.0318   5
   0   8  -3 1134.84 65.8576  22
   0   8   3 1098.49 63.0057  31
   0   8   3 1200.36 83.6443  15
   0   8  -3 1138.34 63.1649  31
   0   8   4 1945.54 88.0947  31
   0   8  -4 1962.58 92.2549   5
   0   8  -4 1783.90 84.4767   6
   0   8   4 1821.00 101.567  15
   0   8  -4 1846.08 89.9122  22
   0   8  -4 1955.90 88.1693  31
   0   8  -5 544.021 38.9636   6
   0   8   5 542.514 44.7044  31
   0   8   5 525.524 66.1765  15
   0   8  -5 579.152 52.7278   5
   0   8  -5 522.482 43.9442  31
   0   8  -5 489.313 48.0909  22
   0   8   6 179.831 63.3852  15
   0   8  -6 260.665 33.5778   6
   0   8  -6 324.643 49.0721   5
   0   8  -6 197.006 38.5592  31
   0   8   6 289.527 39.0689  31
   0   8  -6 182.712 43.8873  22
   0   8   7 659.993 45.7277  31
   0   8  -7 548.687 45.1725  31
   0   8  -7 570.498 42.6054   6
   0   8  -7 702.322 55.6954   5
   0   8  -7 611.785 50.7741  22
   0   8   7 545.289 68.2156  15
   0   8  -8 279.349 36.1905   6
   0   8  -8 367.539 50.4419   5
   0   8   8 252.103 63.7575  15
   0   8  -8 288.928 41.1565  16
   0   8  -8 247.920 39.3049  31
   0   8   8 343.666 39.5170  31
   0   8  -9 137.324 49.0272   5
   0   8   9 64.4452 61.9810  15
   0   8  -9 73.7936 34.1767   6
   0   8  -9 47.0085 37.2283  16
   0   8 -10 14.8605 35.4492   6
   0   8 -10 19.6335 36.5242  16
   0   8  10 11.7252 62.0602  15
   0   8 -10 58.3638 47.7300   5
   0   8 -11 1404.05 72.7197  16
   0   8 -11 1351.15 75.6760  22
   0   8  11 1513.40 89.1141  15
   0   8 -11 1676.11 81.2484   5
   0   8 -11 1519.87 72.5875   6
   0   8 -12 492.906 47.3296  22
   0   8  12 517.539 66.2026  15
   0   8 -12 552.181 43.6210   6
   0   8 -12 547.293 41.9390  16
   0   8 -13 136.153 37.6484   6
   0   8 -13 123.925 34.0050  16
   0   8 -13 86.3285 39.1672  22
   0   8  13 105.991 60.3513  15
   0   8 -13 136.198 35.6172   7
   0   8 -14 993.570 57.2284  22
   0   8  14 890.855 72.6613  15
   0   8 -14 956.513 55.7532   6
   0   8 -14 902.290 51.2330  16
   0   8 -14 1011.92 55.0573   7
   0   8 -15 1379.31 70.9098   6
   0   8 -15 1511.05 70.5350   7
   0   8  15 1369.30 83.6347  15
   0   8 -15 1385.68 70.6158  22
   0   8 -15 1364.30 66.3583  16
   0   8 -16 278.465 30.0299  16
   0   8 -16 439.630 40.1132   6
   0   8  16 325.464 59.3088  15
   0   8 -16 327.044 39.4662   7
   0   8 -16 293.401 38.6471  22
   0   8  17 432.233 57.2218  15
   0   8 -17 415.488 41.4540   6
   0   8 -17 375.371 40.7687   7
   0   8 -17 409.371 38.3842  22
   0   8  18 43.6320 50.5327  15
   0   8 -18 37.6834 30.8472  22
   0   8 -18 87.8927 34.7801   7
   0   8 -18 45.7878 36.0937   6
   0   8  19 127.986 47.5041  15
   0   8 -19 155.427 29.6189  22
   0   8 -19 82.3410 33.7495   7
   0   8 -19 112.877 35.0642   6
   0   8 -20 111.561 31.6955   6
   0   8 -20 89.5933 32.5279   7
   0   8  20 58.5513 43.2978  15
   0   8 -20 56.9926 26.6953  22
   0   8 -21 54.7404 29.5522   7
   0   8 -21 1.24313 29.9177   6
   0   8 -21 26.6184 22.4623  22
   0   8 -22 56.4265 26.4781   6
   0   8 -22 42.3344 27.0737   7
   0   8 -23 22.3001 23.4526   6
   0   8 -23-2.99129 24.2874   7
   0   9   0 2.29309 41.7539   5
   0   9   0-17.7310 65.4012  15
   0   9   0-20.6891 35.7922  31
   0   9   1 157.460 66.9423  15
   0   9   1 111.814 42.2076   5
   0   9  -1 71.5611 35.7800  31
   0   9  -1 149.916 43.9403   5
   0   9   1 97.4700 36.2338  31
   0   9   2 1389.65 90.8855  15
   0   9   2 1509.69 72.4225   5
   0   9  -2 1484.09 75.2136   5
   0   9  -2 1446.68 73.2511  22
   0   9   2 1393.41 70.1209  31
   0   9  -2 1284.46 69.7868  31
   0   9   3 94.7440 65.4858  15
   0   9   3 29.6289 38.5643   5
   0   9  -3 102.172 46.0113   5
   0   9  -3 48.5574 39.6033  22
   0   9   3 67.0577 35.4574  31
   0   9  -4 752.840 52.7507  22
   0   9   4 749.124 49.1001  31
   0   9  -4 853.680 57.7255   5
   0   9   4 656.715 73.4671  15
   0   9  -5 200.251 41.7846  22
   0   9   5 231.799 65.8376  15
   0   9  -5 262.476 48.6611   5
   0   9   5 233.309 36.7837  31
   0   9  -6 820.516 56.8467  16
   0   9   6 872.804 75.5033  15
   0   9  -6 840.993 48.3900   6
   0   9  -6 827.245 56.3187  22
   0   9   7 891.426 74.6852  15
   0   9  -7 848.686 55.5914  22
   0   9  -7 732.999 54.8422  16
   0   9  -7 877.326 48.5835   6
   0   9  -8 670.139 49.2288  16
   0   9   8 648.617 69.2060  15
   0   9  -8 692.983 49.7803  22
   0   9  -8 583.679 42.3927   6
   0   9  -9 119.504 32.2410   6
   0   9  -9 138.454 37.9737  16
   0   9   9 134.342 61.7260  15
   0   9 -10 1188.75 63.7842  16
   0   9  10 1315.76 80.9934  15
   0   9 -10 1233.57 61.4439   6
   0   9 -11 426.951 37.6042   6
   0   9  11 477.105 63.8752  15
   0   9 -11 413.176 39.4690  16
   0   9 -12 688.972 49.7577  22
   0   9 -12 817.453 47.5305   6
   0   9 -12 852.515 47.6728  16
   0   9  12 859.716 67.8685  15
   0   9  13 314.146 56.7315  15
   0   9 -13 296.255 32.6024  16
   0   9 -13 267.269 34.8607   6
   0   9 -13 261.461 36.2975  22
   0   9 -14 518.894 35.7482  16
   0   9 -14 514.295 39.5228  22
   0   9  14 536.391 57.0504  15
   0   9 -14 508.029 38.5671   6
   0   9 -15 76.2974 30.6196  22
   0   9  15 109.117 50.2408  15
   0   9 -15 96.8584 24.7797  16
   0   9 -15 37.1393 31.1743   6
   0   9 -16-36.6504 28.3138  22
   0   9 -16 22.7507 28.9140   6
   0   9  16 26.6645 46.6487  15
   0   9 -17 557.169 37.9887  22
   0   9 -17 659.168 39.7719   6
   0   9  17 617.765 51.2774  15
   0   9 -18 16.3164 24.2791  22
   0   9 -18 75.3760 27.6297   6
   0   9  18 34.5738 39.9044  15
   0   9 -19 12.0352 21.6368  22
   0   9 -19 23.3130 24.6492   6
   0   9 -20 38.1918 22.2089   6
   0  10   0 3033.44 132.972  16
   0  10  -1 3666.82 157.224  16
   0  10   1 3643.44 156.604  16
   0  10   2 638.460 49.2454  16
   0  10  -2 647.201 49.3208  16
   0  10  -3 578.077 48.0043  16
   0  10   3 610.623 46.0760  16
   0  10   4 1026.14 72.9864  15
   0  10   4 847.113 53.2170  16
   0  10   5 264.934 60.8658  15
   0  10   5 220.361 37.9846  16
   0  10  -6 1098.70 56.4496  16
   0  10   6 1156.64 73.8290  15
   0  10  -7 71.9503 34.1987  16
   0  10   7 42.7258 56.6274  15
   0  10   7 57.0826 32.2192  16
   0  10  -8 183.086 34.5102  16
   0  10   8 134.412 31.9345  16
   0  10   8 139.765 54.4213  15
   0  10   9 385.203 34.2351  16
   0  10  -9 352.679 35.3410  16
   0  10   9 364.994 55.4437  15
   0  10 -10 131.773 25.5264   6
   0  10 -10 155.710 29.5257  16
   0  10  10 192.754 51.9408  15
   0  10  10 133.052 27.6978  16
   0  10  11 203.172 49.1058  15
   0  10 -11 157.845 25.1841   6
   0  10 -11 198.793 27.9207  16
   0  10  12 42.4357 45.5884  15
   0  10 -12 59.1419 24.9529  16
   0  10 -12 48.9145 23.8746   6
   0  10 -13 190.925 23.8916  16
   0  10  13 233.027 43.6909  15
   0  10 -13 173.786 25.0467   6
   0  10  14 257.785 42.1082  15
   0  10 -14 237.711 24.8912   6
   0  10 -14 215.451 22.3198  16
   0  10  15 41.4332 37.4110  15
   0  10 -15 2.79991 21.2496   6
   0  10 -16 184.707 21.2250   6
   0  11   0 18.6324 28.9282  16
   0  11   1 63.6116 28.8480  16
   0  11  -1 51.9222 28.6946  16
   0  11   2 176.186 29.9636  16
   0  11  -2 197.198 30.4670  16
   0  11  -3 24.4958 29.1112  16
   0  11   3 1.21803 28.2208  16
   0  11   4 304.682 30.6343  16
   0  11   5 180.513 28.2136  16
   0  11   6 52.5877 24.8517  16
   0  11  -6 94.8946 26.1754  16
   0  11  -7 150.696 25.5246  16
   0  11   7 132.471 25.0070  16
   0  11   8 26.6153 22.0320  16
   0  11  -8 50.2369 23.0699  16
   0  11  -9 245.617 23.8129  16
   0  11 -10 41.2999 18.9910  16
   0  11 -11 10.8241 17.0888  16
  -1 -11  11 185.158 18.0364   8
  -1 -11  11 163.304 18.2627  35
  -1 -11  10 37.9124 17.3257  35
  -1 -11  10 13.0075 17.0507   8
  -1 -11   9-26.2963 14.7066   9
  -1 -11   9 7.24753 17.4560   8
  -1 -11   9-5.67279 18.3744  35
  -1 -11   8 186.985 17.8721   9
  -1 -11   8 231.208 20.8436   8
  -1 -11   7 73.2537 16.1555   9
  -1 -11   7 93.8135 19.3477   8
  -1 -11   6 157.710 21.8993  35
  -1 -11   6 126.155 17.3099   9
  -1 -11   5 67.3700 21.6382  35
  -1 -11   4 27.9826 20.9522  35
  -1 -11   3 245.624 24.4121  35
  -1 -11   2 127.976 22.3720  35
   1 -11  -2 121.929 19.7526  35
   1 -11  -1 39.3087 19.3944  35
  -1 -11   1 26.5251 20.7043  35
   1 -11   0-5.24738 20.1372  35
  -1 -11   0 22.2083 20.6221  35
   1 -11   1 86.9373 21.0656  35
  -1 -11  -1 44.9141 20.5674  35
   1 -11   2 169.926 19.5082   8
   1 -11   2 213.601 23.2921  35
  -1 -11  -2 217.374 22.3348  35
   1 -11   3 851.566 44.5418  35
   1 -11   3 950.896 42.3907   8
   1 -11   4 232.117 20.6355   8
   1 -11   4 181.892 23.2912  35
   1 -11   5 137.970 19.1624   8
   1 -11   5 136.647 21.6575  35
   1 -11   6 235.736 20.9081   8
   1 -11   6 230.734 23.2952  35
   1 -11   7 47.4824 17.5742   8
   1 -11   7 23.0823 19.8850  35
   1 -11   8 644.307 32.6891   8
   1 -11   9 0.50472 16.5551   8
   1 -11  10 36.7201 16.0187   8
   1 -11  10 36.4262 17.0297  35
  -1 -10  17 51.3906 16.1075   9
  -1 -10  16 41.5518 18.0052   9
  -1 -10  16 41.1724 18.2151  35
  -1 -10  15-4.94644 19.1697  35
  -1 -10  15-5.52902 18.7594   9
  -1 -10  14 207.366 22.4914   9
  -1 -10  13 63.4411 23.5948   8
  -1 -10  13 7.73294 21.1635   9
  -1 -10  12 89.9428 22.7361   9
  -1 -10  12 102.407 24.9575   8
  -1 -10  11 134.067 26.2433   8
  -1 -10  11 128.010 23.9927   9
  -1 -10  10 82.7383 24.5440   9
  -1 -10   9 402.182 30.9528   9
  -1 -10   8 465.999 33.2268   9
  -1 -10   7 521.358 34.8758   9
  -1 -10   6 131.134 26.8479   9
  -1 -10   5 387.994 31.9235   9
   1 -10  -5 398.041 29.1905  35
  -1 -10   4 72.2199 30.0541  35
  -1 -10   4 103.912 26.8825   9
   1 -10  -4 88.6205 24.2540  35
   1 -10  -3 345.458 29.9396  35
  -1 -10   3 335.317 32.9929  35
  -1 -10   3 370.627 31.4562   9
  -1 -10   2 42.7324 27.1087   9
  -1 -10   2 47.3489 30.1143  35
   1 -10  -2 15.3312 26.6233  35
  -1 -10   1 1048.93 52.7491   9
  -1 -10   1 1072.56 55.0060  35
   1 -10  -1 1064.37 53.5838  35
  -1 -10   0 175.550 28.4960   9
   1 -10   0 176.127 30.2375  35
  -1 -10   0 136.577 30.9678  35
   1 -10   1 251.590 32.4966  35
  -1 -10  -1 223.619 30.5121  35
  -1 -10  -1 283.152 29.3935   9
  -1 -10  -2 787.849 41.6390   9
  -1 -10  -2 698.477 42.5449  35
  -1 -10  -3 804.729 43.2740   9
  -1 -10  -3 849.442 44.2405  35
   1 -10   3 791.775 42.0639   9
   1 -10   4 515.475 33.7489   9
  -1 -10  -4 576.057 35.2433  35
  -1 -10  -4 588.347 34.9575   9
  -1 -10  -5 404.531 29.7132  35
  -1 -10  -5 404.520 29.5196   9
   1 -10   6 1208.35 54.8906   9
  -1 -10  -6 1139.70 54.8310   9
   1 -10   7 67.8930 23.1262   9
   1 -10   8 179.345 23.7713   9
   1 -10   8 198.859 27.1216   8
   1 -10   9 55.8194 25.2635   8
   1 -10   9 52.8113 21.9867   9
   1 -10  10 259.243 24.4969   9
   1 -10  10 309.887 28.3151   8
   1 -10  11 19.6510 23.7513   8
   1 -10  11 19.8243 20.2896   9
   1 -10  12 245.424 26.1713   8
   1 -10  12 235.574 22.3490   9
   1 -10  13 1.81313 22.2460   8
   1 -10  13 8.85549 18.4862   9
   1 -10  14 66.7493 18.2142   9
   1 -10  14 88.3927 21.5244   8
   1 -10  15 134.492 21.7077   8
   1 -10  15 153.733 17.9020   9
   1 -10  16 34.2748 19.1761   8
   1 -10  16 24.5423 14.6007   9
  -1  -9  21 7.23295 17.0209   9
  -1  -9  21-4.48670 17.4621   8
  -1  -9  21-0.19756 13.4854  19
  -1  -9  20-3.34705 20.1193   9
  -1  -9  20 21.3316 20.2670   8
  -1  -9  19 258.489 25.1995   9
  -1  -9  19 243.607 25.8553   8
  -1  -9  19 258.916 29.2064  23
  -1  -9  18 36.5756 23.7114   9
  -1  -9  18 24.7922 29.3160  23
  -1  -9  18 0.78600 24.2539   8
  -1  -9  17 286.623 33.8738  23
  -1  -9  17 306.689 29.4050   8
  -1  -9  17 341.290 29.1123   9
  -1  -9  16 330.920 35.6762  23
  -1  -9  16 364.964 30.7627   9
  -1  -9  16 372.945 32.0830   8
  -1  -9  15 169.335 33.4537  23
  -1  -9  15 172.265 28.4168   9
  -1  -9  14 47.7407 28.6678   9
  -1  -9  14 12.8551 33.0928  23
  -1  -9  13 14.2600 28.9086   9
  -1  -9  13 58.6911 34.1830  23
  -1  -9  12 356.839 38.7781  23
  -1  -9  12 384.137 34.3175   9
  -1  -9  11 346.648 31.3382  10
  -1  -9  11 311.984 37.9252  23
  -1  -9  11 324.125 34.5143   9
  -1  -9  10 309.918 38.5440  23
  -1  -9  10 326.346 32.3206  10
  -1  -9   9 697.809 42.9233   9
  -1  -9   9 575.427 39.3990  10
  -1  -9   9 699.284 45.5153  23
  -1  -9   8 207.668 35.6164  23
  -1  -9   8 233.226 32.9778   9
  -1  -9   7 136.389 31.8504   9
   1  -9  -7 116.948 25.3331  35
   1  -9  -6 396.456 31.3062  35
  -1  -9   6 391.888 36.3013   9
   1  -9  -5 956.004 48.7497  35
  -1  -9   5 900.703 51.0709   9
   1  -9  -4 119.243 27.3595   9
  -1  -9   4 129.798 31.8297   9
   1  -9  -4 150.387 29.2810  35
  -1  -9   3 245.650 34.1012   9
   1  -9  -3 221.384 29.4811   9
   1  -9  -3 210.741 31.6032  35
  -1  -9   2 695.447 44.9102   9
   1  -9  -2 717.276 41.9192   9
  -1  -9   1 678.965 44.0230   9
   1  -9  -1 678.748 40.9775   9
   1  -9   0 733.812 43.5449   9
  -1  -9   0 807.112 46.1039   9
   1  -9   1 870.619 47.6191   9
  -1  -9  -1 946.923 50.7571  35
  -1  -9  -1 845.511 49.7859   9
  -1  -9  -2 663.996 41.5282  35
  -1  -9  -2 628.883 41.1343   9
  -1  -9  -3 250.926 33.7073   9
  -1  -9  -3 300.518 32.9156  35
   1  -9   3 264.052 31.4310   9
  -1  -9  -4 1971.04 85.9760  35
  -1  -9  -4 1829.15 85.9062   9
   1  -9   4 1936.25 85.6716   9
  -1  -9  -5 1112.10 53.7516  35
  -1  -9  -5 1022.56 55.1039   9
   1  -9   5 997.227 53.8926   9
  -1  -9  -6 2624.87 108.094  35
   1  -9   6 2536.60 108.885   9
  -1  -9  -6 2353.79 108.936   9
  -1  -9  -7 522.817 38.4775   9
   1  -9   7 532.558 38.6873   9
  -1  -9  -7 566.712 36.2186  35
  -1  -9  -8 1002.86 53.6169   9
   1  -9   8 1100.14 53.8050   9
  -1  -9  -9 405.643 33.3443   9
   1  -9   9 408.528 34.7322   9
   1  -9  10-25.1792 28.9921   9
  -1  -9 -10 68.1918 27.4395   9
   1  -9  11 169.361 29.2367   9
  -1  -9 -11 198.705 27.8050   9
   1  -9  11 226.481 31.9615   8
   1  -9  12 491.230 39.0614  23
  -1  -9 -12 432.637 33.1348   9
   1  -9  12 514.868 37.7167   8
   1  -9  12 493.621 35.2410   9
   1  -9  13-5.53911 29.4387   8
   1  -9  13-11.6223 26.6053   9
   1  -9  13 11.1663 32.2344  23
   1  -9  14 750.600 41.2765   9
   1  -9  14 703.697 45.5585  23
   1  -9  15 85.4481 31.7357  23
   1  -9  15 141.170 25.8046   9
   1  -9  16 61.9709 31.3967  23
   1  -9  16 84.0062 24.6587   9
   1  -9  17 74.9029 23.2440   9
   1  -9  17 94.7790 28.3325  23
   1  -9  18 382.544 27.2597   9
   1  -9  18 348.039 30.0188  23
   1  -9  19 199.355 23.2693   8
   1  -9  19 197.171 21.1264   9
   1  -9  20 36.2581 16.7023   9
   1  -9  20 30.8336 18.2593   8
  -1  -8  24 177.342 19.7738   9
  -1  -8  24 188.315 18.3914   8
  -1  -8  24 211.490 18.5366  19
  -1  -8  23 80.7684 19.4444   8
  -1  -8  23 91.4508 26.4627  23
  -1  -8  23 70.5027 19.3134  19
  -1  -8  23 72.0765 21.3247   9
  -1  -8  22 23.0133 21.7124   8
  -1  -8  22 5.47744 23.9010   9
  -1  -8  22 0.95409 29.4555  23
  -1  -8  21 501.776 34.3421   9
  -1  -8  21 437.767 41.2147  23
  -1  -8  21 538.075 34.2369   8
  -1  -8  20 4.49483 26.7909   8
  -1  -8  20 1.24346 27.7946   9
  -1  -8  20-20.1689 36.1917  23
  -1  -8  19 257.998 30.7864   9
  -1  -8  19 244.927 30.7791   8
  -1  -8  19 195.619 39.9263  23
  -1  -8  18 56.0080 30.2723   8
  -1  -8  18 68.6420 29.8988   9
  -1  -8  18-5.22400 39.1088  23
  -1  -8  17 118.811 31.3660   9
  -1  -8  17 93.6519 40.1701  23
  -1  -8  17 133.773 31.3817   8
  -1  -8  16 35.8796 40.7066  23
  -1  -8  16 23.7299 31.5021   9
  -1  -8  16-40.5836 32.4095   8
  -1  -8  15 242.366 35.3148   8
  -1  -8  15 266.197 34.5938   9
  -1  -8  15 226.480 43.0838  23
  -1  -8  14 272.266 45.1212  23
  -1  -8  14 376.795 36.5714   9
  -1  -8  14 333.299 35.8783  10
  -1  -8  13 42.6901 41.6586  23
  -1  -8  13 58.5669 33.0451   9
  -1  -8  13 8.73430 31.5216  10
  -1  -8  12 218.877 34.1372  10
  -1  -8  12 195.075 43.9110  23
  -1  -8  12 278.175 35.9347   9
  -1  -8  11 379.916 37.6188   9
  -1  -8  11 277.183 35.7244  10
  -1  -8  11 333.275 45.5888  23
  -1  -8  10 1202.84 67.3645  23
  -1  -8  10 1206.15 61.2623  10
  -1  -8  10 1264.22 62.2644   9
  -1  -8   9 85.7895 31.9318  10
  -1  -8   9 191.411 42.0617  23
  -1  -8   9 162.790 33.7491   9
  -1  -8   8 329.272 36.4103   9
   1  -8  -8 348.403 29.1928  35
  -1  -8   8 358.285 42.5685  23
  -1  -8   8 355.965 34.6169  10
   1  -8  -7 259.110 28.2425  35
  -1  -8   7 204.550 32.3007  10
  -1  -8   7 240.340 34.9094   9
  -1  -8   7 256.934 40.9044  23
  -1  -8   6 334.672 36.7621   9
  -1  -8   6 337.766 40.8826  23
   1  -8  -6 361.988 31.4438  35
  -1  -8   6 320.489 33.8706  10
   1  -8  -6 344.723 32.1389   9
   1  -8  -5 921.724 49.9839  35
  -1  -8   5 1012.36 52.9554   9
   1  -8  -5 948.698 50.2592   9
  -1  -8   5 1024.02 55.9474  23
  -1  -8   5 933.507 51.1636  10
  -1  -8   4 224.847 32.2094  10
  -1  -8   4 207.159 36.9091  23
  -1  -8   4 222.287 34.5822   9
   1  -8  -4 200.093 30.4691   9
   1  -8  -3 2003.85 91.0811   9
  -1  -8   3 2231.74 93.5095  23
  -1  -8   3 2088.48 92.5280   9
  -1  -8   3 1939.79 90.9155  10
  -1  -8   2 2869.94 126.369   9
   1  -8  -2 2968.87 125.266   9
  -1  -8   1 7447.99 301.907   9
   1  -8  -1 7220.05 301.308   9
   1  -8   0 3411.51 145.864   9
  -1  -8   0 3479.54 146.563   9
  -1  -8  -1 1086.07 58.0848   9
   1  -8   1 1123.65 57.3118   9
   1  -8   2 1883.11 83.8153   9
  -1  -8  -2 1814.60 84.3296   9
  -1  -8  -3 1326.44 68.4613   9
   1  -8   3 1492.45 67.6782   9
  -1  -8  -4 145.090 30.6903  35
   1  -8   4 146.867 31.1057   9
  -1  -8  -5 540.362 37.1662  35
   1  -8   5 449.471 37.4422   9
   1  -8   6 1247.70 64.9790  23
  -1  -8  -6 1255.09 60.6441  35
   1  -8   6 1278.86 62.1634   9
  -1  -8  -7 826.052 43.8515  35
   1  -8   7 763.197 50.8801  23
   1  -8   7 741.982 46.1773   9
   1  -8   8 179.881 33.1555   9
   1  -8   8 141.769 38.8415  23
  -1  -8  -8 217.823 27.9580  35
   1  -8   9 493.056 46.2025  23
  -1  -8  -9 557.344 35.2152  35
   1  -8   9 523.845 39.4440   9
   1  -8  10 924.400 56.8603  23
   1  -8  10 890.526 48.9380  10
   1  -8  10 923.942 50.7544   9
   1  -8  11 171.106 32.2191   9
   1  -8  11 136.497 30.3135  10
   1  -8  11 135.991 41.7071  23
   1  -8  12 295.873 34.0340   9
   1  -8  12 219.099 42.7806  23
   1  -8  13 134.175 41.4153  23
   1  -8  13 162.653 31.8052   9
   1  -8  14 33.8441 30.4832   9
   1  -8  14 29.4665 41.3972  23
   1  -8  15 55.5646 30.7427   9
   1  -8  15 74.8219 40.8884  23
   1  -8  16 325.012 44.0190  23
   1  -8  16 347.874 34.5548   9
   1  -8  16 384.599 36.4041   8
   1  -8  17 253.576 31.6390   9
   1  -8  17 282.719 33.8765   8
   1  -8  17 283.404 42.3984  23
   1  -8  18 66.2746 28.7813   9
   1  -8  18 72.9909 30.2614   8
   1  -8  18 94.2570 39.2607  23
   1  -8  19 414.079 33.9416   8
   1  -8  19 449.391 33.1962   9
   1  -8  20 78.2707 33.6785  23
   1  -8  20 110.884 26.4190   9
   1  -8  20 143.158 27.5408   8
   1  -8  21 81.7839 20.6163  19
   1  -8  21 81.7761 24.2810   8
   1  -8  21 108.694 29.6629  23
   1  -8  21 106.264 19.0715   4
   1  -8  21 75.5226 23.9365   9
   1  -8  22 90.6677 18.5748  19
   1  -8  22 112.713 21.1592   8
   1  -8  22 106.938 21.3722   9
   1  -8  22 75.0249 26.5437  23
   1  -8  23 103.796 15.8214  19
   1  -8  23 110.375 18.7193   8
  -1  -7  26 57.6486 18.6315  19
  -1  -7  26 26.1438 15.9745   8
  -1  -7  25 49.4110 19.1275   8
  -1  -7  25 25.0718 21.8799  19
  -1  -7  24 91.6513 33.7220  23
  -1  -7  24 87.7676 22.4366   8
  -1  -7  23 221.822 39.8973  23
  -1  -7  23 301.011 28.6898   8
  -1  -7  22 136.747 28.6064   8
  -1  -7  22 71.0401 41.9027  23
  -1  -7  21 621.813 55.4279  23
  -1  -7  21 788.292 44.3905   8
  -1  -7  20 296.101 34.1866   8
  -1  -7  20 354.996 37.0265   9
  -1  -7  20 298.726 47.5688  23
  -1  -7  19 519.672 53.0982  23
  -1  -7  19 582.370 42.4599   9
  -1  -7  19 547.595 39.9009   8
  -1  -7  18 264.248 50.0640  23
  -1  -7  18 216.814 33.7111   8
  -1  -7  18 155.113 34.6758   9
  -1  -7  17 321.216 35.8182   8
  -1  -7  17 235.592 50.9831  23
  -1  -7  17 316.079 36.8889   9
  -1  -7  16 1167.38 71.6422  23
  -1  -7  16 1152.55 60.5849   8
  -1  -7  16 1240.44 61.4797   9
  -1  -7  15 32.6663 48.7853  23
  -1  -7  15-22.3103 33.9212  10
  -1  -7  15 8.78397 33.0123   9
  -1  -7  14 190.039 35.7251  10
  -1  -7  14 155.221 48.4761  23
  -1  -7  14 239.464 34.9565   9
  -1  -7  13 581.708 42.4116  10
  -1  -7  13 547.712 42.0678   9
  -1  -7  13 522.129 53.7650  23
  -1  -7  12 326.628 36.5318   9
  -1  -7  12 273.374 46.7733  23
  -1  -7  12 332.674 35.8154  10
  -1  -7  11 79.2357 44.1686  23
  -1  -7  11 27.2313 32.0193   9
  -1  -7  11 72.9511 32.6438  10
  -1  -7  10 1062.79 56.6977  10
  -1  -7  10 1085.85 55.8358   9
  -1  -7  10 1088.96 63.8610  23
  -1  -7   9 840.932 47.9444   9
  -1  -7   9 800.474 47.4811  10
   1  -7  -9 827.245 42.1535  35
  -1  -7   9 832.650 55.7553  23
   1  -7  -8 1899.69 82.3895  35
  -1  -7   8 1916.66 85.3345   9
  -1  -7   8 1871.82 89.7280  23
  -1  -7   8 1904.25 85.1037  10
   1  -7  -7 700.556 37.6927  35
  -1  -7   7 659.983 42.0246   9
  -1  -7   7 622.161 41.4630  10
  -1  -7   7 725.497 49.5112  23
  -1  -7   6 231.588 37.9059  23
  -1  -7   6 175.274 29.5885  10
  -1  -7   6 151.136 30.0705   9
  -1  -7   5 259.611 31.2319   9
  -1  -7   5 237.361 36.3050  23
  -1  -7   5 190.482 29.8061  10
  -1  -7   4 937.488 49.1870   9
  -1  -7   4 1017.47 52.2767  23
  -1  -7   4 839.755 48.0156  10
  -1  -7   3 378.997 33.4690  10
  -1  -7   3 484.134 37.9778  23
  -1  -7   3 435.182 34.9607   9
   1  -7  -2 1286.17 61.4935   9
  -1  -7   2 1359.55 63.1991   9
  -1  -7   2 1228.77 61.8942  10
  -1  -7   1 785.278 47.3534  10
  -1  -7   1 900.443 48.9305   9
   1  -7  -1 958.153 47.3784   9
  -1  -7   0 263.210 29.7784  10
   1  -7   0 351.382 29.7184   9
  -1  -7   0 305.798 30.9409   9
  -1  -7  -1 592.770 37.7690  10
   1  -7   1 691.462 38.3666   9
   1  -7   2 18.8114 25.9688   9
   1  -7   3 2149.31 93.4852  23
   1  -7   3 2075.28 92.3270   9
   1  -7   4 3456.68 144.285  23
   1  -7   4 3351.34 142.838   9
  -1  -7  -5 2064.92 92.1142  35
   1  -7   5 2140.60 92.7523   9
   1  -7   5 2161.56 95.1532  23
  -1  -7  -6 175.361 25.9181  35
   1  -7   6 187.429 36.1933  23
   1  -7   6 201.490 29.3189   9
  -1  -7  -7 17.7576 24.6844  35
   1  -7   7-16.9046 36.6610  23
   1  -7   7 16.2298 28.0600   9
   1  -7   7 15.9296 26.3627  10
   1  -7   8 399.261 32.7601  10
   1  -7   8 373.825 33.8908   9
  -1  -7  -8 409.064 30.1648  35
   1  -7   8 366.142 42.9756  23
   1  -7   9 395.943 44.8885  23
   1  -7   9 393.206 34.5111   9
  -1  -7  -9 426.702 30.2805  35
   1  -7   9 312.362 33.4107  10
   1  -7  10 3289.91 138.009  23
   1  -7  10 3075.10 133.457   9
   1  -7  10 3111.22 133.258  10
   1  -7  11 206.611 32.6539   9
   1  -7  11 179.566 31.9143  10
   1  -7  11 157.142 45.4180  23
   1  -7  12 96.2994 32.2156  10
   1  -7  12 198.842 33.0398   9
   1  -7  12 149.800 46.3601  23
   1  -7  13 443.134 38.1600  10
   1  -7  13 466.668 38.5458   9
   1  -7  13 399.448 51.3650  23
   1  -7  14 668.674 43.6647   9
   1  -7  14 647.049 55.9920  23
   1  -7  14 630.871 43.6771   8
   1  -7  15 525.691 39.1114   9
   1  -7  15 435.423 39.4649   8
   1  -7  15 394.527 51.9369  23
   1  -7  16 1977.40 88.4474   8
   1  -7  16 1943.96 88.0978   9
   1  -7  16 1813.96 95.7470  23
   1  -7  17 1223.39 75.9778  23
   1  -7  17 1360.75 66.1200   9
   1  -7  17 1345.69 66.2577   8
   1  -7  18 26.5566 32.5512   8
   1  -7  18 12.8579 32.0344   9
   1  -7  18 36.4704 47.7546  23
   1  -7  19 468.879 38.0201   9
   1  -7  19 469.133 38.9585   8
   1  -7  20 31.0230 31.7757   8
   1  -7  20-7.32476 31.2750   9
   1  -7  20 39.5329 44.7173  23
   1  -7  21 390.790 46.3994  23
   1  -7  21 448.257 36.1729   8
   1  -7  21 448.151 36.2991   9
   1  -7  22 43.2700 21.9791   4
   1  -7  22 72.4615 28.5807   9
   1  -7  22 15.7515 26.8741   8
   1  -7  22 18.3350 38.1212  23
   1  -7  23 213.796 25.9043  19
   1  -7  23 213.820 26.2277   8
   1  -7  23 261.823 21.6526   4
   1  -7  23 168.197 35.9333  23
   1  -7  23 240.807 27.9979   9
   1  -7  24 29.9277 21.2339  19
   1  -7  24 69.6811 21.3547   8
   1  -7  24 63.9415 22.8830   9
   1  -7  24 81.4982 30.0786  23
   1  -7  25 85.2462 18.7081  19
   1  -7  25 81.9362 18.3345   8
   1  -7  25 62.9712 26.1917  23
  -1  -6  28 54.4869 24.4482  23
  -1  -6  28 89.4725 19.6168  19
  -1  -6  27 323.256 26.3027  19
  -1  -6  27 257.195 31.9944  23
  -1  -6  26 104.728 20.4279   8
  -1  -6  26 80.0014 33.9707  23
  -1  -6  26 91.0136 25.5689  19
  -1  -6  25 116.430 39.5258  23
  -1  -6  25 81.4832 23.4853   8
  -1  -6  24 145.928 26.6257   8
  -1  -6  23 608.457 39.6488   8
  -1  -6  22 212.408 32.6311   8
  -1  -6  22 146.680 24.7744   4
  -1  -6  21 568.369 40.5740   8
  -1  -6  20 341.024 35.3069   8
  -1  -6  19 163.005 32.8713   8
  -1  -6  18 364.229 35.7005   8
  -1  -6  18 385.955 56.5846  23
  -1  -6  17 1698.27 89.6448  23
  -1  -6  17 1635.51 76.7434   8
  -1  -6  16 2684.70 113.746  10
  -1  -6  16 2389.84 121.149  23
  -1  -6  15 1459.81 71.6054  10
  -1  -6  15 1515.51 70.3305   9
  -1  -6  15 1391.60 81.2414  23
  -1  -6  14 523.570 54.3718  23
  -1  -6  14 494.894 40.2803  10
  -1  -6  14 494.324 38.3821   9
  -1  -6  13 256.596 34.1219  10
  -1  -6  13 290.459 32.9226   9
  -1  -6  13 288.645 48.3008  23
  -1  -6  12 2788.46 124.263  23
  -1  -6  12 2741.08 118.799  10
  -1  -6  12 2770.71 118.317   9
  -1  -6  11 465.237 35.7592  10
  -1  -6  11 441.440 34.6522   9
  -1  -6  11 434.623 48.3478  23
  -1  -6  10 81.0181 27.6092  10
  -1  -6  10 52.7899 27.3980   9
  -1  -6  10 29.8030 39.2955  23
  -1  -6   9 805.601 44.7178   9
   1  -6  -9 843.918 40.3149  35
  -1  -6   9 840.602 52.8696  23
  -1  -6   9 852.169 45.8405  10
   1  -6  -8 1546.61 66.2669  35
  -1  -6   8 1495.71 69.0515  10
  -1  -6   8 1476.23 68.9077   9
  -1  -6   8 1559.11 73.7828  23
  -1  -6   7 1555.74 70.4301  10
  -1  -6   7 1591.86 70.5090   9
  -1  -6   7 1510.83 74.8852  23
  -1  -6   6 177.247 34.1406  23
  -1  -6   6 185.897 27.0098  10
  -1  -6   6 156.926 26.1903   9
  -1  -6   5 857.676 46.7274  23
  -1  -6   5 774.106 41.7366  10
  -1  -6   5 739.302 41.8730   9
  -1  -6   4 1029.06 51.5556  23
  -1  -6   4 910.110 47.6593   9
  -1  -6   4 960.209 47.5423  10
  -1  -6   3 1884.21 85.7732  10
  -1  -6   3 1933.74 86.4071   9
   1  -6  -2 2299.54 109.086   1
  -1  -6   2 2251.25 100.919   9
  -1  -6   2 2542.64 102.229  23
  -1  -6   1 1041.02 50.5334  23
   1  -6  -1 872.543 60.4443   1
  -1  -6   0 775.891 52.9232   1
  -1  -6   0 786.448 41.6267  23
   1  -6   0 722.214 39.3702   9
   1  -6   0 746.683 54.6077   1
   1  -6   1 1764.04 76.6160  23
  -1  -6  -1 1600.06 85.6365   1
   1  -6   1 1582.56 75.6296   9
   1  -6   2 47.9957 26.8109  23
  -1  -6  -2 95.9680 34.5692   1
   1  -6   2 87.8551 22.6557   9
   1  -6   3 813.851 42.2067   9
   1  -6   3 849.306 45.4286  23
   1  -6   4 407.999 34.4670  23
   1  -6   4 399.816 29.1321   9
   1  -6   5 215.076 32.7772  23
  -1  -6  -5 198.499 26.2663  10
   1  -6   5 194.563 25.4917   9
   1  -6   5 187.773 25.0048  10
  -1  -6  -6 391.313 27.4049  35
   1  -6   6 376.092 28.4646  10
  -1  -6  -6 337.177 29.7757  10
   1  -6   6 356.614 29.0557   9
   1  -6   6 393.638 37.2684  23
   1  -6   7 1756.41 80.0610   9
  -1  -6  -7 1647.26 80.1656  10
   1  -6   7 1806.32 79.7109  10
  -1  -6  -7 1940.83 78.9093  35
   1  -6   7 1986.19 84.6847  23
  -1  -6  -8 2573.80 102.498  35
   1  -6   8 2312.06 103.576  10
   1  -6   8 2440.13 107.876  23
   1  -6   8 2343.92 103.694   9
  -1  -6  -9 262.115 24.0741  35
   1  -6   9 253.294 28.4820   9
   1  -6   9 262.491 40.5025  23
   1  -6   9 208.543 28.2107  10
  -1  -6 -10 716.023 35.5933  35
   1  -6  10 649.701 49.5167  23
   1  -6  10 656.846 39.4151  10
   1  -6  10 564.303 38.8168   9
   1  -6  11 188.573 43.0967  23
   1  -6  11 170.818 28.4225   9
   1  -6  11 207.507 30.0736  10
   1  -6  12 116.504 44.3757  23
   1  -6  12 118.526 29.9901  10
   1  -6  12 121.666 28.7697   9
   1  -6  13 166.507 30.5981   9
   1  -6  13 146.392 45.5922  23
   1  -6  13 139.903 31.9011  10
   1  -6  14 992.345 52.7586  10
   1  -6  14 913.971 64.6529  23
   1  -6  14 939.788 51.5549   9
   1  -6  15 124.968 50.3367  23
   1  -6  15 131.678 31.5934   8
   1  -6  15 158.105 32.1785   9
   1  -6  16 377.692 35.9555   9
   1  -6  16 384.976 52.9016  23
   1  -6  16 381.889 36.8494   8
   1  -6  17 646.519 61.1135  23
   1  -6  17 661.670 44.1032   8
   1  -6  17 648.515 44.0465   9
   1  -6  18 480.574 40.0234   8
   1  -6  18 490.711 58.3412  23
   1  -6  18 535.890 40.7428   9
   1  -6  19 737.524 47.0389   9
   1  -6  19 757.773 46.4310   8
   1  -6  19 657.818 63.6606  23
   1  -6  20 163.691 54.2293  23
   1  -6  20 199.612 34.3960   8
   1  -6  20 178.509 35.3859   9
   1  -6  21 45.4811 33.9793   9
   1  -6  21 65.3508 32.4163   8
   1  -6  21 54.6604 51.8599  23
   1  -6  22 581.949 35.5094   4
   1  -6  22 497.781 41.4774   9
   1  -6  22 571.633 39.5075   8
   1  -6  23 72.2693 23.0070   4
   1  -6  23 96.5198 28.1304   8
   1  -6  23 59.8210 30.7428   9
   1  -6  24 84.7480 27.9563  19
   1  -6  24 50.3085 21.0014   4
   1  -6  24 100.319 25.6086   8
   1  -6  25 99.1108 23.0743   8
   1  -6  25 87.3190 25.6572  19
   1  -6  26 53.5031 22.8182  19
   1  -6  27 610.501 33.1962  19
  -1  -5  29 88.2689 27.3680  23
  -1  -5  28 30.9579 31.8998  23
  -1  -5  27 253.955 27.2719  33
  -1  -5  27 290.822 39.9124  23
  -1  -5  26 233.954 43.7486  23
  -1  -5  26 169.335 29.2136  33
  -1  -5  26 241.496 31.9689   9
  -1  -5  26 278.777 25.5923   8
  -1  -5  25 308.498 49.0713  23
  -1  -5  25 409.557 35.6660   9
  -1  -5  25 283.939 34.5956  33
  -1  -5  25 332.805 29.5947   8
  -1  -5  24 286.886 37.9781   9
  -1  -5  24 301.276 53.5362  23
  -1  -5  24 282.858 36.6438  33
  -1  -5  24 334.173 31.6290   8
  -1  -5  23 1046.40 72.2958  23
  -1  -5  23 1184.45 55.5390   8
  -1  -5  23 1137.27 59.5634   9
  -1  -5  22 1134.26 59.4273   9
  -1  -5  22 1072.47 56.4791   8
  -1  -5  22 1162.66 52.6072   4
  -1  -5  22 1130.78 74.6609  23
  -1  -5  21 332.993 37.9668   9
  -1  -5  21 249.719 33.7727   8
  -1  -5  21 225.982 36.7635  33
  -1  -5  21 225.932 59.1228  23
  -1  -5  20 244.814 31.8359   8
  -1  -5  20 219.984 58.2923  23
  -1  -5  20 136.021 35.4229  33
  -1  -5  19 398.591 39.2466  33
  -1  -5  19 433.195 35.4181   8
  -1  -5  18 498.383 40.7878  33
  -1  -5  18 538.345 37.7205   8
  -1  -5  17 1522.52 68.7912   8
  -1  -5  17 1411.23 71.0090  33
  -1  -5  16 311.934 33.7960  33
  -1  -5  16 282.657 30.8620   8
  -1  -5  16 341.555 36.3854  10
  -1  -5  15 761.678 45.8798  33
  -1  -5  15 868.619 47.6340  10
  -1  -5  14 1457.87 68.3089  33
  -1  -5  14 1344.98 78.0628  23
  -1  -5  14 1585.03 69.5696  10
  -1  -5  13 933.102 49.0056  33
  -1  -5  13 1042.86 50.9526  10
  -1  -5  13 967.146 60.4865  23
  -1  -5  12 622.614 37.5859   9
  -1  -5  12 705.182 49.8265  23
  -1  -5  12 580.334 38.5590  10
  -1  -5  11 4155.50 174.505   9
  -1  -5  11 4466.78 178.579  23
  -1  -5  11 4128.57 174.778  10
  -1  -5  10 2019.18 87.5829   9
  -1  -5  10 2028.70 87.9147  10
  -1  -5  10 2007.53 92.6084  23
   1  -5  -9 7467.05 333.438  20
  -1  -5   9 7810.27 326.178  10
  -1  -5   9 8084.43 326.230   9
   1  -5  -9 8323.62 338.820  24
  -1  -5   9 8244.11 328.306  23
  -1  -5   8 2225.20 97.3815  23
   1  -5  -8 2202.41 91.3492  35
   1  -5  -8 2068.80 100.267  20
   1  -5  -8 2399.62 115.195  24
   1  -5  -8 2071.21 106.539   2
  -1  -5   8 2151.57 93.2382   9
   1  -5  -7 1339.41 85.4491  24
   1  -5  -7 1092.31 71.3636   2
  -1  -5   7 1200.09 97.5853  24
  -1  -5   7 1149.41 54.4047   9
   1  -5  -7 1115.92 61.1365  20
  -1  -5   7 1244.08 59.7879  23
  -1  -5   6 1066.44 62.6034  21
   1  -5  -6 947.224 54.0288  20
  -1  -5   6 890.451 81.7112  25
  -1  -5   6 1028.89 91.4509  24
  -1  -5   6 1095.67 53.3970  23
   1  -5  -6 1038.53 64.6965   2
   1  -5  -6 999.892 81.0687  24
  -1  -5   6 1059.58 66.8449   1
   1  -5  -6 972.184 50.5529   1
   1  -5  -5 4278.93 190.746   2
  -1  -5   5 4619.62 203.609  24
   1  -5  -5 4138.01 183.803   1
   1  -5  -5 4525.66 198.310  24
  -1  -5   5 4573.61 182.333  23
  -1  -5   5 4249.26 191.977   1
  -1  -5   5 4538.00 200.372  25
  -1  -5   5 4614.13 191.439  21
   1  -5  -5 4228.93 184.727  20
  -1  -5   4 467.023 45.6970  21
   1  -5  -4 414.175 31.8184  20
  -1  -5   4 448.277 78.1917  24
  -1  -5   4 412.180 33.6425  23
   1  -5  -4 315.117 47.1352   2
   1  -5  -4 342.564 35.8046   1
  -1  -5   4 395.551 48.4345   1
   1  -5  -4 353.272 71.1112  24
  -1  -5   3 2336.40 121.388  24
   1  -5  -3 2053.49 92.3460  20
  -1  -5   3 2248.38 103.560  21
  -1  -5   3 2138.89 102.843   1
   1  -5  -3 1976.63 96.4857   1
   1  -5  -3 2275.88 118.225  24
  -1  -5   3 1954.89 93.8198  20
  -1  -5   3 2199.58 91.7907  23
  -1  -5   2 498.284 33.6950  23
   1  -5  -2 400.730 76.8685  24
   1  -5  -2 427.495 41.6294   1
  -1  -5   2 395.617 46.7752  21
  -1  -5   2 503.252 76.5047  24
   1  -5  -2 423.594 62.9208  25
  -1  -5   2 462.356 48.0149   1
  -1  -5   2 472.932 34.6139  20
   1  -5  -2 434.774 30.5107  20
  -1  -5   2 505.157 68.9828  25
   1  -5  -1 1283.44 64.3690  20
  -1  -5   1 1521.68 100.351  24
  -1  -5   1 1578.08 76.9901   1
   1  -5  -1 1360.76 90.9564  25
   1  -5  -1 1521.60 75.8681   1
  -1  -5   1 1569.51 65.4758  23
  -1  -5   1 1417.49 68.7436  20
   1  -5   0 170.438 39.3419   1
   1  -5   0 101.564 61.2747  25
  -1  -5   0 174.362 38.5931   1
  -1  -5   0 88.8920 72.5528  24
   1  -5   0 97.6579 17.8038  20
  -1  -5   0 96.4862 24.6245  23
  -1  -5   0 114.114 28.1018  20
  -1  -5  -1 2498.13 112.281   1
  -1  -5  -1 2586.07 104.153  23
  -1  -5  -1 2265.54 108.630  20
   1  -5   1 2507.97 114.829   1
   1  -5   1 2319.88 126.279  25
   1  -5   1 2409.12 104.281  23
   1  -5   1 2544.52 114.743  21
   1  -5   2 4314.72 190.531  21
   1  -5   2 4341.02 199.685  25
   1  -5   2 4395.09 203.872  24
   1  -5   2 4299.90 181.949  23
  -1  -5  -2 4655.20 181.464  23
  -1  -5  -2 4540.80 187.461   1
  -1  -5  -2 4082.26 186.085  20
   1  -5   2 4238.49 190.762   1
  -1  -5  -3 5244.65 236.438   2
  -1  -5  -3 5261.07 231.270  20
   1  -5   3 5600.39 226.850  23
   1  -5   3 5543.00 243.747  25
   1  -5   3 5749.49 247.767  24
  -1  -5  -3 5410.52 230.767   1
  -1  -5  -3 5751.15 243.143  24
   1  -5   3 5511.56 236.190   1
   1  -5   3 5721.15 235.308  21
   1  -5   4 2294.81 106.088  21
   1  -5   4 2246.12 97.1469  23
  -1  -5  -4 2135.04 108.934   2
  -1  -5  -4 2281.59 119.917  24
   1  -5   4 2280.81 128.849  24
   1  -5   4 2351.47 109.126   1
  -1  -5  -4 2246.32 100.179   1
  -1  -5  -4 2192.20 101.736  20
   1  -5   5 4695.57 208.917  21
   1  -5   5 4751.43 212.785   1
   1  -5   5 5177.15 226.302  24
  -1  -5  -5 4792.03 204.056   1
  -1  -5  -5 5043.95 217.587  24
  -1  -5  -5 4782.36 211.915   2
   1  -5   5 5110.66 202.105  23
  -1  -5  -5 4622.44 207.089  20
  -1  -5  -6 1036.08 67.3507   2
   1  -5   6 1003.87 52.6505  23
  -1  -5  -6 942.922 80.1593  24
  -1  -5  -6 1031.90 50.0869   1
  -1  -5  -6 920.345 56.5525  20
   1  -5   6 980.878 66.7952   1
   1  -5   6 861.768 93.8020  24
   1  -5   6 981.437 59.4102  21
   1  -5   7 1610.87 72.3395  23
  -1  -5  -7 1534.94 86.3106   2
  -1  -5  -7 1537.70 65.9537  35
   1  -5   7 1526.47 78.5605  21
  -1  -5  -7 1291.35 76.3940  20
  -1  -5  -7 1578.25 94.4843  24
  -1  -5  -8 2092.53 105.307  20
   1  -5   8 2345.04 99.9893  23
   1  -5   8 2096.54 95.6771   9
  -1  -5  -8 2377.18 94.7105  35
   1  -5   9 2082.22 85.6293   9
  -1  -5  -9 1741.23 96.9884  20
   1  -5   9 1736.17 85.1202  10
   1  -5   9 2130.15 90.5471  23
  -1  -5  -9 2064.02 83.8921  35
   1  -5  10 2092.01 98.8769  23
   1  -5  10 1969.22 93.3996   9
   1  -5  10 2109.69 93.8663  10
   1  -5  11 762.095 42.0611  10
   1  -5  11 757.541 41.2513   9
   1  -5  11 753.832 51.2036  23
   1  -5  12 1577.34 73.3373   9
   1  -5  12 1702.06 74.3365  10
   1  -5  12 1704.81 81.5908  23
   1  -5  13 1015.50 51.4918   9
   1  -5  13 1070.24 52.6453  10
   1  -5  13 1010.37 62.7862  23
   1  -5  14 250.976 31.5904  10
   1  -5  14 177.961 45.4395  23
   1  -5  14 183.530 29.4353   9
   1  -5  15 112.375 31.3529   9
   1  -5  15 107.078 49.8235  23
   1  -5  15 137.650 28.7504   8
   1  -5  16 4767.54 197.181   8
   1  -5  16 4814.80 197.266   9
   1  -5  16 4509.27 203.426  23
   1  -5  17 1005.38 53.8595   9
   1  -5  17 969.780 52.7267   8
   1  -5  18 28.5853 30.9291   8
   1  -5  18 82.9132 33.0688   9
   1  -5  19 192.646 33.5935   8
   1  -5  20 204.437 34.5160   8
   1  -5  21 303.571 38.4130  33
   1  -5  21 371.411 36.4894   8
   1  -5  22 1525.94 63.3190   4
   1  -5  22 1419.44 65.3524   8
   1  -5  23 34.3501 28.9893   8
   1  -5  23 22.6706 31.2289  33
   1  -5  23 62.7816 51.5756  23
   1  -5  23 44.3574 25.1124   4
   1  -5  24 272.762 34.4390  19
   1  -5  24 198.696 32.0661  33
   1  -5  24 245.160 51.0485  23
   1  -5  24 322.098 27.0074   4
   1  -5  24 300.369 30.5344   8
   1  -5  25 238.475 31.9324  19
   1  -5  25 163.874 44.9082  23
   1  -5  25 147.253 28.8468  33
   1  -5  25 218.189 23.3050   4
   1  -5  25 189.614 27.0723   8
   1  -5  26-0.65449 38.5140  23
   1  -5  26 61.2413 27.4635  19
   1  -5  26-2.98418 24.4059  33
   1  -5  27 11.9510 25.1009  19
   1  -5  27 30.4058 34.5520  23
   1  -5  28 29.8990 29.1299  23
   1  -5  28 57.3295 21.9590  19
   1  -5  29 318.384 23.3504  19
   1  -5  29 257.468 27.5503  23
  -1  -4  30 56.8204 28.1111  23
  -1  -4  30 64.0718 22.5295  19
  -1  -4  30 64.0837 21.8606  33
  -1  -4  29 334.655 36.9140  23
  -1  -4  29 366.699 30.4076  19
  -1  -4  29 298.145 30.2108  33
  -1  -4  28 227.387 32.0684  33
  -1  -4  28 266.977 31.0496  19
  -1  -4  28 229.254 40.2002  23
  -1  -4  27 420.749 35.5177  19
  -1  -4  27 365.008 29.8135  13
  -1  -4  27 414.828 47.1222  23
  -1  -4  27 313.626 37.1442  33
  -1  -4  26 81.5568 47.7775  23
  -1  -4  26 77.3023 35.8653  33
  -1  -4  26 91.3976 24.0509   8
  -1  -4  26 66.7355 26.6525  13
  -1  -4  25 820.219 45.9887  13
  -1  -4  25 853.767 49.2639   9
  -1  -4  25 832.492 43.9527   8
  -1  -4  25 675.620 52.7792  33
  -1  -4  25 837.143 64.6817  23
  -1  -4  24 227.729 55.9346  23
  -1  -4  24 222.592 29.3050   8
  -1  -4  24 247.315 32.3282  13
  -1  -4  24 208.995 40.8504  33
  -1  -4  24 298.851 37.2604   9
  -1  -4  23 1505.40 74.0901  13
  -1  -4  23 1759.50 76.5282   9
  -1  -4  23 1524.14 89.1940  23
  -1  -4  23 1555.95 72.8860   8
  -1  -4  22 2422.38 105.577   8
  -1  -4  22 2411.53 106.126  13
  -1  -4  22 2514.60 107.690   9
  -1  -4  22 2439.15 109.087  11
  -1  -4  22 2224.09 118.417  23
  -1  -4  21 546.118 63.9873  23
  -1  -4  21 613.572 36.8886   4
  -1  -4  21 590.692 40.0573  13
  -1  -4  21 601.472 40.5084   8
  -1  -4  21 529.876 43.5761   9
  -1  -4  21 575.229 44.5306  11
  -1  -4  20 1339.80 64.4518   9
  -1  -4  20 1220.89 62.4988   8
  -1  -4  20 1331.28 63.1362  13
  -1  -4  20 1389.76 66.0679  11
  -1  -4  19 555.538 59.7456  23
  -1  -4  19 602.346 38.3013   8
  -1  -4  19 610.749 42.0580  11
  -1  -4  19 594.429 40.6976   9
  -1  -4  19 587.258 38.0161  13
  -1  -4  18 1772.57 81.4587  11
  -1  -4  18 1827.13 79.3602  13
  -1  -4  18 1858.31 80.4234   9
  -1  -4  18 1691.02 78.9979   8
  -1  -4  18 1703.11 91.4029  23
  -1  -4  17 112.441 46.8020  23
  -1  -4  17 109.958 25.4669   8
  -1  -4  17 114.108 28.3243  11
  -1  -4  17 127.561 27.4754   9
  -1  -4  17 119.196 25.3634  13
  -1  -4  16 222.987 31.5557  10
  -1  -4  16 240.315 28.3125   9
  -1  -4  16 273.800 29.2859  11
  -1  -4  16 267.489 45.5396  23
  -1  -4  16 260.166 25.2620  13
  -1  -4  16 211.799 25.8400   8
  -1  -4  15 239.879 25.0829  13
  -1  -4  15 244.134 27.7666  11
  -1  -4  15 348.357 44.9946  23
  -1  -4  15 293.766 30.8093  10
  -1  -4  15 301.849 38.1848  14
  -1  -4  14 252.783 26.1764  11
  -1  -4  14 253.428 29.5235  10
  -1  -4  14 306.131 35.3894  14
  -1  -4  13 2927.82 125.942  10
  -1  -4  13 3080.05 128.961  14
  -1  -4  12 3107.49 137.776  10
  -1  -4  12 3544.35 140.444  14
   1  -4 -12 3390.26 148.270  24
  -1  -4  12 3348.59 162.614  24
  -1  -4  11 1977.20 116.132  25
  -1  -4  11 2257.47 123.175  24
   1  -4 -11 2268.13 106.446  24
   1  -4 -11 2385.25 109.638   2
   1  -4 -11 2083.69 101.693  21
  -1  -4  11 2131.91 92.9026  10
  -1  -4  10 3426.28 156.774   1
   1  -4 -10 3468.95 155.999  24
  -1  -4  10 3441.01 164.513  25
   1  -4 -10 3497.00 156.317   2
   1  -4 -10 3518.89 151.617  21
  -1  -4  10 3409.01 168.446  24
  -1  -4  10 3493.62 147.471  23
  -1  -4   9 4108.75 182.054   1
   1  -4  -9 4294.78 183.027  24
  -1  -4   9 4211.09 188.923  25
  -1  -4   9 4101.21 173.005  23
   1  -4  -9 4232.31 176.965  21
   1  -4  -9 3984.24 180.775   2
  -1  -4   9 3933.82 192.401  24
  -1  -4   8 424.310 66.8240  25
  -1  -4   8 396.673 36.1464  23
   1  -4  -8 410.289 62.2970  24
  -1  -4   8 282.795 49.0469   1
   1  -4  -8 335.863 48.7079   2
  -1  -4   8 423.634 80.5356  24
  -1  -4   7 1197.28 85.5746  25
   1  -4  -7 1027.43 67.6916   2
  -1  -4   7 1385.87 94.6977  24
  -1  -4   7 1221.99 70.3463   1
   1  -4  -7 1047.27 49.6088   1
  -1  -4   7 1181.41 57.0532  23
   1  -4  -7 1198.93 80.9070  24
   1  -4  -6 287.289 66.2744  24
   1  -4  -6 269.823 33.5732  20
  -1  -4   6 247.487 68.0686  25
  -1  -4   6 274.510 78.3206  24
   1  -4  -6 228.076 44.6327   2
  -1  -4   6 270.329 32.3681  23
   1  -4  -6 221.423 25.3846   1
  -1  -4   5 369.409 33.3061  23
  -1  -4   5 311.388 67.2325  25
   1  -4  -5 364.264 68.8388  24
  -1  -4   5 429.975 79.2191  24
   1  -4  -5 331.191 47.5663   2
   1  -4  -5 353.328 34.3308  20
   1  -4  -5 385.462 32.6052   1
  -1  -4   4 851.381 58.5102   1
   1  -4  -4 817.909 46.6004   1
   1  -4  -4 721.371 56.8938   2
  -1  -4   4 933.057 85.5482  24
   1  -4  -4 811.259 45.4546  20
  -1  -4   4 819.354 43.8684  23
  -1  -4   4 764.430 75.7791  25
   1  -4  -4 835.578 77.3800  24
  -1  -4   4 785.526 46.3234  20
   1  -4  -3 3323.85 148.308   1
   1  -4  -3 3516.39 146.719  20
  -1  -4   3 3643.46 147.904  20
  -1  -4   3 3449.25 152.815   1
   1  -4  -3 3225.44 157.118  25
   1  -4  -3 3572.20 164.199  24
   1  -4  -3 3445.00 151.808   2
  -1  -4   3 3628.69 166.397  24
   1  -4  -2 478.463 32.2842  20
  -1  -4   2 457.401 74.1952  24
  -1  -4   2 474.674 34.8285  20
   1  -4  -2 463.652 62.6334  25
   1  -4  -2 414.660 47.2660   2
  -1  -4   2 431.531 46.5491   1
   1  -4  -2 475.126 74.0405  24
   1  -4  -2 438.769 41.4666   1
   1  -4  -1 419.791 42.8623   1
  -1  -4   1 427.771 34.3419  20
  -1  -4   1 414.914 65.4758  25
   1  -4  -1 312.839 61.8625  25
  -1  -4   1 360.114 73.3844  24
   1  -4  -1 413.658 29.5992  20
  -1  -4   1 486.165 44.0529   1
  -1  -4   0 510.580 36.9266  20
  -1  -4   0 426.184 43.7824   1
   1  -4   0 486.617 29.7298  20
  -1  -4   0 516.238 73.8324  24
   1  -4   0 512.340 45.2490   1
   1  -4   0 510.393 66.8457  25
   1  -4   1 2075.08 115.730  24
   1  -4   1 1901.83 108.040  25
  -1  -4  -1 1941.20 92.0331   1
   1  -4   1 1947.79 94.7496   1
  -1  -4  -1 2190.26 90.3040  20
   1  -4   1 1941.19 85.3095  20
  -1  -4  -2 349.582 34.9059  20
   1  -4   2 416.232 77.8859  24
   1  -4   2 399.033 42.8324  21
  -1  -4  -2 383.921 37.0922   1
  -1  -4  -2 263.248 47.5455   2
  -1  -4  -3 6571.36 275.114   1
  -1  -4  -3 6547.11 276.426  20
   1  -4   3 6794.19 288.810  24
   1  -4   3 6868.68 278.145  21
  -1  -4  -3 6604.65 279.899   2
  -1  -4  -4 5997.73 250.948   2
   1  -4   4 5873.04 248.843  21
  -1  -4  -4 5884.76 245.283   1
   1  -4   4 5919.77 260.439  24
   1  -4   4 6042.00 257.765  25
  -1  -4  -4 5978.28 247.949  20
  -1  -4  -4 5900.68 255.496  24
   1  -4   5 516.908 43.7426  21
   1  -4   5 445.253 71.1097  25
   1  -4   5 529.316 36.8894  23
  -1  -4  -5 543.598 42.7772  20
  -1  -4  -5 529.116 69.8420  24
  -1  -4  -5 616.639 36.1940   1
   1  -4   5 453.419 82.4443  24
  -1  -4  -5 466.656 52.4900   2
   1  -4   6 2822.04 124.587  21
  -1  -4  -6 2837.92 118.742   1
  -1  -4  -6 2767.61 124.826  20
  -1  -4  -6 2688.87 128.379   2
   1  -4   6 2895.61 140.711  25
   1  -4   6 2917.86 119.140  23
  -1  -4  -6 2813.73 135.158  24
   1  -4   6 2816.44 145.220  24
  -1  -4  -6 2750.52 115.922  35
   1  -4   7 2358.71 130.052  24
  -1  -4  -7 2213.15 112.364   2
  -1  -4  -7 2210.68 108.129  20
   1  -4   7 2489.64 125.055  25
  -1  -4  -7 2296.21 117.107  24
  -1  -4  -7 2358.11 99.3215   1
   1  -4   7 2483.20 106.824  21
   1  -4   7 2352.93 101.369  23
  -1  -4  -7 2318.72 97.2677  35
  -1  -4  -8 2907.71 142.183   2
   1  -4   8 3000.40 151.623  25
  -1  -4  -8 3166.76 128.452  35
  -1  -4  -8 3113.67 144.143  24
   1  -4   8 3065.86 132.245  23
   1  -4   8 3148.86 137.111  21
  -1  -4  -9 1152.02 65.1029  21
  -1  -4  -9 973.389 73.2496   2
   1  -4   9 1192.26 87.4144  25
   1  -4   9 1244.91 60.8863  23
  -1  -4  -9 1259.42 52.8142  35
   1  -4   9 1185.79 64.9115  21
  -1  -4  -9 1097.89 76.7287  24
   1  -4  10 1551.91 72.6850  23
   1  -4  10 1577.26 97.9076  25
  -1  -4 -10 1472.63 85.0765   2
  -1  -4 -10 1470.21 84.9301  24
  -1  -4 -10 1467.88 77.3636  21
   1  -4  10 1568.45 76.6130  21
   1  -4  11 5124.73 208.115  23
   1  -4  11 4814.87 204.908   9
  -1  -4 -11 5128.63 215.485  24
   1  -4  11 5065.54 205.280  10
   1  -4  12 3364.63 138.659  23
   1  -4  12 3247.60 134.708  10
   1  -4  12 3118.56 134.151   9
   1  -4  13 189.341 25.9011   9
   1  -4  13 163.642 41.7194  23
   1  -4  13 194.528 28.1984  10
   1  -4  14 2256.24 93.9242   9
   1  -4  14 2266.86 94.9364  10
   1  -4  14 2044.96 93.1939   8
   1  -4  15 364.549 29.7828  11
   1  -4  15 285.171 27.6733   8
   1  -4  16 241.457 27.2876   8
   1  -4  16 206.536 28.9499  11
   1  -4  17 41.0855 28.9878  11
   1  -4  17 80.7706 27.0574   8
   1  -4  18 412.999 37.8324  11
   1  -4  18 435.966 34.7546   8
   1  -4  19 1863.18 83.4278   8
   1  -4  19 1752.68 97.5303  23
   1  -4  20 256.019 60.5694  23
   1  -4  20 221.613 33.9643   8
   1  -4  21 82.8846 31.4166   8
   1  -4  21 116.113 28.7109   4
   1  -4  21 113.121 61.1944  23
   1  -4  22 433.873 63.1087  23
   1  -4  22 418.463 36.7344   8
   1  -4  22 487.551 34.1703   4
   1  -4  23 576.037 39.3047   8
   1  -4  23 520.659 62.8032  23
   1  -4  23 633.289 37.2655   4
   1  -4  24 260.547 28.4039   4
   1  -4  24 272.815 30.7016   8
   1  -4  24 177.073 54.5854  23
   1  -4  24 277.791 36.1233   9
   1  -4  25 62.1631 27.1281   8
   1  -4  25 118.272 24.1893   4
   1  -4  25 67.7836 48.6873  23
   1  -4  25 43.6925 34.3864  33
   1  -4  26 103.044 45.8565  23
   1  -4  26 124.604 32.9240  33
   1  -4  27 376.979 44.5905  23
   1  -4  27 356.397 34.2931  33
   1  -4  28 66.4880 26.7586  33
   1  -4  28 54.0555 35.8583  23
   1  -4  29 366.613 29.4198  33
   1  -4  29 455.166 35.8994  23
   1  -4  30 37.7167 24.5987  23
  -1  -3  31 48.0290 26.4612  23
  -1  -3  31 35.9034 21.6213  19
  -1  -3  31 26.6523 22.9263  33
  -1  -3  30 25.6839 20.5149  13
  -1  -3  30 7.27348 25.2371  19
  -1  -3  30-7.65631 31.5850  23
  -1  -3  30 33.6440 27.1072  33
  -1  -3  29 403.619 41.8139  23
  -1  -3  29 359.977 36.9033  33
  -1  -3  29 428.508 30.8017  13
  -1  -3  29 420.441 34.3179  19
  -1  -3  28 70.4313 35.4748  33
  -1  -3  28 124.501 28.6819  13
  -1  -3  28 135.744 31.0512  19
  -1  -3  28 75.7968 41.5110  23
  -1  -3  27 442.512 38.7752  19
  -1  -3  27 294.790 43.4187  33
  -1  -3  27 486.386 36.6160  13
  -1  -3  27 349.394 49.7671  23
  -1  -3  26 90.0842 34.3950  19
  -1  -3  26 101.550 50.1376  23
  -1  -3  26 134.065 32.2804  13
  -1  -3  25 108.205 33.2632   9
  -1  -3  25 93.0512 53.5010  23
  -1  -3  25 83.0355 25.4195   8
  -1  -3  25 57.4053 35.3384  19
  -1  -3  25 104.276 33.7094  13
  -1  -3  24 127.498 55.1625  23
  -1  -3  24 92.5688 33.7830  13
  -1  -3  24 85.1593 33.5061   9
  -1  -3  24 93.1348 26.5360   8
  -1  -3  23 228.076 29.7988   8
  -1  -3  23 297.350 37.7654  13
  -1  -3  23 178.811 56.1609  23
  -1  -3  23 273.514 36.2157   9
  -1  -3  23 231.533 42.2750  11
  -1  -3  22 728.089 45.3262  13
  -1  -3  22 698.915 64.4339  23
  -1  -3  22 701.504 50.0610  11
  -1  -3  22 739.925 46.2738   9
  -1  -3  22 651.222 41.2880   8
  -1  -3  21 635.418 40.5034   8
  -1  -3  21 738.071 44.1136  13
  -1  -3  21 648.331 48.1913  11
  -1  -3  21 688.625 45.0768   9
  -1  -3  21 724.445 61.1660  23
  -1  -3  20 1775.84 81.8491   9
  -1  -3  20 1756.54 80.3842   8
  -1  -3  20 1868.49 84.7763  11
  -1  -3  20 1724.71 92.1174  23
  -1  -3  20 1865.44 78.9539   4
  -1  -3  20 1759.22 81.8874  13
  -1  -3  19 356.368 37.6699  11
  -1  -3  19 372.756 30.8889   8
  -1  -3  19 448.331 33.8719  13
  -1  -3  19 408.200 33.9303   9
  -1  -3  19 363.793 50.4606  23
  -1  -3  18 894.469 47.8595  13
  -1  -3  18 930.671 47.6141   9
  -1  -3  18 932.476 61.1621  23
  -1  -3  18 942.705 50.7476  11
  -1  -3  18 914.225 46.0208   8
  -1  -3  17 560.099 36.0737   9
  -1  -3  17 635.722 39.0013  11
  -1  -3  17 613.996 36.7858  13
  -1  -3  17 595.411 34.1489   8
  -1  -3  17 636.407 51.3162  23
  -1  -3  16 269.350 25.9988  13
  -1  -3  16 327.401 42.3128  23
  -1  -3  16 257.538 24.4534   8
  -1  -3  16 268.176 29.3063  11
  -1  -3  16 287.333 37.8302  14
  -1  -3  16 267.698 26.2715   9
  -1  -3  15 459.923 31.9927  11
  -1  -3  15 466.388 39.1672  14
  -1  -3  15 394.608 43.1558  23
  -1  -3  15 441.118 28.8714  13
  -1  -3  15 388.720 27.3633   8
  -1  -3  15 417.885 29.0320   9
  -1  -3  14 2011.48 86.8645  14
  -1  -3  14 1809.40 81.5514   9
  -1  -3  14 1850.65 95.9749   1
  -1  -3  14 2082.90 88.7005  23
  -1  -3  14 1816.32 102.510  25
  -1  -3  12 1029.62 65.3967   1
  -1  -3  12 1049.15 55.6701  23
  -1  -3  12 972.952 76.0748  25
   1  -3 -12 1076.33 66.0497   2
  -1  -3  12 1057.35 57.3228  21
   1  -3 -12 983.116 57.4783  21
   1  -3 -11 560.511 42.5984  21
  -1  -3  11 560.853 40.0019  23
  -1  -3  11 610.872 66.4190  25
   1  -3 -11 454.041 52.5766   2
  -1  -3  11 487.559 51.8313   1
  -1  -3  11 527.108 41.9546  21
  -1  -3  10 2703.00 129.955  25
   1  -3 -10 2742.92 121.090  24
  -1  -3  10 2528.60 122.439   1
   1  -3 -10 2558.23 122.104   2
   1  -3 -10 2602.93 117.883  21
  -1  -3  10 2756.72 117.795  21
   1  -3  -9 2284.29 101.328  21
  -1  -3   9 2229.05 101.437  21
   1  -3  -9 2139.18 107.404  24
  -1  -3   9 2149.74 117.037  25
   1  -3  -9 2260.44 107.897   2
  -1  -3   9 2263.47 106.792   1
   1  -3  -8 2012.74 93.3319   2
  -1  -3   8 1901.12 104.906  25
  -1  -3   8 2025.28 94.5468   1
   1  -3  -8 1832.06 96.3970  24
   1  -3  -8 1870.31 87.5822  21
  -1  -3   7 17492.7 548.709  23
   1  -3  -7 17446.4 554.367   2
   1  -3  -7 18128.8 555.129  24
  -1  -3   7 17748.7 555.773   1
  -1  -3   7 17719.1 559.538  24
  -1  -3   7 18062.4 559.016  25
  -1  -3   6 2662.92 132.369  24
  -1  -3   6 2842.54 129.499  25
   1  -3  -6 2659.84 109.549   1
   1  -3  -6 2531.25 118.271   2
   1  -3  -6 2709.29 124.673  24
  -1  -3   6 2569.74 119.645   1
   1  -3  -5 4848.16 204.334   2
   1  -3  -5 4847.18 199.061   1
  -1  -3   5 4894.38 213.403  24
  -1  -3   5 4783.42 205.714   1
   1  -3  -5 4833.17 209.279  24
  -1  -3   5 4881.86 211.418  25
   1  -3  -4 383.086 51.6575  25
  -1  -3   4 509.061 35.0315  20
   1  -3  -4 508.027 33.5794   1
  -1  -3   4 543.572 62.9437  25
   1  -3  -4 517.361 64.5946  24
  -1  -3   4 532.676 73.7614  24
   1  -3  -4 464.826 43.0219   2
   1  -3  -3 460.598 31.4836  20
   1  -3  -3 400.180 42.7188   2
  -1  -3   3 574.869 71.5594  24
   1  -3  -3 402.015 35.0598   1
  -1  -3   3 463.285 62.0197  25
   1  -3  -3 500.007 66.0849  24
   1  -3  -3 386.088 52.8741  25
  -1  -3   3 396.002 33.0672  20
  -1  -3   2 44.6329 67.2237  24
   1  -3  -2 14.8079 37.7060   2
   1  -3  -2 15.5857 22.7899  20
   1  -3  -2 9.15529 30.2440   1
  -1  -3   2 14.9590 27.1107  20
   1  -3  -2 26.5301 51.0316  25
  -1  -3   1 803.338 45.2848  20
   1  -3  -1 796.450 65.7428  25
   1  -3  -1 851.694 41.5753  20
   1  -3  -1 766.870 52.7456   2
  -1  -3   1 875.407 77.4977  24
  -1  -3   1 887.080 52.8326   1
  -1  -3   0 134.714 64.8819  24
   1  -3   0 38.0148 55.1346  25
   1  -3   0 66.6563 19.7948  20
  -1  -3   0 79.6359 26.9079  20
  -1  -3   0 56.4449 34.1205   1
  -1  -3  -1 343.319 65.3866  24
   1  -3   1 249.024 22.0201  20
  -1  -3  -1 172.169 42.1862   2
   1  -3   1 282.880 70.9896  24
  -1  -3  -1 228.749 31.0792  20
  -1  -3  -1 284.525 35.2640   1
   1  -3   2 715.135 46.7493  21
   1  -3   2 712.801 77.4656  24
  -1  -3  -2 750.399 45.7298   1
  -1  -3  -2 761.821 43.4559  20
   1  -3   3 1700.71 78.3186  21
   1  -3   3 1503.20 92.4327  25
  -1  -3  -3 1714.35 76.6917  20
  -1  -3  -3 1575.38 73.8312   1
   1  -3   4 755.378 46.4793  21
   1  -3   4 756.746 69.3746  25
  -1  -3  -4 804.666 41.1067   1
  -1  -3  -4 704.944 47.1332  20
  -1  -3  -5 620.686 33.6550   1
  -1  -3  -5 549.338 63.4572  24
   1  -3   5 511.448 42.4921  21
   1  -3   5 572.212 68.6299  25
   1  -3   6 1690.89 102.899  25
  -1  -3  -6 1910.17 98.0244  24
  -1  -3  -6 1940.20 80.8826   1
   1  -3   6 1843.94 87.0266  21
   1  -3   7 6360.27 257.476  23
   1  -3   7 6140.88 268.983  25
   1  -3   7 6299.24 261.117  21
  -1  -3  -7 6100.17 264.539  24
  -1  -3  -8 6073.19 251.907  24
   1  -3   8 5851.42 257.582  25
   1  -3   8 6185.76 249.185  21
   1  -3   8 6008.27 245.307  23
  -1  -3  -8 5664.27 248.950  21
   1  -3   9 574.839 68.5715  25
  -1  -3  -9 539.538 55.9414  24
   1  -3   9 558.972 39.4210  23
  -1  -3  -9 541.213 43.7989  21
   1  -3   9 511.724 41.6846  21
  -1  -3 -10 2039.38 99.3758  21
  -1  -3 -10 2065.36 103.461  24
   1  -3  10 2158.10 98.0226  21
   1  -3  10 2202.77 92.4471  32
   1  -3  10 2128.93 114.401  25
   1  -3  11 102.113 63.4809  25
  -1  -3 -11 42.2084 35.6209  21
   1  -3  11 85.4171 28.8988  32
   1  -3  11 105.330 34.5614  21
   1  -3  12 1613.45 97.5249  25
  -1  -3 -12 1709.95 81.0842  21
   1  -3  12 1589.91 74.8365  32
   1  -3  12 1689.34 79.8786  21
   1  -3  13 140.353 26.7544  10
   1  -3  13 198.263 68.0406  25
   1  -3  14 3691.48 174.225  25
   1  -3  14 3683.25 159.079  32
   1  -3  14 3859.98 160.903  23
   1  -3  14 3964.11 157.624  11
   1  -3  14 3656.57 156.056   8
   1  -3  15 1574.13 71.8926   8
   1  -3  15 1711.49 74.8433  11
   1  -3  15 1664.27 72.6438  13
   1  -3  15 1714.92 82.0584  23
   1  -3  15 1464.16 77.8184  32
   1  -3  16 4062.82 165.289  13
   1  -3  16 4273.93 166.934  11
   1  -3  16 3936.19 164.755   8
   1  -3  16 4001.56 170.242  23
   1  -3  17 1410.96 64.3903  13
   1  -3  17 1468.38 67.0302  11
   1  -3  17 1341.91 63.7121   8
   1  -3  17 1313.83 74.9820  23
   1  -3  17 1410.77 71.6955  32
   1  -3  18 1370.48 73.7211  32
   1  -3  18 1341.92 65.0688   8
   1  -3  18 1455.67 78.5612  23
   1  -3  18 1424.79 65.4352  13
   1  -3  18 1460.36 68.5858  11
   1  -3  19 420.756 33.8500  13
   1  -3  19 385.921 35.7215   9
   1  -3  19 368.378 32.8085   8
   1  -3  19 342.955 54.5046  23
   1  -3  19 414.399 39.0704  11
   1  -3  20 1212.96 63.9121  13
   1  -3  20 1422.35 61.8253   4
   1  -3  20 1302.53 65.1282   9
   1  -3  20 1266.21 62.6090   8
   1  -3  20 1267.41 79.9467  23
   1  -3  20 1357.47 68.6358  11
   1  -3  21 409.467 62.1577  23
   1  -3  21 478.027 36.5864   8
   1  -3  21 566.091 35.2530   4
   1  -3  21 497.047 39.0577  13
   1  -3  21 468.285 40.0310   9
   1  -3  22 2679.03 110.645   4
   1  -3  22 2455.32 123.341  23
   1  -3  22 2569.92 112.695  13
   1  -3  22 2591.09 110.902   8
   1  -3  22 2450.15 112.746   9
   1  -3  23 903.309 47.8903   8
   1  -3  23 859.108 50.9670  13
   1  -3  23 907.315 51.4988   9
   1  -3  23 919.678 47.1728   4
   1  -3  23 837.066 70.5215  23
   1  -3  24 687.460 38.3434   4
   1  -3  24 615.369 38.9833   8
   1  -3  24 608.624 42.6638  13
   1  -3  24 526.889 62.4491  23
   1  -3  25 42.5448 50.5081  23
   1  -3  25-8.02189 30.3995  13
   1  -3  25 31.6815 24.6963   4
   1  -3  26-13.1813 28.2590  13
   1  -3  26 25.6369 46.9606  23
   1  -3  27 17.4009 26.2292  13
   1  -3  27-49.3292 43.2672  23
   1  -3  28 282.971 31.9533  19
   1  -3  28 237.742 25.8865  13
   1  -3  28 192.880 41.0855  23
   1  -3  28 157.606 33.8799  33
   1  -3  29 145.938 35.6774  23
   1  -3  29 211.432 27.5551  19
   1  -3  29 132.293 29.8949  33
   1  -3  30 98.0461 29.9509  23
   1  -3  30 102.577 25.6150  33
   1  -3  30 128.326 24.3416  19
   1  -3  31 117.515 20.8730  19
  -1  -2  32 183.127 22.7047  19
  -1  -2  32 184.064 25.2932  12
  -1  -2  31 835.341 42.8997  19
  -1  -2  31 877.185 42.2409  13
  -1  -2  30 187.110 28.4426  19
  -1  -2  30 127.086 27.7767  13
  -1  -2  30 104.007 34.2468  23
  -1  -2  29-3.95132 29.4309  13
  -1  -2  29-14.9225 37.7851  23
  -1  -2  29 30.3271 29.7757  19
  -1  -2  28 174.020 32.2991  19
  -1  -2  28 106.103 42.0219  23
  -1  -2  28 156.731 33.5604  13
  -1  -2  27 187.536 46.0075  23
  -1  -2  27 165.983 35.3348  13
  -1  -2  27 183.280 33.8576  19
  -1  -2  26 230.440 37.1961  13
  -1  -2  26 211.505 50.4176  23
  -1  -2  26 236.146 35.6750  19
  -1  -2  25 1296.38 64.7788  19
  -1  -2  25 1284.79 65.8559  13
  -1  -2  25 1155.30 75.0105  23
  -1  -2  24 332.907 39.8012  13
  -1  -2  24 393.228 55.1862  23
  -1  -2  24 350.052 44.3362  11
  -1  -2  24 421.887 39.1824  19
  -1  -2  23 953.919 55.1848  13
  -1  -2  23 979.701 52.9279   9
  -1  -2  23 897.726 59.6232  11
  -1  -2  23 946.309 47.8541   8
  -1  -2  23 921.504 68.1048  23
  -1  -2  22 1478.21 84.2862  23
  -1  -2  22 1592.91 73.4709   9
  -1  -2  22 1595.09 75.1114  13
  -1  -2  22 1554.68 70.1044   8
  -1  -2  22 1506.30 77.8751  11
  -1  -2  21 385.333 40.8212  11
  -1  -2  21 364.043 51.4692  23
  -1  -2  21 409.168 36.1101   9
  -1  -2  21 414.830 37.1408  13
  -1  -2  21 394.396 30.5028   8
  -1  -2  20 1429.31 72.0181  11
  -1  -2  20 1426.20 70.0002  13
  -1  -2  20 1516.44 68.8517   9
  -1  -2  20 1524.70 66.5360   8
  -1  -2  20 1382.97 78.7666  23
  -1  -2  19 175.402 37.8611  14
  -1  -2  19 151.745 28.7829  13
  -1  -2  19 135.258 27.9383   9
  -1  -2  19 158.287 33.0214  11
  -1  -2  19 162.037 23.7903   8
  -1  -2  19 172.532 42.3036  32
  -1  -2  19 170.471 45.1102  23
  -1  -2  18 1574.98 74.4317  14
  -1  -2  18 1504.13 68.6051  13
  -1  -2  18 1448.86 76.1137  23
  -1  -2  18 1506.10 70.6532  11
  -1  -2  18 1525.85 75.3580  32
  -1  -2  18 1492.96 67.3252   9
  -1  -2  18 1429.56 66.1998   8
  -1  -2  17 552.028 33.0654   9
  -1  -2  17 514.518 45.7450  23
  -1  -2  17 543.294 31.5305   8
  -1  -2  17 520.674 44.7859  32
  -1  -2  17 562.151 42.0727  14
  -1  -2  17 571.842 37.7743  11
  -1  -2  17 558.173 34.5584  13
  -1  -2  16 219.479 36.6487  32
  -1  -2  16 229.490 27.6241  11
  -1  -2  16 160.744 38.0171  23
  -1  -2  16 186.223 33.0948  14
  -1  -2  16 222.684 23.0633   9
  -1  -2  16 198.240 24.8796  13
  -1  -2  16 166.531 21.0405   8
  -1  -2  15 1279.56 66.3524  23
  -1  -2  15 1255.17 72.2623   1
  -1  -2  15 1285.49 61.1125  11
  -1  -2  15 1320.18 64.3067  14
  -1  -2  15 1272.41 65.9304  32
   1  -2 -15 1391.65 69.3348  21
  -1  -2  15 1318.11 58.3405   9
  -1  -2  14 6682.07 272.798  23
  -1  -2  14 6695.80 276.769  21
  -1  -2  14 6607.93 279.778  25
  -1  -2  14 6629.44 272.646  32
   1  -2 -14 6887.59 276.811  21
  -1  -2  14 6093.81 277.799   1
  -1  -2  13 3524.03 150.445  23
   1  -2 -13 3416.97 154.000  21
  -1  -2  13 3695.21 149.910  32
  -1  -2  13 3697.47 153.943  21
  -1  -2  13 3317.18 156.625   1
  -1  -2  13 3563.16 160.627  25
  -1  -2  12 2422.95 102.927  23
  -1  -2  12 2322.71 102.398  32
  -1  -2  12 2155.17 109.029   1
  -1  -2  12 2437.95 105.818  21
  -1  -2  12 2474.92 115.700  25
   1  -2 -12 2368.48 106.080  21
  -1  -2  11 419.309 59.1448  25
  -1  -2  10 1138.40 56.0582  32
  -1  -2  10 1136.24 58.5532  21
  -1  -2  10 1157.61 75.4302  25
   1  -2 -10 1214.37 59.4102  21
  -1  -2  10 1197.07 56.6304  23
  -1  -2   9 301.762 32.0908  21
   1  -2  -9 289.959 41.5433  24
   1  -2  -9 291.894 32.6879  21
  -1  -2   9 294.002 57.8492  25
   1  -2  -8 15263.2 618.597  21
  -1  -2   8 15330.3 618.785  21
  -1  -2   8 14771.4 621.712  25
   1  -2  -8 15177.6 618.182  24
   1  -2  -7 8485.93 345.272  21
  -1  -2   7 8275.43 350.148  25
  -1  -2   7 8389.37 345.548  21
   1  -2  -7 8422.46 346.339  24
   1  -2  -6 5619.90 227.559  24
  -1  -2   6 5299.26 224.591  21
  -1  -2   6 5440.60 231.670  25
  -1  -2   5 353.346 60.5488  25
   1  -2  -5 279.307 55.3185  24
   1  -2  -4 2795.22 126.026  24
  -1  -2   4 2750.09 130.351  24
   1  -2  -4 2685.97 111.017   1
   1  -2  -4 2628.63 117.621  25
  -1  -2   4 2677.10 127.440  25
  -1  -2   4 2562.42 114.827  20
  -1  -2   3 49202.5 1978.31   1
  -1  -2   3 47908.4 1977.30  20
  -1  -2   3 49420.9 1979.61  24
   1  -2  -3 48968.2 1977.68  25
  -1  -2   3 49046.4 1979.57  25
   1  -2  -3 49377.9 1976.19   1
   1  -2  -3 47792.0 1977.48   2
  -1  -2   2 1102.28 82.1581  24
   1  -2  -2 1044.68 58.4893   2
  -1  -2   2 1065.11 74.7599  25
   1  -2  -2 1116.06 67.5180  25
  -1  -2   2 1057.32 54.3453  20
  -1  -2   1 87919.4 3448.22  20
  -1  -2   1 82210.9 3449.64  24
   1  -2  -1 82242.9 3448.07   2
   1  -2  -1 86419.7 3447.01  20
   1  -2   0 8119.60 315.547  20
  -1  -2   0 7428.48 323.409  24
  -1  -2   0 7722.48 317.587  20
   1  -2   0 7230.48 317.846   2
   1  -2   0 7311.28 324.422  24
  -1  -2  -1 74699.8 2963.63  20
  -1  -2  -1 74302.6 2964.90  24
  -1  -2  -1 72349.8 2963.17   1
   1  -2   1 72643.3 2961.92  20
  -1  -2  -2 8041.74 319.257  20
  -1  -2  -2 7570.48 317.782   1
   1  -2   2 7825.59 324.081  25
  -1  -2  -3 5136.02 209.528   1
   1  -2   3 4946.07 218.593  25
   1  -2   4 8180.28 339.409  25
  -1  -2  -4 8149.04 332.146   1
  -1  -2  -5 26603.8 1077.19  24
   1  -2   5 25165.6 1079.07  25
  -1  -2  -5 26795.5 1073.87   1
  -1  -2  -6 40845.9 1648.91  24
   1  -2   6 40363.2 1651.18  25
   1  -2   7 3366.29 152.736  25
  -1  -2  -7 3271.05 145.355   2
  -1  -2  -7 3439.46 146.247  24
   1  -2   8 4435.69 191.614  25
  -1  -2  -8 4243.99 185.708   2
  -1  -2  -8 4516.34 186.253  24
  -1  -2  -9 4318.69 179.273   2
   1  -2   9 3927.47 184.250  25
   1  -2  10 4263.30 175.619  32
  -1  -2 -10 4159.36 181.405   2
   1  -2  10 4278.13 187.265  25
   1  -2  11 2253.43 120.900  25
   1  -2  11 2168.26 102.965  32
  -1  -2 -12 1488.40 78.4215   2
   1  -2  12 1557.15 70.1983  32
  -1  -2 -12 1491.90 74.1020  21
   1  -2  12 1446.52 88.8090  25
   1  -2  13 3464.49 147.973  32
  -1  -2 -13 3640.09 156.665   2
   1  -2  13 3458.64 160.306  25
  -1  -2 -13 3458.72 152.923  21
   1  -2  14 2241.70 116.207  25
   1  -2  14 2260.07 98.2963   9
   1  -2  14 2439.79 103.947  23
  -1  -2 -14 2429.20 107.150  21
   1  -2  14 2376.73 102.688  32
   1  -2  15 864.035 51.7265  32
   1  -2  15 971.303 53.6503  23
   1  -2  15 841.668 45.5738  11
   1  -2  15 836.980 42.1257   9
   1  -2  15 830.686 41.7014   8
   1  -2  16 1092.39 50.9490  13
   1  -2  16 1034.45 50.1694   9
   1  -2  16 1070.59 60.9813  23
   1  -2  16 1044.70 53.1990  11
   1  -2  16 1095.42 58.5778  32
   1  -2  16 1010.23 49.5335   8
   1  -2  17 638.094 39.2401   9
   1  -2  17 697.177 38.2302   8
   1  -2  17 733.157 52.8258  23
   1  -2  17 728.466 40.3197  13
   1  -2  17 789.411 50.3718  32
   1  -2  17 722.193 43.1794  11
   1  -2  18 1031.89 51.3966  13
   1  -2  18 1007.21 54.4796  11
   1  -2  18 992.051 63.2145  23
   1  -2  18 1040.67 48.3952   4
   1  -2  18 900.247 60.5426  32
   1  -2  18 957.880 48.5969   8
   1  -2  18 997.124 50.3860   9
   1  -2  19 127.962 48.4940  23
   1  -2  19 72.9694 24.7754   4
   1  -2  19 74.6438 34.6890  11
   1  -2  19 58.4620 24.5434   8
   1  -2  19 79.4129 28.7933   9
   1  -2  19 106.525 44.5194  32
   1  -2  19 94.7767 29.5575  13
   1  -2  20 820.437 61.6162  23
   1  -2  20 786.868 47.5090  13
   1  -2  20 767.809 42.5794   8
   1  -2  20 809.744 51.3090  11
   1  -2  20 810.911 42.6850   4
   1  -2  20 812.715 59.5068  32
   1  -2  20 802.654 45.9024   9
   1  -2  21 1630.70 79.0039  13
   1  -2  21 1625.41 75.1533   8
   1  -2  21 1613.31 90.4410  23
   1  -2  21 1847.48 75.4863   4
   1  -2  21 1724.79 88.0362  32
   1  -2  21 1669.25 82.7852  11
   1  -2  21 1564.19 77.1890   9
   1  -2  22-6.30448 34.3030  13
   1  -2  22-3.76355 26.0954   8
   1  -2  22 45.3641 55.2921  23
   1  -2  22-2.71849 26.5240   4
   1  -2  22 15.6060 33.6832  19
   1  -2  22 6.67959 31.9822   9
   1  -2  23 568.165 62.1465  23
   1  -2  23 663.263 38.3523   4
   1  -2  23 539.333 44.3587  13
   1  -2  23 564.986 44.6403  19
   1  -2  23 610.630 38.0156   8
   1  -2  24 116.994 34.7649  19
   1  -2  24 40.6897 52.8611  23
   1  -2  24 59.0573 27.0192   4
   1  -2  24 115.811 35.1110  13
  -1  -2 -25 53.3016 43.9157   3
   1  -2  25 73.7938 26.6984   4
   1  -2  25 51.1745 33.7244  13
   1  -2  25 43.1048 34.5398  19
   1  -2  25 88.8137 51.3173  23
   1  -2  26 222.074 34.9492  13
   1  -2  26 183.997 35.9340  19
   1  -2  26 189.094 49.2923  23
  -1  -2 -26 193.752 42.9553   3
   1  -2  27 206.208 35.2218  19
   1  -2  27 180.674 33.2801  13
   1  -2  27 170.296 46.6719  23
   1  -2  28 0.56089 28.1625  13
   1  -2  28 21.8819 40.8417  23
   1  -2  28-12.0588 31.2738  19
   1  -2  29 31.5142 25.6278  13
   1  -2  29 9.53062 28.6552  19
   1  -2  29 78.6787 36.4633  23
   1  -2  30 4.18379 27.4467  33
   1  -2  30 59.2755 31.0603  23
   1  -2  30 10.5971 26.0824  19
   1  -2  31 181.454 27.7152  23
   1  -2  31 240.444 25.0748  19
   1  -2  31 186.680 26.3670  33
  -1  -1  32 167.201 26.9363  12
  -1  -1  32 193.921 23.5586  19
  -1  -1  32 145.239 25.7198  33
  -1  -1  31 66.8974 25.7472  13
  -1  -1  31 61.7139 28.4831  33
  -1  -1  31 60.8779 24.8184  19
  -1  -1  30-9.45854 28.6766  13
  -1  -1  30 16.6744 32.9916  33
  -1  -1  30 33.9528 27.4239  19
  -1  -1  29 166.005 37.5737  23
  -1  -1  29 235.930 34.6057  13
  -1  -1  29 190.364 32.2679  19
  -1  -1  28 542.255 41.8399  19
  -1  -1  28 592.802 44.0696  13
  -1  -1  28 543.638 48.1409  23
  -1  -1  27 174.060 38.2449  13
  -1  -1  27 186.234 34.2954  19
  -1  -1  27 179.724 44.8455  23
  -1  -1  26 1002.32 64.0594  23
  -1  -1  26 997.980 55.3192  19
  -1  -1  26 981.987 58.7174  13
  -1  -1  25 827.805 61.9594  23
  -1  -1  25 843.031 51.3162  19
  -1  -1  25 893.643 54.8720  13
  -1  -1  24 330.293 52.7390  23
  -1  -1  24 387.037 38.4422  19
  -1  -1  24 471.275 43.2259  13
  -1  -1  23 129.326 37.1334  13
  -1  -1  23 84.4499 32.5036  19
  -1  -1  23 118.600 47.6849  23
  -1  -1  22 594.351 41.3387  19
  -1  -1  22 530.884 52.7257  23
  -1  -1  22 564.338 44.0632  13
  -1  -1  21 813.507 45.0998   9
  -1  -1  21 776.555 47.7375  13
  -1  -1  21 846.404 58.2718  23
  -1  -1  21 790.017 40.9695   8
  -1  -1  20 196.449 22.5398   8
  -1  -1  20 183.950 27.8049   9
  -1  -1  20 177.972 31.5598  13
  -1  -1  20 170.574 42.9716  23
  -1  -1  19 877.720 45.0152   9
  -1  -1  19 820.222 53.0269  14
  -1  -1  19 786.293 55.0435  23
  -1  -1  19 866.952 41.7534   8
  -1  -1  19 855.897 46.9913  13
  -1  -1  18 568.476 30.7126   8
  -1  -1  18 534.365 45.9219  23
  -1  -1  18 491.450 42.6124  14
  -1  -1  18 584.653 34.2979   9
  -1  -1  18 537.166 35.9434  13
  -1  -1  17 1300.70 57.7953   8
  -1  -1  17 1355.37 66.4464  23
  -1  -1  17 1252.33 60.6227  13
  -1  -1  17 1325.25 65.0082  14
  -1  -1  17 1319.11 59.5712   9
  -1  -1  16 277.529 33.4483  14
  -1  -1  16 330.485 27.5401  13
  -1  -1  16 347.069 25.9918   9
  -1  -1  16 329.642 37.2249  23
   1  -1 -15 3088.74 144.778  21
  -1  -1  15 3295.49 144.253  21
   1  -1 -15 3265.66 148.214   2
  -1  -1  15 3334.47 139.006  23
  -1  -1  14 441.712 42.7570   1
  -1  -1  14 518.204 41.6448  21
  -1  -1  14 558.327 39.1316  23
   1  -1 -14 459.004 48.1551   2
   1  -1 -14 579.158 43.3423  21
  -1  -1  13 1209.68 69.3466  25
  -1  -1  13 1314.03 63.8415  21
   1  -1 -13 1391.58 69.4395   2
   1  -1 -13 1184.39 64.6671  21
  -1  -1  13 1028.62 64.6956   1
  -1  -1  12 8504.32 342.041  21
   1  -1 -12 8201.75 342.388  21
   1  -1 -12 8434.67 343.789   2
  -1  -1  12 8011.43 342.935  25
   1  -1 -11 6922.87 271.888   2
  -1  -1  11 6253.68 272.071  25
   1  -1 -11 6391.87 270.219  21
  -1  -1  11 6502.58 269.882  21
   1  -1 -10 1651.39 77.6419  21
  -1  -1  10 1750.28 84.8778  25
  -1  -1  10 1669.28 76.6313  21
   1  -1 -10 1738.48 80.2527   2
  -1  -1   9 8302.49 328.180  21
   1  -1  -9 7846.16 328.458  21
  -1  -1   9 7723.32 330.557  25
  -1  -1   8 711.105 54.5771  25
  -1  -1   8 626.597 38.2044  21
   1  -1  -8 700.486 40.7205  21
  -1  -1   7 10221.8 420.029  25
   1  -1  -6 2399.30 109.504  24
  -1  -1   6 2764.76 116.986  25
   1  -1  -5 3386.63 145.930  24
  -1  -1   5 3596.16 151.317  25
  -1  -1   4 6869.15 284.439  25
   1  -1  -4 6903.60 282.378  24
  -1  -1   3 33762.2 1356.06  25
   1  -1  -3 33323.0 1354.26  25
  -1  -1   2 750.220 39.5988   1
  -1  -1   2 782.309 46.6008  25
  -1  -1   2 773.478 48.9037  24
  -1  -1   1 5186.36 215.443  24
  -1  -1   1 5132.06 215.050  25
  -1  -1   1 5286.88 213.552   1
  -1  -1   0 222.584 33.9112  24
   1  -1   1 2756.48 115.070  25
  -1  -1  -1 2618.75 115.008  24
  -1  -1  -2 5389.24 227.805  24
   1  -1   2 5692.21 228.641  25
   1  -1   3 95126.9 3965.68  25
  -1  -1  -3 98910.3 3963.79   1
   1  -1   4 13359.4 545.378  25
  -1  -1  -5 60433.0 2534.05  24
   1  -1   5 61616.5 2535.58  25
  -1  -1  -5 65648.9 2534.37  21
  -1  -1  -6 64510.8 2602.38  21
   1  -1   6 63899.4 2603.45  25
  -1  -1  -7 2357.07 101.476   2
   1  -1   7 2305.21 108.403  25
  -1  -1  -7 2198.41 99.9547  21
  -1  -1  -8 21156.9 889.893   2
   1  -1   8 22810.8 891.187  25
   1  -1   9 4984.57 218.226  25
  -1  -1  -9 5573.77 215.746   2
   1  -1   9 4865.70 213.105  21
   1  -1  10 2192.91 105.662  25
  -1  -1 -10 2149.69 100.080   2
   1  -1  10 2228.68 97.2128  21
  -1  -1 -12 9175.77 383.234   2
   1  -1  12 9534.19 382.141  21
   1  -1  12 9021.38 383.785  25
   1  -1  13 3943.90 185.309  25
   1  -1  13 4278.05 182.311  21
  -1  -1 -13 4539.44 184.892   2
  -1  -1 -14 1211.91 69.6207   2
   1  -1  14 1214.08 64.8769  21
   1  -1  15 2698.82 110.318  11
   1  -1  15 2483.81 107.768   9
   1  -1  16 1293.80 55.5845   8
   1  -1  16 1210.53 60.1425  11
   1  -1  16 1296.11 55.7445   4
   1  -1  16 1176.94 56.6816   9
   1  -1  16 1188.30 58.2114  13
   1  -1  17 624.576 42.4674  11
  -1  -1 -17 619.799 39.6110   7
   1  -1  17 632.857 34.8803   4
   1  -1  17 598.735 34.1708   8
   1  -1  17 623.400 36.6183   9
   1  -1  17 623.998 39.0933  13
   1  -1  18 775.313 37.8168   4
   1  -1  18 687.964 39.3418   9
  -1  -1 -18 651.830 40.9395   7
   1  -1  18 683.982 36.9117   8
   1  -1  18 691.049 41.7726  13
   1  -1  18 700.015 45.2271  11
   1  -1  19 1689.53 73.1253   4
   1  -1  19 1673.35 84.2515  23
  -1  -1 -19 1608.86 75.0457   7
   1  -1  19 1638.99 76.5324  13
   1  -1  19 1587.81 74.0559   9
   1  -1  19 1721.79 79.3654  11
   1  -1  19 1653.57 72.5463   8
   1  -1  20 144.330 30.3464  19
   1  -1  20 128.691 28.3818   9
   1  -1  20 194.470 26.1115   4
  -1  -1 -20 167.828 31.0895   7
   1  -1  20 169.523 37.3321  11
   1  -1  20 179.211 33.1789  13
   1  -1  20 193.803 24.5035   8
   1  -1  20 207.586 46.7384  23
   1  -1  21 153.529 39.8492  11
  -1  -1 -21 146.631 32.1510   7
   1  -1  21 146.557 32.1108  19
   1  -1  21 169.468 51.1165  23
   1  -1  21 150.123 34.3969  13
   1  -1  21 191.451 27.2921   4
   1  -1  22 351.188 39.5282  13
  -1  -1 -22 297.110 35.8086   7
   1  -1  22 310.250 36.1788  19
   1  -1  22 381.688 30.9902   4
   1  -1  22 324.028 53.8877  23
   1  -1  23 746.944 42.5134   4
   1  -1  23 713.963 49.9716  13
   1  -1  23 742.136 61.9561  23
   1  -1  23 715.434 46.9964  19
   1  -1  24 244.893 52.1781  23
   1  -1  24 329.947 36.8047  19
   1  -1  24 284.351 30.3400   4
   1  -1  24 257.373 40.0349  13
   1  -1  25 326.054 41.0085  13
   1  -1  25 292.931 51.1501  23
   1  -1  25 341.641 38.2840  19
   1  -1  25 357.915 30.9848   4
   1  -1  26 280.249 38.3740  13
   1  -1  26 197.367 48.4261  23
   1  -1  26 210.503 36.2801  19
   1  -1  27 466.398 42.0086  13
   1  -1  27 485.900 40.4037  19
   1  -1  27 443.211 49.0177  23
   1  -1  28 321.342 35.7772  13
   1  -1  28 210.642 42.6017  23
   1  -1  28 297.279 35.5601  19
  -1  -1 -29 484.350 41.5669   3
   1  -1  29 510.122 36.1783  19
   1  -1  29 418.897 36.0135  13
   1  -1  30-23.5066 26.8973  19
   1  -1  30 0.99338 30.9282  23
   1  -1  31 41.7471 25.7071  33
   1  -1  31 28.9335 23.3847  19
   1  -1  32 110.917 20.1646  19
   1  -1  32 61.5369 21.8013  33
  -1   0  32 1.53021 24.2682  33
  -1   0  32 32.5731 25.9272  12
  -1   0  31 280.032 33.6018  33
  -1   0  31 331.496 32.5252  13
  -1   0  31 378.074 29.7411  19
  -1   0  30 159.444 33.9337  12
  -1   0  30 156.480 33.5282  13
  -1   0  30 176.499 33.5884  33
  -1   0  30 144.574 28.9990  19
  -1   0  29 1.09995 30.0536  19
  -1   0  29 31.6983 34.3011  13
  -1   0  28-4.69604 31.4974  19
  -1   0  28 40.9378 36.8573  13
  -1   0  27 50.6787 38.3778  13
   1   0 -27 47.1324 31.7828   7
  -1   0  27 31.8982 33.0980  19
  -1   0  27 30.3738 40.3552  23
  -1   0  26 0.71674 41.5511  23
   1   0 -26-1.97490 33.6574   7
  -1   0  26 74.0369 39.1312  13
  -1   0  26 51.9380 32.8772  19
   1   0 -25 449.909 39.7125   7
  -1   0  25 440.511 48.3034  23
  -1   0  25 475.051 44.9184  13
  -1   0  25 391.353 38.3758  19
   1   0 -24 21.8939 34.6885   7
  -1   0  24 39.2679 32.0421  19
  -1   0  24 31.9398 37.8721  13
  -1   0  24 16.2778 44.2922  23
   1   0 -23 13.4502 34.6126   7
  -1   0  23-3.60695 43.7972  23
  -1   0  23-17.8070 31.0054  19
  -1   0  23 23.3347 39.8838  11
  -1   0  22 139.173 39.2042  11
  -1   0  22 242.112 31.3011  19
  -1   0  22 193.177 43.2269  23
  -1   0  22 247.410 50.3035  32
   1   0 -22 203.163 36.4604   7
  -1   0  21 138.902 35.2383  11
   1   0 -21 175.368 33.8466   7
  -1   0  21 177.985 46.0616  32
  -1   0  21 151.931 28.3906  19
  -1   0  21 143.051 41.2617  23
  -1   0  20 847.198 44.6637  19
  -1   0  20 764.484 53.4026  23
   1   0 -20 838.496 47.7085   7
  -1   0  20 760.756 56.1266  32
  -1   0  20 847.847 49.7468  11
  -1   0  19 251.539 33.7365  11
  -1   0  19 281.851 28.8811  19
  -1   0  19 313.622 42.3704  32
  -1   0  19 239.599 39.5683  23
   1   0 -19 305.405 32.6160   7
  -1   0  18 26.9951 34.7490  23
  -1   0  18 22.5555 27.1797  11
  -1   0  18 27.6511 32.3477  14
  -1   0  18 21.0448 22.1343   9
   1   0 -18 62.8413 27.3448   7
  -1   0  18 15.5775 36.6688  32
  -1   0  17 34.7009 25.8065  11
  -1   0  17 53.1759 36.3057  32
  -1   0  17 48.5727 21.4282   9
  -1   0  17 41.5846 30.3119  14
  -1   0  16 732.688 42.8444  11
  -1   0  16 830.739 45.9481  14
  -1   0  16 789.033 39.8930   9
  -1   0  16 886.901 48.6844  32
   1   0 -15 696.163 53.0849  21
  -1   0  15 767.985 46.7140  32
   1   0 -15 824.017 55.5444   2
  -1   0  15 730.053 49.4023  21
   1   0 -14 12817.5 548.585  21
   1   0 -14 13861.4 549.074   2
  -1   0  14 13050.6 547.626  21
  -1   0  14 13308.7 543.805  32
  -1   0  14 12843.3 545.127   1
  -1   0  14 14514.4 547.280  24
  -1   0  13 7635.06 347.449  25
  -1   0  13 7962.42 349.906   1
  -1   0  13 9238.01 352.418  21
  -1   0  13 8821.84 352.151  24
  -1   0  13 8010.98 347.549  32
   1   0 -13 8491.78 353.033  21
  -1   0  12 7209.01 299.098  21
   1   0 -12 7005.33 299.690   2
  -1   0  12 6673.50 296.931   1
  -1   0  12 7575.77 295.846  32
  -1   0  12 7134.60 296.344  25
  -1   0  12 7684.30 298.945  24
  -1   0  11 164.240 34.3962  25
  -1   0  11 162.181 27.8057  32
  -1   0  11 208.405 31.7326  21
  -1   0  11 157.405 42.2495  24
  -1   0  10 624.026 40.5183  21
  -1   0  10 701.633 43.2578  25
  -1   0  10 593.998 47.1378  24
  -1   0   9 6366.29 261.143  21
  -1   0   9 6292.72 260.124  25
  -1   0   8 4601.65 201.565  21
  -1   0   8 5107.15 201.332  25
  -1   0   7 3696.00 158.489  21
  -1   0   7 3876.15 158.745  25
   1   0  -6 44.0369 27.9850  25
  -1   0   6 81.2555 33.3793  25
  -1   0   5 3273.09 131.159  25
   1   0  -5 3026.82 130.323  25
   1   0  -4 1716.59 73.5626  25
  -1   0   3 6271.25 254.926   1
   1   0  -2 2167.32 89.5013  20
  -1   0  -2 287.013 16.9374  21
  -1   0  -3 10470.8 425.267  21
  -1   0  -4 7937.02 327.391  21
   1   0   4 8150.93 327.822  25
  -1   0  -5 5189.34 216.043  21
   1   0   5 5287.92 216.813  25
   1   0   6 34495.1 1390.54  25
  -1   0  -6 34094.2 1390.84  21
   1   0   8 2267.37 103.505  21
  -1   0  -8 2537.93 105.181   2
   1   0   8 2337.10 106.680  25
  -1   0  -8 2457.81 104.838  21
  -1   0  -9 3883.67 159.094   2
   1   0   9 3505.10 159.368  25
   1   0   9 3648.53 157.559  21
  -1   0  -9 3915.86 158.475  21
  -1   0 -10 4130.04 176.102   2
  -1   0 -10 4518.52 175.914  21
   1   0  10 4148.22 176.295  25
   1   0  10 3767.68 174.809  21
   1   0  10 4335.85 177.626  24
   1   0  11 12143.7 486.645  21
   1   0  11 11372.5 482.496  34
   1   0  11 11691.9 486.297  25
  -1   0 -11 12754.0 487.473  21
   1   0  11 10989.3 483.100  32
   1   0  11 13119.2 487.262  24
  -1   0 -11 13256.6 487.962   2
   1   0  12 20.0599 32.5200  21
  -1   0 -12 67.3972 39.2142   2
   1   0  12 32.3090 23.4143  34
  -1   0 -12 8.01787 35.4514  21
   1   0  12-5.10743 48.4171  24
   1   0  12 16.4825 28.6709  32
   1   0  12 19.7477 42.5201  25
   1   0  14 4726.31 215.282  21
   1   0  14 5181.58 217.793  24
   1   0  14 5145.76 211.717  32
  -1   0 -14 5447.43 218.145   2
   1   0  15 985.570 56.4604  32
   1   0  15 989.180 50.3440  13
   1   0  15 1027.06 47.7628   9
   1   0  15 1020.88 51.4965  11
   1   0  16 332.747 22.9547   8
   1   0  16 350.981 24.6130   4
   1   0  16 349.472 29.7293  13
   1   0  16 295.325 37.7736  32
  -1   0 -16 301.007 31.1889   7
   1   0  16 317.079 25.3258   9
   1   0  16 348.429 26.0701  19
   1   0  16 310.276 30.4922  11
   1   0  17 460.951 30.3626  19
   1   0  17 424.792 28.9275   4
  -1   0 -17 413.312 29.1707   6
   1   0  17 356.147 35.2536  11
   1   0  17 385.199 26.3447   8
  -1   0 -17 424.746 35.1421   7
   1   0  17 462.324 33.8859  13
   1   0  17 433.781 43.4731  32
   1   0  18 139.461 23.2561   4
  -1   0 -18 146.970 23.9667   6
  -1   0 -18 148.396 31.5237   7
   1   0  18 129.259 25.2682  19
   1   0  18 137.508 29.1381  13
   1   0  18 97.7525 31.3600  11
   1   0  18 190.572 40.8190  32
   1   0  19 1982.15 96.3077  32
   1   0  19 1977.53 91.1085  13
  -1   0 -19 2030.93 87.2793   6
   1   0  19 1987.87 92.4376  11
   1   0  19 2033.85 88.7566  19
   1   0  19 2103.98 87.6053   4
  -1   0 -19 1968.32 90.3452   7
   1   0  20 400.468 30.5780   4
  -1   0 -20 355.008 29.8185   6
   1   0  20 393.897 33.3018  19
   1   0  20 421.528 49.7068  32
  -1   0 -20 409.504 37.8978   7
   1   0  20 397.917 38.5051  13
   1   0  20 401.154 40.5597  11
   1   0  21 46.0436 29.7962  19
   1   0  21 57.3316 48.9365  32
   1   0  21 53.3816 35.3520  13
  -1   0 -21 49.4244 34.2647   7
   1   0  21 52.4223 44.7619  23
   1   0  21 55.2863 26.3959   4
  -1   0 -22 285.729 38.5007   7
   1   0  22 338.970 35.1591  19
   1   0  22 306.287 50.1942  23
   1   0  22 302.067 54.1926  32
   1   0  22 265.815 30.5965   4
   1   0  22 280.588 39.5890  13
   1   0  23 93.6894 39.0935  13
  -1   0 -23 94.5569 36.7863   7
   1   0  23 94.4984 47.0877  23
   1   0  23 133.591 28.8150   4
   1   0  23 84.5849 53.0725  32
   1   0  23 58.6570 33.3373  19
   1   0  24 384.222 32.1465   4
   1   0  24 320.867 55.1463  32
   1   0  24 321.544 41.7090  13
  -1   0 -24 274.943 39.2046   7
   1   0  24 333.302 37.6986  19
   1   0  24 280.239 48.9632  23
   1   0  25 162.617 39.7612  13
   1   0  25 159.844 35.2934  19
  -1   0 -25 140.628 35.7040   7
   1   0  25 125.686 45.5305  23
   1   0  25 151.068 28.1725   4
  -1   0 -26 114.316 34.6793   7
   1   0  26 135.430 44.6905  23
   1   0  26 139.824 38.7495  13
   1   0  26 158.920 34.9484  19
   1   0  27 14.4625 41.1107  23
   1   0  27 22.4944 36.1773  13
  -1   0 -27 52.4646 31.5733   7
   1   0  27-24.8295 33.2433  19
   1   0  28-52.5208 34.6018  13
   1   0  28-19.2855 31.3221  19
   1   0  28-3.12132 36.7606  23
   1   0  29 9.21723 33.3377  23
   1   0  29 2.42706 31.0183  13
   1   0  29-3.20880 29.0581  19
   1   0  30 1.89642 27.3766  19
  -1   0 -31 431.060 33.3230   3
   1   0  31 377.683 28.6877  19
   1   0  32 19.9668 21.3465  33
  -1   1  32 212.450 27.5086  12
  -1   1  32 133.922 25.4244  33
  -1   1  31 42.3721 29.4150  12
  -1   1  31 101.428 27.8261  33
  -1   1  30 74.8508 30.8662  33
  -1   1  30 17.0914 26.3524  19
   1   1 -30 26.7623 26.1350   7
  -1   1  30 32.6950 33.2119  12
  -1   1  29 131.361 30.2646  19
   1   1 -29 207.205 31.4620   7
  -1   1  29 188.847 37.5865  12
  -1   1  28 579.916 41.3855  19
  -1   1  28 657.488 47.6681  12
   1   1 -28 589.927 43.2257   7
   1   1 -27 95.3035 35.7721   7
  -1   1  27 122.303 32.8256  19
   1   1 -26 1120.29 59.8323   7
  -1   1  26 1017.77 56.6636  19
  -1   1  25 933.128 52.7019  19
   1   1 -25 929.338 56.5202   7
   1   1 -24 489.301 44.9770   7
  -1   1  24 402.674 45.9686  23
  -1   1  24 404.268 38.4175  19
   1   1 -23 162.948 40.4595   7
  -1   1  23 132.148 32.4682  19
   1   1 -23 166.351 28.3239   6
  -1   1  23 143.889 40.4238  23
  -1   1  23 131.043 49.7908  32
  -1   1  22 571.401 39.5717  19
  -1   1  22 541.330 47.7176  23
  -1   1  22 609.079 54.6693  32
   1   1 -22 655.041 46.4745   7
   1   1 -22 598.595 37.4143   6
  -1   1  22 514.918 45.0519  13
  -1   1  22 498.725 47.3498  11
  -1   1  21 770.399 50.9270  11
  -1   1  21 787.746 49.9589  13
  -1   1  21 777.553 52.1771  23
   1   1 -21 736.307 43.2062   6
   1   1 -21 838.599 50.1270   7
  -1   1  21 801.118 44.9004  19
  -1   1  21 827.176 57.6849  32
  -1   1  20 120.767 32.0528  13
  -1   1  20 147.746 37.5849  23
  -1   1  20 128.626 33.8021  11
   1   1 -20 209.064 27.0879   6
   1   1 -20 170.451 34.7666   7
  -1   1  20 159.449 27.4026  19
  -1   1  20 198.554 43.1306  32
  -1   1  19 919.022 46.9316  19
  -1   1  19 915.221 50.5395  13
   1   1 -19 874.052 46.5012   6
  -1   1  19 878.508 51.5547  11
  -1   1  19 1054.75 56.9597  32
  -1   1  18 545.133 38.5203  11
   1   1 -18 590.032 33.8206   6
  -1   1  18 592.106 34.1539  19
  -1   1  18 574.910 43.8084  32
  -1   1  18 511.153 37.5501  13
  -1   1  17 1340.15 65.9918  13
   1   1 -17 1384.68 63.7484   6
  -1   1  17 1339.34 66.6121  11
  -1   1  17 1597.67 69.9853  32
  -1   1  17 1534.69 64.2068  19
  -1   1  17 1425.80 67.4974  14
  -1   1  16 462.139 28.8038  19
  -1   1  16 424.141 32.6476  11
  -1   1  16 519.097 38.3326  32
  -1   1  16 411.577 31.3625  13
  -1   1  15 3073.27 128.151  32
   1   1 -15 2766.84 138.967  20
  -1   1  14 659.569 59.0953  24
   1   1 -14 603.082 52.5236  20
  -1   1  14 705.665 41.5106  32
  -1   1  13 1110.84 54.9855  32
   1   1 -13 1083.25 66.2238  20
  -1   1  13 1114.63 69.4798  24
  -1   1  12 8447.02 291.472  24
   1   1 -12 8203.96 294.509  20
  -1   1  12 8312.22 285.448  34
  -1   1  12 7998.30 286.004  32
  -1   1  11 5855.36 206.382  34
  -1   1  11 5701.04 213.238  24
  -1   1  11 4534.65 204.362   1
  -1   1  11 4772.54 204.848   1
   1   1 -11 5613.10 215.515  20
  -1   1  11 5748.52 207.076  32
  -1   1  10 1076.43 48.3030   1
   1   1 -10 971.159 63.3433  20
   1   1 -10 1242.24 63.5227  25
  -1   1  10 1369.37 67.0461  24
  -1   1  10 1255.38 49.1254   1
  -1   1   9 6041.80 249.388   1
  -1   1   9 5836.55 249.733   1
  -1   1   9 7261.46 256.575  24
   1   1  -9 7341.25 256.161  25
   1   1  -9 6886.33 258.019  20
   1   1  -8 707.534 49.5534  25
  -1   1   8 794.073 50.9350  24
   1   1  -8 771.677 45.0806  20
   1   1  -7 10170.9 409.962  25
  -1   1   7 10212.4 409.358  24
   1   1  -7 9868.15 410.189  20
   1   1  -7 9727.95 408.919  21
  -1   1   6 2507.66 108.333  24
   1   1  -6 2373.65 103.449  21
   1   1  -6 2514.04 109.956  25
   1   1  -5 2937.63 117.863  21
   1   1  -5 2828.86 124.387  25
  -1   1   5 2835.41 122.156  24
   1   1  -4 6546.70 275.050  21
  -1   1   4 6753.87 272.575  25
  -1   1   4 6903.09 276.450  24
   1   1  -4 6592.25 275.117  20
  -1   1   3 35147.1 1434.11  24
  -1   1   3 36525.0 1432.91  25
   1   1  -3 34172.3 1434.03  20
   1   1  -3 34417.6 1434.03  21
  -1   1   3 35508.9 1433.55   2
  -1   1   2 775.716 49.6235  24
   1   1  -2 753.550 38.3407  20
  -1   1   2 829.318 40.7875  25
  -1   1   2 813.818 37.9641   2
   1   1  -1 4809.68 199.030   2
   1   1  -1 5005.85 198.424  20
  -1   1   1 4816.05 197.738   2
  -1   1   1 4751.49 199.232  25
   1   1   0 187.142 21.6116   2
   1   1   0 207.557 18.5409  20
   1   1   1 3006.73 126.477   2
   1   1   1 3077.29 125.714   1
   1   1   2 5514.14 229.411   2
   1   1   2 5552.15 228.262   1
  -1   1  -2 5764.94 229.193  21
   1   1   3 98683.0 3969.53   1
  -1   1  -3 97514.0 3970.54  21
   1   1   3 97450.7 3970.72   2
   1   1   4 12555.2 526.023  24
   1   1   4 12626.6 525.044   2
  -1   1  -4 13525.9 524.616  21
   1   1   4 12821.5 522.830   1
  -1   1  -5 60687.4 2547.52  25
  -1   1  -5 62988.1 2547.01  21
   1   1   5 66175.0 2547.43   2
   1   1   5 58901.1 2547.33  24
   1   1   5 63893.0 2545.24   1
  -1   1  -6 65451.3 2520.85  25
   1   1   6 60993.3 2518.44   1
  -1   1  -6 61497.7 2520.43  21
   1   1   6 63351.7 2520.75  24
   1   1   7 2270.75 108.981  24
  -1   1  -7 2286.31 102.057  21
   1   1   7 2330.34 97.2084   1
  -1   1  -8 21233.2 862.573  21
   1   1   8 21757.7 863.057  24
   1   1   8 20993.8 859.811   1
  -1   1  -9 4730.93 210.151  21
   1   1   9 4836.38 213.147  24
   1   1   9 4800.64 207.520  25
   1   1   9 5308.36 205.787   1
   1   1  10 1949.40 84.7718  29
   1   1  10 2039.52 98.4741  24
   1   1  10 1951.49 83.8256   1
   1   1  10 2005.34 87.5276  25
  -1   1 -10 1939.69 90.2119  21
   1   1  10 1983.83 84.0195  34
   1   1  12 9222.57 372.907  29
   1   1  12 9759.07 379.773  24
   1   1  12 9200.35 373.490  25
   1   1  12 8798.25 372.310   1
   1   1  12 9187.94 373.089  32
  -1   1 -12 9023.60 377.969  21
   1   1  12 9195.61 372.570  34
  -1   1 -13 4647.66 185.364   2
   1   1  13 4539.56 178.521  34
   1   1  13 4271.70 178.956  29
   1   1  13 3993.19 179.460  32
  -1   1 -13 3988.22 185.405  21
   1   1  13 4435.66 190.244  24
   1   1  14 1404.39 67.0470  32
  -1   1 -14 1235.57 74.4407  21
  -1   1 -14 1435.13 73.2889   2
   1   1  14 1533.15 86.5726  24
   1   1  14 1398.70 65.8356  29
   1   1  15 2759.75 112.638  19
   1   1  15 2562.39 114.663  11
   1   1  15 2752.76 116.357  32
  -1   1 -15 2724.27 122.459   2
   1   1  15 2592.35 115.784  29
   1   1  16 1292.07 57.2407  19
   1   1  16 1241.95 64.0628  32
   1   1  16 1280.57 56.9169   4
   1   1  16 1148.42 60.0592  11
  -1   1 -16 1247.58 57.4891   6
  -1   1 -17 660.128 39.2452   6
   1   1  17 675.464 37.5761   4
   1   1  17 700.766 43.0528  11
  -1   1 -17 649.576 43.6168   7
   1   1  17 614.553 37.9994  19
   1   1  17 631.258 48.7877  32
  -1   1 -18 703.772 45.5789   7
   1   1  18 664.668 40.1517  19
  -1   1 -18 751.503 40.3300   6
   1   1  18 728.322 51.3142  32
   1   1  18 663.029 45.3807  11
   1   1  18 750.655 39.6546   4
  -1   1 -19 1638.84 77.1570   7
   1   1  19 1600.56 72.8144   4
   1   1  19 1622.11 73.6524  19
  -1   1 -19 1584.86 73.2160   6
   1   1  19 1693.32 82.2426  32
   1   1  20 197.542 45.9289  32
   1   1  20 152.086 29.1613  19
  -1   1 -20 138.296 37.4272   7
   1   1  20 153.498 27.5158   4
  -1   1 -20 159.943 28.9011   6
   1   1  21 88.3387 30.8149  19
   1   1  21 157.143 28.5526   4
  -1   1 -21 136.195 29.1494   6
  -1   1 -21 171.006 38.8557   7
   1   1  21 162.734 49.1429  32
   1   1  22 217.351 45.1440  23
   1   1  22 232.862 50.7438  32
  -1   1 -22 229.882 41.3223   7
   1   1  22 228.178 30.8391   4
   1   1  22 216.932 33.8980  19
  -1   1 -22 255.964 30.5335   6
   1   1  23 515.458 41.7251  19
  -1   1 -23 573.112 47.7178   7
   1   1  23 542.674 51.5827  23
   1   1  23 617.976 57.6132  32
   1   1  23 560.775 38.5476   4
  -1   1 -23 549.413 37.8565   6
  -1   1 -24 251.849 30.2605   6
   1   1  24 261.861 36.2557  19
   1   1  24 253.416 30.9365   4
   1   1  24 194.633 52.2673  32
   1   1  24 254.790 45.0875  23
  -1   1 -24 241.778 42.1554   7
  -1   1 -25 307.365 41.9062   7
   1   1  25 338.516 38.0823  19
   1   1  25 364.704 45.2152  23
  -1   1 -25 311.929 31.0587   6
   1   1  26 214.559 41.2255  23
  -1   1 -26 210.827 40.2916   7
   1   1  26 258.151 35.8925  19
   1   1  27 464.417 45.7316  12
   1   1  27 372.033 38.9033  19
  -1   1 -27 403.782 40.5965   7
   1   1  28 174.649 32.1072  19
   1   1  28 251.423 38.1550  12
  -1   1 -28 198.715 34.4706   7
   1   1  29 486.663 37.6563  19
  -1   1 -29 536.716 38.6181   7
  -1   1 -30-17.6736 25.7383   7
   1   1  30 41.1644 30.8259  12
   1   1  31 41.8818 25.2673  33
   1   1  31 71.3482 26.6063  12
   1   1  32 96.9613 23.2493  12
  -1   1 -32 122.937 24.8089   3
  -1   2  32 194.420 26.0182  12
   1   2 -31 840.259 41.2209   7
  -1   2  31 985.265 45.1585  12
  -1   2  30 166.821 33.5179  12
   1   2 -30 174.214 30.4953   7
  -1   2  30 143.469 29.0222  33
  -1   2  29 14.1475 35.3076  12
  -1   2  29 19.7035 33.8053  13
   1   2 -29-9.98086 32.7999   7
  -1   2  28 171.371 38.8408  13
   1   2 -28 211.021 37.7655   7
  -1   2  28 189.208 38.7773  12
  -1   2  27 158.589 40.2160  12
  -1   2  27 110.058 40.5765  13
   1   2 -27 214.858 40.9357   7
  -1   2  27 147.456 31.9785  19
  -1   2  26 174.558 33.1038  19
   1   2 -26 186.871 42.0834   7
   1   2 -26 168.260 28.9363   6
  -1   2  26 206.238 42.9404  12
  -1   2  26 193.400 40.8565  13
   1   2 -25 1127.61 56.4987   6
   1   2 -25 1158.17 65.7635   7
  -1   2  25 1054.58 58.6368  19
  -1   2  25 1290.44 64.7023  12
  -1   2  25 1062.52 64.1627  13
  -1   2  24 358.450 36.6261  19
   1   2 -24 367.026 35.4364   6
  -1   2  24 473.106 44.7360  12
   1   2 -24 376.564 46.5065   7
  -1   2  24 375.017 43.3672  13
  -1   2  23 846.039 56.4275  13
   1   2 -23 911.064 50.2892   6
   1   2 -23 880.019 58.3340   7
  -1   2  23 857.205 50.3844  19
   1   2 -22 1512.11 75.6558   7
   1   2 -22 1554.91 70.1308   6
  -1   2  22 1443.54 70.2364  19
  -1   2  22 1461.23 79.5095  32
  -1   2  22 1393.18 74.4892  13
  -1   2  21 367.357 40.5847  13
  -1   2  21 321.331 33.2297  19
   1   2 -21 400.490 35.7898   6
  -1   2  21 423.182 47.5546  32
  -1   2  20 1307.02 71.0564  32
  -1   2  20 1289.98 66.5851  13
   1   2 -20 1359.68 63.3410   6
  -1   2  20 1351.46 63.1117  19
  -1   2  20 1291.95 67.1547  11
   1   2 -19 130.269 27.6117   6
  -1   2  19 110.465 31.8556  11
  -1   2  19 129.870 39.3199  32
  -1   2  19 140.386 25.9631  19
  -1   2  19 130.591 31.2726  13
  -1   2  18 1284.95 62.6846  13
   1   2 -18 1274.49 59.7375   6
  -1   2  18 1336.22 65.9000  32
  -1   2  18 1207.46 62.6041  11
  -1   2  18 1292.00 59.0786  19
  -1   2  17 462.159 30.6291  19
  -1   2  17 553.930 40.9560  32
  -1   2  17 459.203 35.6987  11
   1   2 -17 453.275 32.0745   6
  -1   2  17 480.123 35.0874  13
  -1   2  16 168.616 32.7698  32
   1   2 -16 150.225 24.0137   6
  -1   2  16 141.083 27.0539  11
  -1   2  16 137.117 21.6049  19
  -1   2  16 171.474 26.5199  13
  -1   2  15 1048.45 53.1871  13
  -1   2  15 1127.57 56.8711  32
   1   2 -15 1129.15 68.2109  20
  -1   2  15 1120.97 53.6291  11
  -1   2  14 6687.54 279.483  34
   1   2 -14 6995.20 288.853  20
  -1   2  14 6911.19 280.021  32
  -1   2  13 3380.13 142.992  32
  -1   2  13 3348.93 154.774  24
  -1   2  13 3464.26 142.513  34
   1   2 -13 3398.11 151.960  20
   1   2 -13 3385.48 151.326  25
  -1   2  12 2531.42 106.954  32
  -1   2  12 2459.20 120.554  24
   1   2 -12 2441.27 115.408  21
   1   2 -12 2506.53 116.101  20
   1   2 -12 2239.04 116.788  25
  -1   2  12 2611.29 106.284  34
  -1   2  11 443.749 61.9056  24
   1   2 -11 392.409 44.3853  20
   1   2 -11 519.226 47.3823  21
  -1   2  11 451.615 29.8582  34
   1   2 -11 481.289 53.8617  25
  -1   2  11 521.419 29.3426  30
  -1   2  11 428.914 31.4517  29
  -1   2  11 415.183 33.1432  32
  -1   2  10 978.019 69.8458  24
   1   2 -10 842.519 64.1381  25
   1   2 -10 957.919 58.5741  21
  -1   2  10 1030.84 45.2884  34
  -1   2  10 965.176 44.8792  30
   1   2 -10 802.941 56.9073  20
   1   2  -9 298.881 41.1973  21
   1   2  -9 309.354 39.1857  20
   1   2  -9 298.331 50.6835  25
  -1   2   9 331.748 58.1818  24
  -1   2   8 13672.9 564.973  25
   1   2  -8 14545.5 570.662  21
  -1   2   8 14210.1 571.190  24
   1   2  -8 14475.9 570.455  20
   1   2  -8 14392.7 571.475  25
   1   2  -7 8431.62 330.061  25
  -1   2   7 8055.69 329.650  24
   1   2  -7 7600.03 326.161  20
   1   2  -7 7870.99 326.984  21
  -1   2   7 7884.81 322.367  25
  -1   2   6 5092.12 221.688   2
  -1   2   6 5231.76 227.226  24
   1   2  -6 5340.20 227.235  25
   1   2  -6 5296.29 222.062  20
  -1   2   6 5571.69 219.926  25
  -1   2   5 337.028 38.0312   2
  -1   2   5 240.874 38.5824  25
  -1   2   5 325.323 64.9591  24
   1   2  -5 250.696 34.2927  20
   1   2  -4 2392.70 105.927  20
  -1   2   4 2504.56 108.770  25
  -1   2   4 2432.29 107.756   2
  -1   2   4 2474.73 120.317  24
  -1   2   3 47806.4 1910.58  25
  -1   2   3 46102.8 1910.32   2
   1   2  -3 47567.2 1910.41  20
  -1   2   3 47197.2 1912.17  24
   1   2  -2 903.205 61.9010   2
  -1   2   2 1067.51 55.0989   2
  -1   2   2 1035.30 65.1079  25
   1   2  -2 1135.09 54.2411  20
  -1   2   1 79577.4 3293.12   2
   1   2  -1 80759.9 3294.05   2
  -1   2   1 81691.2 3294.37  25
   1   2  -1 83612.8 3293.48  20
   1   2   0 7279.16 305.684  25
  -1   2   0 7399.66 305.060  25
   1   2   0 7359.32 302.332   2
  -1   2   0 7348.51 301.062   2
   1   2   1 73872.8 3086.48  25
  -1   2  -1 73563.1 3085.06   2
   1   2   1 73930.7 3085.67   2
  -1   2  -1 79140.0 3083.84  20
  -1   2  -2 7431.71 324.894   2
   1   2   2 7742.52 325.813   2
  -1   2  -2 8270.16 322.822  20
   1   2   2 7864.72 328.198  25
   1   2   3 5057.55 201.953   1
  -1   2  -3 4773.85 201.020  20
   1   2   3 4667.75 207.094  25
   1   2   3 5014.46 204.190   2
  -1   2  -4 8207.28 330.041  20
   1   2   4 8134.82 332.113   2
   1   2   4 8107.25 329.548   1
   1   2   4 7734.34 336.419  24
   1   2   4 7901.90 333.099  25
  -1   2  -5 21758.9 943.849  20
   1   2   5 23096.8 942.541   1
   1   2   5 22625.2 944.752  25
   1   2   5 23997.7 947.245  24
   1   2   5 25276.0 945.418   2
  -1   2  -5 23817.9 945.412  21
   1   2   6 38681.1 1605.14  24
   1   2   6 39690.5 1603.11  25
   1   2   6 39223.9 1603.86   2
  -1   2  -6 38838.6 1604.26  21
   1   2   6 39576.9 1601.28   1
  -1   2  -6 41288.8 1603.52  20
  -1   2  -6 38837.4 1604.90  25
   1   2   7 3594.81 162.059  24
   1   2   7 3453.14 154.182  25
  -1   2  -7 3400.58 153.065  20
   1   2   7 3521.22 148.734   1
   1   2   7 4096.49 155.302   2
  -1   2  -7 3785.09 159.452  25
  -1   2  -7 3804.52 155.135  21
   1   2   8 4717.88 186.719   2
  -1   2  -8 4563.75 187.119  21
  -1   2  -8 4327.75 185.653  20
   1   2   8 4468.99 192.157  24
  -1   2  -8 4486.97 189.540  25
   1   2   8 4325.65 180.396   1
   1   2   8 4361.14 184.971  25
   1   2   9 3422.15 152.407   1
  -1   2  -9 3337.01 159.613  20
   1   2   9 4126.63 167.770  24
  -1   2  -9 3862.33 164.553  25
  -1   2  -9 3959.73 161.204  21
   1   2   9 4074.35 153.875  30
   1   2   9 3605.91 157.820  25
   1   2   9 3954.80 154.298  34
   1   2  10 3830.91 156.181  25
   1   2  10 4211.94 154.125  34
   1   2  10 4026.62 154.135  29
   1   2  10 4257.86 153.701  30
   1   2  10 4169.07 167.772  24
  -1   2 -10 4050.53 160.957  20
  -1   2 -10 4118.00 163.627  25
  -1   2 -10 3968.08 161.342  21
   1   2  10 3990.49 154.284  32
   1   2  11 2050.14 84.8946  34
   1   2  11 1589.24 83.3029  25
   1   2  11 1811.01 84.9698  25
   1   2  11 2161.05 106.936  24
   1   2  11 1942.40 85.5193  29
  -1   2 -11 1890.97 94.9726  21
  -1   2 -11 1602.68 93.7057  20
   1   2  11 2426.10 84.4834  30
  -1   2 -12 1229.89 71.2195  20
   1   2  12 1352.31 61.9064  34
   1   2  12 1436.44 61.3580  30
   1   2  12 1313.38 63.0263  32
   1   2  12 1413.54 86.4253  24
  -1   2 -12 1282.77 72.1917  21
   1   2  12 1329.48 62.5821  29
   1   2  13 3528.88 142.892  29
  -1   2 -13 3086.50 151.249  21
   1   2  13 3661.92 158.110  24
  -1   2 -13 3105.42 151.251  20
   1   2  13 3635.86 142.080  30
   1   2  13 3250.36 142.777  34
   1   2  13 3256.46 143.228  32
   1   2  14 2224.16 94.5586  29
   1   2  14 2066.51 93.8749  34
   1   2  14 2107.90 93.2334  13
   1   2  14 2149.06 95.0696  32
  -1   2 -14 1997.42 103.412  20
   1   2  14 2280.41 93.2576  30
   1   2  15 908.376 51.0860  29
   1   2  15 894.636 45.7242  19
   1   2  15 905.953 49.8915  11
   1   2  15 975.350 48.5858  13
   1   2  15 916.916 52.3730  32
  -1   2 -15 976.530 46.6894   6
  -1   2 -15 867.125 61.0660  20
   1   2  15 1076.16 50.9113  34
   1   2  15 925.393 46.0903   4
   1   2  16 1157.55 61.0866  32
   1   2  16 1239.84 57.4308  13
   1   2  16 1145.98 54.5442  19
  -1   2 -16 1164.32 55.2198   6
   1   2  16 1068.65 58.7672  34
   1   2  16 1184.18 54.9927   4
   1   2  17 742.950 42.6238   4
   1   2  17 832.494 50.7854  32
  -1   2 -17 816.257 43.5618   6
   1   2  17 869.586 48.5234  34
   1   2  17 747.343 45.8561  13
   1   2  17 787.007 42.4614  19
  -1   2 -18 1016.89 51.2592   6
   1   2  18 989.520 50.4510  19
   1   2  18 1022.23 50.9107   4
   1   2  18 953.465 53.8102  13
   1   2  18 1016.31 58.9424  32
   1   2  19 92.5651 42.6884  32
  -1   2 -19 50.9620 30.6560   6
   1   2  19 56.2965 28.0093  19
  -1   2 -19 80.7328 37.9791   7
   1   2  19 83.0234 33.8826  13
   1   2  19 54.7481 28.3257   4
   1   2  20 804.857 48.1618  19
  -1   2 -20 880.960 49.2504   6
   1   2  20 937.228 58.9954  32
   1   2  20 851.783 53.0999  13
  -1   2 -20 904.405 55.3592   7
   1   2  20 896.127 47.8620   4
  -1   2 -21 1563.92 73.3542   6
   1   2  21 1473.29 77.2511  13
   1   2  21 1443.93 73.2672  19
  -1   2 -21 1619.54 79.0599   7
   1   2  22-0.84965 47.7008  32
  -1   2 -22 44.4902 43.8712   7
  -1   2 -22-23.2236 33.4072   6
   1   2  22 8.13514 32.6000  19
   1   2  22-30.2640 39.2731  13
   1   2  23 555.610 43.6797  19
   1   2  23 530.451 49.4130  13
   1   2  23 673.306 49.3376  12
   1   2  23 654.091 56.0555  32
  -1   2 -23 622.840 51.7585   7
  -1   2 -23 587.460 42.4048   6
   1   2  24 96.7990 40.7676  12
   1   2  24 105.979 40.8772  13
  -1   2 -24 86.4320 31.9542   6
   1   2  24 151.265 48.5126  32
  -1   2 -24 92.8839 43.5417   7
   1   2  24 92.4005 33.8614  19
   1   2  25 98.4399 41.1197  13
  -1   2 -25 63.7297 42.2556   7
   1   2  25 61.7624 40.9528  12
  -1   2 -25 60.7706 29.9443   6
   1   2  25 55.6990 33.3060  19
   1   2  26 231.690 41.6378  13
   1   2  26 216.338 34.7302  19
  -1   2 -26 237.087 30.8231   6
  -1   2 -26 288.826 42.8726   7
   1   2  26 260.641 42.3395  12
  -1   2 -27 116.956 26.7084   6
  -1   2 -27 172.932 39.8191   7
   1   2  27 152.562 40.1354  12
   1   2  28 40.4999 36.4369  12
  -1   2 -28 45.4161 35.2987   7
  -1   2 -29 30.4940 31.4830   7
   1   2  29-17.1774 33.4413  12
   1   2  30 55.8163 30.2913  12
   1   2  30 51.1302 26.2668  33
  -1   2 -30 63.4524 27.4002   7
  -1   2 -31 224.584 24.4241   7
   1   2  31 242.350 27.8010  12
   1   2  31 171.664 24.3131  33
  -1   3  31 41.8892 26.2557  12
   1   3 -31 20.3381 24.6086   7
   1   3 -30 28.4130 25.9426  31
   1   3 -30 55.6553 29.0829   7
  -1   3  30 13.3358 30.4203  12
   1   3 -29 454.129 38.7733   7
   1   3 -29 383.288 36.1104  31
  -1   3  29 470.619 39.4232  12
  -1   3  28 94.4772 30.1216  33
   1   3 -28 95.7586 24.8544   6
  -1   3  28 74.4248 35.8096  12
   1   3 -28 105.285 37.4358   7
   1   3 -27 493.844 46.9087   7
   1   3 -27 452.099 35.0778   6
  -1   3  27 527.609 45.0174  12
   1   3 -26 115.221 43.9921   7
  -1   3  26 108.371 38.0802  13
   1   3 -26 89.1279 30.8228   6
  -1   3  26 110.735 41.2187  12
   1   3 -25 87.0598 45.9178   7
  -1   3  25 42.5249 40.6888  12
  -1   3  25 49.0833 38.5794  13
   1   3 -25 72.4394 32.7959   6
  -1   3  24 58.2317 38.5443  13
   1   3 -24 27.3397 46.0639   7
   1   3 -24 84.2128 33.4594   6
  -1   3  24 43.0397 40.3348  12
  -1   3  23 390.705 45.8296  12
  -1   3  23 407.103 44.2464  13
   1   3 -23 358.500 49.9376   7
  -1   3  23 330.105 36.1930  19
   1   3 -23 384.164 39.9516   6
   1   3 -22 653.782 45.0743   6
   1   3 -22 715.971 54.2474   7
  -1   3  22 545.024 41.8786  19
  -1   3  22 729.485 49.8659  12
  -1   3  22 590.596 47.6873  13
  -1   3  21 638.693 48.5992  13
   1   3 -21 684.059 45.5194   6
  -1   3  21 796.446 49.7805  12
  -1   3  21 676.100 51.4789  32
  -1   3  21 636.120 42.4467  19
  -1   3  20 1863.84 90.0354  32
  -1   3  20 2065.33 88.6866  12
  -1   3  20 1790.92 84.4679  19
   1   3 -20 2033.57 85.9978   6
  -1   3  20 1728.81 87.8747  13
  -1   3  19 398.864 39.2865  13
  -1   3  19 433.903 43.4926  32
  -1   3  19 432.589 33.9554  19
  -1   3  19 427.619 39.8726  12
   1   3 -19 486.905 37.0690   6
  -1   3  18 1014.52 54.2584  32
   1   3 -18 913.914 49.6924   6
  -1   3  18 1027.26 52.3455  12
  -1   3  18 880.581 47.9295  19
  -1   3  18 896.214 51.4194  13
  -1   3  17 623.998 41.6284  32
  -1   3  17 580.880 39.7271  13
   1   3 -17 569.841 37.3276   6
  -1   3  17 550.091 35.2469  19
  -1   3  17 590.475 40.7693  12
  -1   3  16 395.903 33.8341  12
  -1   3  16 332.910 31.8543  13
   1   3 -16 342.583 30.2872   6
  -1   3  16 294.233 27.0933  19
  -1   3  16 399.770 35.4427  32
  -1   3  15 462.434 34.1206  34
  -1   3  15 492.042 34.7097  12
  -1   3  15 455.205 34.9323  32
  -1   3  15 376.837 28.8393  19
  -1   3  15 399.870 32.5600  13
  -1   3  15 387.346 31.3223  11
   1   3 -15 396.568 31.3709   6
  -1   3  14 2275.88 97.9178  34
  -1   3  14 2229.95 97.8075  13
  -1   3  14 2345.86 98.3747  32
   1   3 -14 2062.63 110.402  25
   1   3 -14 2201.74 107.150  20
   1   3 -14 2180.61 97.0146   6
  -1   3  14 2419.50 98.3560  12
  -1   3  12 881.760 77.4656  24
   1   3 -12 879.342 68.9144  25
  -1   3  12 950.146 46.9751  34
   1   3 -12 941.111 57.3347  20
  -1   3  12 1000.30 46.3108  30
   1   3 -11 413.065 41.1337  20
  -1   3  11 450.610 67.1705  24
  -1   3  11 427.906 29.6727  34
  -1   3  11 453.472 29.5564  30
   1   3 -11 369.347 57.4334  25
   1   3 -10 2505.02 117.775  25
  -1   3  10 2623.13 99.7906  30
  -1   3  10 2667.70 100.045  29
  -1   3  10 2560.01 100.004  34
  -1   3  10 2758.96 121.671  24
   1   3 -10 2616.69 107.902  20
  -1   3   9 1892.48 103.438  24
  -1   3   9 1798.84 76.1611  30
   1   3  -9 1675.19 84.2048  20
  -1   3   9 1821.18 76.5145  34
  -1   3   9 1718.88 77.7637  25
   1   3  -9 1786.97 97.7381  25
   1   3  -8 1950.92 92.2818  20
   1   3  -8 2078.26 104.343  25
  -1   3   8 1974.40 85.4582  31
  -1   3   8 2248.61 94.3149   2
  -1   3   8 1988.43 90.1010  25
  -1   3   8 2091.00 110.180  24
  -1   3   7 17419.8 717.013  25
   1   3  -7 17327.0 718.550  20
   1   3  -7 17418.8 722.567  25
  -1   3   7 17746.9 722.294  24
  -1   3   7 18249.8 718.855   2
   1   3  -6 2718.11 117.564  20
  -1   3   6 2716.56 119.873  25
  -1   3   6 2705.47 132.833  24
  -1   3   6 2693.82 119.267   2
   1   3  -5 5122.91 212.460  20
  -1   3   5 5106.32 214.719  25
  -1   3   5 5188.42 213.513   2
  -1   3   5 4845.27 222.310  24
  -1   3   4 597.471 52.9348  25
   1   3  -4 482.445 48.4980   2
   1   3  -4 685.491 59.9785  25
  -1   3   4 588.752 44.5751   2
   1   3  -4 622.573 38.3008  20
   1   3  -3 509.015 57.0178  25
  -1   3   3 504.485 41.1077   2
  -1   3   3 496.196 52.8028  25
   1   3  -3 456.170 45.9940   2
   1   3  -3 514.722 36.2510  20
   1   3  -2 12.1328 39.3475   2
  -1   3   2 17.9703 51.2005  25
   1   3  -2-25.5207 51.6555  25
   1   3  -2-4.97569 26.5449  20
  -1   3   2-12.9062 32.5642   2
   1   3  -1 815.831 55.7381   2
  -1   3   1 862.073 51.1640   2
   1   3  -1 950.328 68.3796  25
  -1   3   1 919.871 64.6817  25
   1   3   0 97.7149 37.3512   2
  -1   3   0 86.2454 34.6451   2
   1   3   0 57.1799 54.8402  25
  -1   3   0 76.9686 51.3622  25
   1   3   1 226.966 61.0672  24
  -1   3  -1 257.419 53.8346  25
   1   3   1 200.353 38.6513   2
  -1   3  -1 218.067 35.6638   2
   1   3   1 229.323 55.8787  25
  -1   3  -2 674.905 47.3807   2
   1   3   2 694.883 61.3926  25
  -1   3  -2 714.150 57.9055  25
   1   3   2 731.016 49.1060   2
   1   3   2 584.969 69.0522  24
   1   3   3 1870.98 108.720  24
   1   3   3 1930.77 91.3619   2
   1   3   3 1887.73 98.8074  25
  -1   3  -3 2055.46 85.1592  20
  -1   3  -3 1848.54 97.8868  25
  -1   3  -3 2025.87 91.0463   2
  -1   3  -4 846.831 61.8706  25
  -1   3  -4 840.348 52.2213   2
   1   3   4 810.023 51.2320   2
   1   3   4 774.993 76.8382  24
   1   3   4 767.526 62.4773  25
  -1   3  -4 873.435 42.7612  20
   1   3   5 360.822 71.0033  24
  -1   3  -5 406.726 32.0212  20
   1   3   5 430.767 53.3164  25
   1   3   5 516.214 43.1612   2
   1   3   6 2221.96 95.1899   2
  -1   3  -6 2087.47 89.8304  20
   1   3   6 1954.71 98.2734  25
   1   3   6 1971.33 86.2019  31
   1   3   6 2074.28 110.757  24
   1   3   7 6152.43 265.099  24
   1   3   7 6509.79 257.993   2
  -1   3  -7 6473.68 262.185  25
   1   3   7 5996.00 252.023  31
   1   3   7 5721.97 257.713  25
  -1   3  -7 6251.66 255.399  20
   1   3   7 6280.47 251.916  30
   1   3   8 6144.73 252.685  30
   1   3   8 5967.73 257.775  25
   1   3   8 6224.18 252.933  34
  -1   3  -8 6347.85 256.864  20
  -1   3  -8 6160.97 262.709  25
   1   3   8 6413.88 258.941   2
   1   3   8 6310.34 265.677  24
   1   3   8 6115.69 252.691  31
  -1   3  -9 496.776 40.6456  20
   1   3   9 604.487 34.7506  34
   1   3   9 663.190 48.8371   2
   1   3   9 602.243 34.1427  29
   1   3   9 615.880 33.6756  30
   1   3   9 558.635 75.2013  24
   1   3   9 590.755 34.3395  31
   1   3   9 564.860 48.8565  25
  -1   3  -9 506.499 59.9070  25
  -1   3 -10 1931.74 104.135  25
   1   3  10 2130.66 89.1108  29
   1   3  10 2087.34 89.3805  34
  -1   3 -10 1808.81 95.2550  20
   1   3  10 2146.10 88.7069  30
   1   3  10 2061.00 113.206  24
   1   3  11 85.0163 26.1589  34
  -1   3 -11 36.6995 32.3691  20
   1   3  11 86.2927 24.4937  30
   1   3  11 20.7821 67.1421  24
   1   3  11 62.7677 25.4585  32
  -1   3 -11 77.6387 52.3616  25
   1   3  11 64.1625 25.8733  29
   1   3  12 1730.64 102.100  24
  -1   3 -12 1535.99 88.0327  21
   1   3  12 1895.96 76.6151  30
   1   3  12 1694.73 77.5039  34
   1   3  12 1799.45 77.1613  29
   1   3  12 1661.41 76.9212  32
  -1   3 -12 1612.32 84.2464  20
   1   3  13 211.495 73.3078  24
  -1   3 -13 115.327 38.6514  20
   1   3  14 4019.20 164.192  12
  -1   3 -14 3800.95 163.239   6
   1   3  14 3946.80 164.405  32
   1   3  14 3947.72 164.053  30
   1   3  14 4023.34 164.263  13
   1   3  14 3681.32 162.892  19
   1   3  14 4109.01 164.728  29
   1   3  14 4019.96 164.709  34
   1   3  15 2036.18 88.2630  12
   1   3  15 2113.27 89.8704  34
   1   3  15 1984.34 89.5987  32
  -1   3 -15 2038.90 87.3870   6
   1   3  15 1723.07 86.1545  19
   1   3  15 2124.56 88.7950  30
   1   3  15 1921.58 88.6085  13
   1   3  15 1961.08 89.5847  29
   1   3  16 3871.10 158.719  34
   1   3  16 3817.54 158.696  32
   1   3  16 3787.64 157.904  12
   1   3  16 3841.11 158.125  13
  -1   3 -16 3823.70 156.797   6
   1   3  16 3455.19 156.279  19
   1   3  17 1266.87 63.9232  19
   1   3  17 1333.70 66.8567  13
   1   3  17 1370.36 66.5083  12
   1   3  17 1495.08 69.7663  32
  -1   3 -17 1370.30 65.0810   6
   1   3  17 1489.29 68.2107  34
   1   3  18 1388.96 67.2144  19
   1   3  18 1420.59 70.4137  13
   1   3  18 1444.05 70.0645  12
  -1   3 -18 1488.49 68.4215   6
   1   3  18 1445.12 73.2267  32
   1   3  19 368.302 39.4760  13
   1   3  19 360.171 39.4656  12
   1   3  19 339.700 33.4384  19
   1   3  19 400.352 45.4856  32
  -1   3 -19 368.698 37.1116   6
   1   3  20 1257.91 69.3582  13
   1   3  20 1422.18 73.1712  32
   1   3  20 1201.67 65.1836  19
  -1   3 -20 1432.42 67.5639   6
   1   3  20 1438.48 69.5747  12
   1   3  21 575.333 47.0917  13
   1   3  21 620.821 52.9303  32
   1   3  21 499.606 41.9080  19
   1   3  21 552.873 47.2764  12
  -1   3 -21 602.185 44.6707   6
   1   3  22 2517.27 116.253  13
   1   3  22 2692.36 118.700  32
   1   3  22 2308.05 112.898  19
   1   3  22 2624.74 116.260  12
  -1   3 -22 2681.36 113.701   6
  -1   3 -22 2761.45 118.571   7
   1   3  23 760.815 54.1227  12
   1   3  23 802.991 57.3952  32
   1   3  23 733.297 54.1015  13
  -1   3 -23 813.463 49.4925   6
  -1   3 -23 884.295 59.1315   7
   1   3  24 665.289 50.4896  12
  -1   3 -24 605.481 43.0821   6
  -1   3 -24 598.477 53.8721   7
   1   3  24 576.522 48.6696  13
  -1   3 -25 26.8439 31.6173   6
   1   3  25 33.2018 40.9910  12
  -1   3 -25-0.63585 44.1218   7
  -1   3 -26 25.2154 42.4781   7
  -1   3 -26-2.74091 29.4693   6
   1   3  26 65.5575 40.1826  12
  -1   3 -27 33.5444 39.4987   7
   1   3  27 9.28882 37.1624  12
  -1   3 -27 4.05665 27.0006   6
   1   3  28 345.749 37.7447  12
  -1   3 -28 282.378 38.4143   7
  -1   3 -28 264.503 27.2409   6
  -1   3 -29 235.931 33.7685   7
   1   3  29 228.605 33.4324  12
  -1   3 -30 108.456 27.7295   7
   1   3  30 141.745 28.2443  12
  -1   3 -31 137.433 23.0636   7
   1   3  31 97.3149 24.1812  12
   1   4 -30 61.5196 27.9205   7
  -1   4  30 109.231 26.8554  12
  -1   4  29 393.161 35.2731  12
   1   4 -29 391.265 35.6914   7
   1   4 -29 324.472 26.1337   6
   1   4 -28 231.898 27.8500   6
  -1   4  28 335.968 37.2393  12
   1   4 -28 260.534 31.2979  31
   1   4 -28 315.751 38.6734   7
   1   4 -27 404.557 33.8252   6
   1   4 -27 431.621 45.3717   7
  -1   4  27 448.549 41.3674  12
   1   4 -27 336.614 36.6601  31
   1   4 -26 90.9099 31.4125   6
   1   4 -26 151.790 44.5397   7
   1   4 -26 73.6404 33.8859  31
  -1   4  26 88.8895 39.0633  12
  -1   4  25 1032.00 59.1314  12
   1   4 -25 963.647 53.4450   6
   1   4 -25 870.216 55.1808  31
  -1   4  24 248.436 42.7473  12
   1   4 -24 268.868 38.2704   6
  -1   4  23 1267.60 71.2382  13
   1   4 -23 1473.26 70.1456   6
  -1   4  23 1442.61 74.0753  12
   1   4 -22 2740.79 112.251   6
  -1   4  22 2741.18 115.170  12
  -1   4  22 2437.38 113.288  13
   1   4 -22 2300.60 110.018  22
  -1   4  21 481.134 46.9143  12
   1   4 -21 449.048 38.9201  22
  -1   4  21 445.501 42.8594  13
   1   4 -21 512.977 42.6250   6
   1   4 -20 1236.65 64.3617   6
  -1   4  20 1212.09 64.9569  13
  -1   4  20 1285.13 67.3587  12
  -1   4  19 575.683 44.8060  13
   1   4 -19 664.098 45.1602   6
  -1   4  19 673.438 48.8056  12
  -1   4  18 1912.45 85.6732  12
  -1   4  18 1736.74 83.5880  13
   1   4 -18 1808.22 83.2597   6
   1   4 -17 120.497 30.9914   6
  -1   4  17 95.1145 30.7032  13
  -1   4  17 102.250 36.5192  12
  -1   4  16 181.324 30.0745  13
  -1   4  16 225.041 34.9500  12
   1   4 -16 226.157 31.4742   6
  -1   4  15 289.831 34.4029  12
   1   4 -15 384.487 32.8323   6
  -1   4  15 325.565 32.2473  34
  -1   4  15 341.789 31.2018  13
   1   4 -14 208.045 32.6810   5
  -1   4  14 278.059 28.4411  13
  -1   4  14 296.747 29.8557  34
  -1   4  14 264.972 30.7884  12
  -1   4  13 2881.67 127.499  13
   1   4 -13 2880.43 128.367   5
  -1   4  13 3013.34 128.213  12
  -1   4  13 3122.63 127.625  34
  -1   4  13 3184.16 127.397  30
  -1   4  12 3151.35 130.382  34
  -1   4  12 3205.54 130.297  30
  -1   4  12 2973.78 130.809  12
   1   4 -12 3081.71 131.386   5
  -1   4  11 2322.88 101.209  12
  -1   4  11 2204.41 125.189  24
  -1   4  11 2388.10 100.573  34
   1   4 -11 2282.83 119.048  25
   1   4 -11 2306.84 100.579   6
  -1   4  11 2451.76 100.344  30
   1   4 -10 3479.75 167.272  25
  -1   4  10 3594.22 171.509  24
   1   4 -10 3687.90 158.270  20
  -1   4  10 3704.09 151.306  30
  -1   4  10 3626.72 151.351  34
  -1   4   9 4183.66 176.119  34
   1   4  -9 4398.66 182.589  20
  -1   4   9 4179.55 176.048  30
  -1   4   9 4349.45 194.848  24
  -1   4   9 4575.57 184.431   2
   1   4  -9 4144.29 192.200  25
  -1   4   9 4403.86 176.663  31
   1   4  -9 4252.13 177.613  31
  -1   4   8 378.534 26.1288  30
  -1   4   8 392.885 29.2025  31
  -1   4   8 368.820 25.9263  34
  -1   4   8 349.522 43.5161   2
   1   4  -8 314.863 32.5214  31
  -1   4   8 406.322 43.7306  25
   1   4  -8 389.204 36.9933  20
   1   4  -8 451.887 65.6675  25
   1   4  -7 1055.91 59.1904  20
   1   4  -7 1067.99 54.9699  31
  -1   4   7 1059.65 51.1732  30
  -1   4   7 1179.84 66.6575  25
  -1   4   7 1320.85 65.7823   2
   1   4  -7 1126.67 54.4381  22
   1   4  -7 1187.21 69.2667   2
  -1   4   7 1240.12 53.5460  31
  -1   4   6 347.647 42.4679   2
   1   4  -6 306.459 30.2824  31
   1   4  -6 351.807 34.5749  20
  -1   4   6 341.744 27.2147  31
   1   4  -6 347.557 48.0703   2
   1   4  -6 284.205 29.0315  22
  -1   4   6 289.142 49.3392  25
  -1   4   5 244.456 50.6159  25
   1   4  -5 286.601 28.8726  31
  -1   4   5 339.779 41.6208   2
  -1   4   5 260.119 23.8040  22
   1   4  -5 271.351 64.0118  25
  -1   4   5 276.394 25.9269  31
   1   4  -5 264.562 27.6537  27
   1   4  -5 278.449 33.8419  20
   1   4  -5 256.492 48.1585   2
  -1   4   4 717.810 36.7578  22
  -1   4   4 711.634 60.3721  25
  -1   4   4 711.758 49.1602   2
   1   4  -4 694.108 38.5814  27
   1   4  -4 634.294 54.0544   2
   1   4  -4 690.675 43.1432  20
  -1   4   4 739.108 37.4045  31
   1   4  -4 717.108 39.5739  31
   1   4  -4 684.638 70.4092  25
   1   4  -3 4041.11 177.873  25
   1   4  -3 3617.32 170.011   2
   1   4  -3 4038.03 166.554  20
   1   4  -3 3994.59 163.002  31
  -1   4   3 4119.37 173.733  25
  -1   4   3 3908.98 168.224   2
  -1   4   3 3900.32 162.401  22
  -1   4   2 454.822 29.1775  22
  -1   4   2 490.013 43.0300   2
   1   4  -2 454.371 31.4281  31
   1   4  -2 453.810 46.5403   2
   1   4  -2 472.664 30.8109  22
  -1   4   2 455.074 58.1136  25
   1   4  -2 496.685 64.1353  25
   1   4  -1 372.535 63.0247  25
   1   4  -1 394.235 28.1744  22
   1   4  -1 364.732 45.9717   2
  -1   4   1 367.798 58.8080  25
  -1   4   1 380.792 27.4426  22
   1   4  -1 370.887 28.8998  31
  -1   4   1 447.542 40.7864   2
   1   4   0 389.725 28.9580  31
  -1   4   0 395.781 60.0560  25
   1   4   0 409.033 63.5411  25
   1   4   0 395.363 27.5562  22
  -1   4   0 379.494 40.7418   2
   1   4   0 393.958 46.9275   2
  -1   4   0 412.904 28.1021  22
   1   4   1 1977.59 86.4136  31
   1   4   1 2129.10 106.787  25
  -1   4  -1 2103.65 94.2940   2
  -1   4  -1 2018.43 86.4486  22
  -1   4  -1 2069.67 105.248  25
   1   4   1 2017.37 86.0657  22
   1   4   1 1989.74 95.8088   2
   1   4   2 333.047 59.7436  25
  -1   4  -2 278.489 26.7928  22
  -1   4  -2 360.911 41.2698   2
   1   4   2 321.105 25.8890  22
  -1   4  -2 331.837 60.4584  25
   1   4   2 355.159 27.1892  31
   1   4   2 331.597 43.1751   2
   1   4   3 6833.47 294.315  24
   1   4   3 6681.12 278.361  31
  -1   4  -3 6859.43 289.431  25
  -1   4  -3 6749.03 278.703  22
   1   4   3 6827.89 278.285  22
   1   4   3 7100.50 284.829   2
  -1   4  -3 6992.04 283.982   2
   1   4   3 6914.38 288.745  25
  -1   4  -4 6218.16 243.180  20
   1   4   4 5869.63 258.714  24
   1   4   4 5752.05 248.040   2
   1   4   4 6057.61 241.620  22
   1   4   4 5945.81 251.657  25
  -1   4  -4 5877.81 247.743   2
  -1   4  -4 5830.27 253.363  25
   1   4   4 5609.92 241.730  31
   1   4   5 558.727 62.5773  25
   1   4   5 672.094 50.6677   2
   1   4   5 555.851 35.4391  31
   1   4   5 497.390 80.7954  24
  -1   4  -5 632.340 36.5353  20
   1   4   5 620.594 33.4973  30
  -1   4  -5 542.828 50.2445   2
  -1   4  -5 599.296 64.2400  25
  -1   4  -6 2970.25 124.565  31
  -1   4  -6 2946.23 132.639   2
  -1   4  -6 3253.22 127.045  20
   1   4   6 2884.97 124.422  31
   1   4   6 2943.72 123.854  30
   1   4   6 2981.79 148.520  24
   1   4   6 2969.41 123.777  34
   1   4   6 2979.47 132.780   2
   1   4   6 2872.85 136.046  25
   1   4   7 2729.06 120.901   2
   1   4   7 2707.96 111.582  31
  -1   4  -7 2784.20 121.644   2
   1   4   7 2652.60 138.463  24
   1   4   7 2496.85 123.016  25
  -1   4  -7 2601.44 111.761  31
   1   4   7 2573.28 110.990  30
  -1   4  -7 2731.56 114.454  20
   1   4   7 2611.87 110.801  34
  -1   4  -8 2480.08 123.428  25
   1   4   8 2466.62 133.137  24
   1   4   8 2496.36 115.145   2
  -1   4  -8 2450.21 106.494  31
   1   4   8 2498.40 105.804  34
   1   4   8 2526.26 106.344  31
   1   4   8 2565.74 115.998  25
   1   4   8 2456.20 105.608  30
  -1   4  -8 2663.97 109.878  20
   1   4   9 1433.12 76.0231   2
   1   4   9 1399.47 64.0092  34
  -1   4  -9 1278.06 85.4966  25
   1   4   9 1391.49 98.5500  24
  -1   4  -9 1426.18 64.8502  31
   1   4   9 1410.80 63.7803  30
   1   4   9 1464.99 64.3056  31
   1   4  10 1498.19 80.6911   2
   1   4  10 1690.86 69.9273  31
  -1   4 -10 1600.75 90.6092  25
   1   4  10 1713.38 69.3347  30
   1   4  10 1394.58 69.4939  12
   1   4  10 1602.48 69.6294  34
   1   4  10 1468.66 103.040  24
  -1   4 -10 1419.27 68.7112   6
   1   4  11 5221.45 207.361  30
   1   4  11 4890.85 225.953  24
   1   4  11 5279.29 207.562  34
   1   4  11 4894.23 206.962  29
   1   4  11 4898.83 207.362  13
  -1   4 -11 4926.92 206.821   6
   1   4  11 4784.54 207.485  12
  -1   4 -11 5236.21 207.773   5
   1   4  12 3010.87 128.095  12
  -1   4 -12 2980.84 127.214   6
  -1   4 -12 3121.61 128.594   5
   1   4  12 3021.14 128.089  34
   1   4  12 2985.12 127.536  29
   1   4  12 2922.10 127.711  13
   1   4  12 3142.61 127.697  30
   1   4  13 235.285 31.9148  34
   1   4  13 196.104 30.7419  29
   1   4  13 170.652 29.6908  13
   1   4  13 207.233 32.4511  12
   1   4  14 2225.16 101.181  13
   1   4  14 2372.15 101.878  34
   1   4  14 2391.39 101.118  30
   1   4  14 2284.80 102.272  12
   1   4  14 2334.15 101.452  29
   1   4  15 365.463 36.1663  34
   1   4  15 400.713 34.1850  30
   1   4  15 321.664 33.3367  13
   1   4  15 314.351 36.2283  12
   1   4  16 289.381 36.6873  12
   1   4  16 293.916 34.0145  13
   1   4  16 300.452 36.3692  34
  -1   4 -17 91.8281 34.3162   6
   1   4  17 107.490 33.9049  13
   1   4  17 93.5553 35.7942  12
   1   4  17 94.9107 36.1787  34
   1   4  18 506.001 43.3447  12
   1   4  18 446.910 41.2028  13
  -1   4 -18 449.000 41.0640   6
  -1   4 -19 2104.60 94.3259   7
   1   4  19 1800.47 90.6575  13
   1   4  19 1890.22 91.8010  12
  -1   4 -19 2011.03 90.3627   6
  -1   4 -20 304.223 48.1429   7
   1   4  20 189.783 41.1617  32
   1   4  20 197.364 42.2789  12
  -1   4 -20 232.718 39.6237   6
  -1   4 -21 136.015 39.8862   6
   1   4  21 179.853 42.5363  12
   1   4  22 511.030 48.2625  12
  -1   4 -22 482.267 45.1383   6
   1   4  23 614.527 48.7431  12
  -1   4 -23 526.794 45.6126   6
  -1   4 -23 503.876 41.0304  22
  -1   4 -24 256.268 36.9562   6
   1   4  24 275.771 44.6879  12
  -1   4 -24 214.937 35.6803  31
  -1   4 -25 133.745 33.2857   6
   1   4  25 167.636 41.7287  12
  -1   4 -26 195.863 31.7343   6
   1   4  26 174.692 39.3495  12
  -1   4 -27 442.481 34.0327   6
  -1   4 -27 486.341 44.7344   7
   1   4  27 452.349 41.5831  12
   1   4  28 84.1244 32.6483  12
  -1   4 -28 113.465 34.2728   7
  -1   4 -28 63.0433 23.9437   6
   1   4  29 565.288 37.3241  12
  -1   4 -29 638.903 38.0954   7
   1   4  30 134.363 25.2341  12
  -1   4 -30 130.469 25.5743   7
   1   5 -29 82.8167 18.9768   6
  -1   5  29 76.6994 26.0500  12
   1   5 -28 25.6154 22.8747   6
  -1   5  28 17.3172 29.1530  12
   1   5 -27 364.429 31.4895   6
  -1   5  27 346.643 37.1236  12
  -1   5  26 290.348 38.7038  12
   1   5 -26 239.569 32.7682   6
   1   5 -25 358.240 36.5402   6
  -1   5  25 389.847 42.7381  12
  -1   5  24 348.503 43.5014  12
   1   5 -24 391.180 50.4980   7
   1   5 -24 339.326 41.1595   6
   1   5 -24 272.346 37.3827  31
   1   5 -23 1287.90 71.4035   7
  -1   5  23 1153.15 67.1962  12
   1   5 -23 1088.30 62.5152  31
   1   5 -23 1239.66 64.2685   6
  -1   5  22 1060.64 64.9014  12
   1   5 -22 1034.29 60.2440  31
   1   5 -22 1222.74 61.4590   6
   1   5 -22 971.038 56.6195  22
   1   5 -22 1217.96 68.8193   7
   1   5 -21 223.627 40.5701   6
   1   5 -21 211.843 35.4350  22
   1   5 -21 192.233 39.7918  31
  -1   5  21 188.731 43.9090  12
   1   5 -20 216.315 36.2210  22
  -1   5  20 253.240 44.5519  12
   1   5 -20 267.423 41.5950  31
   1   5 -20 257.329 39.8909   6
   1   5 -19 462.779 46.4579  31
  -1   5  19 518.112 49.5086  12
   1   5 -19 479.862 43.5734   6
   1   5 -19 446.130 41.2508  22
   1   5 -18 616.586 50.4684  31
   1   5 -18 685.320 46.7167  22
  -1   5  18 625.053 52.8804  12
  -1   5  17 1532.17 77.2367  12
   1   5 -17 1516.31 77.4093  31
   1   5 -17 1501.24 74.0712  22
   1   5 -16 317.020 44.4860  31
   1   5 -16 397.144 39.0238  22
  -1   5  16 342.820 41.0498  12
  -1   5  15 700.221 48.3459  12
   1   5 -15 829.051 48.9159  22
   1   5 -15 693.636 50.7512  31
   1   5 -15 757.838 49.9018   5
   1   5 -14 1711.02 79.8915  22
  -1   5  14 1648.53 79.5034  12
   1   5 -14 1649.63 80.7467  31
  -1   5  14 1821.09 77.0364  34
   1   5 -14 1707.63 80.6424   5
   1   5 -14 1680.62 78.5044   6
   1   5 -13 1086.68 57.3152   5
   1   5 -13 1114.95 53.7861   6
   1   5 -13 1060.39 55.6445  22
  -1   5  13 1054.85 52.0954  30
  -1   5  13 1097.01 52.2759  34
  -1   5  13 1074.48 54.5754  12
   1   5 -13 907.517 50.4721  16
   1   5 -13 1057.09 57.0539  31
   1   5 -12 662.419 43.1095  22
  -1   5  12 672.795 41.7928  12
   1   5 -12 626.975 44.5070  31
   1   5 -12 581.605 37.9426  16
   1   5 -12 633.056 46.0453   5
  -1   5  12 774.084 38.8139  30
   1   5 -12 651.266 40.8064   6
  -1   5  12 735.035 38.3277  34
  -1   5  11 4533.33 186.508  34
   1   5 -11 4366.52 187.130   6
   1   5 -11 4625.30 188.601   5
  -1   5  11 4399.69 187.989  12
   1   5 -11 4417.43 188.501  22
   1   5 -11 4514.84 188.299  31
  -1   5  11 4690.51 186.745  30
  -1   5  10 2004.81 83.7146  30
   1   5 -10 1973.13 87.2373  31
  -1   5  10 1897.37 86.0005  12
   1   5 -10 1890.91 87.8613   5
   1   5 -10 1941.35 86.8134  22
   1   5 -10 1906.19 85.0996   6
   1   5  -9 8233.09 344.302  26
  -1   5   9 7933.88 345.173  12
   1   5  -9 8246.65 345.313  31
  -1   5   9 8519.81 343.987  30
   1   5  -9 8323.30 344.424   6
  -1   5   9 9139.99 344.673  31
   1   5  -9 8332.87 344.947  27
   1   5  -9 8658.23 345.617  22
   1   5  -9 8429.69 355.150   2
  -1   5   8 2066.20 90.0339  30
   1   5  -8 2174.71 93.3096  22
   1   5  -8 2114.29 91.5074   6
   1   5  -8 2199.50 92.7306  27
  -1   5   8 2200.79 100.964   2
  -1   5   8 2217.68 91.8896  31
   1   5  -8 2094.66 91.4302  26
   1   5  -8 2090.17 105.108   2
   1   5  -8 2057.73 93.2106  31
  -1   5   8 2054.49 92.2692  12
  -1   5   7 1281.45 72.9157   2
   1   5  -7 1336.36 61.3919  26
  -1   5   7 1470.69 62.0262  31
   1   5  -7 1321.00 62.9282  27
   1   5  -7 1327.32 76.7278   2
   1   5  -7 1348.58 63.7872  31
   1   5  -7 1338.57 63.5889  22
  -1   5   7 1347.95 62.5491  12
   1   5  -7 1218.36 61.0401   6
   1   5  -6 1006.05 79.8787  25
  -1   5   6 1208.36 54.1695  31
  -1   5   6 1186.26 64.9107   2
   1   5  -6 1115.36 53.2080  26
   1   5  -6 1068.90 56.3432   5
   1   5  -6 1140.54 55.7560  27
   1   5  -6 1104.23 68.6286   2
   1   5  -6 1110.57 56.1333  31
  -1   5   5 4743.59 204.210  25
   1   5  -5 4793.95 194.984  31
  -1   5   5 4693.83 194.002  22
   1   5  -5 4646.10 194.689  27
  -1   5   5 4706.72 201.558   2
   1   5  -5 4792.39 203.894   2
   1   5  -5 4495.14 209.939  25
  -1   5   5 4745.82 194.128  31
   1   5  -5 4684.91 193.974  26
  -1   5   4 488.724 31.9806  31
  -1   5   4 550.052 44.4825   2
   1   5  -4 533.813 66.5216  25
   1   5  -4 405.890 49.3260   2
   1   5  -4 450.189 34.7034  31
   1   5  -4 434.768 33.6063  27
   1   5  -4 507.539 32.0688  26
  -1   5   4 470.270 30.4557  22
  -1   5   4 427.817 56.0397  25
  -1   5   3 2581.91 110.850  31
   1   5  -3 2575.60 110.959  26
   1   5  -3 2645.82 111.954  22
   1   5  -3 2793.52 132.608  25
  -1   5   3 2640.85 126.620  25
   1   5  -3 2573.72 111.876  27
   1   5  -3 2659.37 122.184   2
   1   5  -3 2720.73 112.056  31
  -1   5   3 2591.49 119.215   2
  -1   5   3 2648.94 110.962  22
  -1   5   2 484.180 32.3027  22
   1   5  -2 452.360 33.3081  22
  -1   5   2 513.470 45.1897   2
   1   5  -2 537.668 68.4854  25
   1   5  -2 505.939 34.6915  31
  -1   5   2 423.678 60.0815  25
   1   5  -2 521.772 31.8785  26
  -1   5   2 502.652 32.0563  31
   1   5  -2 487.942 49.6760   2
   1   5  -1 1779.01 76.8498  22
  -1   5   1 1688.66 96.6460  25
   1   5  -1 1685.96 76.9600  31
  -1   5   1 1699.73 75.9648  31
  -1   5   1 1756.02 85.0468   2
   1   5  -1 1922.71 88.3127   2
   1   5  -1 1730.73 100.485  25
  -1   5   1 1705.51 76.5476  22
   1   5   0 118.643 27.0677  31
  -1   5   0 195.716 24.5360  31
  -1   5   0 143.867 25.9789  22
  -1   5   0 138.873 39.4458   2
   1   5   0 119.847 61.2608  25
   1   5   0 165.260 26.1630  22
  -1   5   0 180.539 58.7997  25
   1   5   0 200.090 43.1321   2
   1   5   1 2917.78 137.625  25
  -1   5  -1 2799.68 118.852  22
   1   5   1 2732.26 118.375  22
  -1   5  -1 2772.36 117.921  31
  -1   5  -1 2847.69 125.808   2
   1   5   1 2905.24 127.981   2
  -1   5  -1 2792.39 134.933  25
   1   5   1 2870.37 118.543  31
   1   5   2 4280.33 190.042  25
   1   5   2 4382.09 175.848  22
  -1   5  -2 4181.82 175.426  31
   1   5   2 4337.25 183.768   2
  -1   5  -2 4091.61 190.256  25
  -1   5  -2 4442.14 182.720   2
  -1   5  -2 4220.13 176.235  22
   1   5   2 4140.60 175.772  31
   1   5   3 5719.49 236.661  31
   1   5   3 5832.91 244.383   2
   1   5   3 5847.47 235.864  30
  -1   5  -3 5753.24 236.454  31
   1   5   3 5565.73 249.036  25
  -1   5  -3 5948.63 243.667   2
  -1   5  -3 5444.76 249.612  25
   1   5   3 5750.07 236.513  22
  -1   5  -3 5707.08 237.061  22
   1   5   4 2110.08 103.231   2
  -1   5  -4 2130.07 93.4100  31
   1   5   4 2263.30 111.209  25
  -1   5  -4 2098.95 94.6754  22
  -1   5  -4 2206.92 93.1644  27
  -1   5  -4 2065.07 112.775  25
  -1   5  -4 2290.50 103.164   2
   1   5   4 2146.11 92.3711  30
   1   5   4 2226.97 93.8267  31
   1   5   4 2235.20 93.2218  22
   1   5   5 4579.67 192.878  30
  -1   5  -5 4569.35 208.530  25
   1   5   5 4795.04 193.608  31
   1   5   5 4455.03 206.278  25
  -1   5  -5 4773.81 201.544   2
  -1   5  -5 4673.60 194.244  22
   1   5   5 5038.80 202.848   2
  -1   5  -5 4646.41 193.429  31
  -1   5  -6 860.781 45.6946  31
  -1   5  -6 814.109 46.4865  22
   1   5   6 824.110 44.8858  12
  -1   5  -6 995.309 59.1051   2
   1   5   6 935.438 59.2485   2
   1   5   6 836.371 45.9944  31
  -1   5  -6 864.277 47.4061   5
   1   5   6 866.538 43.1867  30
  -1   5  -7 1506.38 69.3949  31
   1   5   7 1454.65 68.8018  12
  -1   5  -7 1465.10 70.5679   5
  -1   5  -7 1482.19 67.8464   6
   1   5   7 1517.52 67.1916  34
   1   5   7 1516.19 67.4192  30
   1   5   7 1602.11 69.3664  31
  -1   5  -7 1542.23 81.0213   2
   1   5   8 2280.12 93.9007  30
   1   5   8 2296.72 95.1375  31
  -1   5  -8 2116.28 95.0242  31
   1   5   8 2076.20 95.1435  12
  -1   5  -8 2144.91 94.0447   6
   1   5   8 2215.16 93.7471  34
   1   5   9 2148.96 90.9088  30
  -1   5  -9 2133.73 91.1096   6
   1   5   9 2013.39 90.7578  34
  -1   5  -9 1996.65 91.8516  31
   1   5   9 1970.93 91.7836  12
   1   5   9 2237.58 92.3343  31
   1   5  10 2579.58 104.541  30
  -1   5 -10 2548.51 107.083   5
   1   5  10 2514.68 104.663  34
   1   5  10 2401.85 105.774  12
  -1   5 -10 2364.48 106.148  31
  -1   5 -10 2153.60 104.001  16
   1   5  10 2574.24 105.316  31
  -1   5 -10 2466.67 104.729   6
  -1   5 -11 846.235 49.8358   5
   1   5  11 814.511 46.5892  12
  -1   5 -11 748.484 43.2240  16
   1   5  11 844.149 44.5572  30
  -1   5 -11 789.988 47.4218  31
  -1   5 -11 790.615 45.0170   6
   1   5  11 869.345 44.6046  34
  -1   5 -12 1713.39 78.1067   5
  -1   5 -12 1601.11 76.8652  31
  -1   5 -12 1714.34 75.1463   6
   1   5  12 1700.43 75.3664  34
   1   5  12 1580.18 76.2348  12
   1   5  12 1677.99 74.8070  30
  -1   5 -12 1560.48 73.2375  16
  -1   5 -13 1105.12 54.3540   6
   1   5  13 1196.59 54.2673  34
  -1   5 -13 961.608 56.6778  31
   1   5  13 990.287 56.3919  12
   1   5  13 1138.26 54.0143  30
  -1   5 -13 937.741 50.9432  16
  -1   5 -14 198.626 26.3158  16
  -1   5 -14 129.912 35.9462  31
   1   5  14 243.898 32.3199  30
   1   5  14 144.759 36.3311  12
   1   5  14 225.695 33.4272  34
  -1   5 -14 213.423 33.5005   6
  -1   5 -15 50.8203 37.8948  31
   1   5  15 71.5949 40.8104  12
   1   5  15 162.282 37.2714  34
   1   5  15 261.490 36.2986  30
  -1   5 -15 214.233 37.7985   6
  -1   5 -16 4628.40 207.511  31
  -1   5 -16 5221.00 207.623   6
   1   5  16 4912.00 209.547  12
   1   5  16 5080.86 207.792  34
  -1   5 -17 1080.90 60.0700  31
   1   5  17 1074.45 64.7665  12
   1   5  17 1170.46 61.4664  34
  -1   5 -18 56.6711 35.8986  31
   1   5  18-9.38515 41.7085  12
  -1   5 -19 173.168 39.2456  22
   1   5  19 127.754 42.3673  12
  -1   5 -19 75.0299 35.8153  31
  -1   5 -19 159.631 47.3478   7
   1   5  20 107.668 42.8145  12
  -1   5 -20 132.059 35.5973  31
  -1   5 -20 170.784 48.9228   7
  -1   5 -20 150.852 38.2937  22
  -1   5 -21 384.406 51.5778   7
  -1   5 -21 335.323 43.2894   6
  -1   5 -21 311.238 39.6592  22
   1   5  21 334.487 45.1618  12
  -1   5 -22 1111.50 64.8057  22
  -1   5 -22 1315.83 68.1155   6
   1   5  22 1258.06 70.0676  12
  -1   5 -23 46.9702 37.5204   6
   1   5  23 28.0385 41.8421  12
  -1   5 -23 7.19886 47.9119   7
  -1   5 -23 63.5921 31.2277  22
  -1   5 -24 298.489 38.9739   6
   1   5  24 327.842 42.6307  12
  -1   5 -24 319.800 48.7601   7
  -1   5 -25 275.337 35.0984   6
   1   5  25 270.657 39.7671  12
  -1   5 -25 276.729 44.1541   7
  -1   5 -26-3.33111 27.9607   6
   1   5  26 32.3073 33.8503  12
  -1   5 -27 85.6372 25.4938   6
   1   5  27 62.3041 31.9844  12
   1   5  28 25.1640 27.7945  12
  -1   5 -28 19.2797 21.4006   6
   1   5  29 276.860 26.8403  12
  -1   5 -29 281.440 21.0668   6
   1   6 -28 82.2790 19.5693   6
   1   6 -28 81.2092 26.7295   7
   1   6 -27 390.948 29.3144   6
   1   6 -27 431.837 35.4211   7
   1   6 -26 107.761 27.4430   6
  -1   6  26 93.4433 30.9554  12
   1   6 -26 188.092 35.4421   7
   1   6 -25 30.9635 31.1775   6
  -1   6  25 36.3154 33.5246  12
   1   6 -24 121.948 42.1615   7
   1   6 -24 98.2578 35.0343   6
  -1   6  24 140.860 37.6134  12
   1   6 -23 609.297 45.9949   6
   1   6 -23 675.677 52.4397   7
  -1   6  23 528.021 47.5847  12
   1   6 -22 182.149 39.1384   6
   1   6 -22 108.700 45.8845   7
   1   6 -22 140.284 30.4209  22
   1   6 -22 98.5381 32.4058  31
  -1   6  22 157.455 43.0243  12
   1   6 -21 435.128 41.1359  31
  -1   6  21 449.908 48.1542  12
   1   6 -21 579.131 52.0073   7
   1   6 -21 475.210 38.7710  22
  -1   6  20 336.180 48.3776  12
   1   6 -20 250.099 38.2657  31
   1   6 -20 309.219 36.6409  22
  -1   6  20 273.456 53.5911  15
   1   6 -19 138.865 36.2917  22
  -1   6  19 81.0530 53.1556  15
  -1   6  19 129.937 46.0341  12
   1   6 -19 115.946 34.9804  27
   1   6 -19 77.7289 37.3676  31
  -1   6  18 409.986 58.5221  15
   1   6 -18 394.647 41.0246  27
  -1   6  18 390.242 48.5803  12
   1   6 -18 465.310 42.1748  22
   1   6 -18 420.706 43.1103  31
  -1   6  17 1680.71 83.8150  12
   1   6 -17 1678.79 80.8861   6
   1   6 -17 1767.13 80.8985  22
   1   6 -17 1545.10 80.0201  27
  -1   6  17 1593.10 89.9961  15
   1   6 -17 1643.93 81.4482  31
  -1   6  16 2541.80 117.441  12
   1   6 -16 2790.48 115.932   6
   1   6 -16 2495.10 116.097  27
   1   6 -16 2604.33 116.169  22
   1   6 -16 2544.58 117.366  31
  -1   6  16 2617.04 122.549  15
  -1   6  15 1174.07 67.0197  12
   1   6 -15 1352.18 65.0902   6
   1   6 -15 1240.15 66.6675  27
   1   6 -15 1175.45 65.9397  22
  -1   6  15 1230.66 77.0557  15
   1   6 -15 1239.94 68.0070  31
  -1   6  14 506.667 44.5325  12
   1   6 -14 564.332 43.2858   6
   1   6 -14 611.072 48.6630   5
   1   6 -14 499.371 36.6097  16
   1   6 -14 550.085 44.9310  27
   1   6 -14 499.141 46.8451  31
  -1   6  14 484.296 57.8610  15
   1   6 -14 586.145 45.3252  22
   1   6 -13 216.379 37.8978  27
   1   6 -13 220.290 30.3039  16
   1   6 -13 246.574 35.6548   6
   1   6 -13 263.895 39.3452  22
  -1   6  13 229.825 37.0792  12
  -1   6  13 214.739 52.1753  15
   1   6 -13 181.442 39.3949  31
   1   6 -13 266.209 42.7827   5
  -1   6  12 2445.45 111.543  12
   1   6 -12 2492.49 112.123  31
  -1   6  12 2716.71 108.504  30
   1   6 -12 2670.35 112.756  22
   1   6 -12 2671.59 110.630   6
   1   6 -12 2204.31 108.750  16
  -1   6  12 2626.45 118.356  15
   1   6 -12 2476.71 111.527  27
   1   6 -12 2579.08 113.231   5
  -1   6  11 555.800 35.0483  30
   1   6 -11 545.241 40.1009   6
  -1   6  11 595.814 55.5551  15
   1   6 -11 498.786 43.1463  31
   1   6 -11 527.137 42.0960  27
  -1   6  11 521.949 41.7141  12
   1   6 -11 621.818 47.0813   5
   1   6 -11 636.008 44.3239  22
  -1   6  10 6.69285 30.4852  12
   1   6 -10 23.8268 29.6825   6
   1   6 -10 25.2642 33.6241  22
  -1   6  10 55.8880 48.0939  15
   1   6 -10-8.62332 32.7599  27
   1   6 -10-12.4419 35.2913  31
   1   6  -9 897.084 52.2175  31
  -1   6   9 854.609 50.3753  12
   1   6  -9 889.674 50.6700  27
  -1   6   9 1010.36 49.5263  31
   1   6  -9 906.929 52.9692  22
  -1   6   9 962.107 62.2358  15
   1   6  -9 889.243 49.2017   6
  -1   6   8 1588.44 81.1562  15
   1   6  -8 1566.50 71.8131   6
   1   6  -8 1596.78 74.0277  31
   1   6  -8 1507.38 74.4722  22
   1   6  -8 1614.93 75.6375   5
  -1   6   8 1603.74 71.8105  31
   1   6  -8 1509.35 73.2258  27
   1   6  -7 1452.17 73.1729  27
  -1   6   7 1688.83 72.6365  31
   1   6  -7 1544.80 73.9391  31
  -1   6   7 1572.58 81.5297  15
   1   6  -7 1640.69 75.8101   5
   1   6  -7 1575.69 71.6836   6
   1   6  -6 142.074 35.3796   5
   1   6  -6 153.529 31.1791  27
  -1   6   6 165.525 45.3357  15
  -1   6   6 152.878 28.4349  31
   1   6  -6 133.237 31.5982  31
   1   6  -6 154.588 27.3385   6
   1   6  -6 100.723 44.9287  15
  -1   6   5 833.305 46.2327  31
  -1   6   5 854.361 58.1545  15
   1   6  -5 912.798 49.0356  31
   1   6  -5 901.813 58.9243  15
   1   6  -5 894.260 50.7094   5
   1   6  -5 835.734 44.9676   6
  -1   6   5 895.469 45.2592  22
   1   6  -5 852.811 48.5613  27
   1   6  -4 1075.05 53.3480  31
  -1   6   4 977.223 50.7546  22
   1   6  -4 910.967 49.2759   6
   1   6  -4 1058.40 62.2824  15
  -1   6   4 1021.38 61.2678  15
   1   6  -4 1028.73 53.3694  22
  -1   6   4 1097.98 51.2363  31
   1   6  -4 1004.62 54.7474   5
  -1   6   3 2419.19 103.023  31
   1   6  -3 2117.13 101.584   6
  -1   6   3 2562.20 103.270  22
   1   6  -3 2493.93 104.481  22
   1   6  -3 2329.28 105.217   5
  -1   6   3 2523.89 109.217  15
   1   6  -3 2398.92 109.662  15
   1   6  -3 2468.24 104.287  31
  -1   6   2 2549.33 111.606  31
   1   6  -2 2552.83 112.463  31
   1   6  -2 2770.03 113.854   5
   1   6  -2 2709.58 112.801  22
  -1   6   2 2476.92 111.556  22
  -1   6   2 2650.96 112.197   5
  -1   6   2 2733.81 117.195  15
   1   6  -1 1215.28 63.6602   5
  -1   6   1 1263.65 61.4066  22
   1   6  -1 1302.50 61.9874  31
  -1   6   1 1235.70 62.2748   5
  -1   6   1 1309.09 60.5564  31
   1   6  -1 1358.15 61.7322  22
  -1   6   1 1292.37 69.2612  15
   1   6   0 674.934 41.4771  22
  -1   6   0 729.415 51.9901  15
  -1   6   0 665.859 41.4401  22
  -1   6   0 728.310 43.6919   5
  -1   6   0 729.290 40.9823  31
   1   6   0 790.826 43.0273  31
   1   6   0 696.872 45.0604   5
  -1   6  -1 1924.62 88.4399  15
   1   6   1 1746.27 83.0462   5
   1   6   1 1922.19 81.8778  22
  -1   6  -1 1830.48 82.1511  22
   1   6   1 1838.59 82.4214  31
  -1   6  -1 1828.81 83.1342   5
   1   6   1 1807.24 88.2165  15
  -1   6  -1 1823.93 81.1047  31
   1   6   2 58.2305 27.5333  22
  -1   6  -2 58.5135 42.1260  15
   1   6   2 67.9609 29.4618  31
  -1   6  -2 20.9545 29.6792  22
   1   6   2 56.6589 30.9079   5
   1   6   2 73.3920 42.3630  15
  -1   6  -2 75.5723 32.5993   5
  -1   6  -2 63.6672 27.5720  31
  -1   6  -3 836.480 47.0268  22
   1   6   3 917.540 45.2257  22
  -1   6  -3 857.658 49.3978   5
  -1   6  -3 794.647 44.9743  31
   1   6   3 877.143 47.2165   5
   1   6   3 827.979 56.4636  15
   1   6   3 935.796 46.5210  31
  -1   6  -3 730.057 42.0315   6
  -1   6  -4 424.528 33.8716  31
  -1   6  -4 464.376 36.9393  22
   1   6   4 432.299 47.3189  15
  -1   6  -4 411.319 30.1915   6
  -1   6  -4 470.790 39.0143   5
   1   6   4 429.117 34.9692  31
   1   6   5 222.373 31.0804  31
  -1   6  -5 183.117 26.2571   6
  -1   6  -5 207.121 29.6077  31
  -1   6  -5 205.970 32.8631  22
  -1   6  -5 212.125 34.9483   5
   1   6   5 215.098 44.4651  15
  -1   6  -6 424.439 39.6394   5
   1   6   6 417.798 35.5995  31
  -1   6  -6 413.911 32.1488   6
  -1   6  -6 452.710 38.1397  22
  -1   6  -6 486.228 35.0315  31
   1   6   6 398.713 48.2600  15
   1   6   6 423.930 30.2726  30
  -1   6  -7 2201.66 95.1964   6
  -1   6  -7 2027.63 98.0299  22
  -1   6  -7 2120.26 96.2488  31
   1   6   7 2153.85 94.3215  30
   1   6   7 2404.91 96.9530  31
  -1   6  -7 2309.54 98.2631   5
   1   6   7 2035.58 102.600  15
  -1   6  -8 2138.16 96.3550   6
   1   6   8 2221.03 95.6049  30
  -1   6  -8 2306.83 97.8065  31
  -1   6  -8 2285.82 99.6129   5
   1   6   8 2088.36 98.0334  12
   1   6   8 2341.03 97.8874  31
   1   6   8 2079.48 104.710  15
   1   6   9 213.884 34.4544  12
   1   6   9 291.415 34.3668  31
  -1   6  -9 284.740 32.2808   6
  -1   6  -9 311.347 39.2520   5
   1   6   9 276.894 29.5293  30
  -1   6  -9 195.143 33.9908  31
   1   6  10 577.098 40.8689  31
   1   6  10 554.280 41.3162  12
  -1   6 -10 469.473 38.2520  16
  -1   6 -10 529.148 38.6497   6
  -1   6 -10 526.050 41.2052  31
   1   6  10 587.637 36.2895  30
   1   6  11 173.437 35.3922  12
   1   6  11 255.410 31.3191  30
  -1   6 -11 168.654 35.0770  31
  -1   6 -11 203.736 38.6544  22
  -1   6 -11 267.811 34.2501   6
  -1   6 -11 188.488 31.3279  16
   1   6  12 192.327 30.5153  34
  -1   6 -12 185.965 36.6252  31
  -1   6 -12 205.957 31.2908  16
  -1   6 -12 184.194 34.1327   6
  -1   6 -12 251.474 42.3022   5
   1   6  12 209.835 32.1315  30
  -1   6 -12 202.828 38.8737  22
   1   6  12 186.958 36.7373  12
   1   6  13 127.097 38.1150  12
  -1   6 -13 122.166 39.3418  22
  -1   6 -13 199.445 35.7030   6
   1   6  13 154.737 31.5534  34
  -1   6 -13 123.405 36.0641  31
   1   6  13 134.076 32.1312  30
  -1   6 -13 200.768 30.3095  16
   1   6  14 987.290 52.2779  30
  -1   6 -14 932.252 57.7062  22
   1   6  14 842.762 57.8471  12
   1   6  14 990.595 52.4152  34
  -1   6 -14 874.155 49.7330  16
  -1   6 -14 980.297 54.9052   6
  -1   6 -15 127.049 28.6554  16
  -1   6 -15 123.739 40.5872  22
  -1   6 -15 137.395 38.0329   6
   1   6  15 56.7728 42.7688  12
   1   6  15 130.888 34.3021  34
   1   6  16 411.183 49.3066  12
  -1   6 -16 419.308 41.9728   6
  -1   6 -16 372.374 43.8955  22
  -1   6 -17 585.100 47.7864   6
   1   6  17 587.289 54.0898  12
  -1   6 -17 667.871 48.9730  22
  -1   6 -18 478.127 46.4458   6
   1   6  18 442.113 50.5155  12
  -1   6 -18 614.341 51.3304   7
  -1   6 -18 505.055 45.3944  22
  -1   6 -19 827.529 56.7593   7
  -1   6 -19 671.157 49.7196  22
   1   6  19 673.691 54.5651  12
  -1   6 -19 655.155 51.0799   6
  -1   6 -20 210.045 47.4492   7
  -1   6 -20 143.805 37.3193  22
   1   6  20 120.601 43.6111  12
   1   6  21 32.4664 41.5688  12
  -1   6 -21 51.2934 34.4328  22
  -1   6 -21 76.3361 46.8950   7
   1   6  21 62.1651 54.9875  15
   1   6  22 510.050 57.4539  15
   1   6  22 552.418 47.5853  12
  -1   6 -22 427.938 39.2621  22
  -1   6 -23 75.3462 35.9503   6
   1   6  23 52.2825 38.2189  12
   1   6  23 61.0708 46.8415  15
  -1   6 -23 89.7932 43.0528   7
  -1   6 -23 30.6305 27.7175  22
   1   6  24 44.3416 35.7776  12
  -1   6 -24 131.206 39.5956   7
  -1   6 -24 42.7880 31.9828   6
   1   6  25 111.546 32.7514  12
  -1   6 -25 135.102 36.9738   7
  -1   6 -25 111.062 29.6964   6
  -1   6 -26 72.3971 31.9096   7
  -1   6 -26 51.0153 25.6612   6
   1   6  26 64.8839 29.7032  12
  -1   6 -27 653.463 35.8954   6
  -1   6 -27 693.001 40.4414   7
   1   7 -26 46.1313 25.7427   7
   1   7 -26 55.1430 21.4221   6
   1   7 -25 28.6703 25.1006   6
   1   7 -25 60.0483 29.8335   7
   1   7 -24 81.9883 33.1833   7
   1   7 -23 370.361 39.8998   7
   1   7 -22 145.960 26.5131  22
   1   7 -22 177.913 40.2951   7
   1   7 -21 603.978 40.8897  22
   1   7 -21 771.153 50.4927   7
   1   7 -20 332.685 41.7402   6
   1   7 -20 297.525 44.0206   7
  -1   7  20 225.024 50.0629  15
   1   7 -20 301.246 34.5203  22
   1   7 -19 503.356 46.0004   6
   1   7 -19 508.634 48.2827   7
   1   7 -19 494.181 40.9627  22
  -1   7  19 563.845 56.5171  15
   1   7 -18 253.279 36.7581  22
   1   7 -18 196.926 35.0906  31
   1   7 -18 257.896 41.6349   6
  -1   7  18 331.647 56.4628  15
   1   7 -17 367.588 43.1218   6
  -1   7  17 354.713 57.6954  15
   1   7 -17 341.869 40.3041  22
   1   7 -17 323.255 39.1168  31
   1   7 -16 1376.45 67.9766   6
  -1   7  16 1192.56 78.8966  15
   1   7 -16 1218.46 65.7742  31
   1   7 -16 1246.61 66.8777  22
   1   7 -15 43.5592 38.4698   6
  -1   7  15-7.98362 56.7877  15
   1   7 -15 56.1869 38.7037  22
   1   7 -15 1.85845 28.5842  16
   1   7 -15 14.7675 38.5866  31
   1   7 -14 115.684 31.1061  16
  -1   7  14 111.382 57.9684  15
   1   7 -14 123.644 40.6275  22
   1   7 -14 82.5313 39.9866  31
   1   7 -14 74.5594 38.5227   6
   1   7 -14 147.277 47.7455   5
   1   7 -13 423.046 38.1798  16
  -1   7  13 523.408 61.7223  15
   1   7 -13 376.044 45.8199  31
   1   7 -13 538.930 52.2563   5
   1   7 -13 364.160 43.7530  27
   1   7 -13 449.855 43.2988   6
   1   7 -13 473.961 45.3120  22
  -1   7  12 385.406 60.2570  15
   1   7 -12 315.784 36.4053  16
   1   7 -12 269.499 43.0728  31
   1   7 -12 367.809 39.7832   6
   1   7 -12 302.875 41.2045  27
   1   7 -12 298.622 42.4842  22
   1   7 -11 42.8527 35.8232   6
   1   7 -11 47.0285 39.0668  31
   1   7 -11 38.3934 33.2908  16
  -1   7  11 79.1960 54.7967  15
   1   7 -11 39.1091 40.5417  22
   1   7 -11 41.2180 37.2796  27
   1   7 -10 982.337 58.5967  22
   1   7 -10 962.612 57.8462  31
  -1   7  10 934.006 70.4482  15
   1   7 -10 971.279 54.3141   6
   1   7 -10 966.932 56.7511  27
   1   7  -9 798.708 53.1009  31
   1   7  -9 808.121 54.7112  22
   1   7  -9 853.678 58.5542   5
  -1   7   9 879.620 67.2041  15
   1   7  -9 855.031 50.1007   6
  -1   7   8 2144.25 91.3627  31
  -1   7   8 2096.90 102.040  15
   1   7  -8 2013.70 95.6115   5
   1   7  -8 1919.65 92.9001  31
   1   7  -8 1988.07 90.6830   6
  -1   7   7 676.657 62.2009  15
   1   7  -7 670.849 47.9640  31
   1   7  -7 668.619 43.5061   6
  -1   7   7 765.634 44.9098  31
   1   7  -7 675.138 52.6395   5
   1   7  -6 181.037 42.5324   5
   1   7  -6 204.157 31.2010   6
  -1   7   6 208.973 33.4319  31
  -1   7   6 178.279 53.3426  15
   1   7  -6 179.329 36.6181  31
   1   7  -5 255.588 38.0176  22
  -1   7   5 235.314 33.8541  31
   1   7  -5 249.753 36.9577  31
   1   7  -5 209.183 30.7976   6
   1   7  -5 230.442 54.3054  15
  -1   7   5 273.985 53.9978  15
   1   7  -5 189.183 42.0429   5
   1   7  -4 831.319 47.0164   6
   1   7  -4 859.061 55.9296   5
   1   7  -4 880.322 51.8338  31
  -1   7   4 926.365 50.0690  22
   1   7  -4 828.756 52.6783  22
   1   7  -4 930.035 66.6070  15
  -1   7   4 924.812 65.1791  15
  -1   7   4 893.038 49.4084  31
   1   7  -3 345.263 31.7496   6
  -1   7   3 359.662 37.2727   5
  -1   7   3 381.488 36.0064  31
   1   7  -3 373.575 42.8101   5
  -1   7   3 440.062 54.6349  15
   1   7  -3 400.753 38.9077  22
  -1   7   3 427.667 36.7209  22
   1   7  -3 344.583 37.9475  31
   1   7  -2 1374.58 68.7513  22
  -1   7   2 1358.71 66.9762  22
  -1   7   2 1420.56 79.2381  15
   1   7  -2 1396.44 70.8802   5
  -1   7   2 1344.80 66.3937  31
  -1   7   2 1446.69 68.5062   5
   1   7  -2 1424.28 68.4825  31
  -1   7   1 1208.91 71.7041  15
  -1   7   1 1097.89 60.2662   5
  -1   7   1 1102.79 58.8449  22
   1   7  -1 1113.13 62.1230   5
  -1   7   1 1111.81 57.6383  31
   1   7  -1 1230.59 59.5042  31
   1   7  -1 1156.52 59.2964  22
  -1   7   0 364.253 53.8081  15
  -1   7   0 368.383 39.3672   5
   1   7   0 379.126 37.1170  31
   1   7   0 417.801 41.2588   5
  -1   7   0 371.371 36.7009  22
  -1   7   0 336.329 34.8679  31
   1   7   0 400.832 37.2961  22
  -1   7  -1 716.556 50.1733   5
   1   7   1 804.040 47.8990  22
  -1   7  -1 805.063 46.0118  31
  -1   7  -1 710.304 61.3872  15
   1   7   1 812.455 48.2879  31
   1   7   1 787.957 61.3804  15
  -1   7  -1 780.077 48.3106  22
   1   7   1 785.652 50.1164   5
   1   7   2 34.3961 34.7151  31
  -1   7  -2 2.11149 52.1783  15
  -1   7  -2 26.4357 34.4435  22
   1   7   2 53.1821 32.3839  22
  -1   7  -2 1.89213 31.1414  31
  -1   7  -2 35.8871 37.8290   5
   1   7   2 10.9538 36.0098   5
   1   7   2 25.4981 52.0349  15
   1   7   3 2167.34 96.5372  31
  -1   7  -3 2011.23 97.0152  22
  -1   7  -3 2133.63 95.0993  31
   1   7   3 2044.42 96.3887   5
  -1   7  -3 2297.01 98.1641   5
   1   7   3 2239.52 105.068  15
  -1   7  -4 3468.89 154.473  22
  -1   7  -4 3626.77 151.031   6
  -1   7  -4 3772.09 154.982   5
   1   7   4 3662.65 152.911   5
  -1   7  -4 3434.04 152.433  31
   1   7   4 3698.12 159.452  15
   1   7   4 3666.01 153.197  31
   1   7   5 2119.41 106.554  15
  -1   7  -5 2179.00 99.8484   5
  -1   7  -5 2187.27 96.1687  31
   1   7   5 2202.90 97.1134  31
  -1   7  -5 2086.62 94.5837   6
  -1   7  -5 2207.30 98.9793  22
  -1   7  -6 207.563 30.9415   6
  -1   7  -6 169.751 39.1320  22
   1   7   6 153.026 54.3679  15
  -1   7  -6 241.845 42.6252   5
  -1   7  -6 164.397 34.6828  31
   1   7   6 230.154 37.2605  31
  -1   7  -7-7.18745 30.0368   6
  -1   7  -7-28.5523 37.7132  22
   1   7   7 73.0733 36.4978  31
   1   7   7-47.0927 55.3264  15
  -1   7  -7-1.57279 33.6903  31
  -1   7  -7 31.7229 41.9566   5
   1   7   8 386.415 58.4570  15
  -1   7  -8 416.614 47.3100   5
  -1   7  -8 396.959 37.0646   6
   1   7   8 501.695 41.1033  31
  -1   7  -9 482.390 40.1538   6
  -1   7  -9 524.071 50.2336   5
   1   7   9 558.845 43.2424  31
  -1   7  -9 448.161 41.5568  16
   1   7  10 3552.67 146.312  30
  -1   7 -10 3685.34 151.039   5
   1   7  10 3218.01 156.063  15
  -1   7 -10 3269.02 147.530  16
  -1   7 -10 3504.98 147.619   6
  -1   7 -11 245.989 37.7300   6
   1   7  11 269.434 62.3310  15
  -1   7 -11 269.627 37.0947  16
   1   7  11 217.151 32.1460  30
   1   7  12 240.185 32.8230  30
   1   7  12 225.127 62.0203  15
  -1   7 -12 157.600 38.0030   6
  -1   7 -12 152.089 43.1798  22
  -1   7 -12 144.169 34.9428  16
  -1   7 -13 404.870 38.1910  16
  -1   7 -13 419.931 46.9009  22
  -1   7 -13 406.810 42.4461   6
   1   7  13 399.196 36.6959  30
   1   7  13 425.069 64.1098  15
  -1   7 -14 512.612 45.8495   6
  -1   7 -14 531.127 39.5039  16
   1   7  14 573.888 65.7400  15
  -1   7 -14 534.767 48.9966  22
  -1   7 -15 552.358 38.3403  16
  -1   7 -15 436.654 46.8613  22
  -1   7 -15 514.693 45.7576   6
   1   7  15 479.632 65.4561  15
  -1   7 -15 545.560 47.2209   7
  -1   7 -16 1901.87 89.1115   7
   1   7  16 1870.77 99.0572  15
  -1   7 -16 1732.97 82.0133  16
  -1   7 -16 1706.92 88.4865  22
  -1   7 -16 2069.98 88.1592   6
  -1   7 -17 1500.36 76.2463  22
   1   7  17 1446.42 89.3292  15
  -1   7 -17 1585.96 77.9415   7
  -1   7 -17 1540.87 76.7486   6
  -1   7 -18 43.3773 42.8798   7
  -1   7 -18 70.2861 39.4078   6
  -1   7 -18 7.94585 36.1262  22
   1   7  18 40.0805 57.7829  15
   1   7  19 364.139 58.8701  15
  -1   7 -19 380.418 39.9705  22
  -1   7 -19 393.965 43.2449   6
  -1   7 -19 359.183 46.4236   7
  -1   7 -20 71.5099 38.3733   6
  -1   7 -20 88.3248 41.0050   7
  -1   7 -20 93.3795 32.8847  22
   1   7  20 34.2854 53.8132  15
  -1   7 -21 377.507 35.1566  22
  -1   7 -21 430.050 42.7269   7
  -1   7 -21 384.753 41.8923   6
   1   7  21 410.366 52.9178  15
  -1   7 -22 33.7060 26.1653  22
   1   7  22 68.7238 44.6153  15
  -1   7 -22 18.7361 36.9835   7
  -1   7 -23 247.221 25.4853  22
  -1   7 -23 296.702 35.9357   7
  -1   7 -24 67.2273 30.4228   7
  -1   7 -25 109.805 27.0436   7
   1   8 -24 150.537 23.3132   7
   1   8 -23 78.0952 25.8197   7
   1   8 -23 131.057 24.7719   6
   1   8 -22 10.6390 28.3124   7
   1   8 -22-9.20218 27.6481   6
   1   8 -21 501.128 32.6099  22
   1   8 -21 609.241 39.1242   7
   1   8 -21 521.250 38.8306   6
   1   8 -20 17.1000 33.2371   7
   1   8 -20 37.3479 25.7492  22
   1   8 -20 17.5177 31.6904   6
  -1   8  19 232.513 46.0645  15
   1   8 -19 238.114 35.3031   6
   1   8 -19 214.171 30.5674  22
   1   8 -19 233.753 36.0121   7
   1   8 -18 65.6895 35.2017   6
   1   8 -18 62.6363 29.5684  22
  -1   8  18 37.5055 48.1616  15
   1   8 -18 28.8870 35.1134   7
   1   8 -17 133.424 36.6923   6
   1   8 -17 122.132 36.9619   7
   1   8 -17 54.9553 33.1302  22
  -1   8  17 144.199 52.1441  15
   1   8 -16-21.3686 26.4311  16
  -1   8  16-15.2977 53.8576  15
   1   8 -16-20.6591 33.9259  22
   1   8 -16-45.0711 37.3464   6
   1   8 -16 36.6807 36.9779   7
   1   8 -15 231.272 31.6906  16
   1   8 -15 261.979 38.4774  22
   1   8 -15 274.833 40.0022   6
  -1   8  15 276.788 57.6189  15
   1   8 -15 353.294 39.0770   7
  -1   8  14 240.607 59.9469  15
   1   8 -14 320.043 34.0226  16
   1   8 -14 344.793 39.9858   6
   1   8 -14 311.180 40.9541  22
   1   8 -13 28.1309 38.1129  22
   1   8 -13 42.5720 32.4689  16
  -1   8  13 11.2531 58.1146  15
   1   8 -13 38.8356 36.6144   6
   1   8 -13 61.3094 34.9992  31
   1   8 -12 186.426 40.2845  22
   1   8 -12 185.499 37.2303  31
   1   8 -12 191.481 37.8341   6
   1   8 -12 149.653 34.9749  16
  -1   8  12 168.802 61.6604  15
  -1   8  11 301.010 62.3262  15
   1   8 -11 264.733 43.5021  22
   1   8 -11 205.953 40.5975  31
   1   8 -11 301.465 52.3475   5
   1   8 -11 248.427 38.3232  16
   1   8 -11 256.714 38.6621   6
   1   8 -10 1269.69 71.2962   5
  -1   8  10 1169.85 80.4664  15
   1   8 -10 1172.70 66.0829  22
   1   8 -10 1257.04 61.6074   6
   1   8 -10 1158.41 64.2095  31
   1   8 -10 1018.79 61.8287  16
   1   8  -9 113.985 34.5066   6
  -1   8   9 98.1753 61.7726  15
   1   8  -9 154.323 39.5001  31
   1   8  -9 63.0512 49.1685   5
   1   8  -8 316.304 42.0337  31
   1   8  -8 341.785 37.5144   6
  -1   8   8 358.228 63.6799  15
   1   8  -8 420.108 51.3511   5
  -1   8   7 329.595 64.0946  15
   1   8  -7 299.772 37.1969   6
  -1   8   7 328.539 38.1018  31
   1   8  -7 333.415 50.1038   5
   1   8  -7 228.821 41.1925  31
  -1   8   6 320.554 64.1464  15
   1   8  -6 393.595 45.3197  22
   1   8  -6 349.621 50.3973   5
  -1   8   6 383.831 38.6981  31
   1   8  -6 344.410 36.2741   6
   1   8  -6 314.948 42.1129  31
  -1   8   5 1027.52 76.4685  15
   1   8  -5 977.557 60.4554  22
   1   8  -5 972.952 53.0259   6
  -1   8   5 1013.65 55.8880  31
   1   8  -5 1048.17 64.4641   5
   1   8  -5 961.468 57.6817  31
   1   8  -4 263.806 65.2281  15
   1   8  -4 223.491 32.4326   6
  -1   8   4 252.067 37.8094  31
   1   8  -4 188.571 43.0177  22
   1   8  -4 217.443 40.1319  31
  -1   8   4 161.727 63.7395  15
   1   8  -4 204.714 48.0139   5
  -1   8   3 2334.76 106.796   5
   1   8  -3 2355.41 107.614  31
  -1   8   3 2505.12 120.239  15
  -1   8   3 2433.89 106.496  31
   1   8  -3 2397.21 109.081  22
   1   8  -3 2352.59 110.659   5
   1   8  -2 3252.13 138.524  22
   1   8  -2 3278.94 139.965   5
  -1   8   2 3250.46 137.165  22
   1   8  -2 3023.57 136.939  31
  -1   8   2 3001.38 135.817  31
  -1   8   2 3172.60 137.366   5
  -1   8   2 3120.34 148.165  15
  -1   8   1 8225.45 334.576  15
   1   8  -1 7563.51 329.826   5
   1   8  -1 8029.23 328.993  31
  -1   8   1 7897.76 328.050  31
  -1   8   1 8222.78 329.132  22
   1   8  -1 8336.60 329.828  22
  -1   8   1 7657.43 329.072   5
   1   8   0 3806.47 160.556  22
  -1   8   0 3689.64 160.491  22
   1   8   0 3632.56 161.291   5
  -1   8   0 3819.39 161.100   5
  -1   8   0 3750.28 158.690  31
  -1   8   0 3956.07 170.732  15
   1   8   0 3623.29 160.122  31
  -1   8  -1 1137.59 82.0214  15
  -1   8  -1 1110.99 65.0095   5
   1   8   1 1075.05 63.3202   5
   1   8   1 1003.17 60.4816  31
   1   8   1 1052.36 81.1010  15
  -1   8  -1 1055.93 62.2827  22
  -1   8  -1 972.607 57.6135  31
   1   8   2 1904.90 91.4898   5
  -1   8  -2 1771.86 88.2350  31
  -1   8  -2 1976.76 106.434  15
   1   8   2 1873.68 105.031  15
  -1   8  -2 2016.73 93.8164   5
  -1   8  -2 1916.84 91.5365  22
   1   8   2 2005.27 90.3581  31
  -1   8  -3 1513.24 75.6465   5
  -1   8  -3 1426.83 73.8477  22
  -1   8  -3 1344.59 69.4769  31
   1   8   3 1377.88 72.6788   5
   1   8   3 1417.46 71.8480  31
   1   8   3 1328.34 88.3254  15
   1   8   4 140.397 39.5223   5
   1   8   4 128.371 39.5653  31
  -1   8  -4 207.679 47.1223   5
  -1   8  -4 160.572 42.5885  22
   1   8   4 134.900 64.1346  15
  -1   8  -5 487.822 37.3204   6
   1   8   5 503.363 45.3375  31
  -1   8  -5 411.916 47.8532  22
  -1   8  -5 468.103 51.7832   5
   1   8   5 515.921 67.3361  15
  -1   8  -6 1372.40 67.6185   6
  -1   8  -6 1491.60 76.7977   5
  -1   8  -6 1293.28 74.0715  22
   1   8   6 1459.05 71.5924  31
   1   8   6 1378.20 87.8355  15
  -1   8  -7 728.570 55.7322  22
  -1   8  -7 742.023 53.8149  16
  -1   8  -7 791.472 48.1545   6
  -1   8  -7 932.872 59.9690   5
   1   8   7 827.781 73.8149  15
   1   8   7 850.375 52.8501  31
  -1   8  -8 225.474 40.6421  16
  -1   8  -8 238.438 35.7509   6
  -1   8  -8 233.561 45.1049  22
   1   8   8 228.443 39.8581  31
   1   8   8 245.785 65.0536  15
  -1   8  -8 283.836 49.8287   5
  -1   8  -9 560.613 42.1486   6
   1   8   9 529.094 67.9602  15
  -1   8  -9 595.019 55.5550   5
  -1   8  -9 468.537 45.1718  16
  -1   8 -10 971.122 58.7409  16
   1   8  10 1095.73 79.1371  15
  -1   8 -10 1088.11 57.2179   6
  -1   8 -11 125.117 36.4139   6
  -1   8 -11 120.821 36.7417  16
   1   8  11 139.935 63.1493  15
  -1   8 -12 384.689 40.4439   6
  -1   8 -12 369.052 38.5605  16
  -1   8 -12 391.539 45.2227  22
   1   8  12 381.890 65.7453  15
  -1   8 -13 43.7764 33.0504  16
  -1   8 -13 112.392 36.4039   6
   1   8  13 94.1702 62.6948  15
  -1   8 -13 115.820 39.9166  22
  -1   8 -14-42.6731 37.8605  22
  -1   8 -14 34.9180 35.6512   7
  -1   8 -14-1.44683 30.8636  16
  -1   8 -14 64.8441 36.8339   6
   1   8  14-8.18129 60.4876  15
   1   8  15 73.2617 59.0936  15
  -1   8 -15 113.538 37.4993   6
  -1   8 -15 88.8700 29.6045  16
  -1   8 -15 109.949 37.4807  22
  -1   8 -15 80.5041 36.7932   7
  -1   8 -16 300.664 38.7869   7
   1   8  16 258.316 58.6772  15
  -1   8 -16 336.101 39.3685   6
  -1   8 -16 298.802 30.0955  16
  -1   8 -16 297.914 39.2737  22
  -1   8 -17 192.129 35.2802  22
   1   8  17 200.230 54.6731  15
  -1   8 -17 224.436 37.8303   6
  -1   8 -17 196.506 36.2345   7
  -1   8 -18 56.1043 33.2876   7
  -1   8 -18 29.8119 31.9124  22
   1   8  18 48.2503 51.6831  15
  -1   8 -18 62.3606 33.8253   6
  -1   8 -19 421.590 37.5498   7
  -1   8 -19 348.767 34.4777  22
  -1   8 -19 497.865 39.2777   6
   1   8  19 444.593 52.6782  15
  -1   8 -20 176.310 32.0068   6
  -1   8 -20 119.132 27.0142  22
  -1   8 -20 166.388 32.2364   7
   1   8  20 157.774 44.9164  15
  -1   8 -21 90.9904 29.0474   6
  -1   8 -21 84.4174 28.4026   7
  -1   8 -21 87.1029 22.8309  22
  -1   8 -22 111.424 25.9887   6
  -1   8 -22 87.5301 25.7748   7
  -1   8 -23 102.680 22.9416   6
  -1   8 -23 130.513 23.1583   7
   1   9 -21 9.29130 20.5781   6
   1   9 -20 34.3986 23.2371   6
   1   9 -19 235.844 24.3450  22
   1   9 -19 264.310 28.2218   6
   1   9 -18 11.2435 27.2086   6
   1   9 -18 13.9499 23.7119  22
  -1   9  18 26.6834 38.9830  15
  -1   9  17 349.071 45.1992  15
   1   9 -17 303.723 32.4367   6
   1   9 -17 297.488 29.9564  22
   1   9 -16 353.917 33.5772   6
  -1   9  16 331.145 48.0292  15
   1   9 -16 305.307 31.7994  22
  -1   9  15 131.058 49.1905  15
   1   9 -15 191.370 25.7189  16
   1   9 -15 166.743 31.6887   6
   1   9 -15 206.599 31.8489  22
  -1   9  14 10.0520 51.6427  15
   1   9 -14 43.9806 26.9048  16
   1   9 -14-1.40852 31.2156   6
   1   9 -14 90.9653 31.9805  22
   1   9 -13 31.3312 32.4811   6
   1   9 -13 45.7028 29.6114  16
  -1   9  13 24.0376 54.1681  15
   1   9 -13 65.7850 33.3571  22
   1   9 -12 347.266 36.6459   6
  -1   9  12 357.207 58.5979  15
   1   9 -12 336.252 39.2942  22
   1   9 -12 408.465 36.1721  16
   1   9 -11 309.587 39.8995  22
   1   9 -11 366.957 35.9799   6
   1   9 -11 289.710 36.7550  16
  -1   9  11 312.187 61.1198  15
  -1   9  10 234.908 60.9209  15
   1   9 -10 325.351 39.2265  16
   1   9 -10 300.799 35.2754   6
  -1   9   9 675.846 67.2025  15
   1   9  -9 726.827 56.9459   5
   1   9  -9 613.752 42.8741   6
   1   9  -9 584.895 47.2099  16
   1   9  -8 141.440 32.2987   6
   1   9  -8 259.300 48.9529   5
  -1   9   8 171.495 61.6223  15
   1   9  -8 177.665 39.0830  16
   1   9  -7 95.0652 35.1390  31
  -1   9   7 189.963 62.9585  15
   1   9  -7 105.631 39.2511  22
   1   9  -7 68.8460 31.2261   6
   1   9  -7 141.117 48.4658   5
   1   9  -7 101.360 39.7178  16
   1   9  -6 343.462 44.6581  22
   1   9  -6 384.192 35.7350   6
   1   9  -6 421.425 40.8242  31
   1   9  -6 468.702 52.0812   5
  -1   9   6 457.069 66.6062  15
   1   9  -5 879.280 55.2955  31
  -1   9   5 941.800 77.7643  15
   1   9  -5 873.416 58.4510  22
  -1   9   5 1026.28 52.9866  31
   1   9  -5 1035.19 63.4240   5
  -1   9   4 130.983 33.4013  31
  -1   9   4 253.428 66.0985  15
   1   9  -4 142.444 37.2411  31
   1   9  -4 173.717 47.6774   5
   1   9  -4 129.943 40.6784  22
  -1   9   3 238.619 66.3324  15
   1   9  -3 213.981 38.7757  31
   1   9  -3 314.250 48.9486   5
  -1   9   3 249.040 35.6292  31
  -1   9   2 786.957 51.4355   5
   1   9  -2 795.207 56.3019   5
   1   9  -2 686.999 49.7948  31
  -1   9   2 754.407 75.2282  15
  -1   9   1 786.596 75.7594  15
   1   9  -1 737.657 55.7964   5
  -1   9   1 746.847 52.3416   5
   1   9  -1 759.732 50.2768  31
   1   9   0 693.310 48.8980  31
  -1   9   0 743.739 52.3286   5
   1   9   0 682.382 53.4680   5
   1   9   1 977.860 76.4985  15
   1   9   1 869.610 57.2638   5
   1   9   1 913.294 54.8126  31
  -1   9  -1 933.790 56.1042  22
  -1   9  -1 880.227 58.2837   5
  -1   9  -2 670.715 48.9521  22
   1   9   2 598.395 72.2229  15
   1   9   2 674.460 47.3931  31
  -1   9  -2 594.125 52.7552   5
   1   9   2 634.511 49.3396   5
  -1   9  -3 305.277 47.9733   5
  -1   9  -3 299.206 44.8017  16
   1   9   3 373.181 40.5210  31
   1   9   3 218.349 67.2513  15
  -1   9  -3 259.323 42.5130  22
   1   9   3 237.637 41.4932   5
  -1   9  -4 1842.26 89.8444  22
   1   9   4 1868.12 104.462  15
   1   9   4 1818.80 88.2648  31
  -1   9  -4 2039.86 92.7487   5
   1   9   5 988.970 81.6338  15
   1   9   5 1032.91 59.5577  31
  -1   9  -5 1004.36 61.8563  22
  -1   9  -5 1214.70 66.8867   5
  -1   9  -6 2397.36 113.102  22
   1   9   6 2697.76 111.111  31
  -1   9  -6 2363.60 113.287  16
   1   9   6 2532.63 124.613  15
  -1   9  -7 557.101 47.8059  22
   1   9   7 533.997 69.2247  15
  -1   9  -7 535.783 47.0747  16
  -1   9  -7 558.733 39.0794   6
  -1   9  -8 1047.36 53.8404   6
  -1   9  -8 1003.41 59.9094  22
   1   9   8 1093.65 77.9918  15
  -1   9  -8 1020.61 59.3059  16
  -1   9  -9 364.352 35.4548   6
   1   9   9 371.333 65.0680  15
  -1   9  -9 416.042 42.8955  22
  -1   9  -9 371.759 41.4467  16
  -1   9 -10 19.1966 36.1354  16
  -1   9 -10 0.95288 31.1918   6
   1   9  10 63.5850 60.8508  15
   1   9  11 223.638 61.5918  15
  -1   9 -11 161.021 32.9034   6
  -1   9 -11 212.569 34.5955  16
  -1   9 -12 524.509 40.6306  16
   1   9  12 540.540 63.2040  15
  -1   9 -12 581.548 39.9742   6
  -1   9 -13 53.4935 30.8271   6
   1   9  13 29.7622 55.4875  15
  -1   9 -13 43.8939 29.9367  16
  -1   9 -13 2.56049 33.4754  22
  -1   9 -14 744.498 44.5693   6
   1   9  14 741.862 62.1352  15
  -1   9 -14 688.858 45.3140  22
  -1   9 -14 690.179 41.3445  16
  -1   9 -15 109.122 30.8452  22
  -1   9 -15 129.657 30.8717   6
  -1   9 -15 114.293 25.4009  16
   1   9  15 124.694 51.5129  15
  -1   9 -16 72.8030 29.4676   6
  -1   9 -16 107.161 28.2179  22
   1   9  16 77.9645 47.7868  15
   1   9  17 62.4233 44.6488  15
  -1   9 -17 98.1620 28.1848   6
  -1   9 -17 41.6615 26.8126  22
  -1   9 -18 390.530 31.1891   6
   1   9  18 428.710 44.4667  15
  -1   9 -18 348.495 29.7070  22
  -1   9 -19 178.711 25.2530   6
  -1   9 -19 189.887 22.8113  22
   1   9  19 233.378 36.0572  15
  -1   9 -20 75.7721 20.9910   6
   1  10 -17 83.2918 19.4405   6
   1  10 -16 9.48995 20.6233   6
   1  10 -15 22.1707 21.7121   6
   1  10 -14 266.173 25.8320   6
  -1  10  14 300.741 41.8770  15
   1  10 -14 257.385 23.0426  16
   1  10 -13 10.2247 22.2739  16
  -1  10  13 19.6576 42.7051  15
   1  10 -13 46.5794 24.0097   6
  -1  10  12 122.890 45.5337  15
   1  10 -12 89.6278 24.8299   6
   1  10 -12 93.0562 25.8137  16
  -1  10  11 166.064 48.8198  15
   1  10 -11 128.191 25.4033   6
   1  10 -11 146.636 28.1667  16
  -1  10  10 74.1388 27.7091  16
   1  10 -10 109.506 29.8532  16
  -1  10  10 115.382 50.5836  15
   1  10 -10 105.127 24.8808   6
   1  10  -9 393.358 31.1175   6
  -1  10   9 402.013 34.8277  16
   1  10  -9 454.402 37.0184  16
  -1  10   9 395.551 56.6165  15
   1  10  -8 488.542 40.4043  16
  -1  10   8 514.294 58.2841  15
  -1  10   8 477.005 38.1439  16
   1  10  -7 447.587 41.2201  16
  -1  10   7 521.981 60.1450  15
  -1  10   7 483.873 38.8780  16
  -1  10   6 168.775 57.8148  15
   1  10  -6 139.208 36.9750  16
  -1  10   6 114.283 34.6839  16
  -1  10   5 363.096 38.7270  16
  -1  10   4 71.0390 36.1675  16
   1  10  -3 459.409 44.0486   5
  -1  10   3 361.940 41.5479  16
   1  10  -3 326.348 42.9553  16
   1  10  -2 71.3452 39.9640  16
   1  10  -2 95.0900 40.2334   5
  -1  10   2 6.97372 38.2491  16
   1  10  -1 1171.90 65.5805   5
   1  10   0 197.851 40.8934   5
  -1  10   0 222.714 43.0736  16
   1  10   1 359.435 40.4714   5
  -1  10  -1 283.968 42.9958  16
   1  10   2 787.463 46.3473  31
  -1  10  -2 750.785 52.4959  16
   1  10   3 799.364 47.3655  31
   1  10   3 912.692 72.4146  15
  -1  10  -3 863.881 53.8045  16
   1  10   4 522.367 65.9124  15
   1  10   5 420.167 61.9255  15
   1  10   6 1198.44 77.1981  15
  -1  10  -6 1133.66 61.8806  16
  -1  10  -7 62.0586 32.8346  22
   1  10   7 78.1880 56.5701  15
  -1  10  -7 95.5561 34.3619  16
  -1  10  -8 200.804 33.9821  16
  -1  10  -8 139.257 31.8753  22
   1  10   8 152.164 55.3002  15
   1  10   9 30.2742 51.4433  15
   1  10   9-3.16320 29.4197  16
  -1  10  -9 19.2134 29.8823  22
  -1  10  -9 7.26437 31.0127  16
   1  10  10 288.365 31.0902  16
   1  10  10 328.660 52.3902  15
  -1  10 -10 320.151 32.0213  16
  -1  10 -11 15.6745 26.2062  16
   1  10  11-19.2654 48.7061  15
  -1  10 -11-7.81375 23.5020   6
  -1  10 -12 290.259 26.5650   6
   1  10  12 338.612 47.7597  15
  -1  10 -12 264.522 27.0845  16
  -1  10 -13 7.90355 24.3891  22
  -1  10 -13 7.54396 22.0455   6
   1  10  13 13.2563 42.6815  15
  -1  10 -13 3.64615 21.9281  16
   1  10  14 125.766 41.2230  15
  -1  10 -14 48.1451 20.2546  16
  -1  10 -14 68.6278 23.3779  22
  -1  10 -14 73.8177 21.3277   6
   1  10  15 183.424 39.0719  15
  -1  10 -15 152.488 21.1712   6
  -1  10 -16 24.7304 18.0299   6
   1  10  16-1.87907 33.6846  15
   1  11 -11 207.291 19.5040  16
   1  11 -10 16.2715 19.1730  16
   1  11  -9 13.4680 20.9084  16
  -1  11   8 238.285 23.5373  16
   1  11  -8 205.957 25.0533  16
   1  11  -7 167.596 25.9430  16
  -1  11   7 140.274 24.4515  16
  -1  11   6 177.642 25.9019  16
   1  11  -6 167.609 27.3490  16
  -1  11   5 44.3189 25.5650  16
  -1  11   4 72.3331 26.7515  16
  -1  11   3 295.716 30.9050  16
   1  11  -3 288.384 31.2736  16
  -1  11   2 128.587 28.7930  16
   1  11  -2 129.390 29.6666  16
   1  11  -1 20.2648 29.0570  16
  -1  11   1 53.5635 28.8617  16
   1  11   0 11.0840 29.0324  16
  -1  11   0 37.1374 28.7215  16
   1  11   1 74.1918 29.7909  16
  -1  11  -1 119.040 29.1066  16
   1  11   2 233.707 31.0014  16
  -1  11  -2 266.567 30.9977  16
   1  11   3 900.457 48.9693  16
  -1  11  -3 980.195 49.5241  16
   1  11   4 224.072 29.4115  16
   1  11   5 111.474 26.8747  16
   1  11   6 191.041 26.8895  16
  -1  11  -6 275.324 28.3976  16
   1  11   7-16.7393 24.2152  16
  -1  11  -7 74.5063 24.1700  16
  -1  11  -8 654.552 33.6632  16
   1  11   8 498.221 33.0362  16
  -1  11  -9-0.55577 20.3948  16
  -1  11 -10 14.8575 18.8744  16
  -2 -11  11 2.44904 13.8311   9
  -2 -11  11 19.1100 16.0460  35
  -2 -11  11 20.7437 16.6327   8
  -2 -11  10 60.2242 17.7949   8
  -2 -11  10 45.3622 15.1125   9
  -2 -11  10 61.8952 17.6440  35
  -2 -11   9 40.9175 18.1075   8
  -2 -11   9 29.5600 15.8529   9
  -2 -11   9 28.8818 18.5730  35
  -2 -11   8 36.5103 16.3589   9
  -2 -11   8 19.6714 18.6892   8
  -2 -11   7 207.109 19.5900   9
  -2 -11   6 174.485 21.9915  35
  -2 -11   6 160.155 19.0577   9
  -2 -11   5 164.981 22.6649  35
  -2 -11   5 176.576 19.6551   9
  -2 -11   4 213.457 20.4056   9
  -2 -11   4 195.194 23.3488  35
  -2 -11   3 151.208 19.4621   9
  -2 -11   3 163.032 22.9607  35
  -2 -11   2 48.7431 18.2945   9
  -2 -11   2 16.0865 21.0659  35
   2 -11  -2 20.4948 18.1489  35
  -2 -11   1 228.051 23.6460  35
   2 -11  -1 217.163 22.1195  35
  -2 -11   1 253.322 21.2269   9
   2 -11   0 85.3172 20.1304  35
  -2 -11   0 84.1605 21.5035  35
  -2 -11  -1 471.596 30.0622  35
   2 -11   1 508.185 29.9583  35
   2 -11   2 376.792 26.9414  35
   2 -11   3 20.6165 16.4916   8
   2 -11   3 29.5930 20.7907  35
   2 -11   4 330.211 21.9914   8
   2 -11   4 300.436 25.2877  35
   2 -11   5 439.135 28.5240  35
   2 -11   5 447.957 25.6755   8
   2 -11   6 235.655 20.1356   8
   2 -11   6 252.784 23.0557  35
   2 -11   7 358.710 25.5814  35
   2 -11   7 371.633 23.4260   8
   2 -11   8 63.5603 16.6920   8
   2 -11   8 66.7305 18.9297  35
   2 -11   9 64.2395 16.0655   8
   2 -11  10 13.3612 15.3117   8
  -2 -10  17 209.363 21.1282   8
  -2 -10  17 245.617 19.9413   9
  -2 -10  16 27.9491 18.4060   9
  -2 -10  16 39.8178 18.0419  35
  -2 -10  15 268.793 22.8924   9
  -2 -10  15 237.340 22.7340  35
  -2 -10  14 81.7975 21.3258   9
  -2 -10  14 95.9149 21.3988  35
  -2 -10  13 195.856 23.8709   9
  -2 -10  13 186.882 23.9209  35
  -2 -10  12 655.235 35.6034   9
  -2 -10  12 567.618 35.6327  35
  -2 -10  11 235.681 26.8455   9
  -2 -10  10 480.208 33.4253   9
  -2 -10   9 200.501 27.4240   9
  -2 -10   8 433.383 35.6253  35
  -2 -10   8 511.859 34.2660   9
  -2 -10   7 74.2337 27.4420   9
  -2 -10   6 594.548 37.8875   9
  -2 -10   5 305.747 30.5646   9
   2 -10  -5 233.984 25.2744  35
   2 -10  -4 75.1176 23.4591  35
  -2 -10   4 95.5973 27.8640   9
  -2 -10   4 51.4856 28.9867  35
  -2 -10   3 326.345 31.1680   9
   2 -10  -3 263.739 27.9537  35
  -2 -10   3 247.052 32.5038  35
   2 -10  -2 135.255 27.2232  35
  -2 -10   2 163.057 30.0892  35
  -2 -10   2 158.285 28.6979   9
   2 -10  -1 406.688 32.3270  35
  -2 -10   1 415.728 35.2897  35
  -2 -10   1 392.356 33.3969   9
  -2 -10   0 628.680 39.7103   9
  -2 -10   0 666.210 40.5540  35
   2 -10   0 622.238 39.3138  35
  -2 -10  -1 1442.70 65.0691  35
  -2 -10  -1 1312.50 64.2098   9
  -2 -10  -2 295.231 30.2066   9
  -2 -10  -2 231.738 29.5403  35
  -2 -10  -3 230.461 28.0091   9
  -2 -10  -3 204.535 28.0856  35
  -2 -10  -4 156.801 26.9676   9
  -2 -10  -4 205.757 26.6839  35
  -2 -10  -5 411.293 31.1374   9
  -2 -10  -6 255.690 27.7185   9
  -2 -10  -7 1664.72 76.0575   9
   2 -10   7 1809.29 76.9774   8
  -2 -10  -8 12.4577 22.7029   9
   2 -10   8 56.5867 24.6637   8
   2 -10   9 81.4325 20.3199   9
   2 -10   9 93.8378 25.1876   8
   2 -10  10 37.1791 19.0493   9
   2 -10  10 28.4605 23.8506   8
   2 -10  11 130.416 19.6682   9
   2 -10  11 148.104 24.8487   8
   2 -10  12-2.94685 22.1531   8
   2 -10  12-1.71719 17.9848   9
   2 -10  13 87.0831 22.3639   8
   2 -10  13 89.3695 17.4036   9
   2 -10  14 210.254 22.8017   8
   2 -10  15 41.5817 19.5117   8
   2 -10  16 200.478 19.7946   8
  -2  -9  21 203.701 20.7234   8
  -2  -9  21 207.720 21.0458   9
  -2  -9  20 84.3016 21.5092   9
  -2  -9  20 40.8568 21.1985   8
  -2  -9  20 67.9194 25.3752  23
  -2  -9  19-13.1588 18.0613  35
  -2  -9  19 0.36209 22.5935   8
  -2  -9  19 10.3829 28.2957  23
  -2  -9  19 44.2684 22.7466   9
  -2  -9  18 82.3298 24.3990   8
  -2  -9  18 43.7623 29.4867  23
  -2  -9  18 29.0208 24.5906   9
  -2  -9  17 24.9617 30.9692  23
  -2  -9  17 0.42439 25.4577   8
  -2  -9  17 19.1207 25.4659   9
  -2  -9  16 39.4117 26.4038   8
  -2  -9  16-11.8350 26.9234   9
  -2  -9  16-6.14327 32.1922  23
  -2  -9  15 111.764 28.3502   8
  -2  -9  15 139.475 28.5055   9
  -2  -9  15 122.621 34.3446  23
  -2  -9  14 197.615 30.7337   8
  -2  -9  14 196.270 30.0195   9
  -2  -9  14 170.237 35.2290  23
  -2  -9  13 69.0599 30.5253   9
  -2  -9  13 100.017 35.3244  23
  -2  -9  12 343.125 34.6111   9
  -2  -9  12 293.304 38.7603  23
  -2  -9  12 361.236 32.5519  10
  -2  -9  11 584.038 39.4561   9
  -2  -9  11 472.739 42.5362  23
  -2  -9  11 519.672 37.4048  10
  -2  -9  10 218.407 31.0326  10
  -2  -9  10 233.108 33.4281   9
  -2  -9  10 241.837 36.7386  23
  -2  -9   9 235.636 36.4657  23
  -2  -9   9 254.311 34.3025   9
  -2  -9   9 202.468 30.8941  10
  -2  -9   8 109.808 32.1204   9
  -2  -9   8 64.7398 34.1922  23
  -2  -9   8 93.2198 28.8371  10
  -2  -9   7 287.355 32.0255  10
  -2  -9   7 231.275 36.4690  23
   2  -9  -7 278.786 27.3131  35
  -2  -9   7 282.542 34.7360   9
  -2  -9   6 226.600 34.1205   9
  -2  -9   6 130.990 30.1091  10
   2  -9  -6 193.870 26.6532  35
  -2  -9   6 218.251 35.9208  23
   2  -9  -5 978.328 48.7081  35
  -2  -9   5 942.284 52.4182   9
  -2  -9   5 890.987 49.7515  10
   2  -9  -4 1172.84 55.1975  35
  -2  -9   4 971.342 54.8808  10
  -2  -9   4 1112.01 57.6782   9
  -2  -9   3 2988.57 128.555   9
  -2  -9   2 380.189 37.8812   9
  -2  -9   1 791.495 46.0260   9
  -2  -9   1 636.228 46.0095  35
  -2  -9   0 748.613 47.3456   9
  -2  -9   0 825.948 48.1558  35
  -2  -9  -1 1037.24 54.0901  35
  -2  -9  -1 990.296 54.1653   9
   2  -9   1 965.721 49.9349   9
   2  -9   2 70.9451 26.8139   9
  -2  -9  -2 93.7214 30.9735  35
  -2  -9  -2 56.0976 31.8057   9
  -2  -9  -3 83.4177 31.3797  35
   2  -9   3 125.207 27.4123   9
  -2  -9  -3 117.587 32.2969   9
   2  -9   4 1491.46 69.7836   9
  -2  -9  -4 1605.01 71.3442  35
  -2  -9  -4 1427.47 72.1602   9
   2  -9   5 3372.85 147.294   9
  -2  -9  -5 3343.63 148.446   9
  -2  -9  -5 3802.79 148.056  35
  -2  -9  -6 228.686 29.3917  35
   2  -9   6 190.261 29.4282   9
  -2  -9  -6 199.151 32.8223   9
  -2  -9  -7 433.148 32.1707  35
  -2  -9  -7 352.331 34.8978   9
   2  -9   7 344.310 32.3489   9
  -2  -9  -8 266.263 32.0108   9
   2  -9   8 234.794 29.6097   9
   2  -9   9 353.998 31.8142   9
   2  -9  10 566.451 38.9595   8
   2  -9  10 543.566 36.0089   9
   2  -9  11-16.6550 26.4883   9
   2  -9  11 27.0358 29.3725   8
   2  -9  12 794.835 45.8942   8
   2  -9  12 781.569 42.7804   9
   2  -9  13 295.586 28.8914   9
   2  -9  13 274.663 32.1325   8
   2  -9  14 931.625 47.4482   9
   2  -9  14 978.317 49.9979   8
   2  -9  15 180.606 28.6045   8
   2  -9  15 138.546 24.6071   9
   2  -9  16 42.5937 22.4051   9
   2  -9  17 14.7286 21.3082   9
   2  -9  18 493.922 28.9926   9
   2  -9  19 13.1384 16.8113   9
   2  -9  20 41.7825 14.1755   4
   2  -9  20 46.0422 17.5359   8
  -2  -8  24 123.393 18.3132  19
  -2  -8  24 114.326 23.8949  23
  -2  -8  24 132.831 17.1552   8
  -2  -8  24 139.312 19.7593   9
  -2  -8  23 46.3510 27.0439  23
  -2  -8  23 110.887 22.1939   9
  -2  -8  23 61.3168 19.8974   8
  -2  -8  22 80.5812 25.0535   9
  -2  -8  22 24.8589 31.1285  23
  -2  -8  22 35.4095 22.7096   8
  -2  -8  21 93.0167 34.8048  23
  -2  -8  21 98.8076 26.0135   8
  -2  -8  21 157.385 27.8322   9
  -2  -8  20 78.7629 28.3638   9
  -2  -8  20 41.2413 35.9985  23
  -2  -8  20 44.7600 27.0206   8
  -2  -8  19 30.5012 27.7103   8
  -2  -8  19-6.75166 29.2788   9
  -2  -8  19-15.0687 36.9479  23
  -2  -8  18 105.379 39.2348  23
  -2  -8  18 115.290 31.2683   9
  -2  -8  18 111.787 30.5508   8
  -2  -8  17 231.439 43.4755  23
  -2  -8  17 324.626 34.9503   8
  -2  -8  17 334.285 35.4564   9
  -2  -8  16 465.846 38.8051   8
  -2  -8  16 476.207 39.3738   9
  -2  -8  16 450.122 46.7503  23
  -2  -8  15 178.444 33.6538  10
  -2  -8  15 104.761 33.2703   9
  -2  -8  15 67.6811 42.4258  23
  -2  -8  14 1212.64 61.6444  10
  -2  -8  14 1199.31 62.2173   9
  -2  -8  14 1237.56 68.0622  23
  -2  -8  13 81.2323 42.7071  23
  -2  -8  13 41.1487 33.2084  10
  -2  -8  13 52.2669 33.5468   9
  -2  -8  12 279.153 37.2603   9
  -2  -8  12 225.119 44.5612  23
  -2  -8  12 245.776 34.7055  10
  -2  -8  11 1627.55 78.3894  10
  -2  -8  11 1721.81 79.2775   9
  -2  -8  11 1706.71 84.2136  23
  -2  -8  10 226.348 35.2281  10
  -2  -8  10 218.116 43.4777  23
  -2  -8  10 310.949 36.1236   9
  -2  -8   9 571.200 49.5986  23
  -2  -8   9 537.130 42.6286   9
  -2  -8   9 617.085 41.6709  10
  -2  -8   8 288.681 36.8956   9
   2  -8  -8 290.108 27.4921  35
  -2  -8   8 261.863 34.8966  10
  -2  -8   8 317.492 43.0336  23
  -2  -8   7 130.870 32.3835  10
   2  -8  -7 126.631 25.9088  35
  -2  -8   7 122.849 33.9439   9
  -2  -8   7 121.809 39.9558  23
  -2  -8   6 530.366 41.7291  10
   2  -8  -6 635.403 37.8634  35
  -2  -8   6 643.582 43.9755   9
  -2  -8   6 632.077 47.5874  23
  -2  -8   5 59.9141 38.3517  23
  -2  -8   5 52.3256 31.6518  10
  -2  -8   5 25.2531 33.8354   9
  -2  -8   4 637.693 46.4233  23
  -2  -8   4 623.839 43.5406   9
  -2  -8   4 602.202 41.7258  10
  -2  -8   3 63.2969 35.7315  23
   2  -8  -3 55.5647 26.9508   9
  -2  -8   3 12.4600 30.0634  10
  -2  -8   3 63.6585 33.0339   9
  -2  -8   2 933.671 52.6151   9
  -2  -8   2 855.046 50.4831  10
  -2  -8   2 973.027 53.9230  23
   2  -8  -2 932.789 48.4580   9
  -2  -8   1 227.006 32.5133  10
   2  -8  -1 204.261 29.5825   9
  -2  -8   1 196.569 35.4334   9
  -2  -8   0 312.465 34.9384  10
  -2  -8   0 375.717 37.1928   9
   2  -8   0 391.565 32.7329   9
  -2  -8  -1 1029.18 57.8207  10
  -2  -8  -1 1170.09 59.6148   9
   2  -8   1 1198.18 56.2099   9
  -2  -8  -2 3320.20 136.525   9
  -2  -8  -2 3453.26 136.209  35
   2  -8   2 3215.42 134.656   9
  -2  -8  -3 3170.70 139.483  10
   2  -8   3 3245.80 139.303   9
  -2  -8  -3 3485.46 140.380  35
   2  -8   4 1787.23 83.4184   9
  -2  -8  -4 1925.30 84.3360  35
   2  -8   5 2319.88 104.899   9
  -2  -8  -5 2521.07 105.358  35
  -2  -8  -6 625.549 39.3997  35
   2  -8   6 536.562 39.5315   9
  -2  -8  -7 1598.76 73.9306  35
   2  -8   7 1649.46 74.9642   9
   2  -8   8 822.132 48.6775   9
   2  -8   8 784.494 53.5356  23
   2  -8   9 1744.90 77.3944   9
   2  -8   9 1595.25 81.5683  23
   2  -8  10 179.367 40.1075  23
   2  -8  10 194.140 32.2884   9
   2  -8  11 1918.55 84.9958   9
   2  -8  11 1835.81 89.5661  23
   2  -8  12-19.6290 30.8212   9
   2  -8  12 68.8742 39.4601  23
   2  -8  12-5.75947 32.3103   8
   2  -8  13 2086.94 88.4471   9
   2  -8  13 1812.01 92.9622  23
   2  -8  14 44.5156 29.6874   9
   2  -8  14 9.35780 39.7641  23
   2  -8  15 455.452 47.0389  23
   2  -8  15 551.052 37.6252   9
   2  -8  16 340.194 43.8977  23
   2  -8  16 356.995 33.0359   9
   2  -8  17 160.638 29.4791   9
   2  -8  17 170.520 40.2272  23
   2  -8  18 38.4858 27.2464   9
   2  -8  18 4.95446 37.6356  23
   2  -8  18 53.5996 29.7960   8
   2  -8  19-7.80392 34.7905  23
   2  -8  19 48.0025 26.1179   9
   2  -8  19 36.3841 28.5061   8
   2  -8  20 231.721 33.3799  23
   2  -8  20 288.101 28.1780   8
   2  -8  20 281.845 23.5792  19
   2  -8  20 249.220 26.6974   9
   2  -8  21 163.523 23.2690   9
   2  -8  21 200.710 20.1105  19
   2  -8  21 197.998 24.4059   8
   2  -8  21 160.277 29.4290  23
   2  -8  22 199.363 26.8799  23
   2  -8  22 204.356 19.0014  19
   2  -8  22 282.821 23.1574   8
   2  -8  22 271.030 19.3208   4
   2  -8  23 240.763 20.2048   8
  -2  -7  26 279.104 23.3052  19
  -2  -7  26 234.572 19.8982   8
  -2  -7  25 32.1081 19.1425   8
  -2  -7  25 76.9524 23.6081  19
  -2  -7  24 65.2794 22.2930   8
  -2  -7  23 164.832 26.2209   8
  -2  -7  22 104.644 42.6584  23
  -2  -7  22 25.6730 28.2281   8
  -2  -7  21 67.5680 43.1612  23
  -2  -7  21 88.6103 29.9608   8
  -2  -7  20 19.8348 44.9052  23
  -2  -7  20 45.7523 29.9827   8
  -2  -7  19 173.899 48.0543  23
  -2  -7  19 201.592 32.4479   8
  -2  -7  18 90.3173 31.8333   8
  -2  -7  18 36.6457 49.6660  23
  -2  -7  17-26.8261 31.5812   8
  -2  -7  17 32.1081 48.6444  23
  -2  -7  16 804.653 62.1062  23
  -2  -7  16 793.118 50.3091   9
  -2  -7  16 869.866 50.9199  10
  -2  -7  15 512.601 55.0631  23
  -2  -7  15 572.042 42.2914   9
  -2  -7  15 502.919 43.4050  10
  -2  -7  14 240.508 36.4863   9
  -2  -7  14 254.031 37.4922  10
  -2  -7  14 280.857 50.8531  23
  -2  -7  13 696.175 45.7440   9
  -2  -7  13 584.278 56.7937  23
  -2  -7  13 742.759 46.6905  10
  -2  -7  12 218.613 47.7694  23
  -2  -7  12 220.894 35.2146   9
  -2  -7  12 212.141 36.0077  10
  -2  -7  11 1136.63 59.8694   9
  -2  -7  11 1126.33 67.8958  23
  -2  -7  11 1207.60 60.1012  10
  -2  -7  10 119.707 33.0202  10
  -2  -7  10 148.419 33.2061   9
  -2  -7  10 141.970 41.6915  23
  -2  -7   9 935.184 51.9864  10
  -2  -7   9 974.274 52.0939   9
  -2  -7   9 949.820 58.6905  23
  -2  -7   8 660.934 50.4740  23
  -2  -7   8 644.621 42.7176  10
  -2  -7   8 695.161 42.6964   9
   2  -7  -8 621.664 36.2476  35
  -2  -7   7 1531.00 72.7819  10
  -2  -7   7 1591.90 77.0684  23
  -2  -7   7 1582.02 73.0495   9
  -2  -7   6 928.726 53.9356  23
  -2  -7   6 830.839 47.7870  10
  -2  -7   6 888.815 48.6706   9
  -2  -7   5 1.53127 29.5351   9
  -2  -7   5 58.6109 36.0271  23
  -2  -7   5 19.7287 28.8762  10
  -2  -7   4 1462.92 68.2692   9
  -2  -7   4 1390.11 67.2520  10
   2  -7  -4 1331.59 65.3362   9
  -2  -7   3 2531.06 113.417   9
  -2  -7   3 2895.71 115.054  23
   2  -7  -3 2572.09 111.756   9
  -2  -7   3 2624.15 113.040  10
   2  -7  -2 402.170 31.7921   9
  -2  -7   2 448.477 36.4292   9
  -2  -7   2 442.807 35.0160  10
   2  -7  -1 1389.38 65.3276   9
  -2  -7   1 1381.33 67.6737   9
  -2  -7   1 1411.29 66.9171  10
  -2  -7   1 1620.84 69.0439  23
   2  -7   0 1408.05 67.3110   9
  -2  -7   0 1371.99 68.4831  10
  -2  -7  -1 591.478 39.1840  10
   2  -7   1 647.000 37.5799   9
  -2  -7  -2 2889.45 125.729  10
   2  -7   2 3013.97 125.004   9
  -2  -7  -3 1830.28 83.0462  10
   2  -7   3 1901.90 82.4615   9
  -2  -7  -4 413.032 34.5912  10
   2  -7   4 459.900 37.3320  23
   2  -7   4 442.444 32.7795   9
  -2  -7  -4 473.739 33.9393  35
   2  -7   5 839.666 46.2652   9
   2  -7   5 919.358 50.6697  23
  -2  -7  -5 804.795 47.4845  10
  -2  -7  -5 972.302 46.4666  35
  -2  -7  -6 125.010 30.1916  10
  -2  -7  -6 212.395 27.3662  35
   2  -7   6 179.994 28.4789   9
   2  -7   6 179.647 35.8889  23
   2  -7   7 2719.01 113.981   9
   2  -7   7 2610.37 117.060  23
  -2  -7  -7 2423.72 114.261  10
  -2  -7  -7 2843.24 113.380  35
  -2  -7  -8 54.9442 30.0839  10
  -2  -7  -8 103.014 26.0974  35
   2  -7   8 93.6731 28.3704   9
   2  -7   8 125.446 39.5222  23
   2  -7   9 1290.20 70.3670  23
  -2  -7  -9 1218.24 64.5369  10
  -2  -7  -9 1496.87 62.6163  35
   2  -7   9 1366.02 63.8243   9
   2  -7   9 1264.51 63.0379  10
   2  -7  10 207.365 44.1386  23
  -2  -7 -10 162.044 33.6230  10
   2  -7  10 193.980 30.7423  10
   2  -7  10 190.798 32.0948   9
   2  -7  11 4735.93 190.908  10
   2  -7  11 4521.85 195.270  23
  -2  -7 -11 4307.98 191.345  10
   2  -7  11 4725.08 191.222   9
   2  -7  12 550.553 38.9274   9
  -2  -7 -12 450.605 39.6998  10
   2  -7  12 522.658 51.2987  23
   2  -7  13 244.072 32.9648   9
   2  -7  13 216.519 46.8826  23
  -2  -7 -13 178.103 33.7075  10
   2  -7  14 219.507 33.7712   9
  -2  -7 -14 177.774 34.4905  10
   2  -7  14 265.457 47.8861  23
   2  -7  15 140.412 32.9279   9
   2  -7  15 134.437 48.0492  23
   2  -7  16 680.453 45.1505   8
   2  -7  16 654.883 43.7635   9
   2  -7  16 550.881 56.9262  23
   2  -7  17 656.459 42.8570   9
   2  -7  17 682.777 44.7545   8
   2  -7  18 139.613 34.0258   8
   2  -7  18 164.884 32.5447   9
   2  -7  18 117.852 46.8974  23
   2  -7  19 199.248 34.4717   8
   2  -7  19 193.309 32.9143   9
   2  -7  19 133.850 48.0334  23
   2  -7  20 534.653 51.9119  23
   2  -7  20 577.769 41.2601   8
   2  -7  20 645.731 40.6088   9
   2  -7  21 307.239 32.0829   8
   2  -7  21 223.673 42.3541  23
   2  -7  21 305.764 31.7723   9
   2  -7  21 309.080 27.3329   4
   2  -7  22 864.239 45.5164  19
   2  -7  22 999.770 44.3012   4
   2  -7  22 928.087 46.9245   9
   2  -7  22 892.750 46.5765   8
   2  -7  23 90.1202 23.6756   8
   2  -7  23 33.0109 21.9105  19
   2  -7  23 57.5763 19.3389   4
   2  -7  23 48.4747 23.8142   9
   2  -7  23 44.1077 32.1576  23
   2  -7  24 37.4682 20.4473   8
   2  -7  24 50.3150 18.9672  19
   2  -7  24 30.4215 28.0106  23
   2  -7  25 18.4649 16.5901  19
   2  -7  25 28.2047 23.6982  23
  -2  -6  28 449.583 33.3994  23
  -2  -6  28 521.900 30.0248  19
  -2  -6  27 51.4882 23.9246  19
  -2  -6  27 46.4302 30.4891  23
  -2  -6  26 212.480 28.2817  19
  -2  -6  26 212.833 21.9657   8
  -2  -6  26 168.658 36.1775  23
  -2  -6  26 166.262 27.3791   9
  -2  -6  25 76.4444 28.4952   9
  -2  -6  25 20.8908 40.2870  23
  -2  -6  25 68.9356 23.2536   8
  -2  -6  24 49.7555 32.1612   9
  -2  -6  24 63.1694 25.6585   8
  -2  -6  24 35.4564 43.3008  23
  -2  -6  23 97.6831 47.4909  23
  -2  -6  23 99.5529 34.3269   9
  -2  -6  23 114.098 28.9778   8
  -2  -6  22 784.926 45.9538   8
  -2  -6  21 121.675 31.4014   8
  -2  -6  20 743.677 45.0189   8
  -2  -6  19 439.529 36.5178   8
  -2  -6  18 195.866 32.4891   8
  -2  -6  17 1843.53 85.3151   8
  -2  -6  17 1937.90 88.1114  10
  -2  -6  16 115.950 37.5667  10
  -2  -6  16 126.149 54.8359  23
  -2  -6  15 2586.72 114.039  10
  -2  -6  15 2616.78 120.395  23
  -2  -6  14 64.6856 49.1940  23
  -2  -6  14 59.8076 33.2010  10
  -2  -6  13 518.421 39.3622  10
  -2  -6  13 535.477 52.5506  23
  -2  -6  12 93.9880 44.6747  23
  -2  -6  12 97.4588 30.3546   9
  -2  -6  12 14.6781 30.5405  10
  -2  -6  11 535.134 37.0528   9
  -2  -6  11 520.169 49.1954  23
  -2  -6  11 545.392 37.9462  10
  -2  -6  10 616.943 48.3348  23
  -2  -6  10 570.390 38.3413  10
  -2  -6  10 607.433 38.6740   9
  -2  -6   9 193.193 39.3961  23
  -2  -6   9 222.327 28.7012   9
  -2  -6   9 140.967 29.3078  10
  -2  -6   8 957.895 50.5737   9
  -2  -6   8 1025.14 50.7755  10
  -2  -6   8 1016.40 57.2252  23
  -2  -6   7 722.011 47.0760  23
  -2  -6   7 743.615 40.3291   9
  -2  -6   7 646.834 40.4452  10
  -2  -6   6 2931.27 119.901  23
  -2  -6   6 2749.37 117.335  10
  -2  -6   6 2659.04 117.175   9
  -2  -6   5 98.5639 26.3936  10
  -2  -6   5 103.731 25.9922   9
  -2  -6   5 59.5164 32.6178  23
  -2  -6   4 3113.22 135.689   9
  -2  -6   4 3110.42 135.555  10
  -2  -6   3 1295.03 62.6559  10
  -2  -6   3 1313.33 62.6131   9
   2  -6  -2 1720.17 92.2109   1
  -2  -6   2 1768.97 82.2636  10
  -2  -6   1 741.370 41.3060  10
  -2  -6   1 829.199 43.7266  23
   2  -6  -1 696.082 53.4388   1
  -2  -6   0 179.562 28.4434  23
   2  -6   0 167.058 41.8539   1
  -2  -6   0 143.845 26.0868  10
  -2  -6   0 175.581 39.7211   1
  -2  -6  -1 646.683 39.9293  10
  -2  -6  -1 766.394 41.2676  23
   2  -6   1 698.500 37.2259   9
  -2  -6  -1 758.315 50.5714   1
  -2  -6  -2 4716.33 200.817  10
   2  -6   2 4984.37 200.239   9
  -2  -6  -2 4862.39 207.682   1
  -2  -6  -3 2429.32 108.580  10
   2  -6   3 2670.31 109.131  23
   2  -6   3 2562.67 107.767   9
   2  -6   4 926.192 49.2517  23
  -2  -6  -4 877.438 47.2192  10
   2  -6   4 924.423 45.0199   9
  -2  -6  -5 1214.38 61.7774  10
   2  -6   5 1416.72 60.5085   9
   2  -6   5 1276.82 64.3814  23
  -2  -6  -5 1369.98 60.0566  35
   2  -6   6 537.071 33.2614   9
   2  -6   6 583.467 41.1531  23
  -2  -6  -6 574.071 32.6967  35
  -2  -6  -6 477.286 36.0955  10
   2  -6   7 2890.74 122.737   9
   2  -6   7 2738.60 122.422  10
  -2  -6  -7 3144.79 122.391  35
   2  -6   7 2863.07 126.018  23
  -2  -6  -8 567.089 32.0946  35
   2  -6   8 468.554 34.1714  10
   2  -6   8 496.178 43.9788  23
   2  -6   8 455.430 34.1091   9
   2  -6   9 2452.69 113.340  23
   2  -6   9 2384.08 108.525   9
   2  -6   9 2459.17 108.343  10
  -2  -6  -9 2796.66 107.762  35
   2  -6  10 369.936 31.1518  10
   2  -6  10 306.656 30.5769   9
   2  -6  10 365.697 43.4426  23
   2  -6  11 482.557 35.1152  10
   2  -6  11 458.113 34.2707   9
   2  -6  11 467.845 47.7416  23
   2  -6  12 947.840 48.6993  10
   2  -6  12 850.092 60.1252  23
   2  -6  12 863.209 47.9418   9
   2  -6  13 469.667 52.5742  23
   2  -6  13 580.097 38.7782   9
   2  -6  14 677.088 43.4288   9
   2  -6  14 695.837 43.5115   8
   2  -6  14 677.272 56.6158  23
   2  -6  15 189.697 33.5012   8
   2  -6  15 240.648 33.7024   9
   2  -6  15 192.846 50.6690  23
   2  -6  16-27.5333 32.3976   9
   2  -6  16 14.2570 32.1240   8
   2  -6  16 4.15188 52.3367  23
   2  -6  17 615.241 61.5424  23
   2  -6  17 697.617 45.3420   9
   2  -6  17 736.770 45.0627   8
   2  -6  18 743.090 46.1746   9
   2  -6  18 674.105 46.2476   8
   2  -6  18 673.753 61.8801  23
   2  -6  19 804.612 66.6664  23
   2  -6  19 967.388 52.9565   9
   2  -6  19 891.451 52.9396   8
   2  -6  20 1115.44 58.8154   9
   2  -6  20 1170.23 59.2202   8
   2  -6  20 982.081 72.8310  23
   2  -6  21 49.6396 33.4677   9
   2  -6  21 34.5915 32.2787   8
   2  -6  21 20.7700 50.1469  23
   2  -6  22 552.003 56.3171  23
   2  -6  22 672.437 42.9736   9
   2  -6  22 683.551 42.0952   8
   2  -6  22 677.437 38.7074   4
   2  -6  23 202.219 31.2985   9
   2  -6  23 237.343 29.8410   8
   2  -6  23 182.266 43.3097  23
   2  -6  23 241.128 25.9586   4
   2  -6  23 239.736 30.0018  19
   2  -6  24 34.8998 37.9867  23
   2  -6  24 30.4134 25.8666  19
   2  -6  24-3.49942 20.9072   4
   2  -6  24-4.01546 24.6861   8
   2  -6  25 188.880 23.9453   8
   2  -6  25 214.113 25.3699  19
   2  -6  26 137.051 22.2022  19
   2  -6  27 145.887 19.5406  19
  -2  -5  29 92.5130 28.5383  23
  -2  -5  28 308.626 36.1579  23
  -2  -5  28 266.973 26.0340  33
  -2  -5  27 164.903 39.3175  23
  -2  -5  27 96.0922 26.1704  33
  -2  -5  26 356.983 47.7096  23
  -2  -5  26 309.853 34.1881  33
  -2  -5  26 403.154 28.8472   8
  -2  -5  25 5.41443 31.2745  33
  -2  -5  25 0.85384 24.7641   8
  -2  -5  25 26.0810 32.8053   9
  -2  -5  25 0.78896 48.4677  23
  -2  -5  24 896.185 46.3260   8
  -2  -5  24 852.941 51.4757   9
  -2  -5  24 811.805 64.3139  23
  -2  -5  24 789.754 51.2244  33
  -2  -5  23 101.215 54.0882  23
  -2  -5  23 50.2179 36.1456   9
  -2  -5  23 72.7276 29.4374   8
  -2  -5  23 54.5630 34.7051  33
  -2  -5  22 438.163 37.1420   8
  -2  -5  22 381.808 40.6837  33
  -2  -5  22 520.748 41.7193   9
  -2  -5  22 469.970 60.2822  23
  -2  -5  21 470.510 61.2144  23
  -2  -5  21 480.286 38.9292  11
  -2  -5  21 482.416 42.3235  33
  -2  -5  21 536.170 37.9498   8
  -2  -5  21 554.812 41.7965   9
  -2  -5  20 157.491 36.1211  33
  -2  -5  20 252.919 32.4144  11
  -2  -5  20 253.255 32.3744   8
  -2  -5  20 275.502 35.5649   9
  -2  -5  20 202.692 57.7449  23
  -2  -5  19 196.915 34.6169   9
  -2  -5  19 143.840 35.2900  33
  -2  -5  19 194.882 56.1716  23
  -2  -5  19 206.112 30.8562   8
  -2  -5  19 204.059 30.2565  11
  -2  -5  18 89.9772 32.7927   9
  -2  -5  18 95.3143 53.8437  23
  -2  -5  18 20.7180 28.3852   8
  -2  -5  18 24.3256 28.2887  11
  -2  -5  18 39.0944 32.3541  33
  -2  -5  17 75.0375 28.0631   8
  -2  -5  17 106.468 30.9135   9
  -2  -5  17 130.172 35.3727  10
  -2  -5  17 42.9950 31.0751  33
  -2  -5  16 327.504 36.2803  10
  -2  -5  16 248.609 33.2383  33
  -2  -5  15 1452.83 68.6661  10
  -2  -5  15 1431.42 67.5087  33
  -2  -5  14 1078.37 53.3885  10
  -2  -5  14 924.208 51.2096  33
  -2  -5  14 1081.66 57.1584  14
  -2  -5  13 174.481 33.2248  14
  -2  -5  13 220.658 26.9872  33
  -2  -5  13 179.911 30.0509  10
  -2  -5  12 3589.29 146.750  14
  -2  -5  12 3406.08 148.655  23
  -2  -5  12 3259.92 143.958  33
  -2  -5  12 3579.66 144.813  10
  -2  -5  11 700.460 40.7775  14
  -2  -5  11 664.379 48.1560  23
  -2  -5  11 620.025 39.2412  10
  -2  -5  10 1376.16 64.3509  10
   2  -5 -10 1507.82 86.8357  24
  -2  -5  10 1408.30 70.5198  23
  -2  -5   9 4468.44 177.684  23
   2  -5  -9 3991.77 184.912   2
  -2  -5   9 4200.50 174.684  10
   2  -5  -9 3916.12 180.853  21
   2  -5  -9 4486.57 189.799  24
  -2  -5   8 4911.67 198.339   9
   2  -5  -8 5048.05 214.285  24
   2  -5  -8 4438.67 203.246  20
  -2  -5   8 4884.92 200.790  23
   2  -5  -8 4773.21 209.295   2
  -2  -5   8 4780.13 198.356  10
  -2  -5   7 647.773 81.7013  24
  -2  -5   7 611.733 42.2133  23
  -2  -5   7 568.370 34.6347   9
   2  -5  -7 578.198 38.8049  20
   2  -5  -7 696.783 69.7908  24
   2  -5  -7 602.742 51.9013   2
  -2  -5   6 246.497 77.0243  24
   2  -5  -6 139.289 43.5380   2
   2  -5  -6 92.6923 26.5304  20
   2  -5  -6 157.000 27.0387   1
  -2  -5   6 219.181 66.7152  25
  -2  -5   6 198.566 33.3861  23
   2  -5  -6 124.185 66.9755  24
  -2  -5   6 115.139 44.9528   1
  -2  -5   5 168.966 31.0705  23
  -2  -5   5 219.150 74.6468  24
  -2  -5   5 206.630 42.9959  21
   2  -5  -5 166.848 25.5204  20
   2  -5  -5 186.582 67.9036  24
   2  -5  -5 140.841 29.6847   1
  -2  -5   5 291.814 45.4154   1
   2  -5  -5 109.559 41.4092   2
  -2  -5   5 189.891 31.3376  20
  -2  -5   4 1944.69 91.9532   1
   2  -5  -4 1657.87 89.8616   2
  -2  -5   4 1909.27 91.9548  21
   2  -5  -4 1813.81 79.7368  20
  -2  -5   4 1838.12 80.5718  23
   2  -5  -4 1817.32 107.672  24
   2  -5  -4 1769.13 83.8195   1
  -2  -5   4 1711.60 84.2691  20
  -2  -5   4 1857.38 110.013  24
  -2  -5   3 384.793 31.6835  23
   2  -5  -3 294.470 23.4452  20
   2  -5  -3 389.142 38.6578   1
  -2  -5   3 341.865 46.0155  21
  -2  -5   3 322.361 34.0753  20
   2  -5  -3 321.482 60.3561  25
   2  -5  -3 321.905 72.8386  24
  -2  -5   3 380.495 75.0050  24
  -2  -5   3 405.306 45.4082   1
  -2  -5   2 1085.72 55.4924  20
  -2  -5   2 1271.98 64.4241   1
  -2  -5   2 1401.33 88.9692  24
  -2  -5   2 1253.12 51.3716  23
   2  -5  -2 1170.40 78.0996  25
   2  -5  -2 1323.06 90.0942  24
   2  -5  -2 1216.61 60.8429   1
   2  -5  -1 513.140 64.8417  25
  -2  -5   1 561.768 76.0197  24
   2  -5  -1 468.545 46.2803   1
  -2  -5   1 524.315 47.1684   1
  -2  -5   1 560.495 34.5895  23
   2  -5  -1 523.222 78.1147  24
  -2  -5   1 459.249 38.9399  20
   2  -5   0 4482.48 211.332  25
  -2  -5   0 4858.39 213.363  24
  -2  -5   0 4831.35 194.802  23
  -2  -5   0 4565.58 199.878  20
  -2  -5   0 4677.52 201.621   1
   2  -5   0 4885.69 203.105  21
   2  -5   0 4517.29 202.866   1
  -2  -5  -1 2174.02 103.122  20
   2  -5   1 2193.44 107.621   1
   2  -5   1 2065.49 119.541  25
  -2  -5  -1 2388.33 97.2043  23
  -2  -5  -1 2243.17 104.282   1
  -2  -5  -1 2306.99 122.964  24
   2  -5   1 2283.05 106.924  21
   2  -5   2 11979.3 502.925  24
  -2  -5  -2 12745.2 487.167  23
  -2  -5  -2 10958.4 492.127  20
   2  -5   2 11639.1 500.583  25
  -2  -5  -2 11840.6 491.861   1
   2  -5   2 12304.4 494.574  21
   2  -5   2 11667.6 487.020  23
   2  -5   2 11688.1 495.107   1
   2  -5   3 4889.23 215.147  25
   2  -5   3 4934.20 204.638  21
  -2  -5  -3 4645.14 202.896  20
  -2  -5  -3 4792.99 201.302   1
  -2  -5  -3 4658.56 207.525   2
   2  -5   3 4633.55 206.538   1
   2  -5   3 4815.17 197.057  23
   2  -5   3 4789.81 219.593  24
   2  -5   4 2074.69 121.972  24
   2  -5   4 1866.36 93.9012  21
  -2  -5  -4 1874.81 93.1924  20
  -2  -5  -4 1928.61 100.142   2
   2  -5   4 1998.86 86.7698  23
  -2  -5  -4 2071.75 90.3638   1
  -2  -5  -4 2011.22 110.391  24
  -2  -5  -5 2947.45 142.400  24
  -2  -5  -5 2920.78 135.883   2
   2  -5   5 3051.70 130.879  21
  -2  -5  -5 2828.94 130.483  20
  -2  -5  -5 2929.06 125.905   1
   2  -5   5 2930.53 124.206  23
  -2  -5  -5 2915.17 121.765  35
   2  -5   5 2895.19 152.320  24
  -2  -5  -6 1648.17 69.0988  35
   2  -5   6 1624.76 80.5760  21
   2  -5   6 1614.45 73.4458  23
  -2  -5  -6 1711.47 88.6128   2
  -2  -5  -6 1477.08 73.0740   1
  -2  -5  -6 1463.86 79.9064  20
   2  -5   7 243.571 32.9687  23
   2  -5   7 150.016 35.3050  21
  -2  -5  -7 168.381 37.3160  20
  -2  -5  -7 202.656 21.0313  35
   2  -5   8 719.593 38.6851   9
  -2  -5  -8 786.591 37.0773  35
   2  -5   8 788.211 47.0420  23
   2  -5   9 2016.24 94.3776   9
   2  -5   9 2105.78 99.2480  23
   2  -5   9 2191.53 94.8832  10
   2  -5  10 803.379 41.4165   9
   2  -5  10 776.686 51.6905  23
   2  -5  10 784.982 41.9565  10
   2  -5  11 2491.96 103.718  10
   2  -5  11 2400.11 109.072  23
   2  -5  11 2368.70 103.285   9
   2  -5  12 239.083 29.4105  10
   2  -5  12 250.538 42.0395  23
   2  -5  12 228.185 27.2710   9
   2  -5  13 90.8041 43.3050  23
   2  -5  13 114.568 26.2714   9
   2  -5  14 759.475 42.7333   9
   2  -5  14 749.476 56.2148  23
   2  -5  14 745.122 42.5782   8
   2  -5  15 2541.35 115.359   8
   2  -5  15 2591.38 123.786  23
   2  -5  15 2893.87 115.774   9
   2  -5  16 4438.87 192.553  23
   2  -5  16 4433.97 185.695   8
   2  -5  16 4465.32 185.715   9
   2  -5  17 1407.75 68.0529   8
   2  -5  17 1442.02 68.5838   9
   2  -5  17 1350.15 81.9466  23
   2  -5  18 2131.17 95.1549   9
   2  -5  18 2138.89 95.0713   8
   2  -5  18 2054.90 107.600  23
   2  -5  19 1904.49 86.1126   9
   2  -5  19 1822.97 85.5788   8
   2  -5  20 1990.28 88.8188   9
   2  -5  20 1857.57 88.0609   8
   2  -5  21 347.267 38.6380   9
   2  -5  21 343.619 36.3907   8
   2  -5  21 356.511 33.1730   4
   2  -5  22 927.824 48.2881   8
   2  -5  22 969.864 46.2808   4
   2  -5  23 109.987 31.2473  33
   2  -5  23 191.030 27.1481   4
   2  -5  23 148.218 30.1418   8
   2  -5  23 172.902 33.3801  19
   2  -5  24 43.8161 27.8747  33
   2  -5  24 101.847 24.7426   4
   2  -5  24 73.7486 26.8385   8
   2  -5  24 87.4658 30.4515  19
   2  -5  25 176.537 26.4439   8
   2  -5  25 125.645 26.9901  33
   2  -5  25 227.061 23.7899   4
   2  -5  25 178.936 43.6599  23
   2  -5  25 194.102 29.8228  19
   2  -5  26 24.4448 37.0562  23
   2  -5  26 4.99860 26.5202  19
   2  -5  27 4.92748 32.5897  23
   2  -5  27 17.5445 23.2145  19
   2  -5  28 57.4281 27.1967  23
   2  -5  28 69.5340 21.3192  19
  -2  -4  31 170.954 21.3499  19
  -2  -4  30 350.060 33.5946  23
  -2  -4  30 319.825 28.6939  33
  -2  -4  29 155.703 34.7586  23
  -2  -4  29 172.054 27.1469  19
  -2  -4  29 183.286 28.3591  33
  -2  -4  28 289.605 33.7884  33
  -2  -4  28 250.978 41.2728  23
  -2  -4  28 328.493 32.4400  19
  -2  -4  28 310.489 27.1487  13
  -2  -4  27 57.9366 33.2251  33
  -2  -4  27 24.7215 43.6570  23
  -2  -4  27 0.99545 25.6500  13
  -2  -4  27 33.6201 31.2299  19
  -2  -4  26 217.115 38.0047  33
  -2  -4  26 134.399 50.0208  23
  -2  -4  26 211.697 25.6516   8
  -2  -4  26 197.483 33.1044   9
  -2  -4  26 225.166 30.1838  13
  -2  -4  26 217.114 36.4356  19
  -2  -4  25 27.1195 29.2822  13
  -2  -4  25 39.9785 37.4574  33
  -2  -4  25 102.694 33.9175   9
  -2  -4  25 43.3921 25.3836   8
  -2  -4  25 11.0413 51.0519  23
  -2  -4  24 164.111 27.8387   8
  -2  -4  24 134.036 54.2931  23
  -2  -4  24 114.085 40.0190  33
  -2  -4  24 137.080 35.7281   9
  -2  -4  24 224.750 31.8698  13
  -2  -4  23 121.721 36.4853   9
  -2  -4  23 125.885 31.2321  13
  -2  -4  23 112.192 56.6499  23
  -2  -4  23 140.376 37.0119  11
  -2  -4  23 125.516 41.2846  33
  -2  -4  23 148.393 28.8182   8
  -2  -4  22 256.170 58.1977  23
  -2  -4  22 302.454 37.4596   9
  -2  -4  22 270.768 32.7565   8
  -2  -4  22 272.229 43.4238  33
  -2  -4  22 283.414 33.6266  13
  -2  -4  22 296.357 38.7242  11
  -2  -4  21 124.099 29.5081   8
  -2  -4  21 86.0322 33.2518   9
  -2  -4  21 107.223 30.1442  13
  -2  -4  21 126.746 55.9793  23
  -2  -4  21 137.633 34.4852  11
  -2  -4  20 232.053 31.7116  13
  -2  -4  20 185.649 55.2178  23
  -2  -4  20 259.099 35.3682  11
  -2  -4  20 231.290 30.1322   8
  -2  -4  20 267.903 34.4956   9
  -2  -4  19 409.588 35.8540   9
  -2  -4  19 436.311 33.5614  13
  -2  -4  19 320.452 55.1876  23
  -2  -4  19 398.162 32.2957   8
  -2  -4  19 436.817 36.6956  11
  -2  -4  18 881.153 47.4993   8
  -2  -4  18 934.455 48.2610  13
  -2  -4  18 970.852 49.5439   9
  -2  -4  18 923.342 65.5431  23
  -2  -4  18 882.819 59.6635  14
  -2  -4  18 923.616 50.7217  11
  -2  -4  17 1224.05 71.8654  23
  -2  -4  17 1313.38 58.9181  13
  -2  -4  17 1205.84 59.3364   9
  -2  -4  17 1294.24 60.4770  11
  -2  -4  17 1266.30 67.2708  14
  -2  -4  17 1179.08 57.9390   8
  -2  -4  16 242.371 38.7119  14
  -2  -4  16 256.313 26.2553  13
  -2  -4  16 258.305 28.4563   9
  -2  -4  16 269.087 44.9303  23
  -2  -4  16 257.148 28.4877  11
  -2  -4  15 361.787 45.3219  23
  -2  -4  15 364.890 29.5117   9
  -2  -4  15 321.100 38.0528  14
  -2  -4  15 369.484 27.4543  13
  -2  -4  15 385.692 29.7382  11
  -2  -4  14 267.910 35.3612  14
  -2  -4  14 249.230 42.3566  23
  -2  -4  14 289.188 26.7888  11
  -2  -4  14 307.053 24.9100  13
  -2  -4  14 255.216 26.6811   9
  -2  -4  14 284.834 30.0836  10
  -2  -4  13 3127.39 131.776  10
  -2  -4  13 3050.46 130.973   9
  -2  -4  13 3294.45 134.329  14
  -2  -4  12 328.550 64.8813  25
  -2  -4  12 294.662 73.2921  24
  -2  -4  12 298.616 28.4713  10
  -2  -4  12 268.991 25.6245   9
   2  -4 -12 310.805 37.5744  21
   2  -4 -12 218.489 48.3955  24
  -2  -4  11 2473.74 108.044  10
   2  -4 -11 2502.52 119.288  24
  -2  -4  11 2476.73 121.275   1
  -2  -4  11 2707.86 134.839  24
   2  -4 -11 2697.91 121.246   2
   2  -4 -11 2669.81 115.693  21
  -2  -4  11 2542.08 129.174  25
   2  -4 -10 6147.33 261.555  24
  -2  -4  10 6012.22 268.253  25
  -2  -4  10 6034.89 270.471  24
  -2  -4  10 5925.59 259.247  21
  -2  -4  10 6282.82 263.574   1
   2  -4 -10 6252.27 258.596  21
   2  -4 -10 6321.38 262.588   2
  -2  -4   9 16212.9 640.793   1
  -2  -4   9 15190.3 643.510  24
   2  -4  -9 15757.9 638.849   2
  -2  -4   9 15433.9 631.871  33
   2  -4  -9 16115.6 639.217  24
  -2  -4   9 15171.7 632.996  23
   2  -4  -9 15809.3 636.716  21
  -2  -4   9 15806.4 643.372  25
  -2  -4   8 2652.78 116.818  23
   2  -4  -8 2753.23 130.901  24
  -2  -4   8 2735.72 126.895   1
  -2  -4   8 2825.18 136.020  25
   2  -4  -8 2639.08 123.923   2
  -2  -4   8 2835.93 141.549  24
   2  -4  -7 2394.42 105.926   2
  -2  -4   7 2490.69 120.069  25
  -2  -4   7 2364.98 98.3971  23
   2  -4  -7 2455.25 115.305  24
  -2  -4   7 2447.09 109.395   1
   2  -4  -7 2085.01 94.0716   1
  -2  -4   7 2596.84 124.312  24
  -2  -4   6 1142.66 87.5452  24
   2  -4  -6 1040.73 78.8929  24
   2  -4  -6 994.460 48.4883   1
  -2  -4   6 1021.44 81.6271  25
  -2  -4   6 987.296 52.2775  23
   2  -4  -6 865.952 60.7457   2
  -2  -4   5 638.902 39.9915  23
   2  -4  -5 645.245 40.2049   1
   2  -4  -5 725.794 39.9834  20
  -2  -4   5 569.625 43.0394  20
  -2  -4   5 714.325 80.7777  24
  -2  -4   5 684.027 70.8859  25
   2  -4  -5 591.378 50.1221   2
   2  -4  -5 735.238 73.7595  24
   2  -4  -5 554.339 59.3475  25
  -2  -4   4 354.318 32.1451  23
   2  -4  -4 335.159 35.6702   1
  -2  -4   4 396.899 66.4672  25
   2  -4  -4 340.951 70.1745  24
   2  -4  -4 401.121 29.6939  20
   2  -4  -4 359.148 44.4934   2
   2  -4  -4 326.067 57.9368  25
  -2  -4   4 329.370 35.0263  20
  -2  -4   4 372.504 46.8024   1
  -2  -4   4 402.529 76.7072  24
   2  -4  -3 2716.36 111.946  20
  -2  -4   3 2703.12 135.563  24
   2  -4  -3 2561.25 126.692  25
  -2  -4   3 2620.32 111.743  23
   2  -4  -3 2569.79 134.317  24
   2  -4  -3 2653.58 119.090   2
  -2  -4   3 2524.95 115.993  20
  -2  -4   3 2675.05 120.633   1
   2  -4  -3 2661.75 116.110   1
   2  -4  -2 25328.0 1053.19  25
   2  -4  -2 25622.1 1046.84  20
  -2  -4   2 27323.1 1055.25  24
  -2  -4   2 26428.2 1051.64   1
   2  -4  -2 25898.4 1050.08   1
   2  -4  -2 26056.1 1055.13  24
   2  -4  -2 24944.5 1050.53   2
  -2  -4   2 25877.7 1050.28  20
  -2  -4   1 2961.14 113.162   1
  -2  -4   1 2879.89 110.337  20
  -2  -4   1 3027.35 129.374  24
   2  -4  -1 2691.27 122.990  25
  -2  -4   0 7589.45 312.285  20
  -2  -4   0 7817.44 320.550  24
  -2  -4   0 7389.45 312.903   1
   2  -4   0 7471.95 319.834  25
   2  -4   1 867.890 55.0953  21
   2  -4   1 811.442 75.6164  25
  -2  -4  -1 924.470 53.6627   1
  -2  -4  -1 786.169 79.4568  24
  -2  -4  -1 969.492 52.4923  20
  -2  -4  -2 2100.34 94.2239   1
   2  -4   2 2149.60 121.358  24
  -2  -4  -2 2056.21 101.174   2
  -2  -4  -2 2005.88 94.8986  20
   2  -4   2 1982.82 95.6816  21
   2  -4   3 4794.69 218.616  24
  -2  -4  -3 4637.66 207.220   2
   2  -4   3 4838.10 203.985  21
  -2  -4  -3 4869.86 201.723   1
  -2  -4  -3 4888.68 204.076  20
   2  -4   4 9010.22 370.461  21
  -2  -4  -4 8685.24 371.017  20
  -2  -4  -4 9173.91 367.964   1
  -2  -4  -4 8744.82 373.419   2
   2  -4   4 9121.40 380.990  24
  -2  -4  -5 103.070 34.7742  20
  -2  -4  -5 208.400 46.8058   2
  -2  -4  -5 185.807 63.9645  24
   2  -4   5 140.109 66.5780  25
  -2  -4  -5 204.534 19.4113  35
   2  -4   5 195.178 28.9867  23
   2  -4   5 182.844 35.5321  21
  -2  -4  -5 162.327 28.4343   1
   2  -4   6 594.668 74.6325  25
  -2  -4  -6 536.355 46.4419  20
  -2  -4  -6 554.878 29.2122  35
   2  -4   6 494.917 42.4237  21
  -2  -4  -6 519.426 66.1377  24
  -2  -4  -6 542.165 54.3383   2
   2  -4   6 525.159 37.7038  23
  -2  -4  -6 566.037 35.2390   1
  -2  -4  -7 797.987 42.3879   1
   2  -4   7 817.918 46.4136  23
  -2  -4  -7 851.115 38.6459  35
   2  -4   7 865.436 51.8598  21
  -2  -4  -7 744.035 70.1374  24
  -2  -4  -7 750.948 54.2398  20
   2  -4   7 789.071 77.2048  25
  -2  -4  -8 508.770 48.0965  20
  -2  -4  -8 470.905 60.5440  24
   2  -4   8 523.787 72.0370  25
   2  -4   8 535.367 38.8716  23
   2  -4   8 487.421 42.2040  21
  -2  -4  -8 509.854 27.7521  35
   2  -4   9 2433.62 106.032  23
   2  -4   9 2440.40 127.896  25
   2  -4   9 2535.32 110.441  21
  -2  -4  -9 2360.32 110.705  21
  -2  -4  -9 2311.52 117.223  24
  -2  -4 -10 2057.45 101.988  24
   2  -4  10 1936.20 90.7497  21
   2  -4  10 2241.07 86.5984  23
   2  -4  10 2064.14 115.781  25
   2  -4  11 1469.01 62.1939  10
   2  -4  11 1377.89 61.1758   9
   2  -4  11 1423.94 68.6570  23
   2  -4  12 4011.11 156.818  23
   2  -4  12 3746.93 152.709  10
   2  -4  12 3675.83 152.117   9
   2  -4  13 5761.06 256.887  32
   2  -4  13 6211.49 255.639   8
   2  -4  13 6526.78 259.444  23
   2  -4  13 6478.61 255.766   9
   2  -4  14 3525.55 150.626   8
   2  -4  14 3635.64 156.286  23
   2  -4  14 3699.01 150.808   9
   2  -4  15 48.6266 25.8656   9
   2  -4  15 53.4906 24.2142   8
   2  -4  15 2.28316 25.8408  11
   2  -4  16 705.856 41.9009   9
   2  -4  16 729.466 40.9132   8
   2  -4  17 267.608 30.9214   8
   2  -4  17 283.903 32.7705   9
   2  -4  18 2285.92 100.450   8
   2  -4  19 1606.43 75.6646   8
   2  -4  20 2696.76 133.998  23
   2  -4  20 2858.00 121.800   8
   2  -4  21 1640.28 78.3404   8
   2  -4  21 1539.80 95.6251  23
   2  -4  21 1798.80 77.7108   4
   2  -4  22 257.815 30.3817   4
   2  -4  22 268.213 32.5760   8
   2  -4  23 451.437 60.2294  23
   2  -4  23 523.170 37.9149   8
   2  -4  23 573.590 42.5547  19
   2  -4  23 550.288 36.4833   4
   2  -4  24 162.864 26.8078   4
   2  -4  24 117.467 51.4977  23
   2  -4  24 124.122 28.8809   8
   2  -4  24 111.196 33.7824  19
   2  -4  25 33.2132 48.4882  23
   2  -4  25 47.4294 31.9784  19
   2  -4  25 26.7148 24.3128   4
   2  -4  26 93.7596 30.8030  19
   2  -4  26 104.259 42.7064  23
   2  -4  26 55.6361 31.2336  33
   2  -4  26 87.2572 22.9445   4
   2  -4  27 73.1557 28.4602  19
   2  -4  27 51.1805 38.8069  23
   2  -4  27 63.8946 27.7269  33
   2  -4  28 14.9671 24.4920  33
   2  -4  28 33.8545 25.2191  19
   2  -4  28 36.2095 33.5455  23
   2  -4  29 154.433 30.1259  23
   2  -4  29 189.418 24.2070  19
  -2  -3  32 39.6956 19.3711  19
  -2  -3  31 2.26333 22.5541  19
  -2  -3  31 15.2279 26.7067  23
  -2  -3  31 11.0926 18.5379  13
  -2  -3  31 13.0037 23.7576  33
  -2  -3  30 43.2320 26.3071  19
  -2  -3  30 29.2691 23.0306  13
  -2  -3  30 63.2536 28.6920  33
  -2  -3  30 23.1978 32.1772  23
  -2  -3  29 41.7904 32.2363  33
  -2  -3  29 43.5228 29.1104  19
  -2  -3  29 86.9362 37.5426  23
  -2  -3  29 70.8852 26.8103  13
  -2  -3  28 992.743 59.2652  33
  -2  -3  28 937.811 61.4173  23
  -2  -3  28 1082.03 54.4363  13
  -2  -3  28 1094.33 54.7290  19
  -2  -3  27 488.564 52.0420  23
  -2  -3  27 578.543 41.8911  19
  -2  -3  27 553.945 40.8605  13
  -2  -3  27 505.141 46.9615  33
  -2  -3  26 364.829 37.9428  13
  -2  -3  26 307.852 45.1571  33
  -2  -3  26 339.152 37.9908  19
  -2  -3  26 276.346 52.2491  23
  -2  -3  25 681.915 49.7676  11
  -2  -3  25 627.193 44.4650  13
  -2  -3  25 556.261 59.1968  23
  -2  -3  25 642.305 43.3412   9
  -2  -3  25 623.036 36.6884   8
  -2  -3  24 774.062 63.4406  23
  -2  -3  24 769.170 46.7388   9
  -2  -3  24 705.429 52.2824  11
  -2  -3  24 765.707 47.5377  13
  -2  -3  24 682.602 41.1429   8
  -2  -3  23 224.169 40.7711  11
  -2  -3  23 233.912 35.3087  13
  -2  -3  23 247.804 35.6707   9
  -2  -3  23 198.361 28.0048   8
  -2  -3  23 188.710 55.0351  23
  -2  -3  22 1485.48 68.2389   8
  -2  -3  22 1422.45 74.6118  11
  -2  -3  22 1501.79 71.8746   9
  -2  -3  22 1353.84 84.0020  23
  -2  -3  22 1533.54 71.6114  13
  -2  -3  21 905.292 50.4713   9
  -2  -3  21 843.302 46.8564   8
  -2  -3  21 812.094 65.3599  23
  -2  -3  21 921.922 50.1221  13
  -2  -3  21 928.070 53.7479  11
  -2  -3  20 583.064 38.3410   8
  -2  -3  20 603.041 45.3020  11
  -2  -3  20 688.359 42.1349  13
  -2  -3  20 608.550 57.5250  23
  -2  -3  20 732.488 41.8882   9
  -2  -3  19 832.310 45.2429   9
  -2  -3  19 822.767 42.9679   8
  -2  -3  19 715.452 58.7813  23
  -2  -3  19 835.447 48.5992  11
  -2  -3  19 866.085 46.1298  13
  -2  -3  18 608.314 54.0269  23
  -2  -3  18 641.418 36.3795   8
  -2  -3  18 640.145 42.2235  11
  -2  -3  18 659.942 39.7816  13
  -2  -3  18 642.298 38.8676   9
  -2  -3  17 156.320 22.2367   8
  -2  -3  17 179.454 28.8154  11
  -2  -3  17 164.627 42.3495  23
  -2  -3  17 146.206 24.7637   9
  -2  -3  17 168.398 25.6653  13
  -2  -3  16 161.990 24.0994   9
  -2  -3  16 110.894 40.0765  23
  -2  -3  16 140.558 21.2896   8
  -2  -3  16 120.253 23.6766  13
  -2  -3  16 158.276 34.4084  14
  -2  -3  16 129.867 26.7491  11
  -2  -3  15 1041.32 59.9545  23
  -2  -3  15 1131.58 57.4865  14
  -2  -3  15 1130.61 52.6368  11
  -2  -3  15 1006.58 50.5966   9
  -2  -3  15 1131.81 51.5557  13
   2  -3 -14 1764.71 81.4955  21
  -2  -3  14 1633.09 72.2649   9
  -2  -3  14 1678.99 79.0202  23
  -2  -3  14 1690.16 94.1774  25
  -2  -3  14 1642.85 86.8365   1
  -2  -3  14 1648.44 77.2409  14
   2  -3 -13 201.774 33.4296  21
  -2  -3  13 167.062 36.0586  23
  -2  -3  13 184.615 43.0725   1
  -2  -3  13 149.888 21.4665   9
  -2  -3  13 223.553 58.0008  25
  -2  -3  13 167.878 32.8590  21
  -2  -3  13 144.650 66.0215  24
   2  -3 -13 177.210 43.8584   2
  -2  -3  12 578.763 52.7573   1
   2  -3 -12 585.432 53.0458   2
  -2  -3  12 588.453 43.1884  21
  -2  -3  12 572.908 42.2510  23
  -2  -3  12 480.350 72.0246  24
  -2  -3  12 604.885 64.9408  25
   2  -3 -12 580.982 42.7616  21
   2  -3 -11 6028.94 260.229   2
   2  -3 -11 6172.83 256.983  21
  -2  -3  11 6057.27 253.698  23
  -2  -3  11 6016.90 260.569   1
  -2  -3  11 6582.51 258.323  21
   2  -3 -11 6164.80 257.339  24
  -2  -3  11 6368.37 264.649  25
  -2  -3  11 5842.41 265.562  24
   2  -3 -10 3588.19 160.444  24
  -2  -3  10 3638.23 162.615   1
  -2  -3  10 3623.29 171.381  24
  -2  -3  10 3642.63 154.869  23
   2  -3 -10 3752.28 158.504  21
  -2  -3  10 3837.16 169.070  25
   2  -3 -10 3888.28 163.223   2
  -2  -3  10 3594.24 158.892  21
   2  -3  -9 3024.18 131.373  21
  -2  -3   9 2927.32 146.829  24
  -2  -3   9 3042.36 132.469  21
  -2  -3   9 3094.30 136.514   1
  -2  -3   9 2963.84 143.272  25
   2  -3  -9 2925.90 135.470   2
   2  -3  -9 3150.24 136.281  24
  -2  -3   8 878.399 80.0117  24
  -2  -3   8 935.932 74.0302  25
  -2  -3   8 844.684 59.0940   1
   2  -3  -8 902.556 66.9916  24
   2  -3  -8 906.069 56.7881   2
   2  -3  -8 820.339 50.4231  21
  -2  -3   8 909.887 51.9580  21
  -2  -3   7 9178.68 378.083  25
  -2  -3   7 8935.32 372.929  21
  -2  -3   7 9032.99 374.722   1
   2  -3  -7 8964.63 373.132   2
  -2  -3   7 9004.32 378.839  24
   2  -3  -7 9278.59 375.154  24
  -2  -3   6 3283.52 140.295   1
   2  -3  -6 3254.88 137.892   2
  -2  -3   6 3103.29 137.376  21
  -2  -3   6 3492.21 150.886  24
  -2  -3   6 3272.43 147.404  25
   2  -3  -6 3205.18 144.615  24
   2  -3  -6 3071.22 130.230   1
  -2  -3   6 3189.79 136.364  20
   2  -3  -5 6945.83 299.564  25
  -2  -3   5 7533.56 306.262  24
  -2  -3   5 7444.53 299.722  21
   2  -3  -5 7383.17 295.507   1
  -2  -3   5 7164.42 298.682  20
  -2  -3   5 7193.57 304.711  25
  -2  -3   5 7195.27 300.592   1
   2  -3  -5 7011.12 298.868   2
   2  -3  -5 7117.81 303.218  24
   2  -3  -4 6127.19 252.965   1
   2  -3  -4 5816.82 257.417  25
  -2  -3   4 6084.86 254.968  20
  -2  -3   4 6420.16 256.322  21
   2  -3  -4 6217.75 261.087  24
   2  -3  -4 5999.09 255.455   2
  -2  -3   4 6423.62 263.649  24
  -2  -3   4 6384.55 262.013  25
  -2  -3   3 846.786 68.0613  25
   2  -3  -3 724.505 49.4365   2
  -2  -3   3 761.515 74.6448  24
   2  -3  -3 822.370 73.0312  24
   2  -3  -3 871.387 40.9953  20
  -2  -3   3 872.114 47.1154  20
   2  -3  -3 659.862 62.1165  25
  -2  -3   2 6241.49 253.803  20
  -2  -3   2 6116.27 261.219  24
   2  -3  -2 5623.38 257.972  25
   2  -3  -2 5955.86 254.122   2
   2  -3  -2 6309.72 250.435  20
   2  -3  -2 5940.19 261.419  24
  -2  -3   1 51.4957 29.1970  20
  -2  -3   1 32.8104 35.3295   1
  -2  -3   1 77.3353 65.1056  24
   2  -3  -1 44.0054 54.3205  25
   2  -3  -1 27.0593 34.9310   2
   2  -3  -1 43.9856 13.1475  20
   2  -3   0 3586.60 172.005  25
  -2  -3   0 3974.78 174.642  24
  -2  -3   0 3925.17 164.620   1
  -2  -3   0 3949.59 164.136  20
  -2  -3  -1 842.576 47.4563  20
  -2  -3  -1 831.949 72.6425  24
   2  -3   1 813.629 48.4044  21
  -2  -3  -1 806.123 48.2725   1
   2  -3   2 5407.24 223.227  21
  -2  -3  -2 5172.44 230.117  24
  -2  -3  -2 5438.44 223.715  20
  -2  -3  -2 5331.15 222.016   1
   2  -3   3 1999.55 113.725  25
  -2  -3  -3 2305.21 97.9344   1
   2  -3   3 2209.88 99.3786  21
  -2  -3  -3 2320.79 100.940  20
  -2  -3  -4 16597.1 689.945   1
  -2  -3  -4 16807.2 693.218  20
   2  -3   4 17437.8 691.576  21
   2  -3   4 17328.4 696.699  25
   2  -3   5 5823.27 245.954  21
  -2  -3  -5 6098.37 243.465   1
  -2  -3  -5 5736.00 251.364  24
   2  -3   5 5724.01 254.694  25
   2  -3   6 7692.55 335.668  25
   2  -3   6 7642.82 328.184  21
  -2  -3  -6 8279.11 325.423   1
  -2  -3  -6 7730.87 331.737  24
   2  -3   7 5783.36 240.630  23
   2  -3   7 6030.93 244.162  21
  -2  -3  -7 5908.84 247.638  24
   2  -3   7 5757.95 253.199  25
  -2  -3  -8 576.201 57.3708  24
   2  -3   8 558.441 41.1653  21
   2  -3   8 516.694 37.9721  23
   2  -3   8 518.402 69.7267  25
  -2  -3  -9 1736.85 90.7197  24
   2  -3   9 1725.29 81.8356  21
   2  -3   9 1807.52 79.3542  23
   2  -3   9 1622.19 100.808  25
  -2  -3 -10 520.168 53.9758   2
   2  -3  10 470.679 73.3979  25
   2  -3  10 416.252 41.4655  21
  -2  -3 -11 3278.69 146.733  21
   2  -3  11 3126.73 139.898  32
  -2  -3 -11 3322.50 149.908   2
   2  -3  11 3446.93 158.791  25
   2  -3  12 3149.42 125.616  32
   2  -3  12 2993.17 144.073  25
   2  -3  12 3144.92 130.600  21
   2  -3  12 2954.14 122.793   9
   2  -3  12 2720.09 122.354   8
  -2  -3 -12 3115.52 132.011  21
   2  -3  13 3875.99 174.287  25
   2  -3  13 3705.13 154.739   9
   2  -3  13 3633.33 154.515   8
   2  -3  13 3967.50 157.549  32
   2  -3  14 5931.21 231.967  11
   2  -3  14 5515.08 230.411   9
   2  -3  14 5464.78 230.240   8
   2  -3  14 5646.44 232.896  32
   2  -3  15 2429.46 108.294  32
   2  -3  15 2594.32 105.893  11
   2  -3  15 2344.15 103.500   8
   2  -3  16 587.291 36.8944  13
   2  -3  16 605.730 37.2592   8
   2  -3  16 609.902 41.7417  11
   2  -3  16 687.430 54.6650  23
   2  -3  16 687.060 48.3649  32
   2  -3  17 1938.15 88.7089   8
   2  -3  17 2010.20 91.3774  11
   2  -3  17 2103.65 88.9015  13
   2  -3  17 2076.56 95.3846  32
   2  -3  17 2048.20 99.1040  23
   2  -3  18 1311.70 67.3453  11
  -2  -3 -18 1299.91 70.0492   3
   2  -3  18 1405.12 72.2177  32
   2  -3  18 1362.17 63.4008   8
   2  -3  18 1338.56 63.6603  13
   2  -3  18 1318.73 77.9690  23
   2  -3  19 2299.73 114.926  23
   2  -3  19 2360.32 103.868   8
   2  -3  19 2258.37 111.232  32
  -2  -3 -19 2307.43 108.887   3
   2  -3  19 2436.40 104.659  13
   2  -3  19 2543.33 103.572   4
   2  -3  20 1457.40 85.0837  23
   2  -3  20 1534.74 68.1818   4
   2  -3  20 1437.54 68.7093   8
  -2  -3 -20 1460.86 76.1323   3
   2  -3  20 1439.54 79.5603  32
   2  -3  20 1413.41 69.5912  13
   2  -3  21 609.390 41.3632   8
   2  -3  21 687.068 40.6130   4
   2  -3  21 660.266 42.7552  13
   2  -3  21 585.766 64.8268  23
  -2  -3 -21 718.141 52.6772   3
   2  -3  22 304.517 33.1002   8
   2  -3  22 356.725 32.5803   4
   2  -3  22 341.017 60.4755  23
   2  -3  22 334.711 34.8124  13
  -2  -3 -22 322.598 46.0572   3
   2  -3  23 80.9332 27.9845   4
   2  -3  23 115.700 55.7795  23
   2  -3  23 137.815 28.7229   8
   2  -3  23 122.042 30.6591  13
  -2  -3 -23 84.5111 43.2213   3
   2  -3  24 478.318 34.8117   4
   2  -3  24 422.645 58.3465  23
   2  -3  24 456.610 34.6859   8
   2  -3  24 484.604 36.7058  13
   2  -3  25 311.000 30.2240   4
   2  -3  25 314.151 53.8161  23
   2  -3  25 335.396 32.5443  13
   2  -3  26 113.284 46.6397  23
   2  -3  26 61.4374 26.6654  13
   2  -3  26 51.5329 24.3605   4
   2  -3  27 140.666 25.4720  13
   2  -3  27 115.872 43.5438  23
   2  -3  28 62.3645 38.9641  23
   2  -3  28 73.2210 30.7451  33
   2  -3  29 71.7479 32.9202  23
   2  -3  29 70.2932 27.3912  33
   2  -3  30 83.0347 28.2422  23
   2  -3  30 14.3856 22.7856  33
  -2  -2  32 154.014 22.7071  19
  -2  -2  31 248.085 27.1350  19
  -2  -2  31 220.994 27.0298  13
  -2  -2  30 816.535 44.9579  13
  -2  -2  30 776.502 43.4517  19
  -2  -2  30 691.378 47.2562  23
  -2  -2  29 267.514 34.2459  13
  -2  -2  29 231.051 40.3659  23
  -2  -2  29 323.653 32.7394  19
  -2  -2  28 74.9189 33.6866  13
  -2  -2  28 154.476 42.2264  23
  -2  -2  28 115.394 32.1334  19
  -2  -2  27 148.609 34.2483  19
  -2  -2  27 148.892 36.1231  13
  -2  -2  27 66.6850 45.2504  23
  -2  -2  26 145.539 33.9970  19
  -2  -2  26 75.5724 48.1370  23
  -2  -2  26 99.1867 36.6672  13
  -2  -2  25 102.492 37.2744  13
  -2  -2  25 128.802 34.7375  19
  -2  -2  25 125.143 49.6931  23
  -2  -2  25 134.061 41.9959  11
  -2  -2  24 1133.46 70.7918  23
  -2  -2  24 1040.42 64.4005  11
  -2  -2  24 1126.71 61.3525  13
  -2  -2  24 1133.05 57.7585   9
  -2  -2  23 1423.40 64.2281   8
  -2  -2  23 1389.67 79.9524  23
  -2  -2  23 1418.44 68.0593   9
  -2  -2  23 1369.88 73.4252  11
  -2  -2  23 1432.29 70.6028  13
  -2  -2  22 320.027 28.1993   8
  -2  -2  22 400.496 52.4149  23
  -2  -2  22 314.761 34.9280   9
  -2  -2  22 328.536 37.0605  13
  -2  -2  22 338.756 41.7240  11
  -2  -2  21 1069.38 53.5768   9
  -2  -2  21 1029.37 54.5760  13
  -2  -2  21 1026.75 57.9869  11
  -2  -2  21 921.083 64.4279  23
  -2  -2  21 992.268 49.1863   8
  -2  -2  20 153.529 46.7488  23
  -2  -2  20 185.720 25.0009   8
  -2  -2  20 188.660 31.2167  13
  -2  -2  20 226.360 29.8133   9
  -2  -2  20 203.209 35.5527  11
  -2  -2  20 146.890 40.6296  14
  -2  -2  19 1146.88 59.3644  11
  -2  -2  19 1153.03 53.7784   8
  -2  -2  19 1164.16 57.2185  13
  -2  -2  19 1165.38 63.2121  14
  -2  -2  19 1202.75 55.9821   9
  -2  -2  19 1070.72 65.5850  23
  -2  -2  18 1209.69 53.7317   9
  -2  -2  18 1082.26 54.8867  13
  -2  -2  18 1082.23 63.3801  23
  -2  -2  18 1138.32 61.2565  14
  -2  -2  18 1170.94 57.3394  11
  -2  -2  18 1031.65 51.7253   8
  -2  -2  17 1006.78 57.8627  23
  -2  -2  17 1041.19 52.2246  11
  -2  -2  17 1055.96 55.9213  14
  -2  -2  17 1051.22 48.8568   9
  -2  -2  17 954.554 47.1321   8
  -2  -2  17 1050.79 50.0769  13
  -2  -2  16 431.692 41.6958  23
  -2  -2  16 392.353 32.7044  11
  -2  -2  16 411.431 26.4917   8
  -2  -2  16 419.751 41.1259  32
  -2  -2  16 459.041 28.9704   9
  -2  -2  16 464.459 30.3432  13
  -2  -2  16 413.406 37.2204  14
  -2  -2  15 4371.52 193.156   1
   2  -2 -15 4644.71 192.210  21
  -2  -2  15 4567.95 187.663  32
  -2  -2  15 4618.24 186.371  11
  -2  -2  15 4483.08 187.812  14
  -2  -2  15 4499.66 187.913  23
  -2  -2  15 4518.13 184.582   9
  -2  -2  15 4284.33 185.116  10
  -2  -2  14 317.972 45.6113   1
  -2  -2  14 357.794 38.5682  21
  -2  -2  14 389.137 36.9976  32
  -2  -2  14 361.917 54.4590  25
  -2  -2  14 338.133 38.2359  23
   2  -2 -14 415.642 40.3855  21
   2  -2 -14 478.409 49.5472   2
   2  -2 -13 3968.32 170.860  21
  -2  -2  13 3912.11 170.720  21
  -2  -2  13 3847.34 173.110   1
   2  -2 -13 3837.36 174.456   2
  -2  -2  13 4000.18 175.763  25
  -2  -2  13 4202.44 167.497  32
  -2  -2  13 4035.11 167.495  23
  -2  -2  12 532.277 39.4239  32
  -2  -2  12 578.847 61.8230  25
  -2  -2  12 602.700 50.3009   1
   2  -2 -12 545.140 42.4329  21
   2  -2 -12 654.287 51.0177   2
  -2  -2  12 484.698 40.1177  23
  -2  -2  11 5607.14 235.616  23
  -2  -2  11 5886.48 235.499  32
  -2  -2  11 5944.01 238.879  21
   2  -2 -11 5800.87 238.473  21
  -2  -2  11 5429.10 240.816   1
   2  -2 -11 5376.79 240.517   2
  -2  -2  11 5926.28 243.495  25
   2  -2 -10 3372.88 145.887  21
  -2  -2  10 3256.18 149.362   1
   2  -2 -10 3321.05 148.560   2
  -2  -2  10 3315.57 143.433  23
  -2  -2  10 3570.89 146.841  21
  -2  -2  10 3576.93 143.121  32
  -2  -2  10 3527.82 153.325  25
  -2  -2   9 2560.47 117.296  25
  -2  -2   9 2509.58 107.821  21
   2  -2  -9 2405.28 110.429   2
   2  -2  -9 2535.20 107.001  21
  -2  -2   9 2367.61 111.075   1
   2  -2  -9 2394.40 108.389  24
  -2  -2   8 2186.28 111.571  25
   2  -2  -8 2395.44 100.889  21
   2  -2  -8 2215.83 103.413  24
  -2  -2   8 2160.84 104.727   1
  -2  -2   8 2255.61 100.992  21
   2  -2  -8 2467.78 104.174   2
  -2  -2   7 1408.50 67.4856  21
   2  -2  -7 1446.46 74.4523  24
  -2  -2   7 1421.34 73.2258   1
   2  -2  -7 1450.79 71.1911   2
   2  -2  -7 1440.49 66.7968  21
  -2  -2   7 1447.91 83.1437  25
  -2  -2   6 17442.3 714.174   1
  -2  -2   6 17024.8 715.799  24
  -2  -2   6 17551.8 712.980  21
  -2  -2   6 17647.0 715.852  25
   2  -2  -6 18304.1 713.536  24
   2  -2  -6 17541.7 713.144   2
   2  -2  -6 17151.1 711.902  21
   2  -2  -5 847.916 39.1213   1
  -2  -2   5 932.892 69.5952  25
  -2  -2   5 909.385 50.4608  20
  -2  -2   5 935.561 55.9294   1
   2  -2  -5 935.939 50.6861   2
   2  -2  -5 884.091 52.1401  25
  -2  -2   5 877.249 74.9062  24
   2  -2  -5 989.053 66.2514  24
  -2  -2   4 4254.30 179.604  24
  -2  -2   4 3855.32 169.717  20
   2  -2  -4 3882.78 170.912  25
  -2  -2   4 4180.00 171.515   1
   2  -2  -4 4226.05 176.609  24
  -2  -2   4 4377.42 177.592  25
   2  -2  -4 3879.99 169.173   2
  -2  -2   3 4324.18 181.484   1
   2  -2  -3 4008.82 178.610   2
  -2  -2   3 4528.00 189.110  24
  -2  -2   3 4483.70 187.747  25
   2  -2  -3 4358.85 182.963  25
   2  -2  -3 4682.53 189.158  24
  -2  -2   3 4260.75 179.545  20
   2  -2  -2 23208.2 957.557   2
   2  -2  -2 23109.6 959.286  25
  -2  -2   2 23308.2 960.752  24
  -2  -2   2 24436.9 958.775  20
  -2  -2   2 24192.0 961.043  25
   2  -2  -1 4472.46 186.567   2
  -2  -2   1 4627.31 187.815  20
   2  -2  -1 4494.51 182.885  20
  -2  -2   1 4239.16 196.485  24
  -2  -2   0 11431.6 462.283  20
  -2  -2   0 11110.6 465.559  24
   2  -2   1 1735.08 77.6627  21
  -2  -2  -1 1705.50 78.5103   1
  -2  -2  -1 1712.52 94.6570  24
  -2  -2  -1 1667.33 79.9915  20
  -2  -2  -2 54268.8 2267.99   1
   2  -2   2 57616.3 2268.47  21
   2  -2   2 56491.4 2270.75  25
  -2  -2  -2 56267.4 2270.04  24
   2  -2   3 4109.95 170.120  25
   2  -2   3 3619.02 160.190  21
  -2  -2  -3 3925.79 159.243   1
   2  -2   4 49029.3 1999.60  21
  -2  -2  -4 49708.7 1998.59   1
   2  -2   4 48954.1 2002.42  25
  -2  -2  -5 69183.5 2887.99   2
   2  -2   5 70233.5 2889.31  25
   2  -2   5 72784.7 2886.96  21
  -2  -2  -5 71679.1 2885.41   1
  -2  -2  -6 2420.31 108.412   2
   2  -2   6 2429.40 104.255  21
  -2  -2  -6 2315.11 110.106  24
   2  -2   6 2314.43 117.938  25
   2  -2   7 4684.13 202.283  25
  -2  -2  -7 4745.43 197.351  24
  -2  -2  -7 4553.22 194.914  21
  -2  -2  -7 4375.70 196.754   2
   2  -2   7 4895.75 194.429  21
   2  -2   8 2356.52 107.205  21
   2  -2   8 2255.76 120.910  25
   2  -2   9 10106.8 410.656  21
   2  -2   9 9883.67 415.872  25
  -2  -2  -9 9956.75 412.532   2
   2  -2  10 2931.72 133.754  25
   2  -2  10 2515.89 114.282  32
  -2  -2 -10 3068.34 124.391   2
   2  -2  10 2642.77 118.605  21
   2  -2  11 7485.93 318.357  25
   2  -2  11 7558.04 308.495  32
  -2  -2 -11 7372.65 314.436   2
   2  -2  11 7634.11 312.293  21
  -2  -2 -12 1123.63 66.3714   2
   2  -2  12 1012.20 78.5786  25
   2  -2  12 957.821 58.7756  21
   2  -2  12 1070.36 54.7673  32
  -2  -2 -13 10069.7 431.129   2
   2  -2  13 10645.2 424.788  32
   2  -2  13 10306.9 429.237  21
   2  -2  13 10171.5 433.454  25
   2  -2  14 2229.70 95.8772   8
   2  -2  14 2354.65 100.947  32
   2  -2  15 1685.63 75.3342  11
   2  -2  15 1584.86 72.3071   8
   2  -2  15 1688.08 73.2143  13
   2  -2  15 1718.50 78.8884  32
   2  -2  16 647.858 47.9920  32
   2  -2  16 696.103 37.2603   8
   2  -2  16 597.196 42.1603  11
   2  -2  16 768.482 52.8058  23
   2  -2  16 658.360 38.8390  13
   2  -2  17 741.563 40.9774  13
   2  -2  17 679.397 54.6336  23
   2  -2  17 707.423 38.5135   4
   2  -2  17 721.949 44.3809  11
   2  -2  17 706.313 51.3237  32
   2  -2  17 704.313 38.7143   8
   2  -2  18 396.891 30.2762   4
   2  -2  18 429.804 46.7603  32
   2  -2  18 368.849 30.2126   8
   2  -2  18 425.067 37.6122  11
   2  -2  18 376.681 33.0222   9
   2  -2  18 431.740 33.9358  13
   2  -2  18 431.166 50.4060  23
   2  -2  19 1754.57 72.1907   4
   2  -2  19 1529.95 85.7581  23
   2  -2  19 1559.27 71.8466   8
   2  -2  19 1585.34 74.5745  13
   2  -2  19 1565.26 73.3289   9
   2  -2  19 1517.04 83.2632  32
   2  -2  19 1552.07 77.7076  11
   2  -2  20 889.897 66.4148  23
   2  -2  20 918.761 64.2788  32
   2  -2  20 916.701 51.0761  13
   2  -2  20 893.471 47.0455   8
   2  -2  20 968.431 47.2320   4
   2  -2  20 816.184 49.6879   9
   2  -2  21 1094.78 68.2273  32
   2  -2  21 901.588 49.7513   8
   2  -2  21 1006.77 54.2067  13
   2  -2  21 856.203 52.5437   9
   2  -2  21 1037.01 71.1564  23
   2  -2  21 1038.67 50.2534   4
   2  -2  22 1131.28 58.8972  13
   2  -2  22 1063.47 71.2341  32
   2  -2  22 993.843 53.8646   8
   2  -2  22 1135.34 54.6514   4
   2  -2  22 1074.36 74.2204  23
   2  -2  23 430.693 40.1811  13
   2  -2  23 484.793 35.2320   4
   2  -2  23 420.969 58.8951  23
   2  -2  24 380.695 38.0336  13
   2  -2  24 278.951 55.3768  23
   2  -2  24 346.301 32.4440   4
   2  -2  24 327.194 38.7124  19
  -2  -2 -25 195.658 45.7705   3
   2  -2  25 213.397 51.1401  23
   2  -2  25 194.416 28.3060   4
   2  -2  25 121.946 35.8446  19
   2  -2  25 156.884 34.4312  13
   2  -2  26 128.919 49.2168  23
  -2  -2 -26 233.916 43.4438   3
   2  -2  26 81.1936 26.6185   4
   2  -2  26 145.712 33.3524  13
   2  -2  26 121.187 35.0652  19
   2  -2  27 32.7048 29.6500  13
   2  -2  27 25.8426 43.2346  23
  -2  -2 -27-12.2850 38.8938   3
   2  -2  27 17.6996 23.3667   4
   2  -2  27 67.7475 32.7278  19
   2  -2  28 190.484 28.1528  13
   2  -2  28 165.555 31.5545  19
   2  -2  28 123.855 40.6278  23
   2  -2  29 39.5244 34.9754  23
   2  -2  29 56.1777 28.2753  19
   2  -2  30 39.9964 30.7496  23
   2  -2  30 70.6959 25.0785  19
   2  -2  30 16.8297 26.6305  33
   2  -2  31 242.221 23.7200  19
   2  -2  31 253.667 24.9032  12
  -2  -1  33 147.757 19.2246  19
  -2  -1  33 103.356 21.3673  33
  -2  -1  33 145.525 22.8671  12
  -2  -1  32 396.941 32.1741  33
  -2  -1  32 431.617 32.8470  12
  -2  -1  32 427.539 29.2534  19
  -2  -1  32 427.713 30.8331  13
  -2  -1  31 23.7338 27.7784  13
  -2  -1  31 14.8683 25.3442  19
  -2  -1  31 51.9864 29.5103  33
  -2  -1  30 62.9869 33.8619  33
  -2  -1  30 109.309 28.7281  19
  -2  -1  30 82.8966 32.3334  13
  -2  -1  29 415.639 41.9346  23
  -2  -1  29 524.950 37.7593  19
  -2  -1  29 412.613 44.8065  33
  -2  -1  29 543.198 41.2443  13
  -2  -1  28 991.642 52.9891  19
  -2  -1  28 985.007 56.2087  13
  -2  -1  28 861.873 58.3144  23
  -2  -1  27 210.692 38.8489  13
  -2  -1  27 175.562 44.4520  23
  -2  -1  27 202.405 34.1452  19
  -2  -1  26 78.2304 45.0719  23
  -2  -1  26 59.2923 38.7716  13
  -2  -1  26 88.5743 33.4631  19
  -2  -1  25 772.668 46.8733  19
  -2  -1  25 657.551 57.2971  23
  -2  -1  25 726.506 51.6223  13
  -2  -1  24 31.6392 36.5273  13
  -2  -1  24 102.694 47.0412  23
  -2  -1  24 72.5313 32.5090  19
  -2  -1  23 141.804 45.4486  23
  -2  -1  23 147.187 32.3304  19
  -2  -1  23 85.5852 36.1063  13
  -2  -1  22 130.130 29.7124   9
  -2  -1  22 137.864 46.1065  23
  -2  -1  22 93.7253 34.9848  13
  -2  -1  21 425.580 33.1153   9
  -2  -1  21 428.795 37.2483  13
  -2  -1  20 26.6827 26.3428   9
  -2  -1  20-22.3789 39.9333  23
  -2  -1  20 35.1130 29.0389  13
  -2  -1  20 22.3962 36.8928  14
  -2  -1  19 1228.88 68.9204  23
  -2  -1  19 1408.75 68.2800  14
  -2  -1  19 1396.75 61.7954   9
  -2  -1  19 1277.00 63.5125  13
  -2  -1  18 419.013 41.5668  23
  -2  -1  18 488.967 31.2522   9
  -2  -1  18 431.440 32.8189  13
  -2  -1  18 407.688 39.0530  14
  -2  -1  17 143.660 25.2144  13
  -2  -1  17 93.6883 30.9557  14
  -2  -1  17 151.907 35.4602  23
  -2  -1  17 134.284 23.1258   9
  -2  -1  16 1785.18 79.2097  23
  -2  -1  16 1700.27 75.2720  13
  -2  -1  16 1658.19 73.7742   9
  -2  -1  16 1679.99 78.3160  14
   2  -1 -16 1774.54 85.1937  21
  -2  -1  15 64.5451 32.3350  21
  -2  -1  15 46.9401 32.0370  23
   2  -1 -15 72.0044 35.6592  21
   2  -1 -14 2014.76 92.0025  21
  -2  -1  14 1749.72 89.9286   1
  -2  -1  14 1933.73 86.0023  23
  -2  -1  14 1966.18 90.2392  21
  -2  -1  13 1349.80 64.2485  23
  -2  -1  13 1295.31 72.3218  25
   2  -1 -13 1437.75 69.4674  21
  -2  -1  13 1229.29 68.9623   1
  -2  -1  13 1431.78 67.9139  21
   2  -1 -12 5195.08 218.248  21
  -2  -1  12 5127.67 214.225  23
  -2  -1  12 5430.06 217.877  21
  -2  -1  12 5096.11 218.114   1
  -2  -1  12 5179.27 219.005  25
  -2  -1  11 3158.83 132.441  21
  -2  -1  11 3123.46 129.461  23
  -2  -1  11 2959.04 133.264   1
  -2  -1  11 3206.58 136.018  25
   2  -1 -11 2991.34 132.722  21
  -2  -1  10 14331.9 564.145  21
  -2  -1  10 13427.3 564.634   1
  -2  -1  10 13744.3 564.936  25
   2  -1 -10 13744.3 564.164  21
   2  -1  -9 3073.80 131.049  21
  -2  -1   9 3170.77 135.897  25
  -2  -1   9 3014.64 133.125   1
  -2  -1   9 3124.36 131.126  21
   2  -1  -8 311.172 29.9869  21
  -2  -1   8 349.108 46.7571  25
  -2  -1   8 374.742 36.9726   1
  -2  -1   8 323.515 30.7724  21
  -2  -1   7 3051.03 131.390   1
   2  -1  -7 3000.89 128.559  21
  -2  -1   7 3181.94 135.831  25
  -2  -1   7 3048.04 129.525  21
   2  -1  -6 154.901 29.2431  21
   2  -1  -6 195.490 32.5786  24
  -2  -1   6 229.875 51.0271  25
  -2  -1   6 217.336 38.5633   1
  -2  -1   5 451.373 52.6261  25
   2  -1  -5 557.173 41.5275  24
   2  -1  -5 542.385 33.6633  21
  -2  -1   5 408.838 42.4687   1
   2  -1  -4 43018.8 1807.76  21
  -2  -1   4 46018.9 1809.44  25
   2  -1  -4 45567.0 1808.02  24
  -2  -1   4 44323.6 1808.90   1
   2  -1  -4 44453.2 1806.61   1
   2  -1  -4 45237.6 1807.15  25
  -2  -1   4 44683.3 1808.84  24
  -2  -1   3 1120.20 64.5026  24
  -2  -1   3 1155.00 57.0305   1
   2  -1  -3 1220.76 55.1646  25
   2  -1  -3 1221.01 61.9743  24
  -2  -1   2 62375.7 2519.62   1
  -2  -1   2 62079.7 2519.64  24
  -2  -1   1 434.888 39.0467  24
   2  -1  -1 403.658 20.4462   2
  -2  -1   1 325.538 27.3821   1
   2  -1  -1 358.953 17.8441  20
  -2  -1   0 20974.6 851.147  24
  -2  -1  -1 1722.15 79.5192  24
   2  -1   1 1717.95 79.3897  25
   2  -1   2 38255.3 1552.61  25
  -2  -1  -2 38341.1 1552.03  24
   2  -1   3 25215.5 1015.69  25
  -2  -1  -3 24924.4 1013.37   1
  -2  -1  -4 126723. 5116.82  21
   2  -1   4 125981. 5117.88  25
  -2  -1  -5 106641. 4314.16  21
   2  -1   5 106468. 4315.17  25
  -2  -1  -6 20494.6 812.412  21
  -2  -1  -6 19765.4 812.859   2
   2  -1   6 19512.7 814.232  25
   2  -1   7 35355.5 1442.24  25
  -2  -1  -7 34955.8 1441.29   2
  -2  -1  -7 36148.4 1440.86  21
  -2  -1  -8 5447.08 228.369   2
   2  -1   8 5255.22 231.928  25
  -2  -1  -8 5573.43 226.870  21
   2  -1   9 9275.96 389.757  25
  -2  -1  -9 9637.72 386.696  21
  -2  -1  -9 9283.12 387.818   2
  -2  -1 -10 942.196 52.0920  21
   2  -1  10 972.258 67.7872  25
   2  -1  10 916.307 47.5579  32
  -2  -1 -10 1027.05 57.4706   2
  -2  -1 -11 23725.5 942.108  21
   2  -1  11 23145.2 943.731  25
   2  -1  11 22960.3 938.448  29
  -2  -1 -11 22959.3 943.039   2
  -2  -1 -12 1077.13 63.3796   2
  -2  -1 -12 963.466 56.8214  21
   2  -1  12 957.476 51.3494  29
   2  -1  12 1032.32 72.0682  25
   2  -1  13 3219.11 137.355  29
   2  -1  13 3185.68 147.830  25
  -2  -1 -13 3292.97 144.897   2
  -2  -1 -13 3348.70 142.137  21
  -2  -1 -14 484.503 49.1722   2
   2  -1  15 1136.52 56.3421   9
   2  -1  15 1211.34 55.6258   8
   2  -1  15 1246.67 60.0667  11
   2  -1  15 1258.74 57.9478  13
   2  -1  15 1374.58 55.9433   4
   2  -1  16 1643.92 69.7428   4
   2  -1  16 1577.40 70.3032   9
   2  -1  16 1562.81 69.4373   8
   2  -1  16 1613.80 72.0480  13
   2  -1  16 1558.57 74.0012  11
   2  -1  17 3583.17 155.479  13
   2  -1  17 3624.74 153.566   8
   2  -1  17 4002.53 153.922   4
  -2  -1 -17 3726.76 154.724   7
   2  -1  17 3755.96 157.057  11
   2  -1  17 3524.87 154.088   9
   2  -1  18 5189.57 221.167   9
  -2  -1 -18 5139.84 221.669   7
   2  -1  18 5585.49 221.031   4
   2  -1  18 5330.60 222.768  13
   2  -1  18 5509.10 222.069  19
   2  -1  18 5334.18 220.720   8
   2  -1  18 5575.37 224.505  11
   2  -1  19 654.029 35.9989   8
   2  -1  19 622.325 41.7005  13
   2  -1  19 560.380 38.3469   9
   2  -1  19 649.163 37.1080   4
   2  -1  19 608.471 39.6675  19
  -2  -1 -19 626.228 41.2104   7
   2  -1  19 629.777 46.3763  11
   2  -1  20-25.9104 29.8206  19
   2  -1  20 24.6062 23.4427   8
   2  -1  20 9.20797 25.4998   4
   2  -1  20 39.6023 47.9435  23
  -2  -1 -20 14.8767 31.4646   7
   2  -1  20 22.7187 31.9730  13
   2  -1  21 202.127 50.3392  23
   2  -1  21 223.153 36.1632  13
   2  -1  21 201.415 33.1560  19
   2  -1  21 238.616 28.9938   4
  -2  -1 -21 190.205 34.0017   7
   2  -1  22 48.0499 36.1539  13
   2  -1  22 139.641 52.3844  23
   2  -1  22 58.0570 33.1370  19
  -2  -1 -22 17.7989 34.0649   7
   2  -1  22 8.15394 28.4933   4
   2  -1  23 16.7103 51.4394  23
   2  -1  23 103.445 36.0191  13
  -2  -1 -23-6.46088 32.9124   7
   2  -1  23 41.9890 34.3038  19
   2  -1  23 44.1217 28.7069   4
   2  -1  24 148.233 51.0015  23
   2  -1  24 158.300 35.7560  19
   2  -1  24 174.802 29.8056   4
   2  -1  24 149.368 37.1380  13
   2  -1  25 64.2747 49.8511  23
[truncated: 2,818,442 more chars]
